# Supplementary material for: Comparative genomic analyses reveal genetic characteristics and pathogenic factors of Bacillus pumilus HM-7
Source: Front Microbiol. 2022 Nov 7;13:1008648. doi: 10.3389/fmicb.2022.1008648 (PMC9677121; doi:10.3389/fmicb.2022.1008648)
Supplement: Supplementary Table 1 — Characteristics of the strains used in this study. [file Table_1.xlsx]

## Sheet: Sheet1
Table S1 Characteristics of the strains used in this study.
Genomes	Genome size (Mb)	Genes	Assembly level	Assembly	Bioproject
Bacillus_pumilus 145	3.9	4066	Complete Genome	GCA_003431975.1	PRJNA377620
Bacillus_pumilus 150a	3.7	3801	Complete Genome	GCA_003571425.1	PRJNA377620
Bacillus_pumilus 3-19	3.6	3679	Chromosome	GCA_000714495.3	PRJNA252901
Bacillus_pumilus 7P	3.6	3662	Chromosome	GCA_000691485.4	PRJNA243557
Bacillus_pumilus AR03	3.7	3725	Complete Genome	GCA_020520205.1	PRJNA769965
Bacillus_pumilus BIM B-171	3.8	3965	Complete Genome	GCA_020535425.1	PRJNA770178
Bacillus_pumilus C4	3.7	3750	Chromosome	GCA_001687085.1	PRJNA278012
Bacillus_pumilus EB130	3.6	3636	Complete Genome	GCA_019710455.1	PRJNA753978
Bacillus_pumilus MTCC-B6033	3.8	3871	Complete Genome	GCA_000590455.1	PRJNA239250
Bacillus_pumilus NCTC10337	3.9	3982	Complete Genome	GCA_900186955.1	PRJEB6403
Bacillus_pumilus ONU-554	3.7	3823	Complete Genome	GCA_014489355.1	PRJNA659273
Bacillus_pumilus PDSLzg-1	3.7	3803	Complete Genome	GCA_001704975.1	PRJNA335919
Bacillus_pumilus SAFR-032	3.7	3758	Complete Genome	GCA_000017885.4	PRJNA20391
Bacillus_pumilus SF-4	3.8	3867	Chromosome	GCA_009937765.1	PRJNA594265
Bacillus_pumilus SH-B11	3.9	3944	Complete Genome	GCA_001578165.1	PRJNA276290
Bacillus_pumilus SH-B9	3.9	3992	Complete Genome	GCA_001578205.1	PRJNA276289
Bacillus_pumilus TUAT1	3.7	3842	Complete Genome	GCA_001548215.1	PRJDB4002
Bacillus_pumilus UAMX	3.9	3961	Complete Genome	GCA_013423765.1	PRJNA645214
Bacillus_pumilus ZB201701	3.6	3707	Complete Genome	GCA_004006455.1	PRJNA471729
Bacillus_altitudinis GR8	3.7	3785	Complete Genome	GCA_001191605.1	PRJNA254770
Bacillus_anthracis Ames-Ancestor-A2084	5.5	5743	Complete Genome	GCA_000008445.1	PRJNA10784
Bacillus cereus BC33	5.5	5617	Complete Genome	GCA_018309165.1	PRJNA719349
Bacillus licheniformis SCDB-14	4.3	4459	Complete Genome	GCA_002074095.1	PRJNA293170
Bacillus safensis PgKB20	3.8	3840	Complete Genome	GCA_008244765.1	PRJNA560751
Bacillus subtilis 168	4.2	4536	Complete Genome	GCA_000009045.1	PRJNA76
Bacillus thuringiensis ATCC-10792	6.3	6405	Complete Genome	GCA_002119445.1	PRJNA383629
