# Supplementary material for: Comparative genomic analyses reveal genetic characteristics and pathogenic factors of Bacillus pumilus HM-7
Source: Front Microbiol. 2022 Nov 7;13:1008648. doi: 10.3389/fmicb.2022.1008648 (PMC9677121; doi:10.3389/fmicb.2022.1008648)
Supplement: Supplementary Table 2 — Genes presence and absence in six strains of B. pumilus. The presence of each CDS in the respective genome is listed below each labeled strain column. If a cell is blank the respective strain does not have the gene. [file Table_2.xlsx]

## Sheet: Sheet1
Table S2 Genes presence and absence in six strains of B. pumilus.
Gene	Non-unique Gene name	Annotation	No. isolates	No. sequences	Avg sequences per isolate	Genome Fragment	Order within Fragment	Accessory Fragment	Accessory Order with Fragment	QC	Min group size nuc	Max group size nuc	Avg group size nuc	C4	GR8	HM-7	MTCC-B6033	SH-B11	TUAT1
group_101		hypothetical protein	6	6	1	2	699				443	443	443	C4_00081	GR8_01172	HM-7_02235	MTCC-B6033_00185	SH-B11_00186	TUAT1_00188
fabF_1		3-oxoacyl-[acyl-carrier-protein] synthase 2	6	6	1	2	782				884	1232	1174	C4_00146	GR8_01240	HM-7_02304	MTCC-B6033_00246	SH-B11_00249	TUAT1_00264
gloC_1		Hydroxyacylglutathione hydrolase GloC	6	6	1	2	796				1127	1127	1127	C4_00157	GR8_01250	HM-7_02316	MTCC-B6033_00258	SH-B11_00260	TUAT1_00274
ybdH		putative oxidoreductase YbdH	6	6	1	2	812				920	1082	1055	C4_00170	GR8_01262	HM-7_02329	MTCC-B6033_00271	SH-B11_00273	TUAT1_00286
group_105		hypothetical protein	6	6	1	2	824				374	416	409	C4_00179	GR8_01270	HM-7_02336	MTCC-B6033_00280	SH-B11_00280	TUAT1_00294
group_106		hypothetical protein	6	6	1	2	863				965	965	965	C4_00215	GR8_01307	HM-7_02373	MTCC-B6033_00319	SH-B11_00317	TUAT1_00331
ycgJ		putative methyltransferase YcgJ	6	6	1	2	924				773	773	773	C4_00269	GR8_01361	HM-7_02430	MTCC-B6033_00370	SH-B11_00371	TUAT1_00386
srfAA		Surfactin synthase subunit 1	6	6	1	2	949				10715	10715	10715	C4_00294	GR8_01386	HM-7_02455	MTCC-B6033_00395	SH-B11_00396	TUAT1_00411
srfAB		Surfactin synthase subunit 2	6	6	1	2	950				10694	10694	10694	C4_00295	GR8_01387	HM-7_02456	MTCC-B6033_00396	SH-B11_00397	TUAT1_00412
srfAD		Surfactin synthase thioesterase subunit	6	6	1	2	954				740	740	740	C4_00299	GR8_01391	HM-7_02460	MTCC-B6033_00400	SH-B11_00401	TUAT1_00416
group_112		hypothetical protein	6	6	1	2	1011				266	266	266	C4_00351	GR8_01445	HM-7_02515	MTCC-B6033_00449	SH-B11_00453	TUAT1_00474
kipA		KipI antagonist	6	6	1	2	1021				1004	1004	1004	C4_00357	GR8_01451	HM-7_02521	MTCC-B6033_00455	SH-B11_00465	TUAT1_00480
topB		DNA topoisomerase 3	6	6	1	2	1041				1850	2186	2130	C4_00373	GR8_01468	HM-7_02537	MTCC-B6033_00471	SH-B11_00483	TUAT1_00496
acpS		Holo-[acyl-carrier-protein] synthase	6	6	1	2	1080				365	365	365	C4_00408	GR8_01507	HM-7_02572	MTCC-B6033_00506	SH-B11_00519	TUAT1_00533
rlmCD_1		23S rRNA (uracil-C(5))-methyltransferase RlmCD	6	6	1	2	1285				1382	1397	1387	C4_00573	GR8_01667	HM-7_02888	MTCC-B6033_00687	SH-B11_00726	TUAT1_00707
group_121		hypothetical protein	6	6	1	2	1151				440	440	440	C4_00455	GR8_01549	HM-7_02618	MTCC-B6033_00563	SH-B11_00576	TUAT1_00580
mshD_1		Mycothiol acetyltransferase	6	6	1	2	1169				551	551	551	C4_00470	GR8_01564	HM-7_02633	MTCC-B6033_00578	SH-B11_00591	TUAT1_00595
group_124		hypothetical protein	6	6	1	2	1312				1202	1202	1202	C4_00588	GR8_01678	HM-7_02901	MTCC-B6033_00699	SH-B11_00739	TUAT1_00720
group_126		hypothetical protein	6	6	1	2	1388				332	332	332	C4_00657	GR8_01746	HM-7_02968	MTCC-B6033_00770	SH-B11_00808	TUAT1_00788
group_127		hypothetical protein	6	6	1	2	1392				377	377	377	C4_00662	GR8_01750	HM-7_02972	MTCC-B6033_00774	SH-B11_00811	TUAT1_00792
group_129		hypothetical protein	6	6	1	2	1425				467	830	692	C4_00683	GR8_01771	HM-7_02994	MTCC-B6033_00802	SH-B11_00832	TUAT1_00810
group_13		hypothetical protein	6	6	1	2	1352				431	3215	2619	C4_00624	GR8_01714	HM-7_02936	MTCC-B6033_00739	SH-B11_00776	TUAT1_00757
group_130		hypothetical protein	6	6	1	2	1434				353	353	353	C4_00690	GR8_01780	HM-7_03001	MTCC-B6033_00811	SH-B11_00841	TUAT1_00819
btr_1		HTH-type transcriptional activator Btr	6	6	1	2	1448				1604	1604	1604	C4_00700	GR8_01790	HM-7_03011	MTCC-B6033_00820	SH-B11_00850	TUAT1_00828
pspB		Putative phosphoserine phosphatase 2	6	6	1	2	1514				545	545	545	C4_00772	GR8_01864	HM-7_03085	MTCC-B6033_00895	SH-B11_00924	TUAT1_00904
group_133		hypothetical protein	6	6	1	2	1517				689	689	689	C4_00775	GR8_01867	HM-7_03087	MTCC-B6033_00898	SH-B11_00927	TUAT1_00907
group_134		hypothetical protein	6	6	1	2	1551				299	380	362	C4_00805	GR8_01897	HM-7_03117	MTCC-B6033_00924	SH-B11_00958	TUAT1_00937
group_135		hypothetical protein	6	6	1	2	1560				341	341	341	C4_00814	GR8_01906	HM-7_03126	MTCC-B6033_00933	SH-B11_00967	TUAT1_00946
hmp		Flavohemoprotein	6	6	1	2	1579				1199	1199	1199	C4_00833	GR8_01925	HM-7_03145	MTCC-B6033_00952	SH-B11_00986	TUAT1_00965
crcB_2		Putative fluoride ion transporter CrcB	6	6	1	2	1593				395	401	400	C4_00847	GR8_01939	HM-7_03159	MTCC-B6033_00966	SH-B11_00999	TUAT1_00979
glpQ_2		Glycerophosphodiester phosphodiesterase	6	6	1	2	1594				716	716	716	C4_00848	GR8_01940	HM-7_03160	MTCC-B6033_00967	SH-B11_01000	TUAT1_00980
smc_1		Chromosome partition protein Smc	6	6	1	2	1628				2786	2786	2786	C4_00877	GR8_01970	HM-7_03189	MTCC-B6033_00994	SH-B11_01028	TUAT1_01008
pspA		Phosphoserine phosphatase 1	6	6	1	2	1662				584	584	584	C4_00911	GR8_02004	HM-7_03223	MTCC-B6033_01028	SH-B11_01063	TUAT1_01043
group_143		hypothetical protein	6	6	1	2	1741				527	527	527	C4_00952	GR8_02045	HM-7_03265	MTCC-B6033_01127	SH-B11_01104	TUAT1_01084
group_144		hypothetical protein	6	6	1	2	1757				857	857	857	C4_00968	GR8_02061	HM-7_03281	MTCC-B6033_01143	SH-B11_01120	TUAT1_01100
rluD_2		Ribosomal large subunit pseudouridine synthase D	6	6	1	2	1828				839	902	891	C4_01032	GR8_02130	HM-7_03345	MTCC-B6033_01207	SH-B11_01184	TUAT1_01164
tenI		Thiazole tautomerase	6	6	1	2	1832				602	632	622	C4_01036	GR8_02134	HM-7_03349	MTCC-B6033_01211	SH-B11_01188	TUAT1_01168
sbp		Sulfate-binding protein	6	6	1	2	1961				1031	1031	1031	C4_01113	GR8_02202	HM-7_03427	MTCC-B6033_01290	SH-B11_01260	TUAT1_01240
cysW		Sulfate transport system permease protein CysW	6	6	1	2	1963				821	869	861	C4_01115	GR8_02204	HM-7_03429	MTCC-B6033_01292	SH-B11_01262	TUAT1_01242
htrA_1		Serine protease Do-like HtrA	6	6	1	2	1980				1319	1319	1319	C4_01132	GR8_02221	HM-7_03446	MTCC-B6033_01309	SH-B11_01279	TUAT1_01259
ykfB		L-Ala-D/L-Glu epimerase	6	6	1	2	1989				1079	1079	1079	C4_01140	GR8_02230	HM-7_03454	MTCC-B6033_01317	SH-B11_01287	TUAT1_01267
group_153		hypothetical protein	6	6	1	2	1997				545	545	545	C4_01148	GR8_02238	HM-7_03462	MTCC-B6033_01325	SH-B11_01295	TUAT1_01275
group_154		hypothetical protein	6	6	1	2	2048				134	134	134	C4_01192	GR8_02282	HM-7_03506	MTCC-B6033_01371	SH-B11_01341	TUAT1_01320
kinA_1		Sporulation kinase A	6	6	1	2	2089				620	1826	1625	C4_01232	GR8_02323	HM-7_03546	MTCC-B6033_01411	SH-B11_01381	TUAT1_01361
group_157		hypothetical protein	6	6	1	2	2164				407	407	407	C4_01256	GR8_02344	HM-7_03569	MTCC-B6033_01434	SH-B11_01453	TUAT1_01384
polC_1		DNA polymerase III PolC-type	6	6	1	2	2421				3263	4313	4138	C4_01503	GR8_02592	HM-7_03816	MTCC-B6033_01683	SH-B11_01700	TUAT1_01630
group_160		hypothetical protein	6	6	1	2	2482				401	401	401	C4_01560	GR8_02649	HM-7_03872	MTCC-B6033_01741	SH-B11_01759	TUAT1_01687
group_165		hypothetical protein	6	6	1	2	2558				1964	1994	1989	C4_01620	GR8_02716	HM-7_03936	MTCC-B6033_01803	SH-B11_01816	TUAT1_01751
group_166		hypothetical protein	6	6	1	2	2601				713	716	713	C4_01662	GR8_02755	HM-7_03979	MTCC-B6033_01842	SH-B11_01855	TUAT1_01791
yngG		Hydroxymethylglutaryl-CoA lyase YngG	6	6	1	2	2667				818	905	876	C4_01719	GR8_02816	HM-7_04036	MTCC-B6033_01903	SH-B11_01912	TUAT1_01842
bmrR_2		Multidrug-efflux transporter 1 regulator	6	6	1	2	2710				821	821	821	C4_01759	GR8_02855	HM-7_04075	MTCC-B6033_01942	SH-B11_01950	TUAT1_01881
group_172		hypothetical protein	6	6	1	2	2747				137	140	138	C4_01795	GR8_02892	HM-7_04112	MTCC-B6033_01978	SH-B11_01986	TUAT1_01918
odhA		2-oxoglutarate dehydrogenase E1 component	6	6	1	2	2756				1190	2834	2560	C4_01802	GR8_02899	HM-7_04119	MTCC-B6033_01987	SH-B11_01994	TUAT1_01926
pseB		UDP-N-acetylglucosamine 4,6-dehydratase (inverting)	6	6	1	2	3008				593	1028	955	C4_01838	GR8_02935	HM-7_00212	MTCC-B6033_02023	SH-B11_02030	TUAT1_01962
group_177		hypothetical protein	6	6	1	2	3033				824	1139	1086	C4_01861	GR8_02958	HM-7_00235	MTCC-B6033_02046	SH-B11_02053	TUAT1_01985
group_181		hypothetical protein	6	6	1	2	3048				110	110	110	C4_01875	GR8_02972	HM-7_00249	MTCC-B6033_02060	SH-B11_02069	TUAT1_02000
comR		HTH-type transcriptional repressor ComR	6	6	1	2	3179				581	581	581	C4_02002	GR8_03099	HM-7_00376	MTCC-B6033_02186	SH-B11_02196	TUAT1_02129
ynfM		putative transporter	6	6	1	2	3180				1262	1265	1262	C4_02003	GR8_03100	HM-7_00377	MTCC-B6033_02187	SH-B11_02197	TUAT1_02130
group_184		hypothetical protein	6	6	1	2	3218				344	344	344	C4_02040	GR8_03138	HM-7_00415	MTCC-B6033_02225	SH-B11_02235	TUAT1_02168
glcU		putative glucose uptake protein GlcU	6	6	1	2	3245				845	1040	935	C4_02062	GR8_03160	HM-7_00437	MTCC-B6033_02248	SH-B11_02260	TUAT1_02190
group_188		hypothetical protein	6	6	1	2	3318				326	326	326	C4_02135	GR8_03232	HM-7_00510	MTCC-B6033_02320	SH-B11_02332	TUAT1_02262
gspF		Putative type II secretion system protein F	6	6	1	2	3334				932	1040	1004	C4_02142	GR8_03239	HM-7_00517	MTCC-B6033_02327	SH-B11_02339	TUAT1_02269
comEC		ComE operon protein 3	6	6	1	2	3425				2357	2357	2357	C4_02229	GR8_03326	HM-7_00604	MTCC-B6033_02414	SH-B11_02427	TUAT1_02356
pdaC_1		Peptidoglycan-N-acetylmuramic acid deacetylase PdaC	6	6	1	2	3441				740	740	740	C4_02243	GR8_03340	HM-7_00618	MTCC-B6033_02428	SH-B11_02441	TUAT1_02370
araR		Arabinose metabolism transcriptional repressor	6	6	1	2	5493				1088	1112	1104	C4_02274	GR8_03363	HM-7_00648	MTCC-B6033_02459	SH-B11_02534	TUAT1_02400
mprA		Transcriptional repressor MprA	6	6	1	2	5491				449	449	449	C4_02276	GR8_03365	HM-7_00650	MTCC-B6033_02461	SH-B11_02536	TUAT1_02402
ydbM		Putative acyl-CoA dehydrogenase YdbM	6	6	1	2	5467				1169	1169	1169	C4_02289	GR8_03384	HM-7_00670	MTCC-B6033_02479	SH-B11_02548	TUAT1_02421
bioY_1		putative biotin transporter BioY	6	6	1	2	5421				566	566	566	C4_02322	GR8_03420	HM-7_00706	MTCC-B6033_02512	SH-B11_02584	TUAT1_02457
nadB		L-aspartate oxidase	6	6	1	2	5365				1571	1589	1577	C4_02374	GR8_03471	HM-7_00757	MTCC-B6033_02563	SH-B11_02635	TUAT1_02508
nifS		Putative cysteine desulfurase NifS	6	6	1	2	5364				1142	1142	1142	C4_02375	GR8_03472	HM-7_00758	MTCC-B6033_02564	SH-B11_02636	TUAT1_02509
dltA		D-alanine--poly(phosphoribitol) ligase subunit 1	6	6	1	2	5311				1505	1505	1505	C4_02429	GR8_03523	HM-7_00812	MTCC-B6033_02615	SH-B11_02690	TUAT1_02560
birA_2		Bifunctional ligase/repressor BirA	6	6	1	2	5234				716	716	716	C4_02444	GR8_03542	HM-7_00828	MTCC-B6033_02636	SH-B11_02710	TUAT1_02631
group_204		Putative TrmH family tRNA/rRNA methyltransferase	6	6	1	2	5209				743	743	743	C4_02468	GR8_03566	HM-7_00852	MTCC-B6033_02660	SH-B11_02734	TUAT1_02655
coaE		Dephospho-CoA kinase	6	6	1	2	5185				605	605	605	C4_02489	GR8_03587	HM-7_00873	MTCC-B6033_02682	SH-B11_02758	TUAT1_02676
graR		Response regulator protein GraR	6	6	1	2	5140				689	776	703	C4_02532	GR8_03631	HM-7_00916	MTCC-B6033_02726	SH-B11_02802	TUAT1_02720
group_207	slyA	putative HTH-type transcriptional regulator	6	6	1	2	5130				431	434	431	C4_02538	GR8_03639	HM-7_00924	MTCC-B6033_02732	SH-B11_02810	TUAT1_02726
iscS_2		Cysteine desulfurase IscS	6	6	1	2	5123				1142	1142	1142	C4_02543	GR8_03646	HM-7_00930	MTCC-B6033_02739	SH-B11_02817	TUAT1_02732
msrC		Free methionine-R-sulfoxide reductase	6	6	1	2	5115				500	500	500	C4_02549	GR8_03652	HM-7_00936	MTCC-B6033_02745	SH-B11_02823	TUAT1_02738
rsmH_2		Ribosomal RNA small subunit methyltransferase H	6	6	1	2	5034				578	578	578	C4_02627	GR8_03724	HM-7_01009	MTCC-B6033_02820	SH-B11_02897	TUAT1_02811
group_213		hypothetical protein	6	6	1	2	5009				437	437	437	C4_02652	GR8_03749	HM-7_01034	MTCC-B6033_02845	SH-B11_02922	TUAT1_02836
group_216		hypothetical protein	6	6	1	2	4911				248	248	248	C4_02751	GR8_00067	HM-7_01143	MTCC-B6033_02958	SH-B11_03035	TUAT1_02945
pgi		Glucose-6-phosphate isomerase	6	6	1	2	4901				1100	1355	1312	C4_02760	GR8_00076	HM-7_01152	MTCC-B6033_02969	SH-B11_03044	TUAT1_02954
kapB		Kinase-associated lipoprotein B	6	6	1	2	4887				392	392	392	C4_02772	GR8_00088	HM-7_01164	MTCC-B6033_02981	SH-B11_03056	TUAT1_02966
group_220		hypothetical protein	6	6	1	2	4787				719	743	723	C4_02862	GR8_00179	HM-7_01255	MTCC-B6033_03072	SH-B11_03149	TUAT1_03059
gerAA_3		Spore germination protein A1	6	6	1	2	4724				1424	1424	1424	C4_02910	GR8_00228	HM-7_01304	MTCC-B6033_03122	SH-B11_03195	TUAT1_03110
hmuV		Hemin import ATP-binding protein HmuV	6	6	1	2	4701				1286	1286	1286	C4_02930	GR8_00247	HM-7_01323	MTCC-B6033_03141	SH-B11_03206	TUAT1_03129
uxaB		Altronate oxidoreductase	6	6	1	2	4696				1451	1451	1451	C4_02935	GR8_00252	HM-7_01328	MTCC-B6033_03146	SH-B11_03211	TUAT1_03134
modA		Molybdate-binding periplasmic protein	6	6	1	2	4682				776	776	776	C4_02949	GR8_00266	HM-7_01342	MTCC-B6033_03160	SH-B11_03225	TUAT1_03148
gmuE_2		Putative fructokinase	6	6	1	2	4679				869	869	869	C4_02952	GR8_00269	HM-7_01345	MTCC-B6033_03163	SH-B11_03228	TUAT1_03151
group_230		hypothetical protein	6	6	1	2	4627				1397	1397	1397	C4_02997	GR8_00314	HM-7_01390	MTCC-B6033_03207	SH-B11_03272	TUAT1_03196
nikE		Nickel import ATP-binding protein NikE	6	6	1	2	4609				815	815	815	C4_03013	GR8_00330	HM-7_01406	MTCC-B6033_03223	SH-B11_03288	TUAT1_03212
ddpD		putative D,D-dipeptide transport ATP-binding protein DdpD	6	6	1	2	4608				806	806	806	C4_03014	GR8_00331	HM-7_01407	MTCC-B6033_03224	SH-B11_03289	TUAT1_03213
hisD		Histidinol dehydrogenase	6	6	1	2	4543				1289	1289	1289	C4_03067	GR8_00389	HM-7_01461	MTCC-B6033_03278	SH-B11_03344	TUAT1_03262
group_234		hypothetical protein	6	6	1	2	4479				467	686	560	C4_03130	GR8_00453	HM-7_01524	MTCC-B6033_03340	SH-B11_03406	TUAT1_03325
comFA		ComF operon protein 1	6	6	1	2	4477				1127	1361	1322	C4_03132	GR8_00455	HM-7_01526	MTCC-B6033_03342	SH-B11_03408	TUAT1_03327
lytC_2		N-acetylmuramoyl-L-alanine amidase LytC	6	6	1	2	4459				1490	1490	1490	C4_03149	GR8_00472	HM-7_01544	MTCC-B6033_03359	SH-B11_03425	TUAT1_03344
alsB		D-allose-binding periplasmic protein	6	6	1	2	4424				1001	1001	1001	C4_03171	GR8_00494	HM-7_01566	MTCC-B6033_03385	SH-B11_03451	TUAT1_03366
group_238		hypothetical protein	6	6	1	2	4402				1142	1142	1142	C4_03192	GR8_00515	HM-7_01587	MTCC-B6033_03406	SH-B11_03472	TUAT1_03387
dctM		C4-dicarboxylate TRAP transporter large permease protein DctM	6	6	1	2	4228				1334	1334	1334	C4_03332	GR8_00665	HM-7_01727	MTCC-B6033_03549	SH-B11_03624	TUAT1_03535
bacF_2		Transaminase BacF	6	6	1	2	4208				1193	1193	1193	C4_03353	GR8_00678	HM-7_01740	MTCC-B6033_03562	SH-B11_03638	TUAT1_03548
ypeA_2		Acetyltransferase YpeA	6	6	1	2	4198				875	875	875	C4_03362	GR8_00687	HM-7_01749	MTCC-B6033_03571	SH-B11_03647	TUAT1_03557
thiM		Hydroxyethylthiazole kinase	6	6	1	2	4145				824	824	824	C4_03412	GR8_00734	HM-7_01797	MTCC-B6033_03618	SH-B11_03703	TUAT1_03604
uxuA		Mannonate dehydratase	6	6	1	2	4085				197	1064	919	C4_03467	GR8_00790	HM-7_01852	MTCC-B6033_03673	SH-B11_03758	TUAT1_03659
tenA_2		Aminopyrimidine aminohydrolase	6	6	1	2	4046				686	686	686	C4_03503	GR8_00825	HM-7_01885	MTCC-B6033_03711	SH-B11_03794	TUAT1_03692
ycnE		Putative monooxygenase YcnE	6	6	1	2	4039				293	293	293	C4_03510	GR8_00832	HM-7_01892	MTCC-B6033_03718	SH-B11_03801	TUAT1_03699
rfnT		Riboflavin transporter RfnT	6	6	1	2	4027				1265	1271	1269	C4_03520	GR8_00842	HM-7_01902	MTCC-B6033_03728	SH-B11_03811	TUAT1_03709
rebM_2		Demethylrebeccamycin-D-glucose O-methyltransferase	6	6	1	2	4025				707	707	707	C4_03522	GR8_00844	HM-7_01904	MTCC-B6033_03730	SH-B11_03813	TUAT1_03711
ypfD		30S ribosomal protein S1	6	6	1	2	3135				341	1151	976	C4_01960	GR8_03057	HM-7_00333	MTCC-B6033_02144	SH-B11_02154	TUAT1_02087
group_250		hypothetical protein	6	6	1	2	4017				953	1103	1030	C4_03529	GR8_00851	HM-7_01911	MTCC-B6033_03739	SH-B11_03820	TUAT1_03718
garK		Glycerate 2-kinase	6	6	1	2	3990				1139	1139	1139	C4_03552	GR8_00874	HM-7_01934	MTCC-B6033_03770	SH-B11_03849	TUAT1_03741
speA_1		Arginine decarboxylase	6	6	1	2	3817				1406	1406	1406	C4_03704	GR8_01028	HM-7_02090	MTCC-B6033_00040	SH-B11_00042	TUAT1_00040
group_258		hypothetical protein	6	6	1	2	3799				278	278	278	C4_03722	GR8_01046	HM-7_02108	MTCC-B6033_00058	SH-B11_00060	TUAT1_00058
mazG		Nucleoside triphosphate pyrophosphohydrolase/pyrophosphatase MazG	6	6	1	2	3786				887	1484	1384	C4_03735	GR8_01059	HM-7_02121	MTCC-B6033_00072	SH-B11_00073	TUAT1_00071
group_261		hypothetical protein	6	6	1	2	4777				932	938	934	C4_02872	GR8_00189	HM-7_01265	MTCC-B6033_03083	SH-B11_03159	TUAT1_03069
phrA		Deoxyribodipyrimidine photo-lyase	6	6	1	2	2241				1433	1436	1433	C4_01325	GR8_02414	HM-7_03638	MTCC-B6033_01505	SH-B11_01522	TUAT1_01453
yecD_1		Isochorismatase family protein YecD	6	6	1	2	5111				569	569	569	C4_02552	GR8_03655	HM-7_00939	MTCC-B6033_02748	SH-B11_02826	TUAT1_02741
radA		DNA repair protein RadA	6	6	1	2	3757				1283	1319	1301	C4_00005	GR8_01105	HM-7_02167	MTCC-B6033_00118	SH-B11_00119	TUAT1_00117
cysE_1		Serine acetyltransferase	6	6	1	2	3751				842	842	842	C4_00011	GR8_01111	HM-7_02173	MTCC-B6033_00124	SH-B11_00125	TUAT1_00123
menH_1		2-succinyl-6-hydroxy-2,4-cyclohexadiene-1-carboxylate synthase	6	6	1	2	3731				959	959	959	C4_00031	GR8_01131	HM-7_02193	MTCC-B6033_00144	SH-B11_00145	TUAT1_00143
murQ		N-acetylmuramic acid 6-phosphate etherase	6	6	1	2	715				911	911	911	C4_00098	GR8_01190	HM-7_02253	MTCC-B6033_00203	SH-B11_00204	TUAT1_00208
racA		Chromosome-anchoring protein RacA	6	6	1	2	4317				551	551	551	C4_03275	GR8_00598	HM-7_01670	MTCC-B6033_03483	SH-B11_03550	TUAT1_03470
yxdL		ABC transporter ATP-binding protein YxdL	6	6	1	2	732				719	719	719	C4_00115	GR8_01207	HM-7_02270	MTCC-B6033_00220	SH-B11_00221	TUAT1_00225
hipB		Antitoxin HipB	6	6	1	2	759				215	218	217	C4_00133	GR8_01228	HM-7_02292	MTCC-B6033_00234	SH-B11_00232	TUAT1_00250
marA		Multiple antibiotic resistance protein MarA	6	6	1	2	762				887	890	889	C4_00136	GR8_01231	HM-7_02295	MTCC-B6033_00237	SH-B11_00235	TUAT1_00253
yifK		putative transport protein YifK	6	6	1	2	769				1388	1388	1388	C4_00140	GR8_01235	HM-7_02299	MTCC-B6033_00241	SH-B11_00239	TUAT1_00257
group_297		hypothetical protein	6	6	1	2	790				464	464	464	C4_00152	GR8_01245	HM-7_02311	MTCC-B6033_00253	SH-B11_00255	TUAT1_00269
group_299		hypothetical protein	6	6	1	2	799				776	776	776	C4_00159	GR8_01252	HM-7_02318	MTCC-B6033_00260	SH-B11_00262	TUAT1_00276
group_30		hypothetical protein	6	6	1	2	4005				1142	1487	1427	C4_03537	GR8_00859	HM-7_01919	MTCC-B6033_03749	SH-B11_03828	TUAT1_03726
group_300		hypothetical protein	6	6	1	2	804				767	767	767	C4_00164	GR8_01257	HM-7_02323	MTCC-B6033_00265	SH-B11_00267	TUAT1_00281
yveA		Aspartate-proton symporter	6	6	1	2	814				1553	1619	1608	C4_00172	GR8_01264	HM-7_02331	MTCC-B6033_00273	SH-B11_00275	TUAT1_00288
pyrG		CTP synthase	6	6	1	2	4305				1607	1607	1607	C4_03287	GR8_00610	HM-7_01682	MTCC-B6033_03495	SH-B11_03562	TUAT1_03482
petC		Cytochrome b6-f complex iron-sulfur subunit	6	6	1	2	3101				506	506	506	C4_01925	GR8_03023	HM-7_00299	MTCC-B6033_02110	SH-B11_02120	TUAT1_02052
group_3017		hypothetical protein	6	6	1	2	2578				125	125	125	C4_01640	GR8_02736	HM-7_03956	MTCC-B6033_01823	SH-B11_01836	TUAT1_01771
rpsJ		30S ribosomal protein S10	6	6	1	2	3730				308	308	308	C4_00032	GR8_01132	HM-7_02194	MTCC-B6033_00145	SH-B11_00146	TUAT1_00144
group_3019		hypothetical protein	6	6	1	2	4830				320	320	320	C4_02825	GR8_00141	HM-7_01217	MTCC-B6033_03034	SH-B11_03110	TUAT1_03019
azoR2_1		FMN-dependent NADH-azoreductase 2	6	6	1	2	1023				635	635	635	C4_00359	GR8_01453	HM-7_02523	MTCC-B6033_00457	SH-B11_00467	TUAT1_00482
rbfA		Ribosome-binding factor A	6	6	1	2	2432				350	350	350	C4_01514	GR8_02603	HM-7_03827	MTCC-B6033_01695	SH-B11_01711	TUAT1_01641
group_3022		hypothetical protein	6	6	1	2	1468				110	110	110	C4_00717	GR8_01807	HM-7_03028	MTCC-B6033_00837	SH-B11_00867	TUAT1_00845
spoVS		Stage V sporulation protein S	6	6	1	2	2468				260	260	260	C4_01548	GR8_02637	HM-7_03861	MTCC-B6033_01729	SH-B11_01745	TUAT1_01675
group_3024		hypothetical protein	6	6	1	2	2787				680	680	680	C4_01828	GR8_02925	HM-7_04145	MTCC-B6033_02013	SH-B11_02020	TUAT1_01952
group_3025		hypothetical protein	6	6	1	2	3019				251	251	251	C4_01849	GR8_02946	HM-7_00223	MTCC-B6033_02034	SH-B11_02041	TUAT1_01973
ylbP		putative N-acetyltransferase YlbP	6	6	1	2	2266				479	479	479	C4_01350	GR8_02439	HM-7_03663	MTCC-B6033_01530	SH-B11_01547	TUAT1_01478
gcvH		Glycine cleavage system H protein	6	6	1	2	4745				383	383	383	C4_02890	GR8_00209	HM-7_01284	MTCC-B6033_03102	SH-B11_03176	TUAT1_03091
rpsD		30S ribosomal protein S4	6	6	1	2	5114				602	602	602	C4_02550	GR8_03653	HM-7_00937	MTCC-B6033_02746	SH-B11_02824	TUAT1_02739
degQ		Degradation enzyme regulation protein DegQ	6	6	1	2	4858				140	140	140	C4_02798	GR8_00114	HM-7_01190	MTCC-B6033_03007	SH-B11_03083	TUAT1_02992
mmuM		Homocysteine S-methyltransferase	6	6	1	2	837				947	947	947	C4_00190	GR8_01281	HM-7_02347	MTCC-B6033_00293	SH-B11_00291	TUAT1_00305
ftsZ		Cell division protein FtsZ	6	6	1	2	2286				1145	1145	1145	C4_01370	GR8_02459	HM-7_03683	MTCC-B6033_01550	SH-B11_01567	TUAT1_01497
sigE		RNA polymerase sigma-E factor	6	6	1	2	2289				719	719	719	C4_01373	GR8_02462	HM-7_03686	MTCC-B6033_01553	SH-B11_01570	TUAT1_01500
yqfL		Putative pyruvate, phosphate dikinase regulatory protein	6	6	1	2	3388				821	821	821	C4_02194	GR8_03291	HM-7_00569	MTCC-B6033_02379	SH-B11_02391	TUAT1_02321
group_3033		hypothetical protein	6	6	1	2	4523				230	230	230	C4_03087	GR8_00410	HM-7_01481	MTCC-B6033_03297	SH-B11_03363	TUAT1_03282
group_3034		hypothetical protein	6	6	1	2	3800				257	257	257	C4_03721	GR8_01045	HM-7_02107	MTCC-B6033_00057	SH-B11_00059	TUAT1_00057
yidD		Putative membrane protein insertion efficiency factor	6	6	1	2	5007				224	224	224	C4_02654	GR8_03751	HM-7_01036	MTCC-B6033_02847	SH-B11_02924	TUAT1_02838
group_3036		hypothetical protein	6	6	1	2	1371				503	503	503	C4_00642	GR8_01731	HM-7_02953	MTCC-B6033_00755	SH-B11_00793	TUAT1_00773
sigH		RNA polymerase sigma-H factor	6	6	1	2	3746				656	656	656	C4_00016	GR8_01116	HM-7_02178	MTCC-B6033_00129	SH-B11_00130	TUAT1_00128
pta_1		Phosphate acetyltransferase	6	6	1	2	3268				893	893	893	C4_02085	GR8_03183	HM-7_00460	MTCC-B6033_02271	SH-B11_02283	TUAT1_02213
trmL		tRNA (cytidine(34)-2'-O)-methyltransferase	6	6	1	2	1541				473	473	473	C4_00796	GR8_01888	HM-7_03108	MTCC-B6033_00915	SH-B11_00949	TUAT1_00928
group_304		hypothetical protein	6	6	1	2	838				830	857	834	C4_00191	GR8_01282	HM-7_02348	MTCC-B6033_00294	SH-B11_00292	TUAT1_00306
group_3040		Alkaline shock protein 23	6	6	1	2	2345				362	362	362	C4_01428	GR8_02517	HM-7_03741	MTCC-B6033_01608	SH-B11_01625	TUAT1_01555
group_3041		hypothetical protein	6	6	1	2	2208				203	203	203	C4_01297	GR8_02386	HM-7_03610	MTCC-B6033_01477	SH-B11_01494	TUAT1_01425
ohrR_2		Organic hydroperoxide resistance transcriptional regulator	6	6	1	2	4685				428	428	428	C4_02946	GR8_00263	HM-7_01339	MTCC-B6033_03157	SH-B11_03222	TUAT1_03145
sigI		RNA polymerase sigma factor SigI	6	6	1	2	2032				746	746	746	C4_01180	GR8_02270	HM-7_03494	MTCC-B6033_01359	SH-B11_01329	TUAT1_01308
coaX		Type III pantothenate kinase	6	6	1	2	3774				788	788	788	C4_03749	GR8_01073	HM-7_02135	MTCC-B6033_00086	SH-B11_00087	TUAT1_00085
group_3045		hypothetical protein	6	6	1	2	3294				206	206	206	C4_02111	GR8_03208	HM-7_00486	MTCC-B6033_02296	SH-B11_02308	TUAT1_02238
eno		Enolase	6	6	1	2	4622				1292	1292	1292	C4_03000	GR8_00317	HM-7_01393	MTCC-B6033_03210	SH-B11_03275	TUAT1_03199
rpsR		30S ribosomal protein S18	6	6	1	2	3865				239	239	239	C4_03655	GR8_00970	HM-7_02031	MTCC-B6033_03874	SH-B11_03950	TUAT1_03835
spoVK		Stage V sporulation protein K	6	6	1	2	2503				959	959	959	C4_01581	GR8_02670	HM-7_03893	MTCC-B6033_01762	SH-B11_01780	TUAT1_01708
group_3049		hypothetical protein	6	6	1	2	1332				233	233	233	C4_00606	GR8_01696	HM-7_02918	MTCC-B6033_00717	SH-B11_00757	TUAT1_00739
group_305		hypothetical protein	6	6	1	2	839				317	317	317	C4_00192	GR8_01283	HM-7_02350	MTCC-B6033_00295	SH-B11_00293	TUAT1_00307
group_3050		hypothetical protein	6	6	1	2	2253				248	248	248	C4_01337	GR8_02426	HM-7_03650	MTCC-B6033_01517	SH-B11_01534	TUAT1_01465
glnA		Glutamine synthetase	6	6	1	2	2511				1334	1334	1334	C4_01585	GR8_02674	HM-7_03897	MTCC-B6033_01766	SH-B11_01784	TUAT1_01712
splB		Spore photoproduct lyase	6	6	1	2	2083				1028	1028	1028	C4_01226	GR8_02317	HM-7_03540	MTCC-B6033_01405	SH-B11_01375	TUAT1_01355
prsW		Protease PrsW	6	6	1	2	3141				656	656	656	C4_01966	GR8_03063	HM-7_00339	MTCC-B6033_02150	SH-B11_02160	TUAT1_02093
csrA		Carbon storage regulator	6	6	1	2	4487				224	224	224	C4_03122	GR8_00445	HM-7_01516	MTCC-B6033_03332	SH-B11_03398	TUAT1_03317
group_3055		hypothetical protein	6	6	1	2	4191				371	371	371	C4_03369	GR8_00694	HM-7_01756	MTCC-B6033_03578	SH-B11_03654	TUAT1_03564
sigD		RNA polymerase sigma-D factor	6	6	1	2	2410				767	767	767	C4_01492	GR8_02581	HM-7_03805	MTCC-B6033_01672	SH-B11_01689	TUAT1_01619
groS		10 kDa chaperonin	6	6	1	2	1194				284	284	284	C4_00499	GR8_01593	HM-7_02664	MTCC-B6033_00607	SH-B11_00619	TUAT1_00624
degR		Regulatory protein DegR	6	6	1	2	3041				182	182	182	C4_01869	GR8_02966	HM-7_00243	MTCC-B6033_02054	SH-B11_02063	TUAT1_01994
group_3059		hypothetical protein	6	6	1	2	4270				518	518	518	C4_03310	GR8_00633	HM-7_01705	MTCC-B6033_03519	SH-B11_03592	TUAT1_03505
group_306		hypothetical protein	6	6	1	2	840				587	587	587	C4_00193	GR8_01284	HM-7_02351	MTCC-B6033_00296	SH-B11_00294	TUAT1_00308
mgsR_1		Regulatory protein MgsR	6	6	1	2	3337				380	380	380	C4_02146	GR8_03243	HM-7_00521	MTCC-B6033_02331	SH-B11_02343	TUAT1_02273
group_3061		hypothetical protein	6	6	1	2	4894				500	500	500	C4_02766	GR8_00082	HM-7_01158	MTCC-B6033_02975	SH-B11_03050	TUAT1_02960
fabZ		3-hydroxyacyl-[acyl-carrier-protein] dehydratase FabZ	6	6	1	2	4377				434	434	434	C4_03215	GR8_00538	HM-7_01610	MTCC-B6033_03429	SH-B11_03495	TUAT1_03410
ilvH		Putative acetolactate synthase small subunit	6	6	1	2	5319				518	518	518	C4_02421	GR8_03515	HM-7_00804	MTCC-B6033_02607	SH-B11_02682	TUAT1_02552
minD		Septum site-determining protein MinD	6	6	1	2	5353				803	803	803	C4_02386	GR8_03483	HM-7_00769	MTCC-B6033_02575	SH-B11_02647	TUAT1_02520
rpsH		30S ribosomal protein S8	6	6	1	2	3715				398	398	398	C4_00047	GR8_01147	HM-7_02209	MTCC-B6033_00160	SH-B11_00161	TUAT1_00159
tcyA		L-cystine-binding protein TcyA	6	6	1	2	969				815	815	815	C4_00310	GR8_01405	HM-7_02475	MTCC-B6033_00409	SH-B11_00412	TUAT1_00433
cspB		Cold shock protein CspB	6	6	1	2	1549				200	200	200	C4_00803	GR8_01895	HM-7_03115	MTCC-B6033_00922	SH-B11_00956	TUAT1_00935
pomA		Chemotaxis protein PomA	6	6	1	2	2060				794	794	794	C4_01204	GR8_02294	HM-7_03518	MTCC-B6033_01383	SH-B11_01353	TUAT1_01332
sspN		Small, acid-soluble spore protein N	6	6	1	2	2579				146	146	146	C4_01641	GR8_02737	HM-7_03957	MTCC-B6033_01824	SH-B11_01837	TUAT1_01772
group_307		hypothetical protein	6	6	1	2	841				119	170	161	C4_00194	GR8_01285	HM-7_02352	MTCC-B6033_00297	SH-B11_00295	TUAT1_00309
slrA		Transcriptional regulator SlrA	6	6	1	2	4156				140	140	140	C4_03400	GR8_00725	HM-7_01788	MTCC-B6033_03609	SH-B11_03688	TUAT1_03595
gerPA_2		putative spore germination protein GerPA	6	6	1	2	4850				221	221	221	C4_02806	GR8_00122	HM-7_01198	MTCC-B6033_03015	SH-B11_03091	TUAT1_03000
ahpC		Alkyl hydroperoxide reductase subunit C	6	6	1	2	2172				542	542	542	C4_01264	GR8_02352	HM-7_03577	MTCC-B6033_01443	SH-B11_01461	TUAT1_01392
cotE		Spore coat protein E	6	6	1	2	2475				545	545	545	C4_01555	GR8_02644	HM-7_03867	MTCC-B6033_01736	SH-B11_01752	TUAT1_01682
group_3074		hypothetical protein	6	6	1	2	5361				443	443	443	C4_02378	GR8_03475	HM-7_00761	MTCC-B6033_02567	SH-B11_02639	TUAT1_02512
rplE		50S ribosomal protein L5	6	6	1	2	3717				539	539	539	C4_00045	GR8_01145	HM-7_02207	MTCC-B6033_00158	SH-B11_00159	TUAT1_00157
lepA		Elongation factor 4	6	6	1	2	3418				1838	1838	1838	C4_02222	GR8_03319	HM-7_00597	MTCC-B6033_02407	SH-B11_02420	TUAT1_02349
group_3077		hypothetical protein	6	6	1	2	2441				272	272	272	C4_01522	GR8_02611	HM-7_03835	MTCC-B6033_01703	SH-B11_01719	TUAT1_01649
cheR		Chemotaxis protein methyltransferase	6	6	1	2	3117				776	776	776	C4_01941	GR8_03039	HM-7_00315	MTCC-B6033_02126	SH-B11_02136	TUAT1_02068
abh_3		Putative transition state regulator Abh	6	6	1	2	4644				290	290	290	C4_02982	GR8_00299	HM-7_01375	MTCC-B6033_03192	SH-B11_03257	TUAT1_03181
group_3080		hypothetical protein	6	6	1	2	3133				131	131	131	C4_01957	GR8_03055	HM-7_00331	MTCC-B6033_02142	SH-B11_02152	TUAT1_02084
group_3081		hypothetical protein	6	6	1	2	2256				272	272	272	C4_01340	GR8_02429	HM-7_03653	MTCC-B6033_01520	SH-B11_01537	TUAT1_01468
group_3082		hypothetical protein	6	6	1	2	3340				173	173	173	C4_02149	GR8_03246	HM-7_00524	MTCC-B6033_02334	SH-B11_02346	TUAT1_02276
prs		Ribose-phosphate pyrophosphokinase	6	6	1	2	3793				953	953	953	C4_03728	GR8_01052	HM-7_02114	MTCC-B6033_00064	SH-B11_00066	TUAT1_00064
group_3084		PhoH-like protein	6	6	1	2	3399				959	959	959	C4_02205	GR8_03302	HM-7_00580	MTCC-B6033_02390	SH-B11_02402	TUAT1_02332
ydbP		Thioredoxin-like protein YdbP	6	6	1	2	1070				320	320	320	C4_00399	GR8_01498	HM-7_02563	MTCC-B6033_00497	SH-B11_00510	TUAT1_00524
moaD		Molybdopterin synthase sulfur carrier subunit	6	6	1	2	2183				233	233	233	C4_01273	GR8_02361	HM-7_03586	MTCC-B6033_01452	SH-B11_01470	TUAT1_01401
group_3087		hypothetical protein	6	6	1	2	4527				386	386	386	C4_03083	GR8_00406	HM-7_01477	MTCC-B6033_03293	SH-B11_03359	TUAT1_03278
hpt		Hypoxanthine-guanine phosphoribosyltransferase	6	6	1	2	3776				539	539	539	C4_03747	GR8_01071	HM-7_02133	MTCC-B6033_00084	SH-B11_00085	TUAT1_00083
xseB		Exodeoxyribonuclease 7 small subunit	6	6	1	2	3282				260	260	260	C4_02099	GR8_03196	HM-7_00474	MTCC-B6033_02284	SH-B11_02296	TUAT1_02226
epr		Minor extracellular protease Epr	6	6	1	2	846				1631	1631	1631	C4_00199	GR8_01290	HM-7_02357	MTCC-B6033_00303	SH-B11_00300	TUAT1_00314
rpsO		30S ribosomal protein S15	6	6	1	2	2435				269	269	269	C4_01517	GR8_02606	HM-7_03830	MTCC-B6033_01698	SH-B11_01714	TUAT1_01644
yscN		putative ATP synthase YscN	6	6	1	2	2386				1316	1316	1316	C4_01468	GR8_02557	HM-7_03781	MTCC-B6033_01648	SH-B11_01665	TUAT1_01595
bfmBAB_1		2-oxoisovalerate dehydrogenase subunit beta	6	6	1	2	1971				995	995	995	C4_01123	GR8_02212	HM-7_03437	MTCC-B6033_01300	SH-B11_01270	TUAT1_01250
tatAy		Sec-independent protein translocase protein TatAy	6	6	1	2	1188				179	179	179	C4_00494	GR8_01588	HM-7_02659	MTCC-B6033_00601	SH-B11_00614	TUAT1_00619
ykuL		CBS domain-containing protein YkuL	6	6	1	2	2162				443	443	443	C4_01254	GR8_02342	HM-7_03567	MTCC-B6033_01432	SH-B11_01451	TUAT1_01382
sufU		Zinc-dependent sulfurtransferase SufU	6	6	1	2	4758				446	446	446	C4_02878	GR8_00197	HM-7_01271	MTCC-B6033_03089	SH-B11_03164	TUAT1_03079
group_3096		hypothetical protein	6	6	1	2	1768				191	191	191	C4_00979	GR8_02072	HM-7_03292	MTCC-B6033_01154	SH-B11_01131	TUAT1_01111
rplN		50S ribosomal protein L14	6	6	1	2	3719				368	368	368	C4_00043	GR8_01143	HM-7_02205	MTCC-B6033_00156	SH-B11_00157	TUAT1_00155
group_3098		hypothetical protein	6	6	1	2	4482				482	482	482	C4_03127	GR8_00450	HM-7_01521	MTCC-B6033_03337	SH-B11_03403	TUAT1_03322
yhaM		3'-5' exoribonuclease YhaM	6	6	1	2	1629				953	953	953	C4_00878	GR8_01971	HM-7_03190	MTCC-B6033_00995	SH-B11_01029	TUAT1_01009
sodA_2		Superoxide dismutase [Mn]	6	6	1	2	3364				608	608	608	C4_02170	GR8_03267	HM-7_00545	MTCC-B6033_02355	SH-B11_02367	TUAT1_02297
group_3101		hypothetical protein	6	6	1	2	2658				425	425	425	C4_01711	GR8_02807	HM-7_04029	MTCC-B6033_01894	SH-B11_01903	TUAT1_01835
clpQ		ATP-dependent protease subunit ClpQ	6	6	1	2	2377				545	545	545	C4_01459	GR8_02548	HM-7_03772	MTCC-B6033_01639	SH-B11_01656	TUAT1_01586
group_3103		hypothetical protein	6	6	1	2	3377				260	260	260	C4_02183	GR8_03280	HM-7_00558	MTCC-B6033_02368	SH-B11_02380	TUAT1_02310
pstB		Phosphate import ATP-binding protein PstB	6	6	1	2	3358				812	812	812	C4_02164	GR8_03261	HM-7_00539	MTCC-B6033_02349	SH-B11_02361	TUAT1_02291
group_3105		hypothetical protein	6	6	1	2	2238				281	281	281	C4_01322	GR8_02411	HM-7_03635	MTCC-B6033_01502	SH-B11_01519	TUAT1_01450
mrpC		Na(+)/H(+) antiporter subunit C	6	6	1	2	4869				341	341	341	C4_02788	GR8_00104	HM-7_01180	MTCC-B6033_02997	SH-B11_03073	TUAT1_02982
group_3107		hypothetical protein	6	6	1	2	4481				263	263	263	C4_03128	GR8_00451	HM-7_01522	MTCC-B6033_03338	SH-B11_03404	TUAT1_03323
group_3108		hypothetical protein	6	6	1	2	4182				254	254	254	C4_03378	GR8_00703	HM-7_01766	MTCC-B6033_03587	SH-B11_03664	TUAT1_03573
gerPA_1		putative spore germination protein GerPA	6	6	1	2	1735				221	221	221	C4_00946	GR8_02039	HM-7_03259	MTCC-B6033_01121	SH-B11_01098	TUAT1_01078
ycdF		Glucose 1-dehydrogenase 2	6	6	1	2	871				140	782	675	C4_00223	GR8_01316	HM-7_02382	MTCC-B6033_00327	SH-B11_00325	TUAT1_00340
nfuA		Fe/S biogenesis protein NfuA	6	6	1	2	4818				236	236	236	C4_02837	GR8_00153	HM-7_01229	MTCC-B6033_03046	SH-B11_03124	TUAT1_03033
gpr		Germination protease	6	6	1	2	3421				1115	1115	1115	C4_02225	GR8_03322	HM-7_00600	MTCC-B6033_02410	SH-B11_02423	TUAT1_02352
ctaE		Cytochrome c oxidase subunit 3	6	6	1	2	2246				620	620	620	C4_01330	GR8_02419	HM-7_03643	MTCC-B6033_01510	SH-B11_01527	TUAT1_01458
speH		S-adenosylmethionine decarboxylase proenzyme	6	6	1	2	5187				380	380	380	C4_02487	GR8_03585	HM-7_00871	MTCC-B6033_02680	SH-B11_02756	TUAT1_02674
group_3114		putative zinc protease	6	6	1	2	2438				1229	1229	1229	C4_01520	GR8_02609	HM-7_03833	MTCC-B6033_01701	SH-B11_01717	TUAT1_01647
group_3115		hypothetical protein	6	6	1	2	4067				179	179	179	C4_03484	GR8_00807	HM-7_01869	MTCC-B6033_03690	SH-B11_03775	TUAT1_03676
gudB		Cryptic catabolic NAD-specific glutamate dehydrogenase GudB	6	6	1	2	3143				1274	1274	1274	C4_01968	GR8_03065	HM-7_00341	MTCC-B6033_02152	SH-B11_02162	TUAT1_02095
ytrH		Sporulation membrane protein YtrH	6	6	1	2	5167				341	341	341	C4_02507	GR8_03605	HM-7_00891	MTCC-B6033_02700	SH-B11_02776	TUAT1_02694
group_3118		hypothetical protein	6	6	1	2	1632				89	89	89	C4_00881	GR8_01974	HM-7_03193	MTCC-B6033_00998	SH-B11_01032	TUAT1_01012
cysK_1		Cysteine synthase	6	6	1	2	3771				923	923	923	C4_03752	GR8_01076	HM-7_02138	MTCC-B6033_00089	SH-B11_00090	TUAT1_00088
group_312		hypothetical protein	6	6	1	2	878				1193	1193	1193	C4_00230	GR8_01323	HM-7_02389	MTCC-B6033_00334	SH-B11_00332	TUAT1_00347
ecsA_2		ABC-type transporter ATP-binding protein EcsA	6	6	1	2	1641				740	740	740	C4_00890	GR8_01983	HM-7_03202	MTCC-B6033_01007	SH-B11_01041	TUAT1_01021
group_3121		hypothetical protein	6	6	1	2	1543				1163	1163	1163	C4_00798	GR8_01890	HM-7_03110	MTCC-B6033_00917	SH-B11_00951	TUAT1_00930
mreB_2		Rod shape-determining protein MreB	6	6	1	2	5349				1019	1019	1019	C4_02390	GR8_03487	HM-7_00773	MTCC-B6033_02579	SH-B11_02651	TUAT1_02524
group_3123		Alkaline shock protein 23	6	6	1	2	3286				407	407	407	C4_02103	GR8_03200	HM-7_00478	MTCC-B6033_02288	SH-B11_02300	TUAT1_02230
rnjA		Ribonuclease J1	6	6	1	2	2204				1667	1667	1667	C4_01293	GR8_02382	HM-7_03606	MTCC-B6033_01473	SH-B11_01490	TUAT1_01421
qoxD		Quinol oxidase subunit 4	6	6	1	2	4167				380	380	380	C4_03389	GR8_00714	HM-7_01777	MTCC-B6033_03598	SH-B11_03677	TUAT1_03584
group_3126		hypothetical protein	6	6	1	2	5383				266	266	266	C4_02358	GR8_03455	HM-7_00741	MTCC-B6033_02547	SH-B11_02619	TUAT1_02492
group_3127		hypothetical protein	6	6	1	2	4232				278	278	278	C4_03329	GR8_00662	HM-7_01724	MTCC-B6033_03546	SH-B11_03621	TUAT1_03532
xre		HTH-type transcriptional regulator Xre	6	6	1	2	4925				377	377	377	C4_02737	GR8_00053	HM-7_01129	MTCC-B6033_02944	SH-B11_03021	TUAT1_02931
yjcF_1		putative N-acetyltransferase YjcF	6	6	1	2	1855				434	434	434	C4_01056	GR8_02154	HM-7_03369	MTCC-B6033_01231	SH-B11_01210	TUAT1_01188
group_313		hypothetical protein	6	6	1	2	881				815	815	815	C4_00233	GR8_01326	HM-7_02392	MTCC-B6033_00337	SH-B11_00335	TUAT1_00350
sinR_2		HTH-type transcriptional regulator SinR	6	6	1	2	3314				341	341	341	C4_02131	GR8_03228	HM-7_00506	MTCC-B6033_02316	SH-B11_02328	TUAT1_02258
mrp		Iron-sulfur cluster carrier protein	6	6	1	2	1772				308	308	308	C4_00983	GR8_02076	HM-7_03296	MTCC-B6033_01158	SH-B11_01135	TUAT1_01115
group_3132		hypothetical protein	6	6	1	2	3186				350	350	350	C4_02009	GR8_03106	HM-7_00383	MTCC-B6033_02193	SH-B11_02203	TUAT1_02136
crgA		Cell division protein CrgA	6	6	1	2	3370				362	362	362	C4_02176	GR8_03273	HM-7_00551	MTCC-B6033_02361	SH-B11_02373	TUAT1_02303
group_3134		hypothetical protein	6	6	1	2	1399				191	191	191	C4_00668	GR8_01757	HM-7_02979	MTCC-B6033_00781	SH-B11_00818	TUAT1_00799
fliJ		Flagellar FliJ protein	6	6	1	2	2387				443	443	443	C4_01469	GR8_02558	HM-7_03782	MTCC-B6033_01649	SH-B11_01666	TUAT1_01596
bfmBAB_2		2-oxoisovalerate dehydrogenase subunit beta	6	6	1	2	3263				983	983	983	C4_02080	GR8_03178	HM-7_00455	MTCC-B6033_02266	SH-B11_02278	TUAT1_02208
group_3137		hypothetical protein	6	6	1	2	2497				212	212	212	C4_01575	GR8_02664	HM-7_03887	MTCC-B6033_01756	SH-B11_01774	TUAT1_01702
yabP		Spore protein YabP	6	6	1	2	3784				308	308	308	C4_03737	GR8_01061	HM-7_02123	MTCC-B6033_00074	SH-B11_00075	TUAT1_00073
apt		Adenine phosphoribosyltransferase	6	6	1	2	5393				512	512	512	C4_02349	GR8_03446	HM-7_00732	MTCC-B6033_02538	SH-B11_02610	TUAT1_02483
glcP		Glucose/mannose transporter GlcP	6	6	1	2	897				1187	1220	1209	C4_00249	GR8_01342	HM-7_02408	MTCC-B6033_00353	SH-B11_00351	TUAT1_00366
rnpA		Ribonuclease P protein component	6	6	1	2	3847				359	359	359	C4_03673	GR8_00988	HM-7_02049	MTCC-B6033_03892	SH-B11_03968	TUAT1_03853
group_3141		hypothetical protein	6	6	1	2	3103				539	539	539	C4_01927	GR8_03025	HM-7_00301	MTCC-B6033_02112	SH-B11_02122	TUAT1_02054
mcsA		Protein-arginine kinase activator protein	6	6	1	2	3760				482	482	482	C4_00002	GR8_01102	HM-7_02164	MTCC-B6033_00115	SH-B11_00116	TUAT1_00114
group_3143		hypothetical protein	6	6	1	2	5342				188	188	188	C4_02397	GR8_03494	HM-7_00780	MTCC-B6033_02586	SH-B11_02658	TUAT1_02531
yycJ		Putative metallo-hydrolase YycJ	6	6	1	2	3904				794	794	794	C4_03615	GR8_00931	HM-7_01991	MTCC-B6033_03834	SH-B11_03906	TUAT1_03796
group_3145		hypothetical protein	6	6	1	2	2019				143	143	143	C4_01168	GR8_02258	HM-7_03483	MTCC-B6033_01347	SH-B11_01316	TUAT1_01296
group_3146		hypothetical protein	6	6	1	2	5165				185	185	185	C4_02509	GR8_03607	HM-7_00893	MTCC-B6033_02702	SH-B11_02778	TUAT1_02696
group_3147		hypothetical protein	6	6	1	2	2159				242	242	242	C4_01251	GR8_02339	HM-7_03564	MTCC-B6033_01429	SH-B11_01448	TUAT1_01379
ctsR		Transcriptional regulator CtsR	6	6	1	2	3761				464	464	464	C4_00001	GR8_01101	HM-7_02163	MTCC-B6033_00114	SH-B11_00115	TUAT1_00113
rpsL		30S ribosomal protein S12	6	6	1	2	3735				419	419	419	C4_00027	GR8_01127	HM-7_02189	MTCC-B6033_00140	SH-B11_00141	TUAT1_00139
group_315		hypothetical protein	6	6	1	2	899				629	629	629	C4_00250	GR8_01343	HM-7_02409	MTCC-B6033_00354	SH-B11_00352	TUAT1_00367
znuB		High-affinity zinc uptake system membrane protein ZnuB	6	6	1	2	3374				860	860	860	C4_02180	GR8_03277	HM-7_00555	MTCC-B6033_02365	SH-B11_02377	TUAT1_02307
group_3151		hypothetical protein	6	6	1	2	1331				257	257	257	C4_00605	GR8_01695	HM-7_02917	MTCC-B6033_00716	SH-B11_00756	TUAT1_00738
rpmB		50S ribosomal protein L28	6	6	1	2	2344				188	188	188	C4_01427	GR8_02516	HM-7_03740	MTCC-B6033_01607	SH-B11_01624	TUAT1_01554
nrdI		Protein NrdI	6	6	1	2	2498				398	398	398	C4_01576	GR8_02665	HM-7_03888	MTCC-B6033_01757	SH-B11_01775	TUAT1_01703
group_3154		hypothetical protein	6	6	1	2	2683				230	230	230	C4_01735	GR8_02832	HM-7_04052	MTCC-B6033_01919	SH-B11_01928	TUAT1_01858
ecsA_1		ABC-type transporter ATP-binding protein EcsA	6	6	1	2	1532				746	746	746	C4_00787	GR8_01879	HM-7_03099	MTCC-B6033_00906	SH-B11_00940	TUAT1_00919
group_3156		hypothetical protein	6	6	1	2	4379				410	410	410	C4_03213	GR8_00536	HM-7_01608	MTCC-B6033_03427	SH-B11_03493	TUAT1_03408
spoIIID		Stage III sporulation protein D	6	6	1	2	4371				278	278	278	C4_03221	GR8_00544	HM-7_01616	MTCC-B6033_03435	SH-B11_03501	TUAT1_03416
luxS		S-ribosylhomocysteine lyase	6	6	1	2	5008				473	473	473	C4_02653	GR8_03750	HM-7_01035	MTCC-B6033_02846	SH-B11_02923	TUAT1_02837
disA		DNA integrity scanning protein DisA	6	6	1	2	3756				1079	1079	1079	C4_00006	GR8_01106	HM-7_02168	MTCC-B6033_00119	SH-B11_00120	TUAT1_00118
group_316		hypothetical protein	6	6	1	2	907				596	596	596	C4_00254	GR8_01347	HM-7_02418	MTCC-B6033_00358	SH-B11_00356	TUAT1_00371
ohrR_1		Organic hydroperoxide resistance transcriptional regulator	6	6	1	2	2008				446	446	446	C4_01158	GR8_02248	HM-7_03472	MTCC-B6033_01336	SH-B11_01306	TUAT1_01285
yecS_1		L-cystine transport system permease protein YecS	6	6	1	2	934				677	677	677	C4_00279	GR8_01371	HM-7_02440	MTCC-B6033_00380	SH-B11_00381	TUAT1_00396
group_3162		Small, acid-soluble spore protein 2	6	6	1	2	1609				203	203	203	C4_00860	GR8_01953	HM-7_03172	MTCC-B6033_00977	SH-B11_01011	TUAT1_00991
pyrH		Uridylate kinase	6	6	1	2	2414				722	722	722	C4_01496	GR8_02585	HM-7_03809	MTCC-B6033_01676	SH-B11_01693	TUAT1_01623
group_3164		hypothetical protein	6	6	1	2	1054				263	263	263	C4_00384	GR8_01483	HM-7_02548	MTCC-B6033_00482	SH-B11_00495	TUAT1_00509
degU		Transcriptional regulatory protein DegU	6	6	1	2	4475				689	689	689	C4_03134	GR8_00457	HM-7_01528	MTCC-B6033_03344	SH-B11_03410	TUAT1_03329
pdhC_3		Dihydrolipoyllysine-residue acetyltransferase component of pyruvate dehydrogenase complex	6	6	1	2	2212				1343	1343	1343	C4_01301	GR8_02390	HM-7_03614	MTCC-B6033_01481	SH-B11_01498	TUAT1_01429
rpmGA		50S ribosomal protein L33 1	6	6	1	2	3354				149	149	149	C4_02160	GR8_03257	HM-7_00535	MTCC-B6033_02345	SH-B11_02357	TUAT1_02287
cccA		Cytochrome c-550	6	6	1	2	3384				359	359	359	C4_02190	GR8_03287	HM-7_00565	MTCC-B6033_02375	SH-B11_02387	TUAT1_02317
rplR		50S ribosomal protein L18	6	6	1	2	3713				362	362	362	C4_00049	GR8_01149	HM-7_02211	MTCC-B6033_00162	SH-B11_00163	TUAT1_00161
mmgD_1		2-methylcitrate synthase	6	6	1	2	911				845	845	845	C4_00256	GR8_01351	HM-7_02420	MTCC-B6033_00360	SH-B11_00358	TUAT1_00373
ruvB		Holliday junction ATP-dependent DNA helicase RuvB	6	6	1	2	5379				1004	1004	1004	C4_02362	GR8_03459	HM-7_00745	MTCC-B6033_02551	SH-B11_02623	TUAT1_02496
group_3171		hypothetical protein	6	6	1	2	1636				356	356	356	C4_00885	GR8_01978	HM-7_03197	MTCC-B6033_01002	SH-B11_01036	TUAT1_01016
sdhC		Succinate dehydrogenase cytochrome b558 subunit	6	6	1	2	5230				608	608	608	C4_02448	GR8_03546	HM-7_00832	MTCC-B6033_02640	SH-B11_02714	TUAT1_02635
group_3173		hypothetical protein	6	6	1	2	2572				428	428	428	C4_01634	GR8_02730	HM-7_03950	MTCC-B6033_01817	SH-B11_01830	TUAT1_01765
ansA		L-asparaginase 1	6	6	1	2	4075				989	989	989	C4_03476	GR8_00799	HM-7_01861	MTCC-B6033_03682	SH-B11_03767	TUAT1_03668
mtrB		Transcription attenuation protein MtrB	6	6	1	2	3122				230	230	230	C4_01946	GR8_03044	HM-7_00320	MTCC-B6033_02131	SH-B11_02141	TUAT1_02073
catD		Putative oxidoreductase CatD	6	6	1	2	1723				410	410	410	C4_00934	GR8_02027	HM-7_03247	MTCC-B6033_01109	SH-B11_01086	TUAT1_01066
ywlE		Protein-arginine-phosphatase	6	6	1	2	4325				458	458	458	C4_03267	GR8_00590	HM-7_01662	MTCC-B6033_03475	SH-B11_03542	TUAT1_03462
group_3178		hypothetical protein	6	6	1	2	2194				275	275	275	C4_01283	GR8_02371	HM-7_03596	MTCC-B6033_01462	SH-B11_01480	TUAT1_01411
gpmI		2,3-bisphosphoglycerate-independent phosphoglycerate mutase	6	6	1	2	4621				1535	1535	1535	C4_03001	GR8_00318	HM-7_01394	MTCC-B6033_03211	SH-B11_03276	TUAT1_03200
safD		Sulfoacetaldehyde dehydrogenase	6	6	1	2	912				1433	1433	1433	C4_00257	GR8_01352	HM-7_02421	MTCC-B6033_00361	SH-B11_00359	TUAT1_00374
glpK		Glycerol kinase	6	6	1	2	1570				1496	1496	1496	C4_00824	GR8_01916	HM-7_03136	MTCC-B6033_00943	SH-B11_00977	TUAT1_00956
group_3181		hypothetical protein	6	6	1	2	4906				224	224	224	C4_02756	GR8_00072	HM-7_01148	MTCC-B6033_02963	SH-B11_03040	TUAT1_02950
rpmJ		50S ribosomal protein L36	6	6	1	2	3705				113	113	113	C4_00057	GR8_01157	HM-7_02219	MTCC-B6033_00170	SH-B11_00171	TUAT1_00169
glpT		Glycerol-3-phosphate transporter	6	6	1	2	771				1334	1334	1334	C4_00142	GR8_01237	HM-7_02301	MTCC-B6033_00243	SH-B11_00241	TUAT1_00259
mnmA		tRNA-specific 2-thiouridylase MnmA	6	6	1	2	5404				1118	1118	1118	C4_02338	GR8_03435	HM-7_00721	MTCC-B6033_02527	SH-B11_02599	TUAT1_02472
group_3185		hypothetical protein	6	6	1	2	1789				197	197	197	C4_00999	GR8_02092	HM-7_03312	MTCC-B6033_01174	SH-B11_01151	TUAT1_01131
secE		Protein translocase subunit SecE	6	6	1	2	3745				176	176	176	C4_00017	GR8_01117	HM-7_02179	MTCC-B6033_00130	SH-B11_00131	TUAT1_00129
scpA		Segregation and condensation protein A	6	6	1	2	3170				758	758	758	C4_01993	GR8_03090	HM-7_00367	MTCC-B6033_02177	SH-B11_02187	TUAT1_02120
group_3188		hypothetical protein	6	6	1	2	2233				233	233	233	C4_01317	GR8_02406	HM-7_03630	MTCC-B6033_01497	SH-B11_01514	TUAT1_01445
group_3189		hypothetical protein	6	6	1	2	4409				170	170	170	C4_03186	GR8_00509	HM-7_01581	MTCC-B6033_03400	SH-B11_03466	TUAT1_03381
group_319		hypothetical protein	6	6	1	2	918				1361	1361	1361	C4_00263	GR8_01358	HM-7_02427	MTCC-B6033_00367	SH-B11_00365	TUAT1_00380
group_3190		hypothetical protein	6	6	1	2	2284				368	368	368	C4_01368	GR8_02457	HM-7_03681	MTCC-B6033_01548	SH-B11_01565	TUAT1_01495
group_3191		hypothetical protein	6	6	1	2	3393				143	143	143	C4_02199	GR8_03296	HM-7_00574	MTCC-B6033_02384	SH-B11_02396	TUAT1_02326
group_3192		hypothetical protein	6	6	1	2	1851				257	257	257	C4_01053	GR8_02151	HM-7_03366	MTCC-B6033_01228	SH-B11_01205	TUAT1_01185
sigX		ECF RNA polymerase sigma factor SigX	6	6	1	2	3157				560	560	560	C4_01981	GR8_03078	HM-7_00355	MTCC-B6033_02165	SH-B11_02175	TUAT1_02108
carD		RNA polymerase-binding transcription factor CarD	6	6	1	2	2483				473	473	473	C4_01561	GR8_02650	HM-7_03873	MTCC-B6033_01742	SH-B11_01760	TUAT1_01688
rpsC		30S ribosomal protein S3	6	6	1	2	3723				656	656	656	C4_00039	GR8_01139	HM-7_02201	MTCC-B6033_00152	SH-B11_00153	TUAT1_00151
group_3196		hypothetical protein	6	6	1	2	3844				215	215	215	C4_03676	GR8_00991	HM-7_02052	MTCC-B6033_00003	SH-B11_00003	TUAT1_00003
hupA		DNA-binding protein HU 1	6	6	1	2	3124				278	278	278	C4_01948	GR8_03046	HM-7_00322	MTCC-B6033_02133	SH-B11_02143	TUAT1_02075
ftsE		Cell division ATP-binding protein FtsE	6	6	1	2	4502				686	686	686	C4_03108	GR8_00431	HM-7_01502	MTCC-B6033_03318	SH-B11_03384	TUAT1_03303
spo0E		Aspartyl-phosphate phosphatase Spo0E	6	6	1	2	2056				242	242	242	C4_01200	GR8_02290	HM-7_03514	MTCC-B6033_01379	SH-B11_01349	TUAT1_01328
fnr		Fumarate and nitrate reduction regulatory protein	6	6	1	2	3939				590	590	590	C4_03594	GR8_00913	HM-7_01973	MTCC-B6033_03814	SH-B11_03887	TUAT1_03780
group_320		2-oxoglutaramate amidase	6	6	1	2	926				785	785	785	C4_00271	GR8_01363	HM-7_02432	MTCC-B6033_00372	SH-B11_00373	TUAT1_00388
group_3200		hypothetical protein	6	6	1	2	3084				170	170	170	C4_01908	GR8_03006	HM-7_00282	MTCC-B6033_02093	SH-B11_02103	TUAT1_02035
sigA		RNA polymerase sigma factor SigA	6	6	1	2	3385				1121	1121	1121	C4_02191	GR8_03288	HM-7_00566	MTCC-B6033_02376	SH-B11_02388	TUAT1_02318
group_3202		hypothetical protein	6	6	1	2	4041				263	263	263	C4_03508	GR8_00830	HM-7_01890	MTCC-B6033_03716	SH-B11_03799	TUAT1_03697
pyrR		Bifunctional protein PyrR	6	6	1	2	2308				542	542	542	C4_01392	GR8_02481	HM-7_03705	MTCC-B6033_01572	SH-B11_01589	TUAT1_01519
tetA_3		Tetracycline resistance protein, class B	6	6	1	2	4885				1187	1187	1187	C4_02774	GR8_00090	HM-7_01166	MTCC-B6033_02983	SH-B11_03058	TUAT1_02968
gerPF_2		putative spore germination protein GerPF	6	6	1	2	4851				221	221	221	C4_02805	GR8_00121	HM-7_01197	MTCC-B6033_03014	SH-B11_03090	TUAT1_02999
group_3206		1,4-dihydroxy-2-naphthoyl-CoA hydrolase	6	6	1	2	5233				458	458	458	C4_02445	GR8_03543	HM-7_00829	MTCC-B6033_02637	SH-B11_02711	TUAT1_02632
group_3207		hypothetical protein	6	6	1	2	5418				266	266	266	C4_02326	GR8_03423	HM-7_00709	MTCC-B6033_02515	SH-B11_02587	TUAT1_02460
group_3208		hypothetical protein	6	6	1	2	1366				137	137	137	C4_00636	GR8_01727	HM-7_02948	MTCC-B6033_00751	SH-B11_00788	TUAT1_00769
tcyC		L-cystine import ATP-binding protein TcyC	6	6	1	2	966				743	743	743	C4_00308	GR8_01403	HM-7_02473	MTCC-B6033_00407	SH-B11_00410	TUAT1_00431
yukD		ESX secretion system protein YukD	6	6	1	2	4839				239	239	239	C4_02816	GR8_00132	HM-7_01208	MTCC-B6033_03025	SH-B11_03101	TUAT1_03010
group_3211		hypothetical protein	6	6	1	2	1472				173	173	173	C4_00721	GR8_01811	HM-7_03032	MTCC-B6033_00841	SH-B11_00871	TUAT1_00849
rplK		50S ribosomal protein L11	6	6	1	2	3743				425	425	425	C4_00019	GR8_01119	HM-7_02181	MTCC-B6033_00132	SH-B11_00133	TUAT1_00131
rpsE		30S ribosomal protein S5	6	6	1	2	3712				500	500	500	C4_00050	GR8_01150	HM-7_02212	MTCC-B6033_00163	SH-B11_00164	TUAT1_00162
erpA		Iron-sulfur cluster insertion protein ErpA	6	6	1	2	4824				362	362	362	C4_02831	GR8_00147	HM-7_01223	MTCC-B6033_03040	SH-B11_03118	TUAT1_03027
odhB		Dihydrolipoyllysine-residue succinyltransferase component of 2-oxoglutarate dehydrogenase complex	6	6	1	2	2754				1256	1256	1256	C4_01801	GR8_02898	HM-7_04118	MTCC-B6033_01985	SH-B11_01993	TUAT1_01925
sufC		Vegetative protein 296	6	6	1	2	4755				785	785	785	C4_02881	GR8_00200	HM-7_01274	MTCC-B6033_03092	SH-B11_03167	TUAT1_03082
group_3217		hypothetical protein	6	6	1	2	5010				146	146	146	C4_02651	GR8_03748	HM-7_01033	MTCC-B6033_02844	SH-B11_02921	TUAT1_02835
dnaC		Replicative DNA helicase	6	6	1	2	3890				1364	1364	1364	C4_03631	GR8_00947	HM-7_02007	MTCC-B6033_03850	SH-B11_03922	TUAT1_03812
group_3219		hypothetical protein	6	6	1	2	4677				611	611	611	C4_02954	GR8_00271	HM-7_01347	MTCC-B6033_03165	SH-B11_03230	TUAT1_03153
group_322		hypothetical protein	6	6	1	2	937				764	764	764	C4_00282	GR8_01374	HM-7_02443	MTCC-B6033_00383	SH-B11_00384	TUAT1_00399
licA		Lichenan-specific phosphotransferase enzyme IIA component	6	6	1	2	4123				326	326	326	C4_03432	GR8_00754	HM-7_01817	MTCC-B6033_03638	SH-B11_03723	TUAT1_03624
upp		Uracil phosphoribosyltransferase	6	6	1	2	4329				629	629	629	C4_03263	GR8_00586	HM-7_01658	MTCC-B6033_03471	SH-B11_03538	TUAT1_03458
rsmA		Ribosomal RNA small subunit methyltransferase A	6	6	1	2	3802				878	878	878	C4_03719	GR8_01043	HM-7_02105	MTCC-B6033_00055	SH-B11_00057	TUAT1_00055
recR		Recombination protein RecR	6	6	1	2	3823				596	596	596	C4_03698	GR8_01017	HM-7_02079	MTCC-B6033_00029	SH-B11_00031	TUAT1_00029
ytfJ		putative spore protein YtfJ	6	6	1	2	5150				452	452	452	C4_02522	GR8_03621	HM-7_00906	MTCC-B6033_02716	SH-B11_02792	TUAT1_02710
group_3225		hypothetical protein	6	6	1	2	3405				992	992	992	C4_02209	GR8_03306	HM-7_00584	MTCC-B6033_02394	SH-B11_02407	TUAT1_02336
yusV_1		putative siderophore transport system ATP-binding protein YusV	6	6	1	2	4736				830	830	830	C4_02899	GR8_00218	HM-7_01293	MTCC-B6033_03111	SH-B11_03185	TUAT1_03100
rpsI		30S ribosomal protein S9	6	6	1	2	3694				392	392	392	C4_00067	GR8_01167	HM-7_02229	MTCC-B6033_00180	SH-B11_00181	TUAT1_00179
group_3228		hypothetical protein	6	6	1	2	5039				179	179	179	C4_02623	GR8_03721	HM-7_01005	MTCC-B6033_02816	SH-B11_02893	TUAT1_02807
gntT_1		High-affinity gluconate transporter	6	6	1	2	4059				1319	1319	1319	C4_03489	GR8_00812	HM-7_01874	MTCC-B6033_03697	SH-B11_03780	TUAT1_03681
nucB_1		Sporulation-specific extracellular nuclease	6	6	1	2	942				428	428	428	C4_00287	GR8_01379	HM-7_02448	MTCC-B6033_00388	SH-B11_00389	TUAT1_00404
hchA		Molecular chaperone Hsp31 and glyoxalase 3	6	6	1	2	4044				656	656	656	C4_03505	GR8_00827	HM-7_01887	MTCC-B6033_03713	SH-B11_03796	TUAT1_03694
recA		Protein RecA	6	6	1	2	2465				1043	1043	1043	C4_01545	GR8_02634	HM-7_03858	MTCC-B6033_01726	SH-B11_01742	TUAT1_01672
xkdM		Phage-like element PBSX protein XkdM	6	6	1	2	4948				443	443	443	C4_02719	GR8_00035	HM-7_01111	MTCC-B6033_02925	SH-B11_03003	TUAT1_02913
rplGB		Ribosome-associated protein L7Ae-like protein	6	6	1	2	3736				248	248	248	C4_00026	GR8_01126	HM-7_02188	MTCC-B6033_00139	SH-B11_00140	TUAT1_00138
comGC		ComG operon protein 3	6	6	1	2	3333				293	293	293	C4_02141	GR8_03238	HM-7_00516	MTCC-B6033_02326	SH-B11_02338	TUAT1_02268
der_2		GTPase Der	6	6	1	2	3129				1310	1310	1310	C4_01953	GR8_03051	HM-7_00327	MTCC-B6033_02138	SH-B11_02148	TUAT1_02080
gatC_2		PTS system galactitol-specific EIIC component	6	6	1	2	1966				1373	1373	1373	C4_01118	GR8_02207	HM-7_03432	MTCC-B6033_01295	SH-B11_01265	TUAT1_01245
yxeM		putative amino-acid-binding protein YxeM	6	6	1	2	976				794	794	794	C4_00317	GR8_01412	HM-7_02481	MTCC-B6033_00416	SH-B11_00419	TUAT1_00440
group_3238		hypothetical protein	6	6	1	2	4721				368	368	368	C4_02913	GR8_00231	HM-7_01307	MTCC-B6033_03125	SH-B11_03198	TUAT1_03113
murAA		UDP-N-acetylglucosamine 1-carboxyvinyltransferase 1	6	6	1	2	4342				1307	1307	1307	C4_03250	GR8_00573	HM-7_01645	MTCC-B6033_03458	SH-B11_03525	TUAT1_03445
gabR_1		HTH-type transcriptional regulatory protein GabR	6	6	1	2	961				1337	1337	1337	C4_00303	GR8_01398	HM-7_02467	MTCC-B6033_00402	SH-B11_00403	TUAT1_00423
group_3240		hypothetical protein	6	6	1	2	703				602	602	602	C4_00085	GR8_01176	HM-7_02239	MTCC-B6033_00189	SH-B11_00190	TUAT1_00192
group_3241		hypothetical protein	6	6	1	2	2161				191	191	191	C4_01253	GR8_02341	HM-7_03566	MTCC-B6033_01431	SH-B11_01450	TUAT1_01381
ilvD		Dihydroxy-acid dehydratase	6	6	1	2	3031				1676	1676	1676	C4_01860	GR8_02957	HM-7_00234	MTCC-B6033_02045	SH-B11_02052	TUAT1_01984
hrcA		Heat-inducible transcription repressor HrcA	6	6	1	2	3416				1031	1031	1031	C4_02220	GR8_03317	HM-7_00595	MTCC-B6033_02405	SH-B11_02418	TUAT1_02347
ecfA1		Energy-coupling factor transporter ATP-binding protein EcfA1	6	6	1	2	3700				842	842	842	C4_00062	GR8_01162	HM-7_02224	MTCC-B6033_00175	SH-B11_00176	TUAT1_00174
group_3245		hypothetical protein	6	6	1	2	1821				911	911	911	C4_01025	GR8_02123	HM-7_03338	MTCC-B6033_01200	SH-B11_01177	TUAT1_01157
group_3246		hypothetical protein	6	6	1	2	3293				308	308	308	C4_02110	GR8_03207	HM-7_00485	MTCC-B6033_02295	SH-B11_02307	TUAT1_02237
groL		60 kDa chaperonin	6	6	1	2	1195				1634	1634	1634	C4_00500	GR8_01594	HM-7_02665	MTCC-B6033_00608	SH-B11_00620	TUAT1_00625
mecB		Adapter protein MecA 2	6	6	1	2	3144				578	578	578	C4_01969	GR8_03066	HM-7_00342	MTCC-B6033_02153	SH-B11_02163	TUAT1_02096
group_3249		hypothetical protein	6	6	1	2	2197				131	131	131	C4_01286	GR8_02375	HM-7_03599	MTCC-B6033_01466	SH-B11_01483	TUAT1_01414
yxeP_2		putative hydrolase YxeP	6	6	1	2	979				1157	1157	1157	C4_00320	GR8_01415	HM-7_02484	MTCC-B6033_00419	SH-B11_00422	TUAT1_00443
hslR		Heat shock protein 15	6	6	1	2	3785				260	260	260	C4_03736	GR8_01060	HM-7_02122	MTCC-B6033_00073	SH-B11_00074	TUAT1_00072
yusO_4		putative HTH-type transcriptional regulator YusO	6	6	1	2	5294				440	440	440	C4_02439	GR8_03537	HM-7_00823	MTCC-B6033_02631	SH-B11_02705	TUAT1_02571
ilvK		Branched-chain-amino-acid aminotransferase 2	6	6	1	2	4128				1091	1091	1091	C4_03428	GR8_00750	HM-7_01813	MTCC-B6033_03634	SH-B11_03719	TUAT1_03620
rpsS		30S ribosomal protein S19	6	6	1	2	3725				278	278	278	C4_00037	GR8_01137	HM-7_02199	MTCC-B6033_00150	SH-B11_00151	TUAT1_00149
group_3254		hypothetical protein	6	6	1	2	3171				92	92	92	C4_01994	GR8_03091	HM-7_00368	MTCC-B6033_02178	SH-B11_02188	TUAT1_02121
yxeN_1		putative amino-acid permease protein YxeN	6	6	1	2	977				674	674	674	C4_00318	GR8_01413	HM-7_02482	MTCC-B6033_00417	SH-B11_00420	TUAT1_00441
cdaA		Cyclic di-AMP synthase CdaA	6	6	1	2	719				821	821	821	C4_00107	GR8_01199	HM-7_02262	MTCC-B6033_00212	SH-B11_00213	TUAT1_00217
group_3257		hypothetical protein	6	6	1	2	4385				143	143	143	C4_03207	GR8_00530	HM-7_01602	MTCC-B6033_03421	SH-B11_03487	TUAT1_03402
cheD		Chemoreceptor glutamine deamidase CheD	6	6	1	2	2409				500	500	500	C4_01491	GR8_02580	HM-7_03804	MTCC-B6033_01671	SH-B11_01688	TUAT1_01618
group_3259		hypothetical protein	6	6	1	2	3747				512	512	512	C4_00015	GR8_01115	HM-7_02177	MTCC-B6033_00128	SH-B11_00129	TUAT1_00127
group_3260		hypothetical protein	6	6	1	2	1035				296	296	296	C4_00368	GR8_01463	HM-7_02532	MTCC-B6033_00466	SH-B11_00476	TUAT1_00491
group_3261		hypothetical protein	6	6	1	2	4520				245	245	245	C4_03090	GR8_00413	HM-7_01484	MTCC-B6033_03300	SH-B11_03366	TUAT1_03285
cspD		Cold shock protein CspD	6	6	1	2	3040				200	200	200	C4_01868	GR8_02965	HM-7_00242	MTCC-B6033_02053	SH-B11_02062	TUAT1_01993
pdhA		Pyruvate dehydrogenase E1 component subunit alpha	6	6	1	2	2210				1115	1115	1115	C4_01299	GR8_02388	HM-7_03612	MTCC-B6033_01479	SH-B11_01496	TUAT1_01427
gmuA_2		PTS system oligo-beta-mannoside-specific EIIA component	6	6	1	2	4088				329	329	329	C4_03464	GR8_00786	HM-7_01849	MTCC-B6033_03670	SH-B11_03755	TUAT1_03656
group_3265		hypothetical protein	6	6	1	2	3356				500	500	500	C4_02162	GR8_03259	HM-7_00537	MTCC-B6033_02347	SH-B11_02359	TUAT1_02289
yusO_2		putative HTH-type transcriptional regulator YusO	6	6	1	2	1461				479	479	479	C4_00710	GR8_01800	HM-7_03021	MTCC-B6033_00830	SH-B11_00860	TUAT1_00838
secG		putative protein-export membrane protein SecG	6	6	1	2	4645				233	233	233	C4_02981	GR8_00298	HM-7_01374	MTCC-B6033_03191	SH-B11_03256	TUAT1_03180
group_3268		hypothetical protein	6	6	1	2	4955				266	266	266	C4_02713	GR8_00029	HM-7_01105	MTCC-B6033_02919	SH-B11_02997	TUAT1_02907
group_3269		hypothetical protein	6	6	1	2	4255				221	221	221	C4_03316	GR8_00649	HM-7_01711	MTCC-B6033_03535	SH-B11_03608	TUAT1_03521
group_3270		Ferredoxin	6	6	1	2	3151				248	248	248	C4_01976	GR8_03073	HM-7_00349	MTCC-B6033_02160	SH-B11_02170	TUAT1_02103
infC		Translation initiation factor IF-3	6	6	1	2	5200				464	464	464	C4_02476	GR8_03574	HM-7_00860	MTCC-B6033_02669	SH-B11_02742	TUAT1_02663
abrB		Transition state regulatory protein AbrB	6	6	1	2	3807				284	284	284	C4_03714	GR8_01038	HM-7_02100	MTCC-B6033_00050	SH-B11_00052	TUAT1_00050
licB_1		Lichenan-specific phosphotransferase enzyme IIB component	6	6	1	2	4121				305	305	305	C4_03434	GR8_00756	HM-7_01819	MTCC-B6033_03640	SH-B11_03725	TUAT1_03626
rlmG		Ribosomal RNA large subunit methyltransferase G	6	6	1	2	3739				605	605	605	C4_00023	GR8_01123	HM-7_02185	MTCC-B6033_00136	SH-B11_00137	TUAT1_00135
rpsQ		30S ribosomal protein S17	6	6	1	2	3720				263	263	263	C4_00042	GR8_01142	HM-7_02204	MTCC-B6033_00155	SH-B11_00156	TUAT1_00154
cotZ		Spore coat protein Z	6	6	1	2	1842				443	443	443	C4_01044	GR8_02142	HM-7_03357	MTCC-B6033_01219	SH-B11_01196	TUAT1_01176
group_3277		hypothetical protein	6	6	1	2	4043				164	164	164	C4_03506	GR8_00828	HM-7_01888	MTCC-B6033_03714	SH-B11_03797	TUAT1_03695
ktrA		Ktr system potassium uptake protein A	6	6	1	2	2202				668	668	668	C4_01291	GR8_02380	HM-7_03604	MTCC-B6033_01471	SH-B11_01488	TUAT1_01419
folE		GTP cyclohydrolase 1	6	6	1	2	3123				569	569	569	C4_01947	GR8_03045	HM-7_00321	MTCC-B6033_02132	SH-B11_02142	TUAT1_02074
srrB		Sensor protein SrrB	6	6	1	2	983				1427	1427	1427	C4_00324	GR8_01418	HM-7_02488	MTCC-B6033_00423	SH-B11_00426	TUAT1_00447
rpsG		30S ribosomal protein S7	6	6	1	2	3734				470	470	470	C4_00028	GR8_01128	HM-7_02190	MTCC-B6033_00141	SH-B11_00142	TUAT1_00140
xpt		Xanthine phosphoribosyltransferase	6	6	1	2	3056				584	584	584	C4_01883	GR8_02980	HM-7_00257	MTCC-B6033_02067	SH-B11_02077	TUAT1_02009
rplD		50S ribosomal protein L4	6	6	1	2	3728				623	623	623	C4_00034	GR8_01134	HM-7_02196	MTCC-B6033_00147	SH-B11_00148	TUAT1_00146
group_3283		hypothetical protein	6	6	1	2	5384				377	377	377	C4_02357	GR8_03454	HM-7_00740	MTCC-B6033_02546	SH-B11_02618	TUAT1_02491
group_3284		hypothetical protein	6	6	1	2	2588				125	125	125	C4_01650	GR8_02746	HM-7_03966	MTCC-B6033_01833	SH-B11_01846	TUAT1_01781
yuaF		putative membrane protein YuaF	6	6	1	2	4982				524	524	524	C4_02692	GR8_00008	HM-7_01084	MTCC-B6033_02895	SH-B11_02974	TUAT1_02886
dagK		Diacylglycerol kinase	6	6	1	2	1283				908	908	908	C4_00572	GR8_01666	HM-7_02887	MTCC-B6033_00686	SH-B11_00725	TUAT1_00706
rpsM		30S ribosomal protein S13	6	6	1	2	3704				365	365	365	C4_00058	GR8_01158	HM-7_02220	MTCC-B6033_00171	SH-B11_00172	TUAT1_00170
group_3288		hypothetical protein	6	6	1	2	5357				338	338	338	C4_02382	GR8_03479	HM-7_00765	MTCC-B6033_02571	SH-B11_02643	TUAT1_02516
group_3289		hypothetical protein	6	6	1	2	1617				356	356	356	C4_00867	GR8_01960	HM-7_03179	MTCC-B6033_00984	SH-B11_01018	TUAT1_00998
sdpR		Transcriptional repressor SdpR	6	6	1	2	989				263	311	303	C4_00330	GR8_01424	HM-7_02494	MTCC-B6033_00428	SH-B11_00432	TUAT1_00453
fliS		Flagellar protein FliS	6	6	1	2	4491				404	404	404	C4_03119	GR8_00442	HM-7_01513	MTCC-B6033_03329	SH-B11_03395	TUAT1_03314
rpsK		30S ribosomal protein S11	6	6	1	2	3703				395	395	395	C4_00059	GR8_01159	HM-7_02221	MTCC-B6033_00172	SH-B11_00173	TUAT1_00171
gltT_1		Proton/sodium-glutamate symport protein	6	6	1	2	1178				1250	1250	1250	C4_00478	GR8_01571	HM-7_02642	MTCC-B6033_00585	SH-B11_00598	TUAT1_00602
group_3293		hypothetical protein	6	6	1	2	2735				662	662	662	C4_01784	GR8_02880	HM-7_04100	MTCC-B6033_01967	SH-B11_01975	TUAT1_01906
yofA		HTH-type transcriptional regulator YofA	6	6	1	2	5236				860	860	860	C4_02442	GR8_03540	HM-7_00826	MTCC-B6033_02634	SH-B11_02708	TUAT1_02629
gltT_2		Proton/sodium-glutamate symport protein	6	6	1	2	1654				1289	1289	1289	C4_00903	GR8_01996	HM-7_03215	MTCC-B6033_01020	SH-B11_01055	TUAT1_01035
group_3296		hypothetical protein	6	6	1	2	4526				194	194	194	C4_03084	GR8_00407	HM-7_01478	MTCC-B6033_03294	SH-B11_03360	TUAT1_03279
dapH_1		2,3,4,5-tetrahydropyridine-2,6-dicarboxylate N-acetyltransferase	6	6	1	2	2168				710	710	710	C4_01260	GR8_02348	HM-7_03573	MTCC-B6033_01438	SH-B11_01457	TUAT1_01388
menB		1,4-dihydroxy-2-naphthoyl-CoA synthase	6	6	1	2	4997				818	818	818	C4_02664	GR8_03761	HM-7_01046	MTCC-B6033_02857	SH-B11_02934	TUAT1_02848
tcdA		tRNA threonylcarbamoyladenosine dehydratase	6	6	1	2	5400				764	764	764	C4_02342	GR8_03439	HM-7_00725	MTCC-B6033_02531	SH-B11_02603	TUAT1_02476
gltR_1		HTH-type transcriptional regulator GltR	6	6	1	2	991				734	734	734	C4_00332	GR8_01426	HM-7_02496	MTCC-B6033_00430	SH-B11_00434	TUAT1_00455
group_3300		hypothetical protein	6	6	1	2	5508				326	326	326	C4_02261	GR8_03350	HM-7_00635	MTCC-B6033_02445	SH-B11_02521	TUAT1_02387
sigW		ECF RNA polymerase sigma factor SigW	6	6	1	2	717				563	563	563	C4_00105	GR8_01197	HM-7_02260	MTCC-B6033_00210	SH-B11_00211	TUAT1_00215
rsmD		Ribosomal RNA small subunit methyltransferase D	6	6	1	2	2257				551	551	551	C4_01341	GR8_02430	HM-7_03654	MTCC-B6033_01521	SH-B11_01538	TUAT1_01469
group_3303		hypothetical protein	6	6	1	2	4826				206	206	206	C4_02829	GR8_00145	HM-7_01221	MTCC-B6033_03038	SH-B11_03114	TUAT1_03023
group_3304		hypothetical protein	6	6	1	2	5012				191	191	191	C4_02649	GR8_03746	HM-7_01031	MTCC-B6033_02842	SH-B11_02919	TUAT1_02833
czrA		HTH-type transcriptional repressor CzrA	6	6	1	2	2733				329	329	329	C4_01782	GR8_02878	HM-7_04098	MTCC-B6033_01965	SH-B11_01973	TUAT1_01904
group_3306		hypothetical protein	6	6	1	2	2449				236	236	236	C4_01530	GR8_02619	HM-7_03843	MTCC-B6033_01711	SH-B11_01727	TUAT1_01657
glpX		Fructose-1,6-bisphosphatase class 2	6	6	1	2	4311				965	965	965	C4_03281	GR8_00604	HM-7_01676	MTCC-B6033_03489	SH-B11_03556	TUAT1_03476
group_3308		hypothetical protein	6	6	1	2	1057				260	260	260	C4_00387	GR8_01486	HM-7_02551	MTCC-B6033_00485	SH-B11_00498	TUAT1_00512
mhqR_3		HTH-type transcriptional regulator MhqR	6	6	1	2	2058				455	455	455	C4_01202	GR8_02292	HM-7_03516	MTCC-B6033_01381	SH-B11_01351	TUAT1_01330
ycnJ		Copper transport protein YcnJ	6	6	1	2	998				1634	1634	1634	C4_00339	GR8_01433	HM-7_02503	MTCC-B6033_00437	SH-B11_00441	TUAT1_00462
coaA		Pantothenate kinase	6	6	1	2	3222				959	959	959	C4_02042	GR8_03140	HM-7_00417	MTCC-B6033_02229	SH-B11_02237	TUAT1_02170
rplV		50S ribosomal protein L22	6	6	1	2	3724				341	341	341	C4_00038	GR8_01138	HM-7_02200	MTCC-B6033_00151	SH-B11_00152	TUAT1_00150
ywcE		Spore morphogenesis and germination protein YwcE	6	6	1	2	4169				263	263	263	C4_03388	GR8_00713	HM-7_01776	MTCC-B6033_03597	SH-B11_03676	TUAT1_03583
fliP		Flagellar biosynthetic protein FliP	6	6	1	2	2398				665	665	665	C4_01480	GR8_02569	HM-7_03793	MTCC-B6033_01660	SH-B11_01677	TUAT1_01607
purN		Phosphoribosylglycinamide formyltransferase	6	6	1	2	1252				569	569	569	C4_00542	GR8_01636	HM-7_02857	MTCC-B6033_00656	SH-B11_00680	TUAT1_00675
group_3315	yugI_1	General stress protein 13	6	6	1	2	3781				398	398	398	C4_03740	GR8_01064	HM-7_02126	MTCC-B6033_00077	SH-B11_00078	TUAT1_00076
ydaG		General stress protein 26	6	6	1	2	1032				422	422	422	C4_00365	GR8_01459	HM-7_02529	MTCC-B6033_00463	SH-B11_00473	TUAT1_00488
group_3317		hypothetical protein	6	6	1	2	4524				335	335	335	C4_03086	GR8_00409	HM-7_01480	MTCC-B6033_03296	SH-B11_03362	TUAT1_03281
rplW		50S ribosomal protein L23	6	6	1	2	3727				287	287	287	C4_00035	GR8_01135	HM-7_02197	MTCC-B6033_00148	SH-B11_00149	TUAT1_00147
glvR_2		HTH-type transcriptional regulator GlvR	6	6	1	2	2654				776	776	776	C4_01707	GR8_02803	HM-7_04025	MTCC-B6033_01890	SH-B11_01899	TUAT1_01831
group_332		hypothetical protein	6	6	1	2	1019				791	791	791	C4_00355	GR8_01449	HM-7_02519	MTCC-B6033_00453	SH-B11_00463	TUAT1_00478
group_3320		hypothetical protein	6	6	1	2	2762				125	125	125	C4_01808	GR8_02905	HM-7_04125	MTCC-B6033_01993	SH-B11_02000	TUAT1_01932
ywiE_1		putative cardiolipin synthase YwiE	6	6	1	2	1817				1520	1520	1520	C4_01021	GR8_02119	HM-7_03334	MTCC-B6033_01196	SH-B11_01173	TUAT1_01153
cccB_1		Cytochrome c-551	6	6	1	2	3099				767	767	767	C4_01923	GR8_03021	HM-7_00297	MTCC-B6033_02108	SH-B11_02118	TUAT1_02050
tagD		Glycerol-3-phosphate cytidylyltransferase	6	6	1	2	4435				389	389	389	C4_03161	GR8_00484	HM-7_01556	MTCC-B6033_03375	SH-B11_03441	TUAT1_03356
mntB		Manganese transport system membrane protein MntB	6	6	1	2	4672				872	872	872	C4_02959	GR8_00276	HM-7_01352	MTCC-B6033_03170	SH-B11_03235	TUAT1_03158
rpoB		DNA-directed RNA polymerase subunit beta	6	6	1	2	3738				3581	3581	3581	C4_00024	GR8_01124	HM-7_02186	MTCC-B6033_00137	SH-B11_00138	TUAT1_00136
group_3326		hypothetical protein	6	6	1	2	4158				257	257	257	C4_03398	GR8_00723	HM-7_01786	MTCC-B6033_03607	SH-B11_03686	TUAT1_03593
group_3327		RNA-binding protein	6	6	1	2	3434				290	290	290	C4_02237	GR8_03334	HM-7_00612	MTCC-B6033_02422	SH-B11_02435	TUAT1_02364
sigY		RNA polymerase sigma factor SigY	6	6	1	2	4113				530	530	530	C4_03442	GR8_00764	HM-7_01827	MTCC-B6033_03648	SH-B11_03733	TUAT1_03634
cynR_3		HTH-type transcriptional regulator CynR	6	6	1	2	4144				887	887	887	C4_03413	GR8_00735	HM-7_01798	MTCC-B6033_03619	SH-B11_03704	TUAT1_03605
lipC_1		Spore germination lipase LipC	6	6	1	2	1024				626	632	631	C4_00360	GR8_01454	HM-7_02524	MTCC-B6033_00458	SH-B11_00468	TUAT1_00483
group_3330		putative transcriptional regulatory protein	6	6	1	2	1395				719	719	719	C4_00665	GR8_01753	HM-7_02975	MTCC-B6033_00777	SH-B11_00814	TUAT1_00795
rplF		50S ribosomal protein L6	6	6	1	2	3714				536	536	536	C4_00048	GR8_01148	HM-7_02210	MTCC-B6033_00161	SH-B11_00162	TUAT1_00160
atpC		ATP synthase epsilon chain	6	6	1	2	4338				395	395	395	C4_03254	GR8_00577	HM-7_01649	MTCC-B6033_03462	SH-B11_03529	TUAT1_03449
betI_1		HTH-type transcriptional regulator BetI	6	6	1	2	2491				542	542	542	C4_01569	GR8_02658	HM-7_03881	MTCC-B6033_01750	SH-B11_01768	TUAT1_01696
rpmE		50S ribosomal protein L31	6	6	1	2	4313				200	200	200	C4_03279	GR8_00602	HM-7_01674	MTCC-B6033_03487	SH-B11_03554	TUAT1_03474
trxA		Thioredoxin	6	6	1	2	5226				314	314	314	C4_02452	GR8_03550	HM-7_00836	MTCC-B6033_02644	SH-B11_02718	TUAT1_02639
group_3336		hypothetical protein	6	6	1	2	1467				155	155	155	C4_00716	GR8_01806	HM-7_03027	MTCC-B6033_00836	SH-B11_00866	TUAT1_00844
ribA		GTP cyclohydrolase-2	6	6	1	2	1348				725	725	725	C4_00620	GR8_01710	HM-7_02932	MTCC-B6033_00735	SH-B11_00772	TUAT1_00753
tnrA		HTH-type transcriptional regulator TnrA	6	6	1	2	2025				329	329	329	C4_01173	GR8_02263	HM-7_03487	MTCC-B6033_01352	SH-B11_01322	TUAT1_01301
group_3339		hypothetical protein	6	6	1	2	1262				221	221	221	C4_00552	GR8_01646	HM-7_02867	MTCC-B6033_00666	SH-B11_00690	TUAT1_00686
group_3340		hypothetical protein	6	6	1	2	3259				437	437	437	C4_02076	GR8_03174	HM-7_00451	MTCC-B6033_02262	SH-B11_02274	TUAT1_02204
group_3341		hypothetical protein	6	6	1	2	3822				224	224	224	C4_03699	GR8_01018	HM-7_02080	MTCC-B6033_00030	SH-B11_00032	TUAT1_00030
group_3342		hypothetical protein	6	6	1	2	1494				530	530	530	C4_00739	GR8_01829	HM-7_03050	MTCC-B6033_00859	SH-B11_00889	TUAT1_00867
group_3343		hypothetical protein	6	6	1	2	3208				224	224	224	C4_02030	GR8_03128	HM-7_00405	MTCC-B6033_02215	SH-B11_02225	TUAT1_02158
group_3344		hypothetical protein	6	6	1	2	4507				353	353	353	C4_03103	GR8_00426	HM-7_01497	MTCC-B6033_03313	SH-B11_03379	TUAT1_03298
rplP		50S ribosomal protein L16	6	6	1	2	3722				434	434	434	C4_00040	GR8_01140	HM-7_02202	MTCC-B6033_00153	SH-B11_00154	TUAT1_00152
gerPF_1		putative spore germination protein GerPF	6	6	1	2	1730				218	218	218	C4_00941	GR8_02034	HM-7_03254	MTCC-B6033_01116	SH-B11_01093	TUAT1_01073
group_3347		hypothetical protein	6	6	1	2	2431				278	278	278	C4_01513	GR8_02602	HM-7_03826	MTCC-B6033_01694	SH-B11_01710	TUAT1_01640
group_3348		NAD-dependent malic enzyme	6	6	1	2	5169				1232	1232	1232	C4_02505	GR8_03603	HM-7_00889	MTCC-B6033_02698	SH-B11_02774	TUAT1_02692
rpmC		50S ribosomal protein L29	6	6	1	2	3721				200	200	200	C4_00041	GR8_01141	HM-7_02203	MTCC-B6033_00154	SH-B11_00155	TUAT1_00153
group_3350		hypothetical protein	6	6	1	2	4888				176	176	176	C4_02771	GR8_00087	HM-7_01163	MTCC-B6033_02980	SH-B11_03055	TUAT1_02965
sspI		Small, acid-soluble spore protein I	6	6	1	2	5208				221	221	221	C4_02469	GR8_03567	HM-7_00853	MTCC-B6033_02661	SH-B11_02735	TUAT1_02656
lipM		Octanoyltransferase LipM	6	6	1	2	3306				836	836	836	C4_02123	GR8_03220	HM-7_00498	MTCC-B6033_02308	SH-B11_02320	TUAT1_02250
argG		Argininosuccinate synthase	6	6	1	2	5155				1211	1211	1211	C4_02517	GR8_03616	HM-7_00901	MTCC-B6033_02711	SH-B11_02787	TUAT1_02705
spo0A_2		Stage 0 sporulation protein A	6	6	1	2	3275				803	803	803	C4_02092	GR8_03189	HM-7_00467	MTCC-B6033_02277	SH-B11_02289	TUAT1_02219
spoIISB		Stage II sporulation protein SB	6	6	1	2	1955				176	176	176	C4_01107	GR8_02196	HM-7_03421	MTCC-B6033_01284	SH-B11_01254	TUAT1_01234
tuf		Elongation factor Tu	6	6	1	2	3732				1190	1190	1190	C4_00030	GR8_01130	HM-7_02192	MTCC-B6033_00143	SH-B11_00144	TUAT1_00142
mhqR_4		HTH-type transcriptional regulator MhqR	6	6	1	2	4037				437	437	437	C4_03512	GR8_00834	HM-7_01894	MTCC-B6033_03720	SH-B11_03803	TUAT1_03701
mapB		Methionine aminopeptidase 2	6	6	1	2	1367				749	749	749	C4_00638	GR8_01728	HM-7_02949	MTCC-B6033_00752	SH-B11_00790	TUAT1_00770
pfkA		ATP-dependent 6-phosphofructokinase	6	6	1	2	5172				959	959	959	C4_02502	GR8_03600	HM-7_00886	MTCC-B6033_02695	SH-B11_02771	TUAT1_02689
group_336		hypothetical protein	6	6	1	2	1042				1082	1082	1082	C4_00374	GR8_01469	HM-7_02538	MTCC-B6033_00472	SH-B11_00484	TUAT1_00497
obg		GTPase Obg	6	6	1	2	5360				1286	1286	1286	C4_02379	GR8_03476	HM-7_00762	MTCC-B6033_02568	SH-B11_02640	TUAT1_02513
leuA_2		2-isopropylmalate synthase	6	6	1	2	5321				1553	1553	1553	C4_02419	GR8_03513	HM-7_00802	MTCC-B6033_02605	SH-B11_02680	TUAT1_02550
group_3362		hypothetical protein	6	6	1	2	1850				137	137	137	C4_01052	GR8_02150	HM-7_03365	MTCC-B6033_01227	SH-B11_01204	TUAT1_01184
group_3363	rnmV_1	Ribonuclease M5	6	6	1	2	3803				560	560	560	C4_03718	GR8_01042	HM-7_02104	MTCC-B6033_00054	SH-B11_00056	TUAT1_00054
group_3364		hypothetical protein	6	6	1	2	1958				617	617	617	C4_01110	GR8_02199	HM-7_03424	MTCC-B6033_01287	SH-B11_01257	TUAT1_01237
ssbA		Single-stranded DNA-binding protein A	6	6	1	2	3864				542	542	542	C4_03656	GR8_00971	HM-7_02032	MTCC-B6033_03875	SH-B11_03951	TUAT1_03836
gpsB		Cell cycle protein GpsB	6	6	1	2	3061				305	305	305	C4_01888	GR8_02985	HM-7_00262	MTCC-B6033_02072	SH-B11_02082	TUAT1_02014
pgk		Phosphoglycerate kinase	6	6	1	2	4619				1184	1184	1184	C4_03003	GR8_00320	HM-7_01396	MTCC-B6033_03213	SH-B11_03278	TUAT1_03202
rplC		50S ribosomal protein L3	6	6	1	2	3729				629	629	629	C4_00033	GR8_01133	HM-7_02195	MTCC-B6033_00146	SH-B11_00147	TUAT1_00145
group_3369		hypothetical protein	6	6	1	2	5439				134	134	134	C4_02305	GR8_03403	HM-7_00689	MTCC-B6033_02495	SH-B11_02567	TUAT1_02440
group_337		hypothetical protein	6	6	1	2	1045				851	851	851	C4_00375	GR8_01470	HM-7_02539	MTCC-B6033_00473	SH-B11_00485	TUAT1_00498
group_3370		hypothetical protein	6	6	1	2	3338				242	242	242	C4_02147	GR8_03244	HM-7_00522	MTCC-B6033_02332	SH-B11_02344	TUAT1_02274
group_3371		hypothetical protein	6	6	1	2	1854				257	257	257	C4_01055	GR8_02153	HM-7_03368	MTCC-B6033_01230	SH-B11_01207	TUAT1_01187
ispF		2-C-methyl-D-erythritol 2,4-cyclodiphosphate synthase	6	6	1	2	3753				476	476	476	C4_00009	GR8_01109	HM-7_02171	MTCC-B6033_00122	SH-B11_00123	TUAT1_00121
group_3373		hypothetical protein	6	6	1	2	936				329	329	329	C4_00281	GR8_01373	HM-7_02442	MTCC-B6033_00382	SH-B11_00383	TUAT1_00398
mrpF		Na(+)/H(+) antiporter subunit F	6	6	1	2	4866				281	281	281	C4_02791	GR8_00107	HM-7_01183	MTCC-B6033_03000	SH-B11_03076	TUAT1_02985
group_3375		hypothetical protein	6	6	1	2	3272				110	110	110	C4_02089	GR8_03187	HM-7_00464	MTCC-B6033_02275	SH-B11_02287	TUAT1_02217
mreB_1		Rod shape-determining protein MreB	6	6	1	2	2198				1007	1007	1007	C4_01287	GR8_02376	HM-7_03600	MTCC-B6033_01467	SH-B11_01484	TUAT1_01415
yabG		Sporulation-specific protease YabG	6	6	1	2	3801				884	884	884	C4_03720	GR8_01044	HM-7_02106	MTCC-B6033_00056	SH-B11_00058	TUAT1_00056
chrA1_2		Chromate transport protein	6	6	1	2	4387				533	533	533	C4_03205	GR8_00528	HM-7_01600	MTCC-B6033_03419	SH-B11_03485	TUAT1_03400
rplT		50S ribosomal protein L20	6	6	1	2	5202				359	359	359	C4_02474	GR8_03572	HM-7_00858	MTCC-B6033_02667	SH-B11_02740	TUAT1_02661
gloA_2		Lactoylglutathione lyase	6	6	1	2	4140				383	383	383	C4_03417	GR8_00739	HM-7_01802	MTCC-B6033_03623	SH-B11_03708	TUAT1_03609
atpD		ATP synthase subunit beta	6	6	1	2	4337				1421	1421	1421	C4_03255	GR8_00578	HM-7_01650	MTCC-B6033_03463	SH-B11_03530	TUAT1_03450
ytcD		putative HTH-type transcriptional regulator YtcD	6	6	1	2	5057				371	371	371	C4_02606	GR8_03705	HM-7_00989	MTCC-B6033_02800	SH-B11_02876	TUAT1_02791
ffh		Signal recognition particle protein	6	6	1	2	2360				1343	1343	1343	C4_01442	GR8_02531	HM-7_03755	MTCC-B6033_01622	SH-B11_01639	TUAT1_01569
udk		Uridine kinase	6	6	1	2	5429				632	632	632	C4_02315	GR8_03413	HM-7_00699	MTCC-B6033_02505	SH-B11_02577	TUAT1_02450
rplL		50S ribosomal protein L7/L12	6	6	1	2	3740				365	365	365	C4_00022	GR8_01122	HM-7_02184	MTCC-B6033_00135	SH-B11_00136	TUAT1_00134
fur		Ferric uptake regulation protein	6	6	1	2	3199				452	452	452	C4_02022	GR8_03119	HM-7_00396	MTCC-B6033_02206	SH-B11_02216	TUAT1_02149
pyrD		Dihydroorotate dehydrogenase B (NAD(+)), catalytic subunit	6	6	1	2	2315				932	932	932	C4_01399	GR8_02488	HM-7_03712	MTCC-B6033_01579	SH-B11_01596	TUAT1_01526
infB		Translation initiation factor IF-2	6	6	1	2	2430				2120	2120	2120	C4_01512	GR8_02601	HM-7_03825	MTCC-B6033_01693	SH-B11_01709	TUAT1_01639
yocH_2		Cell wall-binding protein YocH	6	6	1	2	2742				791	791	791	C4_01790	GR8_02887	HM-7_04107	MTCC-B6033_01973	SH-B11_01981	TUAT1_01913
group_3390		hypothetical protein	6	6	1	2	5090				446	446	446	C4_02576	GR8_03675	HM-7_00959	MTCC-B6033_02770	SH-B11_02846	TUAT1_02761
yneA		Cell division suppressor protein YneA	6	6	1	2	2564				311	311	311	C4_01626	GR8_02722	HM-7_03942	MTCC-B6033_01809	SH-B11_01822	TUAT1_01757
bdbD		Disulfide bond formation protein D	6	6	1	2	4675				686	686	686	C4_02956	GR8_00273	HM-7_01349	MTCC-B6033_03167	SH-B11_03232	TUAT1_03155
ppnKA		NAD kinase 1	6	6	1	2	1827				800	800	800	C4_01031	GR8_02129	HM-7_03344	MTCC-B6033_01206	SH-B11_01183	TUAT1_01163
group_3394		hypothetical protein	6	6	1	2	2399				269	269	269	C4_01481	GR8_02570	HM-7_03794	MTCC-B6033_01661	SH-B11_01678	TUAT1_01608
ytzE		putative HTH-type transcriptional regulator YtzE	6	6	1	2	5073				221	221	221	C4_02591	GR8_03690	HM-7_00974	MTCC-B6033_02785	SH-B11_02861	TUAT1_02776
fin		Anti-sigma-F factor Fin	6	6	1	2	3790				230	230	230	C4_03731	GR8_01055	HM-7_02117	MTCC-B6033_00067	SH-B11_00069	TUAT1_00067
group_3397		hypothetical protein	6	6	1	2	1613				209	209	209	C4_00863	GR8_01956	HM-7_03175	MTCC-B6033_00980	SH-B11_01014	TUAT1_00994
group_3398		hypothetical protein	6	6	1	2	3917				170	170	170	C4_03606	GR8_00922	HM-7_01982	MTCC-B6033_03825	SH-B11_03897	TUAT1_03787
rpmG2		50S ribosomal protein L33 2	6	6	1	2	4352				149	149	149	C4_03240	GR8_00563	HM-7_01635	MTCC-B6033_03448	SH-B11_03515	TUAT1_03435
yxlF_2		putative ABC transporter ATP-binding protein YxlF	6	6	1	2	1065				926	926	926	C4_00395	GR8_01494	HM-7_02559	MTCC-B6033_00493	SH-B11_00506	TUAT1_00520
fusA		Elongation factor G	6	6	1	2	3733				2078	2078	2078	C4_00029	GR8_01129	HM-7_02191	MTCC-B6033_00142	SH-B11_00143	TUAT1_00141
yodB_3		HTH-type transcriptional regulator YodB	6	6	1	2	4095				332	332	332	C4_03458	GR8_00780	HM-7_01843	MTCC-B6033_03664	SH-B11_03749	TUAT1_03650
soj		Sporulation initiation inhibitor protein Soj	6	6	1	2	3855				800	800	800	C4_03665	GR8_00980	HM-7_02041	MTCC-B6033_03884	SH-B11_03960	TUAT1_03845
rpsT		30S ribosomal protein S20	6	6	1	2	3422				266	266	266	C4_02226	GR8_03323	HM-7_00601	MTCC-B6033_02411	SH-B11_02424	TUAT1_02353
group_3404		hypothetical protein	6	6	1	2	1848				128	128	128	C4_01050	GR8_02148	HM-7_03363	MTCC-B6033_01225	SH-B11_01202	TUAT1_01182
group_3405		hypothetical protein	6	6	1	2	4951				155	155	155	C4_02717	GR8_00033	HM-7_01109	MTCC-B6033_02923	SH-B11_03001	TUAT1_02911
group_3406		hypothetical protein	6	6	1	2	5397				170	170	170	C4_02345	GR8_03442	HM-7_00728	MTCC-B6033_02534	SH-B11_02606	TUAT1_02479
group_3407		hypothetical protein	6	6	1	2	2583				287	287	287	C4_01645	GR8_02741	HM-7_03961	MTCC-B6033_01828	SH-B11_01841	TUAT1_01776
glpE_1		Thiosulfate sulfurtransferase GlpE	6	6	1	2	813				968	968	968	C4_00171	GR8_01263	HM-7_02330	MTCC-B6033_00272	SH-B11_00274	TUAT1_00287
group_3409		hypothetical protein	6	6	1	2	4740				137	137	137	C4_02895	GR8_00214	HM-7_01289	MTCC-B6033_03107	SH-B11_03181	TUAT1_03096
rsbT		Serine/threonine-protein kinase RsbT	6	6	1	2	1089				401	401	401	C4_00415	GR8_01514	HM-7_02579	MTCC-B6033_00513	SH-B11_00526	TUAT1_00540
tepA		Translocation-enhancing protein TepA	6	6	1	2	2448				728	728	728	C4_01529	GR8_02618	HM-7_03842	MTCC-B6033_01710	SH-B11_01726	TUAT1_01656
group_3411		hypothetical protein	6	6	1	2	1849				221	221	221	C4_01051	GR8_02149	HM-7_03364	MTCC-B6033_01226	SH-B11_01203	TUAT1_01183
rplS		50S ribosomal protein L19	6	6	1	2	2366				347	347	347	C4_01448	GR8_02537	HM-7_03761	MTCC-B6033_01628	SH-B11_01645	TUAT1_01575
blaI		Transcriptional regulator BlaI	6	6	1	2	1721				422	422	422	C4_00932	GR8_02025	HM-7_03245	MTCC-B6033_01107	SH-B11_01084	TUAT1_01064
mraY		Phospho-N-acetylmuramoyl-pentapeptide-transferase	6	6	1	2	2276				974	974	974	C4_01360	GR8_02449	HM-7_03673	MTCC-B6033_01540	SH-B11_01557	TUAT1_01487
purU		Formyltetrahydrofolate deformylase	6	6	1	2	2002				902	902	902	C4_01153	GR8_02243	HM-7_03467	MTCC-B6033_01330	SH-B11_01300	TUAT1_01280
group_3416		hypothetical protein	6	6	1	2	4373				125	125	125	C4_03219	GR8_00542	HM-7_01614	MTCC-B6033_03433	SH-B11_03499	TUAT1_03414
gmk		Guanylate kinase	6	6	1	2	2331				614	614	614	C4_01414	GR8_02503	HM-7_03727	MTCC-B6033_01594	SH-B11_01611	TUAT1_01541
ricR		Copper-sensing transcriptional repressor RicR	6	6	1	2	791				260	260	260	C4_00153	GR8_01246	HM-7_02312	MTCC-B6033_00254	SH-B11_00256	TUAT1_00270
ebrA		Multidrug resistance protein EbrA	6	6	1	2	2490				320	320	320	C4_01568	GR8_02657	HM-7_03880	MTCC-B6033_01749	SH-B11_01767	TUAT1_01695
rsbU		Phosphoserine phosphatase RsbU	6	6	1	2	1090				1007	1007	1007	C4_00416	GR8_01515	HM-7_02580	MTCC-B6033_00514	SH-B11_00527	TUAT1_00541
fbaA		putative fructose-bisphosphate aldolase	6	6	1	2	4308				857	857	857	C4_03284	GR8_00607	HM-7_01679	MTCC-B6033_03492	SH-B11_03559	TUAT1_03479
pdhB		Pyruvate dehydrogenase E1 component subunit beta	6	6	1	2	2211				977	977	977	C4_01300	GR8_02389	HM-7_03613	MTCC-B6033_01480	SH-B11_01497	TUAT1_01428
group_3422		hypothetical protein	6	6	1	2	3424				134	134	134	C4_02228	GR8_03325	HM-7_00603	MTCC-B6033_02413	SH-B11_02426	TUAT1_02355
mutX		8-oxo-dGTP diphosphatase	6	6	1	2	4552				464	464	464	C4_03058	GR8_00380	HM-7_01452	MTCC-B6033_03269	SH-B11_03335	TUAT1_03253
group_3424		hypothetical protein	6	6	1	2	4897				236	236	236	C4_02763	GR8_00079	HM-7_01155	MTCC-B6033_02972	SH-B11_03047	TUAT1_02957
group_3425		hypothetical protein	6	6	1	2	2330				269	269	269	C4_01413	GR8_02502	HM-7_03726	MTCC-B6033_01593	SH-B11_01610	TUAT1_01540
group_3426		hypothetical protein	6	6	1	2	2569				218	218	218	C4_01631	GR8_02727	HM-7_03947	MTCC-B6033_01814	SH-B11_01827	TUAT1_01762
group_3427		hypothetical protein	6	6	1	2	4117				113	113	113	C4_03438	GR8_00760	HM-7_01823	MTCC-B6033_03644	SH-B11_03729	TUAT1_03630
mgsR_2		Regulatory protein MgsR	6	6	1	2	4744				359	359	359	C4_02891	GR8_00210	HM-7_01285	MTCC-B6033_03103	SH-B11_03177	TUAT1_03092
fliE		Flagellar hook-basal body complex protein FliE	6	6	1	2	2382				317	317	317	C4_01464	GR8_02553	HM-7_03777	MTCC-B6033_01644	SH-B11_01661	TUAT1_01591
rpsA		30S ribosomal protein S1	6	6	1	2	1096				2159	2159	2159	C4_00421	GR8_01520	HM-7_02585	MTCC-B6033_00519	SH-B11_00532	TUAT1_00546
sigG		RNA polymerase sigma-G factor	6	6	1	2	2290				779	779	779	C4_01374	GR8_02463	HM-7_03687	MTCC-B6033_01554	SH-B11_01571	TUAT1_01501
whiA		Sporulation transcription regulator WhiA	6	6	1	2	4555				950	950	950	C4_03055	GR8_00377	HM-7_01449	MTCC-B6033_03266	SH-B11_03332	TUAT1_03250
group_3432		hypothetical protein	6	6	1	2	1192				194	194	194	C4_00497	GR8_01591	HM-7_02662	MTCC-B6033_00605	SH-B11_00617	TUAT1_00622
group_3433		hypothetical protein	6	6	1	2	3042				182	182	182	C4_01870	GR8_02967	HM-7_00244	MTCC-B6033_02055	SH-B11_02064	TUAT1_01995
rpmI		50S ribosomal protein L35	6	6	1	2	5201				200	200	200	C4_02475	GR8_03573	HM-7_00859	MTCC-B6033_02668	SH-B11_02741	TUAT1_02662
group_3435		hypothetical protein	6	6	1	2	4748				302	302	302	C4_02887	GR8_00206	HM-7_01281	MTCC-B6033_03099	SH-B11_03173	TUAT1_03088
group_3436		hypothetical protein	6	6	1	2	2739				539	539	539	C4_01788	GR8_02884	HM-7_04104	MTCC-B6033_01971	SH-B11_01979	TUAT1_01910
group_3437		hypothetical protein	6	6	1	2	2026				155	155	155	C4_01174	GR8_02264	HM-7_03488	MTCC-B6033_01353	SH-B11_01323	TUAT1_01302
sspE		Small, acid-soluble spore protein gamma-type	6	6	1	2	1492				167	167	167	C4_00737	GR8_01827	HM-7_03048	MTCC-B6033_00857	SH-B11_00887	TUAT1_00865
group_3439		hypothetical protein	6	6	1	2	4848				299	299	299	C4_02808	GR8_00124	HM-7_01200	MTCC-B6033_03017	SH-B11_03093	TUAT1_03002
gapA		Glyceraldehyde-3-phosphate dehydrogenase 1	6	6	1	2	4618				1007	1007	1007	C4_03004	GR8_00321	HM-7_01397	MTCC-B6033_03214	SH-B11_03279	TUAT1_03203
rplB		50S ribosomal protein L2	6	6	1	2	3726				833	833	833	C4_00036	GR8_01136	HM-7_02198	MTCC-B6033_00149	SH-B11_00150	TUAT1_00148
mngA		PTS system 2-O-alpha-mannosyl-D-glycerate-specific EIIABC component	6	6	1	2	830				329	329	329	C4_00184	GR8_01275	HM-7_02341	MTCC-B6033_00287	SH-B11_00285	TUAT1_00299
group_3443		hypothetical protein	6	6	1	2	3295				515	515	515	C4_02112	GR8_03209	HM-7_00487	MTCC-B6033_02297	SH-B11_02309	TUAT1_02239
yfiY_2		putative siderophore-binding lipoprotein YfiY	6	6	1	2	4588				896	896	896	C4_03033	GR8_00350	HM-7_01426	MTCC-B6033_03243	SH-B11_03308	TUAT1_03232
opuCD		Glycine betaine/carnitine/choline transport system permease protein OpuCD	6	6	1	2	4639				689	689	689	C4_02987	GR8_00304	HM-7_01380	MTCC-B6033_03197	SH-B11_03262	TUAT1_03186
yqhS		3-dehydroquinate dehydratase	6	6	1	2	3300				443	443	443	C4_02117	GR8_03214	HM-7_00492	MTCC-B6033_02302	SH-B11_02314	TUAT1_02244
dnaN		DNA polymerase III subunit beta	6	6	1	2	3845				1136	1136	1136	C4_03675	GR8_00990	HM-7_02051	MTCC-B6033_00002	SH-B11_00002	TUAT1_00002
group_3448		hypothetical protein	6	6	1	2	4042				371	371	371	C4_03507	GR8_00829	HM-7_01889	MTCC-B6033_03715	SH-B11_03798	TUAT1_03696
ccpN		Transcriptional repressor CcpN	6	6	1	2	3389				710	710	710	C4_02195	GR8_03292	HM-7_00570	MTCC-B6033_02380	SH-B11_02392	TUAT1_02322
cspC		Cold shock protein CspC	6	6	1	2	1120				203	203	203	C4_00436	GR8_01533	HM-7_02600	MTCC-B6033_00537	SH-B11_00551	TUAT1_00561
group_3450		hypothetical protein	6	6	1	2	4079				266	266	266	C4_03472	GR8_00795	HM-7_01857	MTCC-B6033_03678	SH-B11_03763	TUAT1_03664
rplM		50S ribosomal protein L13	6	6	1	2	3696				437	437	437	C4_00066	GR8_01166	HM-7_02228	MTCC-B6033_00179	SH-B11_00180	TUAT1_00178
flgG_3		Flagellar basal-body rod protein FlgG	6	6	1	2	4374				839	839	839	C4_03218	GR8_00541	HM-7_01613	MTCC-B6033_03432	SH-B11_03498	TUAT1_03413
group_3453		hypothetical protein	6	6	1	2	2770				218	218	218	C4_01815	GR8_02912	HM-7_04132	MTCC-B6033_02000	SH-B11_02007	TUAT1_01939
ilvE		Branched-chain-amino-acid aminotransferase	6	6	1	2	5317				914	914	914	C4_02423	GR8_03517	HM-7_00806	MTCC-B6033_02609	SH-B11_02684	TUAT1_02554
group_3455		hypothetical protein	6	6	1	2	1489				224	224	224	C4_00735	GR8_01825	HM-7_03046	MTCC-B6033_00855	SH-B11_00885	TUAT1_00863
yisI		Aspartyl-phosphate phosphatase YisI	6	6	1	2	1736				161	161	161	C4_00947	GR8_02040	HM-7_03260	MTCC-B6033_01122	SH-B11_01099	TUAT1_01079
rpsU		30S ribosomal protein S21	6	6	1	2	3408				173	173	173	C4_02212	GR8_03309	HM-7_00587	MTCC-B6033_02397	SH-B11_02410	TUAT1_02339
group_3458		hypothetical protein	6	6	1	2	1740				368	368	368	C4_00951	GR8_02044	HM-7_03264	MTCC-B6033_01126	SH-B11_01103	TUAT1_01083
group_3459		hypothetical protein	6	6	1	2	5310				143	143	143	C4_02430	GR8_03524	HM-7_00813	MTCC-B6033_02616	SH-B11_02691	TUAT1_02561
pgsA		CDP-diacylglycerol--glycerol-3-phosphate 3-phosphatidyltransferase	6	6	1	2	2463				581	581	581	C4_01543	GR8_02632	HM-7_03856	MTCC-B6033_01724	SH-B11_01740	TUAT1_01670
atpE_2		ATP synthase subunit c	6	6	1	2	4332				212	212	212	C4_03260	GR8_00583	HM-7_01655	MTCC-B6033_03468	SH-B11_03535	TUAT1_03455
mreC		Cell shape-determining protein MreC	6	6	1	2	5350				899	899	899	C4_02389	GR8_03486	HM-7_00772	MTCC-B6033_02578	SH-B11_02650	TUAT1_02523
gerPD		putative spore germination protein GerPD	6	6	1	2	1732				176	176	176	C4_00943	GR8_02036	HM-7_03256	MTCC-B6033_01118	SH-B11_01095	TUAT1_01075
spoIVA		Stage IV sporulation protein A	6	6	1	2	3125				1478	1478	1478	C4_01949	GR8_03047	HM-7_00323	MTCC-B6033_02134	SH-B11_02144	TUAT1_02076
rpmE2		50S ribosomal protein L31 type B	6	6	1	2	5004				242	242	242	C4_02657	GR8_03754	HM-7_01039	MTCC-B6033_02850	SH-B11_02927	TUAT1_02841
rpoZ		DNA-directed RNA polymerase subunit omega	6	6	1	2	2332				203	203	203	C4_01415	GR8_02504	HM-7_03728	MTCC-B6033_01595	SH-B11_01612	TUAT1_01542
group_3467		hypothetical protein	6	6	1	2	4589				224	224	224	C4_03032	GR8_00349	HM-7_01425	MTCC-B6033_03242	SH-B11_03307	TUAT1_03231
atpH		ATP synthase subunit delta	6	6	1	2	4334				545	545	545	C4_03258	GR8_00581	HM-7_01653	MTCC-B6033_03466	SH-B11_03533	TUAT1_03453
group_3469		hypothetical protein	6	6	1	2	1784				194	194	194	C4_00995	GR8_02088	HM-7_03308	MTCC-B6033_01170	SH-B11_01147	TUAT1_01127
cpo		Non-heme chloroperoxidase	6	6	1	2	1141				893	893	893	C4_00449	GR8_01544	HM-7_02613	MTCC-B6033_00554	SH-B11_00566	TUAT1_00575
dnaI		Primosomal protein DnaI	6	6	1	2	5191				929	929	929	C4_02483	GR8_03581	HM-7_00867	MTCC-B6033_02676	SH-B11_02752	TUAT1_02670
group_3471		hypothetical protein	6	6	1	2	2069				188	188	188	C4_01213	GR8_02304	HM-7_03527	MTCC-B6033_01392	SH-B11_01362	TUAT1_01342
group_3472		hypothetical protein	6	6	1	2	5049				329	329	329	C4_02614	GR8_03713	HM-7_00997	MTCC-B6033_02808	SH-B11_02884	TUAT1_02799
tpx		putative thiol peroxidase	6	6	1	2	5151				500	500	500	C4_02521	GR8_03620	HM-7_00905	MTCC-B6033_02715	SH-B11_02791	TUAT1_02709
emrK		putative multidrug resistance protein EmrK	6	6	1	2	1544				632	632	632	C4_00799	GR8_01891	HM-7_03111	MTCC-B6033_00918	SH-B11_00952	TUAT1_00931
purA		Adenylosuccinate synthetase	6	6	1	2	3894				1295	1295	1295	C4_03627	GR8_00943	HM-7_02003	MTCC-B6033_03846	SH-B11_03918	TUAT1_03808
ispG		4-hydroxy-3-methylbut-2-en-1-yl diphosphate synthase (flavodoxin)	6	6	1	2	3369				1115	1115	1115	C4_02175	GR8_03272	HM-7_00550	MTCC-B6033_02360	SH-B11_02372	TUAT1_02302
frr		Ribosome-recycling factor	6	6	1	2	2415				557	557	557	C4_01497	GR8_02586	HM-7_03810	MTCC-B6033_01677	SH-B11_01694	TUAT1_01624
group_3478		hypothetical protein	6	6	1	2	4829				125	125	125	C4_02826	GR8_00142	HM-7_01218	MTCC-B6033_03035	SH-B11_03111	TUAT1_03020
group_3479		hypothetical protein	6	6	1	2	5380				200	200	200	C4_02361	GR8_03458	HM-7_00744	MTCC-B6033_02550	SH-B11_02622	TUAT1_02495
qacR		HTH-type transcriptional regulator QacR	6	6	1	2	1143				605	605	605	C4_00452	GR8_01546	HM-7_02615	MTCC-B6033_00556	SH-B11_00569	TUAT1_00577
group_3480		hypothetical protein	6	6	1	2	2293				431	431	431	C4_01377	GR8_02466	HM-7_03690	MTCC-B6033_01557	SH-B11_01574	TUAT1_01504
mhqR_2		HTH-type transcriptional regulator MhqR	6	6	1	2	2028				461	461	461	C4_01176	GR8_02266	HM-7_03490	MTCC-B6033_01355	SH-B11_01325	TUAT1_01304
group_3482		hypothetical protein	6	6	1	2	3177				344	344	344	C4_02000	GR8_03097	HM-7_00374	MTCC-B6033_02184	SH-B11_02194	TUAT1_02127
argR		Arginine repressor	6	6	1	2	3278				449	449	449	C4_02095	GR8_03192	HM-7_00470	MTCC-B6033_02280	SH-B11_02292	TUAT1_02222
hfq		RNA-binding protein Hfq	6	6	1	2	2495				221	221	221	C4_01573	GR8_02662	HM-7_03885	MTCC-B6033_01754	SH-B11_01772	TUAT1_01700
group_3485		hypothetical protein	6	6	1	2	3074				104	104	104	C4_01899	GR8_02997	HM-7_00273	MTCC-B6033_02084	SH-B11_02094	TUAT1_02026
perR		Peroxide operon regulator	6	6	1	2	1504				521	521	521	C4_00749	GR8_01839	HM-7_03060	MTCC-B6033_00869	SH-B11_00899	TUAT1_00877
rimP		Ribosome maturation factor RimP	6	6	1	2	2426				473	473	473	C4_01508	GR8_02597	HM-7_03821	MTCC-B6033_01689	SH-B11_01705	TUAT1_01635
rsfA_1		Prespore-specific transcriptional regulator RsfA	6	6	1	2	2265				539	539	539	C4_01349	GR8_02438	HM-7_03662	MTCC-B6033_01529	SH-B11_01546	TUAT1_01477
infA		Translation initiation factor IF-1	6	6	1	2	3706				218	218	218	C4_00056	GR8_01156	HM-7_02218	MTCC-B6033_00169	SH-B11_00170	TUAT1_00168
tetA_1		Tetracycline resistance protein, class B	6	6	1	2	1145				1196	1202	1201	C4_00453	GR8_01547	HM-7_02616	MTCC-B6033_00557	SH-B11_00570	TUAT1_00578
group_3490		hypothetical protein	6	6	1	2	1275				692	692	692	C4_00564	GR8_01658	HM-7_02879	MTCC-B6033_00678	SH-B11_00717	TUAT1_00698
group_3491		hypothetical protein	6	6	1	2	3439				149	149	149	C4_02241	GR8_03338	HM-7_00616	MTCC-B6033_02426	SH-B11_02439	TUAT1_02368
liaR_2		Transcriptional regulatory protein LiaR	6	6	1	2	4718				635	635	635	C4_02914	GR8_00232	HM-7_01308	MTCC-B6033_03126	SH-B11_03199	TUAT1_03114
group_3493		hypothetical protein	6	6	1	2	2216				269	269	269	C4_01305	GR8_02394	HM-7_03618	MTCC-B6033_01485	SH-B11_01502	TUAT1_01433
yvyD		Ribosome hibernation promotion factor	6	6	1	2	4495				563	563	563	C4_03115	GR8_00438	HM-7_01509	MTCC-B6033_03325	SH-B11_03391	TUAT1_03310
rpmA		50S ribosomal protein L27	6	6	1	2	5358				284	284	284	C4_02381	GR8_03478	HM-7_00764	MTCC-B6033_02570	SH-B11_02642	TUAT1_02515
group_3496		hypothetical protein	6	6	1	2	1575				248	248	248	C4_00829	GR8_01921	HM-7_03141	MTCC-B6033_00948	SH-B11_00982	TUAT1_00961
group_3497		Small, acid-soluble spore protein 1	6	6	1	2	5125				212	212	212	C4_02541	GR8_03644	HM-7_00928	MTCC-B6033_02737	SH-B11_02815	TUAT1_02730
group_3498		hypothetical protein	6	6	1	2	4989			Hypothetical protein with no hits to refseq/uniprot/clusters/cdd/tigrfams/pfam overlapping another protein with hits	188	188	188	C4_02686	GR8_00002	HM-7_01078	MTCC-B6033_02889	SH-B11_02968	TUAT1_02880
rsiW		Anti-sigma-W factor RsiW	6	6	1	2	718				626	626	626	C4_00106	GR8_01198	HM-7_02261	MTCC-B6033_00211	SH-B11_00212	TUAT1_00216
group_3500		hypothetical protein	6	6	1	2	2205				209	209	209	C4_01294	GR8_02383	HM-7_03607	MTCC-B6033_01474	SH-B11_01491	TUAT1_01422
group_3501		hypothetical protein	6	6	1	2	3027				527	527	527	C4_01856	GR8_02953	HM-7_00230	MTCC-B6033_02041	SH-B11_02048	TUAT1_01980
group_3502		hypothetical protein	6	6	1	2	5420				284	284	284	C4_02324	GR8_03421	HM-7_00707	MTCC-B6033_02513	SH-B11_02585	TUAT1_02458
rplU		50S ribosomal protein L21	6	6	1	2	5356				308	308	308	C4_02383	GR8_03480	HM-7_00766	MTCC-B6033_02572	SH-B11_02644	TUAT1_02517
capC		Capsule biosynthesis protein CapC	6	6	1	2	4407				449	449	449	C4_03188	GR8_00511	HM-7_01583	MTCC-B6033_03402	SH-B11_03468	TUAT1_03383
yhhQ		Inner membrane protein YhhQ	6	6	1	2	3044				689	689	689	C4_01872	GR8_02969	HM-7_00246	MTCC-B6033_02057	SH-B11_02066	TUAT1_01997
group_3506		hypothetical protein	6	6	1	2	3355				347	347	347	C4_02161	GR8_03258	HM-7_00536	MTCC-B6033_02346	SH-B11_02358	TUAT1_02288
group_3507		hypothetical protein	6	6	1	2	1347				110	110	110	C4_00619	GR8_01709	HM-7_02931	MTCC-B6033_00734	SH-B11_00771	TUAT1_00752
ndoA		Endoribonuclease EndoA	6	6	1	2	1086				350	350	350	C4_00412	GR8_01511	HM-7_02576	MTCC-B6033_00510	SH-B11_00523	TUAT1_00537
greA		Transcription elongation factor GreA	6	6	1	2	5430				473	473	473	C4_02314	GR8_03412	HM-7_00698	MTCC-B6033_02504	SH-B11_02576	TUAT1_02449
group_351		hypothetical protein	6	6	1	2	1158				623	623	623	C4_00461	GR8_01555	HM-7_02624	MTCC-B6033_00569	SH-B11_00582	TUAT1_00586
sspJ		Small, acid-soluble spore protein J	6	6	1	2	4686				143	143	143	C4_02945	GR8_00262	HM-7_01338	MTCC-B6033_03156	SH-B11_03221	TUAT1_03144
atpG		ATP synthase gamma chain	6	6	1	2	4336				866	866	866	C4_03256	GR8_00579	HM-7_01651	MTCC-B6033_03464	SH-B11_03531	TUAT1_03451
group_3512		hypothetical protein	6	6	1	2	1542				1895	1895	1895	C4_00797	GR8_01889	HM-7_03109	MTCC-B6033_00916	SH-B11_00950	TUAT1_00929
gatC_1		Aspartyl/glutamyl-tRNA(Asn/Gln) amidotransferase subunit C	6	6	1	2	1277				290	290	290	C4_00566	GR8_01660	HM-7_02881	MTCC-B6033_00680	SH-B11_00719	TUAT1_00700
group_3514		hypothetical protein	6	6	1	2	2298				236	236	236	C4_01382	GR8_02471	HM-7_03695	MTCC-B6033_01562	SH-B11_01579	TUAT1_01509
group_3515		hypothetical protein	6	6	1	2	4330				383	383	383	C4_03262	GR8_00585	HM-7_01657	MTCC-B6033_03470	SH-B11_03537	TUAT1_03457
yhcN_1		Lipoprotein YhcN	6	6	1	2	1553				506	506	506	C4_00807	GR8_01899	HM-7_03119	MTCC-B6033_00926	SH-B11_00960	TUAT1_00939
group_3517		hypothetical protein	6	6	1	2	1501				1073	1073	1073	C4_00746	GR8_01836	HM-7_03057	MTCC-B6033_00866	SH-B11_00896	TUAT1_00874
group_3518		hypothetical protein	6	6	1	2	5348				689	689	689	C4_02391	GR8_03488	HM-7_00774	MTCC-B6033_02580	SH-B11_02652	TUAT1_02525
tal		Transaldolase	6	6	1	2	4309				638	638	638	C4_03283	GR8_00606	HM-7_01678	MTCC-B6033_03491	SH-B11_03558	TUAT1_03478
gerAA_2		Spore germination protein A1	6	6	1	2	3184				1472	1472	1472	C4_02007	GR8_03104	HM-7_00381	MTCC-B6033_02191	SH-B11_02201	TUAT1_02134
cdd		Cytidine deaminase	6	6	1	2	3395				398	398	398	C4_02201	GR8_03298	HM-7_00576	MTCC-B6033_02386	SH-B11_02398	TUAT1_02328
clpC		Negative regulator of genetic competence ClpC/MecB	6	6	1	2	3758				2435	2435	2435	C4_00004	GR8_01104	HM-7_02166	MTCC-B6033_00117	SH-B11_00118	TUAT1_00116
rpoA		DNA-directed RNA polymerase subunit alpha	6	6	1	2	3702				944	944	944	C4_00060	GR8_01160	HM-7_02222	MTCC-B6033_00173	SH-B11_00174	TUAT1_00172
group_3524		hypothetical protein	6	6	1	2	3861				206	206	206	C4_03659	GR8_00974	HM-7_02035	MTCC-B6033_03878	SH-B11_03954	TUAT1_03839
sucC		Succinate--CoA ligase [ADP-forming] subunit beta	6	6	1	2	2371				1160	1160	1160	C4_01453	GR8_02542	HM-7_03766	MTCC-B6033_01633	SH-B11_01650	TUAT1_01580
spoVT		Stage V sporulation protein T	6	6	1	2	3788				536	536	536	C4_03733	GR8_01057	HM-7_02119	MTCC-B6033_00069	SH-B11_00071	TUAT1_00069
ykuV		Thiol-disulfide oxidoreductase YkuV	6	6	1	2	2173				458	458	458	C4_01265	GR8_02353	HM-7_03578	MTCC-B6033_01444	SH-B11_01462	TUAT1_01393
ywaC		GTP pyrophosphokinase YwaC	6	6	1	2	4134				632	632	632	C4_03423	GR8_00745	HM-7_01808	MTCC-B6033_03629	SH-B11_03714	TUAT1_03615
ytrB		ABC transporter ATP-binding protein YtrB	6	6	1	2	5041				878	878	878	C4_02621	GR8_03719	HM-7_01003	MTCC-B6033_02814	SH-B11_02891	TUAT1_02805
cheY		Chemotaxis protein CheY	6	6	1	2	2396				362	362	362	C4_01478	GR8_02567	HM-7_03791	MTCC-B6033_01658	SH-B11_01675	TUAT1_01605
group_3531		hypothetical protein	6	6	1	2	4932				98	98	98	C4_02733	GR8_00049	HM-7_01125	MTCC-B6033_02940	SH-B11_03017	TUAT1_02927
rpsN1		30S ribosomal protein S14	6	6	1	2	3716				185	185	185	C4_00046	GR8_01146	HM-7_02208	MTCC-B6033_00159	SH-B11_00160	TUAT1_00158
nusG		Transcription termination/antitermination protein NusG	6	6	1	2	3744				533	533	533	C4_00018	GR8_01118	HM-7_02180	MTCC-B6033_00131	SH-B11_00132	TUAT1_00130
arsR1		Arsenic resistance transcriptional regulator ArsR1	6	6	1	2	787				323	323	323	C4_00150	GR8_01243	HM-7_02308	MTCC-B6033_00251	SH-B11_00253	TUAT1_00267
bdbC		Disulfide bond formation protein C	6	6	1	2	4676				413	413	413	C4_02955	GR8_00272	HM-7_01348	MTCC-B6033_03166	SH-B11_03231	TUAT1_03154
nucB_2		Sporulation-specific extracellular nuclease	6	6	1	2	2559				434	434	434	C4_01621	GR8_02717	HM-7_03937	MTCC-B6033_01804	SH-B11_01817	TUAT1_01752
coaD		Phosphopantetheine adenylyltransferase	6	6	1	2	2258				482	482	482	C4_01342	GR8_02431	HM-7_03655	MTCC-B6033_01522	SH-B11_01539	TUAT1_01470
group_3538		hypothetical protein	6	6	1	2	1241				554	554	554	C4_00531	GR8_01625	HM-7_02846	MTCC-B6033_00645	SH-B11_00669	TUAT1_00664
tsf		Elongation factor Ts	6	6	1	2	2413				881	881	881	C4_01495	GR8_02584	HM-7_03808	MTCC-B6033_01675	SH-B11_01692	TUAT1_01622
mhqN		Putative NAD(P)H nitroreductase MhqN	6	6	1	2	1164				623	623	623	C4_00465	GR8_01559	HM-7_02628	MTCC-B6033_00573	SH-B11_00586	TUAT1_00590
rplO		50S ribosomal protein L15	6	6	1	2	3710				440	440	440	C4_00052	GR8_01152	HM-7_02214	MTCC-B6033_00165	SH-B11_00166	TUAT1_00164
dapH_2		2,3,4,5-tetrahydropyridine-2,6-dicarboxylate N-acetyltransferase	6	6	1	2	5030				515	515	515	C4_02631	GR8_03728	HM-7_01013	MTCC-B6033_02824	SH-B11_02901	TUAT1_02815
group_3542		hypothetical protein	6	6	1	2	2251				1043	1043	1043	C4_01335	GR8_02424	HM-7_03648	MTCC-B6033_01515	SH-B11_01532	TUAT1_01463
znuC		High-affinity zinc uptake system ATP-binding protein ZnuC	6	6	1	2	3375				776	776	776	C4_02181	GR8_03278	HM-7_00556	MTCC-B6033_02366	SH-B11_02378	TUAT1_02308
guaB_1		Inosine-5'-monophosphate dehydrogenase	6	6	1	2	3838				1466	1466	1466	C4_03683	GR8_01002	HM-7_02064	MTCC-B6033_00014	SH-B11_00014	TUAT1_00014
group_3545		hypothetical protein	6	6	1	2	4492				341	341	341	C4_03118	GR8_00441	HM-7_01512	MTCC-B6033_03328	SH-B11_03394	TUAT1_03313
spxA		Regulatory protein Spx	6	6	1	2	1814				395	395	395	C4_01018	GR8_02116	HM-7_03331	MTCC-B6033_01193	SH-B11_01170	TUAT1_01150
qcrB		Menaquinol-cytochrome c reductase cytochrome b subunit	6	6	1	2	3100				674	674	674	C4_01924	GR8_03022	HM-7_00298	MTCC-B6033_02109	SH-B11_02119	TUAT1_02051
group_3548		hypothetical protein	6	6	1	2	5176				464	464	464	C4_02498	GR8_03596	HM-7_00882	MTCC-B6033_02691	SH-B11_02767	TUAT1_02685
nrgB		Nitrogen regulatory PII-like protein	6	6	1	2	4362				347	347	347	C4_03230	GR8_00553	HM-7_01625	MTCC-B6033_03444	SH-B11_03511	TUAT1_03425
group_355		hypothetical protein	6	6	1	2	1166				293	293	293	C4_00467	GR8_01561	HM-7_02630	MTCC-B6033_00575	SH-B11_00588	TUAT1_00592
ytpP		Thioredoxin-like protein YtpP	6	6	1	2	5092				320	320	320	C4_02574	GR8_03673	HM-7_00957	MTCC-B6033_02768	SH-B11_02844	TUAT1_02759
trmFO		Methylenetetrahydrofolate--tRNA-(uracil-5-)-methyltransferase TrmFO	6	6	1	2	2375				1304	1304	1304	C4_01457	GR8_02546	HM-7_03770	MTCC-B6033_01637	SH-B11_01654	TUAT1_01584
spoIIAA		Anti-sigma F factor antagonist	6	6	1	2	3193				353	353	353	C4_02016	GR8_03113	HM-7_00390	MTCC-B6033_02200	SH-B11_02210	TUAT1_02143
ydbD_2		putative manganese catalase	6	6	1	2	5453				830	830	830	C4_02294	GR8_03389	HM-7_00675	MTCC-B6033_02484	SH-B11_02553	TUAT1_02426
rpmD		50S ribosomal protein L30	6	6	1	2	3711				182	182	182	C4_00051	GR8_01151	HM-7_02213	MTCC-B6033_00164	SH-B11_00165	TUAT1_00163
tgl		Protein-glutamine gamma-glutamyltransferase	6	6	1	2	4912				740	740	740	C4_02750	GR8_00066	HM-7_01142	MTCC-B6033_02957	SH-B11_03034	TUAT1_02944
group_3556		hypothetical protein	6	6	1	2	3130				194	194	194	C4_01954	GR8_03052	HM-7_00328	MTCC-B6033_02139	SH-B11_02149	TUAT1_02081
lipA		Lipoyl synthase	6	6	1	2	4806				896	896	896	C4_02849	GR8_00165	HM-7_01241	MTCC-B6033_03058	SH-B11_03136	TUAT1_03045
cymR		HTH-type transcriptional regulator CymR	6	6	1	2	5402				419	419	419	C4_02340	GR8_03437	HM-7_00723	MTCC-B6033_02529	SH-B11_02601	TUAT1_02474
yhdK		putative anti-sigma-M factor YhdK	6	6	1	2	1584				290	290	290	C4_00838	GR8_01930	HM-7_03150	MTCC-B6033_00957	SH-B11_00990	TUAT1_00970
eamB		Cysteine/O-acetylserine efflux protein	6	6	1	2	1168				587	587	587	C4_00469	GR8_01563	HM-7_02632	MTCC-B6033_00577	SH-B11_00590	TUAT1_00594
qoxA		Quinol oxidase subunit 2	6	6	1	2	4164				956	956	956	C4_03392	GR8_00717	HM-7_01780	MTCC-B6033_03601	SH-B11_03680	TUAT1_03587
group_3561		hypothetical protein	6	6	1	2	5440				161	161	161	C4_02304	GR8_03402	HM-7_00688	MTCC-B6033_02494	SH-B11_02566	TUAT1_02439
group_3562		hypothetical protein	6	6	1	2	2392				215	215	215	C4_01474	GR8_02563	HM-7_03787	MTCC-B6033_01654	SH-B11_01671	TUAT1_01601
ruvA		Holliday junction ATP-dependent DNA helicase RuvA	6	6	1	2	5378				605	605	605	C4_02363	GR8_03460	HM-7_00746	MTCC-B6033_02552	SH-B11_02624	TUAT1_02497
group_3564		hypothetical protein	6	6	1	2	3014				197	197	197	C4_01844	GR8_02941	HM-7_00218	MTCC-B6033_02029	SH-B11_02036	TUAT1_01968
ilvA		L-threonine dehydratase biosynthetic IlvA	6	6	1	2	3020				1268	1268	1268	C4_01850	GR8_02947	HM-7_00224	MTCC-B6033_02035	SH-B11_02042	TUAT1_01974
group_3566		hypothetical protein	6	6	1	2	4822				236	236	236	C4_02833	GR8_00149	HM-7_01225	MTCC-B6033_03042	SH-B11_03120	TUAT1_03029
group_3567		hypothetical protein	6	6	1	2	5441				125	125	125	C4_02303	GR8_03401	HM-7_00687	MTCC-B6033_02493	SH-B11_02565	TUAT1_02438
cdsA		Phosphatidate cytidylyltransferase	6	6	1	2	2417				794	794	794	C4_01499	GR8_02588	HM-7_03812	MTCC-B6033_01679	SH-B11_01696	TUAT1_01626
group_3569		ESAT-6-like protein	6	6	1	2	4838				293	293	293	C4_02817	GR8_00133	HM-7_01209	MTCC-B6033_03026	SH-B11_03102	TUAT1_03011
group_357		hypothetical protein	6	6	1	2	1172				320	320	320	C4_00474	GR8_01567	HM-7_02637	MTCC-B6033_00581	SH-B11_00594	TUAT1_00598
rplQ		50S ribosomal protein L17	6	6	1	2	3701				362	362	362	C4_00061	GR8_01161	HM-7_02223	MTCC-B6033_00174	SH-B11_00175	TUAT1_00173
group_3571		hypothetical protein	6	6	1	2	928				314	314	314	C4_00273	GR8_01365	HM-7_02434	MTCC-B6033_00374	SH-B11_00375	TUAT1_00390
ktrB		Ktr system potassium uptake protein B	6	6	1	2	2038				1346	1346	1346	C4_01185	GR8_02275	HM-7_03499	MTCC-B6033_01364	SH-B11_01334	TUAT1_01313
ychF		Ribosome-binding ATPase YchF	6	6	1	2	3862				1100	1100	1100	C4_03658	GR8_00973	HM-7_02034	MTCC-B6033_03877	SH-B11_03953	TUAT1_03838
sspP		Small, acid-soluble spore protein P	6	6	1	2	2574				149	149	149	C4_01636	GR8_02732	HM-7_03952	MTCC-B6033_01819	SH-B11_01832	TUAT1_01767
group_3575		putative membrane protein	6	6	1	2	2686				602	602	602	C4_01738	GR8_02835	HM-7_04055	MTCC-B6033_01922	SH-B11_01931	TUAT1_01861
yhaX		Stress response protein YhaX	6	6	1	2	1618				866	866	866	C4_00868	GR8_01961	HM-7_03180	MTCC-B6033_00985	SH-B11_01019	TUAT1_00999
rpmF		50S ribosomal protein L32	6	6	1	2	2264				173	173	173	C4_01348	GR8_02437	HM-7_03661	MTCC-B6033_01528	SH-B11_01545	TUAT1_01476
group_3578		hypothetical protein	6	6	1	2	1655				137	137	137	C4_00904	GR8_01997	HM-7_03216	MTCC-B6033_01021	SH-B11_01056	TUAT1_01036
group_3579		hypothetical protein	6	6	1	2	5088				314	314	314	C4_02578	GR8_03677	HM-7_00961	MTCC-B6033_02772	SH-B11_02848	TUAT1_02763
mccF_1		Microcin C7 self-immunity protein MccF	6	6	1	2	1176				620	1019	952	C4_00477	GR8_01570	HM-7_02641	MTCC-B6033_00584	SH-B11_00597	TUAT1_00601
sigF		RNA polymerase sigma-F factor	6	6	1	2	3191				767	767	767	C4_02014	GR8_03111	HM-7_00388	MTCC-B6033_02198	SH-B11_02208	TUAT1_02141
rpsF		30S ribosomal protein S6	6	6	1	2	3863				287	287	287	C4_03657	GR8_00972	HM-7_02033	MTCC-B6033_03876	SH-B11_03952	TUAT1_03837
ytrI		Sporulation membrane protein YtrI	6	6	1	2	5166				503	503	503	C4_02508	GR8_03606	HM-7_00892	MTCC-B6033_02701	SH-B11_02777	TUAT1_02695
ugtP		Processive diacylglycerol beta-glucosyltransferase	6	6	1	2	3038				1151	1151	1151	C4_01866	GR8_02963	HM-7_00240	MTCC-B6033_02051	SH-B11_02059	TUAT1_01990
dapB		4-hydroxy-tetrahydrodipicolinate reductase	6	6	1	2	3094				803	803	803	C4_01918	GR8_03016	HM-7_00292	MTCC-B6033_02103	SH-B11_02113	TUAT1_02045
aprN		Subtilisin NAT	6	6	1	2	3201				1130	1130	1130	C4_02024	GR8_03121	HM-7_00398	MTCC-B6033_02208	SH-B11_02218	TUAT1_02151
mcpA_4		Methyl-accepting chemotaxis protein McpA	6	6	1	2	4916				1988	1988	1988	C4_02746	GR8_00062	HM-7_01138	MTCC-B6033_02953	SH-B11_03030	TUAT1_02940
hemAT		Heme-based aerotactic transducer HemAT	6	6	1	2	1663				1295	1295	1295	C4_00912	GR8_02005	HM-7_03224	MTCC-B6033_01029	SH-B11_01064	TUAT1_01044
ykuD_1		Putative L,D-transpeptidase YkuD	6	6	1	2	2154				497	497	497	C4_01246	GR8_02334	HM-7_03559	MTCC-B6033_01424	SH-B11_01443	TUAT1_01374
murB		UDP-N-acetylenolpyruvoylglucosamine reductase	6	6	1	2	2280				911	911	911	C4_01364	GR8_02453	HM-7_03677	MTCC-B6033_01544	SH-B11_01561	TUAT1_01491
paiB		Protease synthase and sporulation protein PAI 2	6	6	1	2	1199				605	611	610	C4_00502	GR8_01596	HM-7_02812	MTCC-B6033_00610	SH-B11_00623	TUAT1_00627
alsE		D-allulose-6-phosphate 3-epimerase	6	6	1	2	2635				692	692	692	C4_01691	GR8_02785	HM-7_04008	MTCC-B6033_01872	SH-B11_01883	TUAT1_01817
rlmN		putative dual-specificity RNA methyltransferase RlmN	6	6	1	2	2338				1088	1088	1088	C4_01421	GR8_02510	HM-7_03734	MTCC-B6033_01601	SH-B11_01618	TUAT1_01548
group_3592		hypothetical protein	6	6	1	2	5325				1007	1007	1007	C4_02415	GR8_03509	HM-7_00798	MTCC-B6033_02601	SH-B11_02676	TUAT1_02546
ddc_1		L-2,4-diaminobutyrate decarboxylase	6	6	1	2	1376				1658	1658	1658	C4_00645	GR8_01734	HM-7_02956	MTCC-B6033_00758	SH-B11_00796	TUAT1_00776
xerD		Tyrosine recombinase XerD	6	6	1	2	3197				890	890	890	C4_02020	GR8_03117	HM-7_00394	MTCC-B6033_02204	SH-B11_02214	TUAT1_02147
ydcC		Sporulation protein YdcC	6	6	1	2	1082				1007	1007	1007	C4_00409	GR8_01508	HM-7_02573	MTCC-B6033_00507	SH-B11_00520	TUAT1_00534
defB		Peptide deformylase 2	6	6	1	2	2207				557	557	557	C4_01296	GR8_02385	HM-7_03609	MTCC-B6033_01476	SH-B11_01493	TUAT1_01424
yabQ		Spore protein YabQ	6	6	1	2	3783				638	638	638	C4_03738	GR8_01062	HM-7_02124	MTCC-B6033_00075	SH-B11_00076	TUAT1_00074
ecfT_1		Energy-coupling factor transporter transmembrane protein EcfT	6	6	1	2	3698				797	797	797	C4_00064	GR8_01164	HM-7_02226	MTCC-B6033_00177	SH-B11_00178	TUAT1_00176
cmpC		Bicarbonate transport ATP-binding protein CmpC	6	6	1	2	5019				770	770	770	C4_02642	GR8_03739	HM-7_01024	MTCC-B6033_02835	SH-B11_02912	TUAT1_02826
glsA1		Glutaminase 1	6	6	1	2	857				980	980	980	C4_00209	GR8_01301	HM-7_02367	MTCC-B6033_00313	SH-B11_00311	TUAT1_00325
group_3601		Arylesterase	6	6	1	2	3440				728	728	728	C4_02242	GR8_03339	HM-7_00617	MTCC-B6033_02427	SH-B11_02440	TUAT1_02369
ctaC		Cytochrome c oxidase subunit 2	6	6	1	2	2244				1067	1067	1067	C4_01328	GR8_02417	HM-7_03641	MTCC-B6033_01508	SH-B11_01525	TUAT1_01456
srlE		PTS system glucitol/sorbitol-specific EIIB component	6	6	1	2	2295				1010	1010	1010	C4_01379	GR8_02468	HM-7_03692	MTCC-B6033_01559	SH-B11_01576	TUAT1_01506
gpsA		Glycerol-3-phosphate dehydrogenase [NAD(P)+]	6	6	1	2	3128				1037	1037	1037	C4_01952	GR8_03050	HM-7_00326	MTCC-B6033_02137	SH-B11_02147	TUAT1_02079
est		Carboxylesterase	6	6	1	2	4646				746	746	746	C4_02980	GR8_00297	HM-7_01373	MTCC-B6033_03190	SH-B11_03255	TUAT1_03179
group_3606		hypothetical protein	6	6	1	2	4819				329	329	329	C4_02836	GR8_00152	HM-7_01228	MTCC-B6033_03045	SH-B11_03123	TUAT1_03032
yecD_2		Isochorismatase family protein YecD	6	6	1	2	4854				551	551	551	C4_02802	GR8_00118	HM-7_01194	MTCC-B6033_03011	SH-B11_03087	TUAT1_02996
ispD		2-C-methyl-D-erythritol 4-phosphate cytidylyltransferase	6	6	1	2	3754				689	689	689	C4_00008	GR8_01108	HM-7_02170	MTCC-B6033_00121	SH-B11_00122	TUAT1_00120
ydbD_1		putative manganese catalase	6	6	1	2	2158				896	896	896	C4_01250	GR8_02338	HM-7_03563	MTCC-B6033_01428	SH-B11_01447	TUAT1_01378
group_361		hypothetical protein	6	6	1	2	1204				467	467	467	C4_00506	GR8_01600	HM-7_02816	MTCC-B6033_00614	SH-B11_00627	TUAT1_00631
resE_3		Sensor histidine kinase ResE	6	6	1	2	4693				1754	1754	1754	C4_02938	GR8_00255	HM-7_01331	MTCC-B6033_03149	SH-B11_03214	TUAT1_03137
acoA_2		Acetoin:2,6-dichlorophenolindophenol oxidoreductase subunit alpha	6	6	1	2	1970				983	983	983	C4_01122	GR8_02211	HM-7_03436	MTCC-B6033_01299	SH-B11_01269	TUAT1_01249
yvoA_1		HTH-type transcriptional repressor YvoA	6	6	1	2	2451				725	725	725	C4_01532	GR8_02621	HM-7_03845	MTCC-B6033_01713	SH-B11_01729	TUAT1_01659
yhdG_2		putative amino acid permease YhdG	6	6	1	2	994				1388	1388	1388	C4_00335	GR8_01429	HM-7_02499	MTCC-B6033_00433	SH-B11_00437	TUAT1_00458
group_3614		hypothetical protein	6	6	1	2	2541				443	443	443	C4_01606	GR8_02701	HM-7_03921	MTCC-B6033_01789	SH-B11_01801	TUAT1_01736
cfiB		2-oxoglutarate carboxylase small subunit	6	6	1	2	2240				3446	3446	3446	C4_01324	GR8_02413	HM-7_03637	MTCC-B6033_01504	SH-B11_01521	TUAT1_01452
murAB		UDP-N-acetylglucosamine 1-carboxyvinyltransferase 2	6	6	1	2	4310				1289	1289	1289	C4_03282	GR8_00605	HM-7_01677	MTCC-B6033_03490	SH-B11_03557	TUAT1_03477
putC		1-pyrroline-5-carboxylate dehydrogenase 2	6	6	1	2	931				1547	1547	1547	C4_00276	GR8_01368	HM-7_02437	MTCC-B6033_00377	SH-B11_00378	TUAT1_00393
licT_1		Transcription antiterminator LicT	6	6	1	2	816				836	836	836	C4_00174	GR8_01266	HM-7_02332	MTCC-B6033_00275	SH-B11_00276	TUAT1_00290
rsbS		RsbT antagonist protein RsbS	6	6	1	2	1088				368	368	368	C4_00414	GR8_01513	HM-7_02578	MTCC-B6033_00512	SH-B11_00525	TUAT1_00539
group_3620		hypothetical protein	6	6	1	2	1463				548	548	548	C4_00712	GR8_01802	HM-7_03023	MTCC-B6033_00832	SH-B11_00862	TUAT1_00840
group_3621		hypothetical protein	6	6	1	2	4189				332	332	332	C4_03371	GR8_00696	HM-7_01758	MTCC-B6033_03580	SH-B11_03656	TUAT1_03566
tilS		tRNA(Ile)-lysidine synthase	6	6	1	2	3777				1403	1403	1403	C4_03746	GR8_01070	HM-7_02132	MTCC-B6033_00083	SH-B11_00084	TUAT1_00082
frdA		Fumarate reductase flavoprotein subunit	6	6	1	2	5231				1760	1760	1760	C4_02447	GR8_03545	HM-7_00831	MTCC-B6033_02639	SH-B11_02713	TUAT1_02634
mrpE		Na(+)/H(+) antiporter subunit E	6	6	1	2	4867				479	479	479	C4_02790	GR8_00106	HM-7_01182	MTCC-B6033_02999	SH-B11_03075	TUAT1_02984
moeZ		putative adenylyltransferase/sulfurtransferase MoeZ	6	6	1	2	3307				386	386	386	C4_02124	GR8_03221	HM-7_00499	MTCC-B6033_02309	SH-B11_02321	TUAT1_02251
feuC_1		Iron-uptake system permease protein FeuC	6	6	1	2	1712				950	950	950	C4_00923	GR8_02016	HM-7_03236	MTCC-B6033_01098	SH-B11_01075	TUAT1_01055
ntdB		Kanosamine-6-phosphate phosphatase	6	6	1	2	895				866	866	866	C4_00247	GR8_01340	HM-7_02406	MTCC-B6033_00351	SH-B11_00349	TUAT1_00364
topA		DNA topoisomerase 1	6	6	1	2	2374				2075	2075	2075	C4_01456	GR8_02545	HM-7_03769	MTCC-B6033_01636	SH-B11_01653	TUAT1_01583
resA_1		Thiol-disulfide oxidoreductase ResA	6	6	1	2	3162				530	530	530	C4_01986	GR8_03083	HM-7_00360	MTCC-B6033_02170	SH-B11_02180	TUAT1_02113
tolB		Protein TolB	6	6	1	2	1207				1049	1049	1049	C4_00509	GR8_01603	HM-7_02819	MTCC-B6033_00617	SH-B11_00630	TUAT1_00634
clpX		ATP-dependent Clp protease ATP-binding subunit ClpX	6	6	1	2	5327				1265	1265	1265	C4_02413	GR8_03507	HM-7_00796	MTCC-B6033_02599	SH-B11_02674	TUAT1_02544
gyrB		DNA gyrase subunit B	6	6	1	2	3841				1922	1922	1922	C4_03679	GR8_00994	HM-7_02055	MTCC-B6033_00006	SH-B11_00006	TUAT1_00006
lacF_1		Lactose transport system permease protein LacF	6	6	1	2	2632				932	932	932	C4_01688	GR8_02782	HM-7_04005	MTCC-B6033_01869	SH-B11_01880	TUAT1_01814
group_3633		hypothetical protein	6	6	1	2	890				1430	1430	1430	C4_00242	GR8_01335	HM-7_02401	MTCC-B6033_00346	SH-B11_00344	TUAT1_00359
yfiZ		putative siderophore transport system permease protein YfiZ	6	6	1	2	4785				1016	1016	1016	C4_02864	GR8_00181	HM-7_01257	MTCC-B6033_03074	SH-B11_03151	TUAT1_03061
puuP		Putrescine importer PuuP	6	6	1	2	2734				1325	1325	1325	C4_01783	GR8_02879	HM-7_04099	MTCC-B6033_01966	SH-B11_01974	TUAT1_01905
dgkA		Undecaprenol kinase	6	6	1	2	3396				386	386	386	C4_02202	GR8_03299	HM-7_00577	MTCC-B6033_02387	SH-B11_02399	TUAT1_02329
sugC		Trehalose import ATP-binding protein SugC	6	6	1	2	1610				1106	1106	1106	C4_00861	GR8_01954	HM-7_03173	MTCC-B6033_00978	SH-B11_01012	TUAT1_00992
nudL		putative Nudix hydrolase NudL	6	6	1	2	3971				623	623	623	C4_03569	GR8_00890	HM-7_01950	MTCC-B6033_03787	SH-B11_03866	TUAT1_03757
ltaS1_2		Lipoteichoic acid synthase 1	6	6	1	2	3344				1919	1919	1919	C4_02153	GR8_03250	HM-7_00528	MTCC-B6033_02338	SH-B11_02350	TUAT1_02280
group_364		hypothetical protein	6	6	1	2	1208				374	374	374	C4_00510	GR8_01604	HM-7_02820	MTCC-B6033_00618	SH-B11_00631	TUAT1_00635
sipT		Signal peptidase I T	6	6	1	2	2193				605	605	605	C4_01282	GR8_02370	HM-7_03595	MTCC-B6033_01461	SH-B11_01479	TUAT1_01410
pstB3		Phosphate import ATP-binding protein PstB 3	6	6	1	2	3357				782	782	782	C4_02163	GR8_03260	HM-7_00538	MTCC-B6033_02348	SH-B11_02360	TUAT1_02290
group_3642		hypothetical protein	6	6	1	2	4192				617	617	617	C4_03368	GR8_00693	HM-7_01755	MTCC-B6033_03577	SH-B11_03653	TUAT1_03563
leuS		Leucine--tRNA ligase	6	6	1	2	5050				2414	2414	2414	C4_02613	GR8_03712	HM-7_00996	MTCC-B6033_02807	SH-B11_02883	TUAT1_02798
cdaS		Cyclic di-AMP synthase CdaS	6	6	1	2	2761				626	626	626	C4_01807	GR8_02904	HM-7_04124	MTCC-B6033_01992	SH-B11_01999	TUAT1_01931
ppaC		Manganese-dependent inorganic pyrophosphatase	6	6	1	2	3875				929	929	929	C4_03645	GR8_00960	HM-7_02021	MTCC-B6033_03864	SH-B11_03940	TUAT1_03825
oppF_4		Oligopeptide transport ATP-binding protein OppF	6	6	1	2	1991				968	968	968	C4_01142	GR8_02232	HM-7_03456	MTCC-B6033_01319	SH-B11_01289	TUAT1_01269
rpoE_1		ECF RNA polymerase sigma factor RpoE	6	6	1	2	1452				566	566	566	C4_00704	GR8_01794	HM-7_03015	MTCC-B6033_00824	SH-B11_00854	TUAT1_00832
ldh_2		Leucine dehydrogenase	6	6	1	2	3267				1094	1094	1094	C4_02084	GR8_03182	HM-7_00459	MTCC-B6033_02270	SH-B11_02282	TUAT1_02212
rocC_1		Amino-acid permease RocC	6	6	1	2	836				1403	1403	1403	C4_00189	GR8_01280	HM-7_02346	MTCC-B6033_00292	SH-B11_00290	TUAT1_00304
guaA		GMP synthase [glutamine-hydrolyzing]	6	6	1	2	1215				1541	1541	1541	C4_00517	GR8_01611	HM-7_02827	MTCC-B6033_00625	SH-B11_00638	TUAT1_00642
emrY		putative multidrug resistance protein EmrY	6	6	1	2	986				1433	1433	1433	C4_00327	GR8_01421	HM-7_02491	MTCC-B6033_00426	SH-B11_00429	TUAT1_00450
dppB_1		Dipeptide transport system permease protein DppB	6	6	1	2	1499				1001	1001	1001	C4_00744	GR8_01834	HM-7_03055	MTCC-B6033_00864	SH-B11_00894	TUAT1_00872
thrS		Threonine--tRNA ligase 1	6	6	1	2	5194				1940	1940	1940	C4_02480	GR8_03578	HM-7_00864	MTCC-B6033_02673	SH-B11_02749	TUAT1_02667
mtlA		PTS system mannitol-specific EIICB component	6	6	1	2	999				1442	1442	1442	C4_00340	GR8_01434	HM-7_02504	MTCC-B6033_00438	SH-B11_00442	TUAT1_00463
exuR		putative HTH-type transcriptional repressor ExuR	6	6	1	2	4695				1010	1010	1010	C4_02936	GR8_00253	HM-7_01329	MTCC-B6033_03147	SH-B11_03212	TUAT1_03135
group_3656		hypothetical protein	6	6	1	2	4904				401	401	401	C4_02758	GR8_00074	HM-7_01150	MTCC-B6033_02965	SH-B11_03042	TUAT1_02952
group_3657		hypothetical protein	6	6	1	2	1206				368	368	368	C4_00508	GR8_01602	HM-7_02818	MTCC-B6033_00616	SH-B11_00629	TUAT1_00633
ftsH		ATP-dependent zinc metalloprotease FtsH	6	6	1	2	3775				1904	1904	1904	C4_03748	GR8_01072	HM-7_02134	MTCC-B6033_00085	SH-B11_00086	TUAT1_00084
dck		Deoxyadenosine/deoxycytidine kinase	6	6	1	2	3830				659	659	659	C4_03691	GR8_01010	HM-7_02072	MTCC-B6033_00022	SH-B11_00024	TUAT1_00022
group_3660		Aminopeptidase 2	6	6	1	2	2196				1232	1232	1232	C4_01285	GR8_02374	HM-7_03598	MTCC-B6033_01465	SH-B11_01482	TUAT1_01413
nrdF		Ribonucleoside-diphosphate reductase subunit beta	6	6	1	2	2500				980	980	980	C4_01578	GR8_02667	HM-7_03890	MTCC-B6033_01759	SH-B11_01777	TUAT1_01705
group_3662		hypothetical protein	6	6	1	2	4316				956	956	956	C4_03276	GR8_00599	HM-7_01671	MTCC-B6033_03484	SH-B11_03551	TUAT1_03471
leuB		3-isopropylmalate dehydrogenase	6	6	1	2	5322				1097	1097	1097	C4_02418	GR8_03512	HM-7_00801	MTCC-B6033_02604	SH-B11_02679	TUAT1_02549
group_3664		putative ABC transporter ATP-binding protein	6	6	1	2	2708				1829	1829	1829	C4_01758	GR8_02854	HM-7_04074	MTCC-B6033_01941	SH-B11_01949	TUAT1_01880
adh2_1		Long-chain-alcohol dehydrogenase 2	6	6	1	2	4899				1172	1172	1172	C4_02761	GR8_00077	HM-7_01153	MTCC-B6033_02970	SH-B11_03045	TUAT1_02955
glnQ_1		Glutamine transport ATP-binding protein GlnQ	6	6	1	2	5415				728	728	728	C4_02329	GR8_03426	HM-7_00712	MTCC-B6033_02518	SH-B11_02590	TUAT1_02463
kamA		L-lysine 2,3-aminomutase	6	6	1	2	2790				1400	1400	1400	C4_01831	GR8_02928	HM-7_04148	MTCC-B6033_02016	SH-B11_02023	TUAT1_01955
rapH		Response regulator aspartate phosphatase H	6	6	1	2	5536				1121	1121	1121	C4_02244	GR8_03341	HM-7_00619	MTCC-B6033_02429	SH-B11_02442	TUAT1_02371
pbpB		Penicillin-binding protein 2B	6	6	1	2	2272				2156	2156	2156	C4_01356	GR8_02445	HM-7_03669	MTCC-B6033_01536	SH-B11_01553	TUAT1_01484
pbuG		Guanine/hypoxanthine permease PbuG	6	6	1	2	1237				1325	1325	1325	C4_00527	GR8_01621	HM-7_02842	MTCC-B6033_00641	SH-B11_00665	TUAT1_00660
prpD		2-methylcitrate dehydratase	6	6	1	2	2737				1436	1436	1436	C4_01786	GR8_02882	HM-7_04102	MTCC-B6033_01969	SH-B11_01977	TUAT1_01908
aroK		Shikimate kinase	6	6	1	2	922				557	557	557	C4_00265	GR8_01360	HM-7_02429	MTCC-B6033_00369	SH-B11_00367	TUAT1_00382
gabD		Succinate-semialdehyde dehydrogenase [NADP(+)]	6	6	1	2	995				1394	1394	1394	C4_00336	GR8_01430	HM-7_02500	MTCC-B6033_00434	SH-B11_00438	TUAT1_00459
mltF		Membrane-bound lytic murein transglycosylase F	6	6	1	2	1823				764	764	764	C4_01027	GR8_02125	HM-7_03340	MTCC-B6033_01202	SH-B11_01179	TUAT1_01159
gntP		High-affinity gluconate transporter	6	6	1	2	3989				1271	1271	1271	C4_03553	GR8_00875	HM-7_01935	MTCC-B6033_03771	SH-B11_03850	TUAT1_03742
bamB		Outer membrane protein assembly factor BamB	6	6	1	2	1350				1757	1757	1757	C4_00622	GR8_01712	HM-7_02934	MTCC-B6033_00737	SH-B11_00774	TUAT1_00755
nadK1		NAD kinase 1	6	6	1	2	5146				803	803	803	C4_02526	GR8_03625	HM-7_00910	MTCC-B6033_02720	SH-B11_02796	TUAT1_02714
accA_2		Acetyl-coenzyme A carboxylase carboxyl transferase subunit alpha	6	6	1	2	5171				977	977	977	C4_02503	GR8_03601	HM-7_00887	MTCC-B6033_02696	SH-B11_02772	TUAT1_02690
group_3678		hypothetical protein	6	6	1	2	3132				602	602	602	C4_01956	GR8_03054	HM-7_00330	MTCC-B6033_02141	SH-B11_02151	TUAT1_02083
group_3679		hypothetical protein	6	6	1	2	3096				872	872	872	C4_01920	GR8_03018	HM-7_00294	MTCC-B6033_02105	SH-B11_02115	TUAT1_02047
group_368		hypothetical protein	6	6	1	2	1240				791	797	796	C4_00530	GR8_01624	HM-7_02845	MTCC-B6033_00644	SH-B11_00668	TUAT1_00663
rbsC_1		Ribose import permease protein RbsC	6	6	1	2	4397				953	953	953	C4_03197	GR8_00520	HM-7_01592	MTCC-B6033_03411	SH-B11_03477	TUAT1_03392
rfbG		CDP-glucose 4,6-dehydratase	6	6	1	2	1321				971	971	971	C4_00595	GR8_01685	HM-7_02907	MTCC-B6033_00706	SH-B11_00746	TUAT1_00728
queE_1		7-carboxy-7-deazaguanine synthase	6	6	1	2	1398				1121	1121	1121	C4_00667	GR8_01756	HM-7_02978	MTCC-B6033_00780	SH-B11_00817	TUAT1_00798
group_3683		hypothetical protein	6	6	1	2	4344				698	698	698	C4_03248	GR8_00571	HM-7_01643	MTCC-B6033_03456	SH-B11_03523	TUAT1_03443
group_3684		hypothetical protein	6	6	1	2	3146				452	452	452	C4_01971	GR8_03068	HM-7_00344	MTCC-B6033_02155	SH-B11_02165	TUAT1_02098
rnjB		Ribonuclease J2	6	6	1	2	2447				1667	1667	1667	C4_01528	GR8_02617	HM-7_03841	MTCC-B6033_01709	SH-B11_01725	TUAT1_01655
cotH		Inner spore coat protein H	6	6	1	2	1737				1094	1094	1094	C4_00948	GR8_02041	HM-7_03261	MTCC-B6033_01123	SH-B11_01100	TUAT1_01080
sucD		Succinate--CoA ligase [ADP-forming] subunit alpha	6	6	1	2	2372				902	902	902	C4_01454	GR8_02543	HM-7_03767	MTCC-B6033_01634	SH-B11_01651	TUAT1_01581
misCA		Membrane protein insertase MisCA	6	6	1	2	3848				776	776	776	C4_03672	GR8_00987	HM-7_02048	MTCC-B6033_03891	SH-B11_03967	TUAT1_03852
group_3689		putative HIT-like protein	6	6	1	2	1640				428	428	428	C4_00889	GR8_01982	HM-7_03201	MTCC-B6033_01006	SH-B11_01040	TUAT1_01020
group_369		hypothetical protein	6	6	1	2	1242				200	200	200	C4_00532	GR8_01626	HM-7_02847	MTCC-B6033_00646	SH-B11_00670	TUAT1_00665
ntaA		Nitrilotriacetate monooxygenase component A	6	6	1	2	974				1325	1325	1325	C4_00315	GR8_01410	HM-7_02479	MTCC-B6033_00414	SH-B11_00417	TUAT1_00438
pstS1		Phosphate-binding protein PstS 1	6	6	1	2	3361				917	917	917	C4_02167	GR8_03264	HM-7_00542	MTCC-B6033_02352	SH-B11_02364	TUAT1_02294
ileS		Isoleucine--tRNA ligase	6	6	1	2	2304				2765	2765	2765	C4_01388	GR8_02477	HM-7_03701	MTCC-B6033_01568	SH-B11_01585	TUAT1_01515
spoIIIAH		Stage III sporulation protein AH	6	6	1	2	3289				632	635	633	C4_02106	GR8_03203	HM-7_00481	MTCC-B6033_02291	SH-B11_02303	TUAT1_02233
accC_2		Biotin carboxylase	6	6	1	2	3287				1349	1349	1349	C4_02104	GR8_03201	HM-7_00479	MTCC-B6033_02289	SH-B11_02301	TUAT1_02231
dcuS_2		Sensor histidine kinase DcuS	6	6	1	2	4881				1601	1601	1601	C4_02778	GR8_00094	HM-7_01170	MTCC-B6033_02987	SH-B11_03062	TUAT1_02972
rsmG		Ribosomal RNA small subunit methyltransferase G	6	6	1	2	3852				719	719	719	C4_03668	GR8_00983	HM-7_02044	MTCC-B6033_03887	SH-B11_03963	TUAT1_03848
cwlS		D-gamma-glutamyl-meso-diaminopimelic acid endopeptidase CwlS	6	6	1	2	2760				1325	1331	1330	C4_01806	GR8_02903	HM-7_04123	MTCC-B6033_01991	SH-B11_01998	TUAT1_01930
group_3698		hypothetical protein	6	6	1	2	2393				428	428	428	C4_01475	GR8_02564	HM-7_03788	MTCC-B6033_01655	SH-B11_01672	TUAT1_01602
priA_1		Primosomal protein N'	6	6	1	2	2334				2408	2408	2408	C4_01417	GR8_02506	HM-7_03730	MTCC-B6033_01597	SH-B11_01614	TUAT1_01544
purS		Phosphoribosylformylglycinamidine synthase subunit PurS	6	6	1	2	1247				254	254	254	C4_00537	GR8_01631	HM-7_02852	MTCC-B6033_00651	SH-B11_00675	TUAT1_00670
mhqA		Putative ring-cleaving dioxygenase MhqA	6	6	1	2	1979				950	950	950	C4_01131	GR8_02220	HM-7_03445	MTCC-B6033_01308	SH-B11_01278	TUAT1_01258
resE_2		Sensor histidine kinase ResE	6	6	1	2	3158				1781	1781	1781	C4_01982	GR8_03079	HM-7_00356	MTCC-B6033_02166	SH-B11_02176	TUAT1_02109
group_3702		hypothetical protein	6	6	1	2	5175				1118	1118	1118	C4_02499	GR8_03597	HM-7_00883	MTCC-B6033_02692	SH-B11_02768	TUAT1_02686
ftsA		Cell division protein FtsA	6	6	1	2	2285				1322	1322	1322	C4_01369	GR8_02458	HM-7_03682	MTCC-B6033_01549	SH-B11_01566	TUAT1_01496
yhdL		putative anti-sigma-M factor YhdL	6	6	1	2	1585				1058	1058	1058	C4_00839	GR8_01931	HM-7_03151	MTCC-B6033_00958	SH-B11_00991	TUAT1_00971
group_3705		8-amino-7-oxononanoate synthase/2-amino-3-ketobutyrate coenzyme A ligase	6	6	1	2	2471				1181	1181	1181	C4_01551	GR8_02640	HM-7_03864	MTCC-B6033_01732	SH-B11_01748	TUAT1_01678
group_3706		hypothetical protein	6	6	1	2	5229				443	443	443	C4_02449	GR8_03547	HM-7_00833	MTCC-B6033_02641	SH-B11_02715	TUAT1_02636
prfA		Peptide chain release factor 1	6	6	1	2	4318				1067	1067	1067	C4_03274	GR8_00597	HM-7_01669	MTCC-B6033_03482	SH-B11_03549	TUAT1_03469
recF		DNA replication and repair protein RecF	6	6	1	2	3843				1112	1112	1112	C4_03677	GR8_00992	HM-7_02053	MTCC-B6033_00004	SH-B11_00004	TUAT1_00004
pbpD		Penicillin-binding protein 4	6	6	1	2	4884				1868	1868	1868	C4_02775	GR8_00091	HM-7_01167	MTCC-B6033_02984	SH-B11_03059	TUAT1_02969
yodP		N-acetyltransferase YodP	6	6	1	2	1256				845	845	845	C4_00546	GR8_01640	HM-7_02861	MTCC-B6033_00660	SH-B11_00684	TUAT1_00680
gabP_1		GABA permease	6	6	1	2	1210				1388	1388	1388	C4_00512	GR8_01606	HM-7_02822	MTCC-B6033_00620	SH-B11_00633	TUAT1_00637
gbsB		Alcohol dehydrogenase	6	6	1	2	4980				1208	1208	1208	C4_02694	GR8_00010	HM-7_01086	MTCC-B6033_02897	SH-B11_02976	TUAT1_02888
group_3712		hypothetical protein	6	6	1	2	5097				416	416	416	C4_02569	GR8_03668	HM-7_00952	MTCC-B6033_02763	SH-B11_02839	TUAT1_02754
gltX		Glutamate--tRNA ligase	6	6	1	2	3752				1451	1451	1451	C4_00010	GR8_01110	HM-7_02172	MTCC-B6033_00123	SH-B11_00124	TUAT1_00122
group_3714		hypothetical protein	6	6	1	2	4798				851	851	851	C4_02855	GR8_00172	HM-7_01248	MTCC-B6033_03065	SH-B11_03143	TUAT1_03052
kinA_3		Sporulation kinase A	6	6	1	2	4889				1292	1292	1292	C4_02770	GR8_00086	HM-7_01162	MTCC-B6033_02979	SH-B11_03054	TUAT1_02964
oxdC		Oxalate decarboxylase OxdC	6	6	1	2	1481				1163	1163	1163	C4_00729	GR8_01819	HM-7_03040	MTCC-B6033_00849	SH-B11_00879	TUAT1_00857
cotY		Spore coat protein Y	6	6	1	2	1843				491	491	491	C4_01045	GR8_02143	HM-7_03358	MTCC-B6033_01220	SH-B11_01197	TUAT1_01177
ybiT_2		putative ABC transporter ATP-binding protein YbiT	6	6	1	2	2195				1619	1619	1619	C4_01284	GR8_02372	HM-7_03597	MTCC-B6033_01463	SH-B11_01481	TUAT1_01412
kstR2_1		HTH-type transcriptional repressor KstR2	6	6	1	2	763				632	632	632	C4_00137	GR8_01232	HM-7_02296	MTCC-B6033_00238	SH-B11_00236	TUAT1_00254
pucR_1		Purine catabolism regulatory protein	6	6	1	2	1257				1523	1658	1635	C4_00547	GR8_01641	HM-7_02862	MTCC-B6033_00661	SH-B11_00685	TUAT1_00681
ydaD_2		General stress protein 39	6	6	1	2	1665				860	860	860	C4_00914	GR8_02007	HM-7_03226	MTCC-B6033_01031	SH-B11_01066	TUAT1_01046
yodJ_2		Putative carboxypeptidase YodJ	6	6	1	2	2782				830	830	830	C4_01823	GR8_02920	HM-7_04140	MTCC-B6033_02008	SH-B11_02015	TUAT1_01947
metN		Methionine import ATP-binding protein MetN	6	6	1	2	4750				1025	1025	1025	C4_02885	GR8_00204	HM-7_01279	MTCC-B6033_03097	SH-B11_03171	TUAT1_03086
glcK		Glucokinase	6	6	1	2	3345				953	953	953	C4_02154	GR8_03251	HM-7_00529	MTCC-B6033_02339	SH-B11_02351	TUAT1_02281
kinA_2		Sporulation kinase A	6	6	1	2	2200				1289	1289	1289	C4_01289	GR8_02378	HM-7_03602	MTCC-B6033_01469	SH-B11_01486	TUAT1_01417
ydaM		putative diguanylate cyclase YdaM	6	6	1	2	4658				1598	1598	1598	C4_02972	GR8_00289	HM-7_01365	MTCC-B6033_03183	SH-B11_03248	TUAT1_03171
mtaB		Threonylcarbamoyladenosine tRNA methylthiotransferase MtaB	6	6	1	2	3410				1361	1361	1361	C4_02214	GR8_03311	HM-7_00589	MTCC-B6033_02399	SH-B11_02412	TUAT1_02341
yutF		Acid sugar phosphatase	6	6	1	2	4810				770	770	770	C4_02845	GR8_00161	HM-7_01237	MTCC-B6033_03054	SH-B11_03132	TUAT1_03041
plsC		1-acyl-sn-glycerol-3-phosphate acyltransferase	6	6	1	2	1587				602	602	602	C4_00841	GR8_01933	HM-7_03153	MTCC-B6033_00960	SH-B11_00993	TUAT1_00973
group_3729		hypothetical protein	6	6	1	2	3779				734	734	734	C4_03744	GR8_01068	HM-7_02130	MTCC-B6033_00081	SH-B11_00082	TUAT1_00080
atoD		Acetate CoA-transferase subunit alpha	6	6	1	2	1259				686	686	686	C4_00549	GR8_01643	HM-7_02864	MTCC-B6033_00663	SH-B11_00687	TUAT1_00683
ilvC		Ketol-acid reductoisomerase (NADP(+))	6	6	1	2	5320				1028	1028	1028	C4_02420	GR8_03514	HM-7_00803	MTCC-B6033_02606	SH-B11_02681	TUAT1_02551
ydjZ_2		TVP38/TMEM64 family inner membrane protein YdjZ	6	6	1	2	5192				638	638	638	C4_02482	GR8_03580	HM-7_00866	MTCC-B6033_02675	SH-B11_02751	TUAT1_02669
group_3732		hypothetical protein	6	6	1	2	3302				956	956	956	C4_02119	GR8_03216	HM-7_00494	MTCC-B6033_02304	SH-B11_02316	TUAT1_02246
pyk		Pyruvate kinase	6	6	1	2	5173				1760	1760	1760	C4_02501	GR8_03599	HM-7_00885	MTCC-B6033_02694	SH-B11_02770	TUAT1_02688
dppA_1		Periplasmic dipeptide transport protein	6	6	1	2	1498				1586	1586	1586	C4_00743	GR8_01833	HM-7_03054	MTCC-B6033_00863	SH-B11_00893	TUAT1_00871
mglA		Galactose/methyl galactoside import ATP-binding protein MglA	6	6	1	2	4878				1535	1535	1535	C4_02781	GR8_00097	HM-7_01173	MTCC-B6033_02990	SH-B11_03065	TUAT1_02975
group_3736		hypothetical protein	6	6	1	2	4832				476	476	476	C4_02823	GR8_00139	HM-7_01215	MTCC-B6033_03032	SH-B11_03108	TUAT1_03017
hpr		HTH-type transcriptional regulator Hpr	6	6	1	2	1635				614	614	614	C4_00884	GR8_01977	HM-7_03196	MTCC-B6033_01001	SH-B11_01035	TUAT1_01015
group_3738		hypothetical protein	6	6	1	2	4754				368	368	368	C4_02882	GR8_00201	HM-7_01276	MTCC-B6033_03094	SH-B11_03168	TUAT1_03083
hemY		Protoporphyrinogen oxidase	6	6	1	2	1650				1412	1412	1412	C4_00899	GR8_01992	HM-7_03211	MTCC-B6033_01016	SH-B11_01050	TUAT1_01031
group_374		hypothetical protein	6	6	1	2	1267				230	230	230	C4_00557	GR8_01651	HM-7_02872	MTCC-B6033_00671	SH-B11_00695	TUAT1_00691
ohrA		Organic hydroperoxide resistance protein OhrA	6	6	1	2	2007				428	428	428	C4_01157	GR8_02247	HM-7_03471	MTCC-B6033_01335	SH-B11_01305	TUAT1_01284
group_3741		hypothetical protein	6	6	1	2	1451				326	326	326	C4_00703	GR8_01793	HM-7_03014	MTCC-B6033_00823	SH-B11_00853	TUAT1_00831
lplJ		Lipoate-protein ligase LplJ	6	6	1	2	1657				989	989	989	C4_00906	GR8_01999	HM-7_03218	MTCC-B6033_01023	SH-B11_01058	TUAT1_01038
cssR		Transcriptional regulatory protein CssR	6	6	1	2	4731				674	674	674	C4_02903	GR8_00222	HM-7_01297	MTCC-B6033_03115	SH-B11_03189	TUAT1_03104
yniC		2-deoxyglucose-6-phosphate phosphatase	6	6	1	2	1561				665	665	665	C4_00815	GR8_01907	HM-7_03127	MTCC-B6033_00934	SH-B11_00968	TUAT1_00947
ywnA_2		Putative HTH-type transcriptional regulator YwnA	6	6	1	2	4537				428	428	428	C4_03073	GR8_00396	HM-7_01467	MTCC-B6033_03283	SH-B11_03349	TUAT1_03268
ydiN_1		Inner membrane transport protein YdiN	6	6	1	2	3964				1181	1181	1181	C4_03574	GR8_00895	HM-7_01955	MTCC-B6033_03793	SH-B11_03871	TUAT1_03762
aroF		Phospho-2-dehydro-3-deoxyheptonate aldolase	6	6	1	2	5100				1085	1085	1085	C4_02566	GR8_03665	HM-7_00949	MTCC-B6033_02760	SH-B11_02836	TUAT1_02751
group_3748		hypothetical protein	6	6	1	2	1066				767	767	767	C4_00396	GR8_01495	HM-7_02560	MTCC-B6033_00494	SH-B11_00507	TUAT1_00521
mrpG		Na(+)/H(+) antiporter subunit G	6	6	1	2	4865				374	374	374	C4_02792	GR8_00108	HM-7_01184	MTCC-B6033_03001	SH-B11_03077	TUAT1_02986
tpiA		Triosephosphate isomerase	6	6	1	2	4620				761	761	761	C4_03002	GR8_00319	HM-7_01395	MTCC-B6033_03212	SH-B11_03277	TUAT1_03201
group_3751		hypothetical protein	6	6	1	2	2141				461	461	461	C4_01240	GR8_02330	HM-7_03553	MTCC-B6033_01418	SH-B11_01388	TUAT1_01368
yckB		putative ABC transporter extracellular-binding protein YckB	6	6	1	2	935				872	872	872	C4_00280	GR8_01372	HM-7_02441	MTCC-B6033_00381	SH-B11_00382	TUAT1_00397
tasA		Spore coat-associated protein N	6	6	1	2	3315				800	800	800	C4_02132	GR8_03229	HM-7_00507	MTCC-B6033_02317	SH-B11_02329	TUAT1_02259
dctP		C4-dicarboxylate-binding periplasmic protein DctP	6	6	1	2	1059				1097	1097	1097	C4_00389	GR8_01488	HM-7_02553	MTCC-B6033_00487	SH-B11_00500	TUAT1_00514
trpS		Tryptophan--tRNA ligase	6	6	1	2	1806				995	995	995	C4_01010	GR8_02108	HM-7_03323	MTCC-B6033_01185	SH-B11_01162	TUAT1_01142
group_3756		hypothetical protein	6	6	1	2	5337				791	791	791	C4_02402	GR8_03499	HM-7_00785	MTCC-B6033_02591	SH-B11_02663	TUAT1_02536
sepF		Cell division protein SepF	6	6	1	2	2301				458	458	458	C4_01385	GR8_02474	HM-7_03698	MTCC-B6033_01565	SH-B11_01582	TUAT1_01512
group_3758		hypothetical protein	6	6	1	2	3148				641	641	641	C4_01973	GR8_03070	HM-7_00346	MTCC-B6033_02157	SH-B11_02167	TUAT1_02100
yidA		Sugar phosphatase YidA	6	6	1	2	4023				812	812	812	C4_03524	GR8_00846	HM-7_01906	MTCC-B6033_03732	SH-B11_03815	TUAT1_03713
cmpR_2		HTH-type transcriptional activator CmpR	6	6	1	2	1314				908	908	908	C4_00590	GR8_01680	HM-7_02903	MTCC-B6033_00701	SH-B11_00741	TUAT1_00722
nadA		Quinolinate synthase A	6	6	1	2	5367				1109	1109	1109	C4_02372	GR8_03469	HM-7_00755	MTCC-B6033_02561	SH-B11_02633	TUAT1_02506
atpE_1		V-type proton ATPase subunit E	6	6	1	2	2385				764	764	764	C4_01467	GR8_02556	HM-7_03780	MTCC-B6033_01647	SH-B11_01664	TUAT1_01594
dinB_2		DNA polymerase IV	6	6	1	2	3247				1256	1256	1256	C4_02064	GR8_03162	HM-7_00439	MTCC-B6033_02250	SH-B11_02262	TUAT1_02192
group_3763		hypothetical protein	6	6	1	2	2232				323	323	323	C4_01316	GR8_02405	HM-7_03629	MTCC-B6033_01496	SH-B11_01513	TUAT1_01444
bepA_1		Beta-barrel assembly-enhancing protease	6	6	1	2	3104				1271	1271	1271	C4_01928	GR8_03026	HM-7_00302	MTCC-B6033_02113	SH-B11_02123	TUAT1_02055
yvyI		Putative mannose-6-phosphate isomerase YvyI	6	6	1	2	4430				950	950	950	C4_03165	GR8_00488	HM-7_01560	MTCC-B6033_03379	SH-B11_03445	TUAT1_03360
gfo_1		Glucose--fructose oxidoreductase	6	6	1	2	4918				989	989	989	C4_02744	GR8_00060	HM-7_01136	MTCC-B6033_02951	SH-B11_03028	TUAT1_02938
yxeB		Iron(3+)-hydroxamate-binding protein YxeB	6	6	1	2	1449				926	926	926	C4_00701	GR8_01791	HM-7_03012	MTCC-B6033_00821	SH-B11_00851	TUAT1_00829
group_3768		putative sugar-binding periplasmic protein	6	6	1	2	4427				1265	1265	1265	C4_03168	GR8_00491	HM-7_01563	MTCC-B6033_03382	SH-B11_03448	TUAT1_03363
group_3769		DegV domain-containing protein	6	6	1	2	3018				842	842	842	C4_01848	GR8_02945	HM-7_00222	MTCC-B6033_02033	SH-B11_02040	TUAT1_01972
group_377		hypothetical protein	6	6	1	2	1315				1199	1199	1199	C4_00591	GR8_01681	HM-7_02904	MTCC-B6033_00702	SH-B11_00742	TUAT1_00723
nrdE1		Ribonucleoside-diphosphate reductase subunit alpha 1	6	6	1	2	2499				2102	2102	2102	C4_01577	GR8_02666	HM-7_03889	MTCC-B6033_01758	SH-B11_01776	TUAT1_01704
ytrA_2		HTH-type transcriptional repressor YtrA	6	6	1	2	5040				392	392	392	C4_02622	GR8_03720	HM-7_01004	MTCC-B6033_02815	SH-B11_02892	TUAT1_02806
ackA		Acetate kinase	6	6	1	2	5153				1184	1184	1184	C4_02519	GR8_03618	HM-7_00903	MTCC-B6033_02713	SH-B11_02789	TUAT1_02707
gltT_3		Proton/sodium-glutamate symport protein	6	6	1	2	4665				1277	1277	1277	C4_02966	GR8_00283	HM-7_01359	MTCC-B6033_03177	SH-B11_03242	TUAT1_03165
salL		Adenosyl-chloride synthase	6	6	1	2	3913				860	860	860	C4_03610	GR8_00926	HM-7_01986	MTCC-B6033_03829	SH-B11_03901	TUAT1_03791
tdk		Thymidine kinase	6	6	1	2	4314				602	602	602	C4_03278	GR8_00601	HM-7_01673	MTCC-B6033_03486	SH-B11_03553	TUAT1_03473
dxr		1-deoxy-D-xylulose 5-phosphate reductoisomerase	6	6	1	2	2418				1151	1151	1151	C4_01500	GR8_02589	HM-7_03813	MTCC-B6033_01680	SH-B11_01697	TUAT1_01627
rex		Redox-sensing transcriptional repressor Rex	6	6	1	2	1187				653	653	653	C4_00493	GR8_01587	HM-7_02658	MTCC-B6033_00600	SH-B11_00613	TUAT1_00618
arcD		Arginine/ornithine antiporter	6	6	1	2	4687				1409	1409	1409	C4_02944	GR8_00261	HM-7_01337	MTCC-B6033_03155	SH-B11_03220	TUAT1_03143
group_3779		hypothetical protein	6	6	1	2	3366				752	752	752	C4_02172	GR8_03269	HM-7_00547	MTCC-B6033_02357	SH-B11_02369	TUAT1_02299
group_378		hypothetical protein	6	6	1	2	1324				929	929	929	C4_00598	GR8_01688	HM-7_02910	MTCC-B6033_00709	SH-B11_00749	TUAT1_00731
sbcD		Nuclease SbcCD subunit D	6	6	1	2	1727				1175	1175	1175	C4_00938	GR8_02031	HM-7_03251	MTCC-B6033_01113	SH-B11_01090	TUAT1_01070
treP		PTS system trehalose-specific EIIBC component	6	6	1	2	1379				1433	1433	1433	C4_00648	GR8_01737	HM-7_02959	MTCC-B6033_00761	SH-B11_00799	TUAT1_00779
cheW_1		Chemotaxis protein CheW	6	6	1	2	2407				461	461	461	C4_01489	GR8_02578	HM-7_03802	MTCC-B6033_01669	SH-B11_01686	TUAT1_01616
feuB_1		Iron-uptake system permease protein FeuB	6	6	1	2	1711				950	950	950	C4_00922	GR8_02015	HM-7_03235	MTCC-B6033_01097	SH-B11_01074	TUAT1_01054
lytH		L-Ala--D-Glu endopeptidase	6	6	1	2	4805				980	980	980	C4_02850	GR8_00166	HM-7_01242	MTCC-B6033_03059	SH-B11_03137	TUAT1_03046
mnmE		tRNA modification GTPase MnmE	6	6	1	2	3850				1379	1379	1379	C4_03670	GR8_00985	HM-7_02046	MTCC-B6033_03889	SH-B11_03965	TUAT1_03850
glmS		Glutamine--fructose-6-phosphate aminotransferase [isomerizing]	6	6	1	2	722				1802	1802	1802	C4_00110	GR8_01202	HM-7_02265	MTCC-B6033_00215	SH-B11_00216	TUAT1_00220
tuaA		Putative undecaprenyl-phosphate N-acetylgalactosaminyl 1-phosphate transferase	6	6	1	2	4462				659	659	659	C4_03147	GR8_00470	HM-7_01541	MTCC-B6033_03357	SH-B11_03423	TUAT1_03342
fabI		Enoyl-[acyl-carrier-protein] reductase [NADH] FabI	6	6	1	2	1840				776	776	776	C4_01042	GR8_02140	HM-7_03355	MTCC-B6033_01217	SH-B11_01194	TUAT1_01174
yodB_2		HTH-type transcriptional regulator YodB	6	6	1	2	4640				320	320	320	C4_02986	GR8_00303	HM-7_01379	MTCC-B6033_03196	SH-B11_03261	TUAT1_03185
group_379		hypothetical protein	6	6	1	2	1357				1631	1640	1635	C4_00629	GR8_01720	HM-7_02941	MTCC-B6033_00744	SH-B11_00781	TUAT1_00762
bepA_2		Beta-barrel assembly-enhancing protease	6	6	1	2	4549				1460	1460	1460	C4_03061	GR8_00383	HM-7_01455	MTCC-B6033_03272	SH-B11_03338	TUAT1_03256
artP		Arginine-binding extracellular protein ArtP	6	6	1	2	3258				764	764	764	C4_02075	GR8_03173	HM-7_00450	MTCC-B6033_02261	SH-B11_02273	TUAT1_02203
pdtaR		putative transcriptional regulatory protein pdtaR	6	6	1	2	4668				932	935	933	C4_02963	GR8_00280	HM-7_01356	MTCC-B6033_03174	SH-B11_03239	TUAT1_03162
pta_2		Phosphate acetyltransferase	6	6	1	2	4224				971	971	971	C4_03336	GR8_00669	HM-7_01731	MTCC-B6033_03553	SH-B11_03628	TUAT1_03539
rny		Ribonuclease Y	6	6	1	2	2466				1562	1562	1562	C4_01546	GR8_02635	HM-7_03859	MTCC-B6033_01727	SH-B11_01743	TUAT1_01673
group_3795		putative oxidoreductase	6	6	1	2	3067				1127	1127	1127	C4_01893	GR8_02991	HM-7_00267	MTCC-B6033_02078	SH-B11_02088	TUAT1_02020
folK		2-amino-4-hydroxy-6-hydroxymethyldihydropteridine pyrophosphokinase	6	6	1	2	3765				503	503	503	C4_03758	GR8_01082	HM-7_02144	MTCC-B6033_00095	SH-B11_00096	TUAT1_00094
group_3797		hypothetical protein	6	6	1	2	1212				962	962	962	C4_00514	GR8_01608	HM-7_02824	MTCC-B6033_00622	SH-B11_00635	TUAT1_00639
yhfK		putative sugar epimerase YhfK	6	6	1	2	2745				647	647	647	C4_01793	GR8_02890	HM-7_04110	MTCC-B6033_01976	SH-B11_01984	TUAT1_01916
mntH_1		Divalent metal cation transporter MntH	6	6	1	2	1018				1217	1217	1217	C4_00354	GR8_01448	HM-7_02518	MTCC-B6033_00452	SH-B11_00462	TUAT1_00477
yumC_1		Ferredoxin--NADP reductase 2	6	6	1	2	1447				1040	1040	1040	C4_00699	GR8_01789	HM-7_03010	MTCC-B6033_00819	SH-B11_00849	TUAT1_00827
artQ_1		Arginine transport system permease protein ArtQ	6	6	1	2	3257				653	656	655	C4_02074	GR8_03172	HM-7_00449	MTCC-B6033_02260	SH-B11_02272	TUAT1_02202
group_3802		hypothetical protein	6	6	1	2	1346				656	656	656	C4_00618	GR8_01708	HM-7_02930	MTCC-B6033_00733	SH-B11_00770	TUAT1_00751
group_3803		hypothetical protein	6	6	1	2	5152				974	974	974	C4_02520	GR8_03619	HM-7_00904	MTCC-B6033_02714	SH-B11_02790	TUAT1_02708
bm3R1_1		HTH-type transcriptional repressor Bm3R1	6	6	1	2	1651				578	578	578	C4_00900	GR8_01993	HM-7_03212	MTCC-B6033_01017	SH-B11_01051	TUAT1_01032
opuAA		Glycine betaine transport ATP-binding protein OpuAA	6	6	1	2	884				1265	1268	1265	C4_00236	GR8_01329	HM-7_02395	MTCC-B6033_00340	SH-B11_00338	TUAT1_00353
srrA_2		Transcriptional regulatory protein SrrA	6	6	1	2	3159				722	722	722	C4_01983	GR8_03080	HM-7_00357	MTCC-B6033_02167	SH-B11_02177	TUAT1_02110
mhqD		Putative hydrolase MhqD	6	6	1	2	3869				608	608	608	C4_03651	GR8_00966	HM-7_02027	MTCC-B6033_03870	SH-B11_03946	TUAT1_03831
pcrA		ATP-dependent DNA helicase PcrA	6	6	1	2	1271				2222	2222	2222	C4_00560	GR8_01654	HM-7_02875	MTCC-B6033_00674	SH-B11_00698	TUAT1_00694
dus_1		putative tRNA-dihydrouridine synthase	6	6	1	2	3763				1001	1001	1001	C4_03760	GR8_01084	HM-7_02146	MTCC-B6033_00097	SH-B11_00098	TUAT1_00096
group_381		hypothetical protein	6	6	1	2	1365				650	650	650	C4_00635	GR8_01726	HM-7_02947	MTCC-B6033_00750	SH-B11_00787	TUAT1_00768
glmU		Bifunctional protein GlmU	6	6	1	2	3794				1370	1370	1370	C4_03727	GR8_01051	HM-7_02113	MTCC-B6033_00063	SH-B11_00065	TUAT1_00063
proS_1		Proline--tRNA ligase	6	6	1	2	801				1433	1433	1433	C4_00161	GR8_01254	HM-7_02320	MTCC-B6033_00262	SH-B11_00264	TUAT1_00278
group_3812		hypothetical protein	6	6	1	2	2538				695	695	695	C4_01603	GR8_02698	HM-7_03918	MTCC-B6033_01786	SH-B11_01798	TUAT1_01733
arlR		Response regulator ArlR	6	6	1	2	2015				686	686	686	C4_01164	GR8_02254	HM-7_03479	MTCC-B6033_01343	SH-B11_01312	TUAT1_01292
srlB		PTS system glucitol/sorbitol-specific EIIA component	6	6	1	2	2296				356	356	356	C4_01380	GR8_02469	HM-7_03693	MTCC-B6033_01560	SH-B11_01577	TUAT1_01507
group_3815		NAD(P)H dehydrogenase (quinone)	6	6	1	2	3870				668	668	668	C4_03650	GR8_00965	HM-7_02026	MTCC-B6033_03869	SH-B11_03945	TUAT1_03830
sacX		Negative regulator of SacY activity	6	6	1	2	4177				1388	1388	1388	C4_03380	GR8_00705	HM-7_01768	MTCC-B6033_03589	SH-B11_03668	TUAT1_03575
tcyB		L-cystine transport system permease protein TcyB	6	6	1	2	967				692	692	692	C4_00309	GR8_01404	HM-7_02474	MTCC-B6033_00408	SH-B11_00411	TUAT1_00432
ftsY		Signal recognition particle receptor FtsY	6	6	1	2	2357				986	986	986	C4_01440	GR8_02529	HM-7_03753	MTCC-B6033_01620	SH-B11_01637	TUAT1_01567
group_3819		hypothetical protein	6	6	1	2	4562				341	341	341	C4_03048	GR8_00370	HM-7_01442	MTCC-B6033_03259	SH-B11_03325	TUAT1_03243
yveL		Putative tyrosine-protein kinase YveL	6	6	1	2	4592				683	683	683	C4_03029	GR8_00346	HM-7_01422	MTCC-B6033_03239	SH-B11_03304	TUAT1_03228
adk		Adenylate kinase	6	6	1	2	3708				653	653	653	C4_00054	GR8_01154	HM-7_02216	MTCC-B6033_00167	SH-B11_00168	TUAT1_00166
ydcP_2		putative protease YdcP	6	6	1	2	5427				929	929	929	C4_02317	GR8_03415	HM-7_00701	MTCC-B6033_02507	SH-B11_02579	TUAT1_02452
glnM		putative glutamine ABC transporter permease protein GlnM	6	6	1	2	5413				653	653	653	C4_02331	GR8_03428	HM-7_00714	MTCC-B6033_02520	SH-B11_02592	TUAT1_02465
kch		hypothetical protein	6	6	1	2	4905				986	986	986	C4_02757	GR8_00073	HM-7_01149	MTCC-B6033_02964	SH-B11_03041	TUAT1_02951
eccC		ESX secretion system protein EccC	6	6	1	2	4842				4475	4475	4475	C4_02814	GR8_00130	HM-7_01206	MTCC-B6033_03023	SH-B11_03099	TUAT1_03008
hslO		33 kDa chaperonin	6	6	1	2	3773				875	875	875	C4_03750	GR8_01074	HM-7_02136	MTCC-B6033_00087	SH-B11_00088	TUAT1_00086
sumT		Uroporphyrinogen-III C-methyltransferase	6	6	1	2	2323				755	755	755	C4_01407	GR8_02496	HM-7_03720	MTCC-B6033_01587	SH-B11_01604	TUAT1_01534
group_3828		hypothetical protein	6	6	1	2	1758				935	935	935	C4_00969	GR8_02062	HM-7_03282	MTCC-B6033_01144	SH-B11_01121	TUAT1_01101
queC		7-cyano-7-deazaguanine synthase	6	6	1	2	2064				656	656	656	C4_01208	GR8_02298	HM-7_03522	MTCC-B6033_01387	SH-B11_01357	TUAT1_01336
group_383		hypothetical protein	6	6	1	2	1378				386	404	389	C4_00647	GR8_01736	HM-7_02958	MTCC-B6033_00760	SH-B11_00798	TUAT1_00778
uvrA		UvrABC system protein A	6	6	1	2	4522				2876	2876	2876	C4_03088	GR8_00411	HM-7_01482	MTCC-B6033_03298	SH-B11_03364	TUAT1_03283
recG		ATP-dependent DNA helicase RecG	6	6	1	2	2349				2048	2048	2048	C4_01432	GR8_02521	HM-7_03745	MTCC-B6033_01612	SH-B11_01629	TUAT1_01559
yhdN_1		General stress protein 69	6	6	1	2	862				929	929	929	C4_00214	GR8_01306	HM-7_02372	MTCC-B6033_00318	SH-B11_00316	TUAT1_00330
aprE		Subtilisin E	6	6	1	2	1661				1151	1151	1151	C4_00910	GR8_02003	HM-7_03222	MTCC-B6033_01027	SH-B11_01062	TUAT1_01042
trpD		Anthranilate phosphoribosyltransferase	6	6	1	2	3112				1022	1022	1022	C4_01936	GR8_03034	HM-7_00310	MTCC-B6033_02121	SH-B11_02131	TUAT1_02063
valS		Valine--tRNA ligase	6	6	1	2	5343				2642	2642	2642	C4_02396	GR8_03493	HM-7_00779	MTCC-B6033_02585	SH-B11_02657	TUAT1_02530
plsX		Phosphate acyltransferase	6	6	1	2	2351				998	998	998	C4_01434	GR8_02523	HM-7_03747	MTCC-B6033_01614	SH-B11_01631	TUAT1_01561
group_3837		putative NTE family protein	6	6	1	2	3304				875	875	875	C4_02121	GR8_03218	HM-7_00496	MTCC-B6033_02306	SH-B11_02318	TUAT1_02248
mecA		Adapter protein MecA 1	6	6	1	2	1816				665	665	665	C4_01020	GR8_02118	HM-7_03333	MTCC-B6033_01195	SH-B11_01172	TUAT1_01152
comA		Transcriptional regulatory protein ComA	6	6	1	2	4863				641	641	641	C4_02794	GR8_00110	HM-7_01186	MTCC-B6033_03003	SH-B11_03079	TUAT1_02988
group_384		hypothetical protein	6	6	1	2	1385				215	224	219	C4_00654	GR8_01743	HM-7_02965	MTCC-B6033_00767	SH-B11_00805	TUAT1_00785
ysdC_2		Putative aminopeptidase YsdC	6	6	1	2	5206				1088	1088	1088	C4_02471	GR8_03569	HM-7_00855	MTCC-B6033_02664	SH-B11_02737	TUAT1_02658
putB		Proline dehydrogenase 2	6	6	1	2	930				917	917	917	C4_00275	GR8_01367	HM-7_02436	MTCC-B6033_00376	SH-B11_00377	TUAT1_00392
mntH_2		Divalent metal cation transporter MntH	6	6	1	2	1056				1277	1277	1277	C4_00386	GR8_01485	HM-7_02550	MTCC-B6033_00484	SH-B11_00497	TUAT1_00511
mntR		Transcriptional regulator MntR	6	6	1	2	3305				434	434	434	C4_02122	GR8_03219	HM-7_00497	MTCC-B6033_02307	SH-B11_02319	TUAT1_02249
rapI		Response regulator aspartate phosphatase I	6	6	1	2	3273				1100	1100	1100	C4_02090	GR8_03188	HM-7_00465	MTCC-B6033_02276	SH-B11_02288	TUAT1_02218
ina		Immune inhibitor A	6	6	1	2	4040				2381	2381	2381	C4_03509	GR8_00831	HM-7_01891	MTCC-B6033_03717	SH-B11_03800	TUAT1_03698
xkdG		Phage-like element PBSX protein XkdG	6	6	1	2	4941				923	923	923	C4_02725	GR8_00041	HM-7_01117	MTCC-B6033_02931	SH-B11_03009	TUAT1_02919
glnQ_3		Glutamine transport ATP-binding protein GlnQ	6	6	1	2	4139				728	728	728	C4_03418	GR8_00740	HM-7_01803	MTCC-B6033_03624	SH-B11_03709	TUAT1_03610
group_3848		hypothetical protein	6	6	1	2	5014				308	308	308	C4_02647	GR8_03744	HM-7_01029	MTCC-B6033_02840	SH-B11_02917	TUAT1_02831
purF		Amidophosphoribosyltransferase	6	6	1	2	1250				1430	1430	1430	C4_00540	GR8_01634	HM-7_02855	MTCC-B6033_00654	SH-B11_00678	TUAT1_00673
alkA		DNA-3-methyladenine glycosylase	6	6	1	2	1406				869	869	869	C4_00673	GR8_01762	HM-7_02984	MTCC-B6033_00786	SH-B11_00823	TUAT1_00804
group_3850		putative signaling protein	6	6	1	2	2029				2423	2423	2423	C4_01177	GR8_02267	HM-7_03491	MTCC-B6033_01356	SH-B11_01326	TUAT1_01305
putR_2		Proline-responsive transcriptional activator PutR	6	6	1	2	4837				1229	1229	1229	C4_02818	GR8_00134	HM-7_01210	MTCC-B6033_03027	SH-B11_03103	TUAT1_03012
trmD		tRNA (guanine-N(1)-)-methyltransferase	6	6	1	2	2365				734	734	734	C4_01447	GR8_02536	HM-7_03760	MTCC-B6033_01627	SH-B11_01644	TUAT1_01574
group_3853		hypothetical protein	6	6	1	2	2493				401	401	401	C4_01571	GR8_02660	HM-7_03883	MTCC-B6033_01752	SH-B11_01770	TUAT1_01698
tlyC_2		Hemolysin C	6	6	1	2	4908				1292	1292	1292	C4_02754	GR8_00070	HM-7_01146	MTCC-B6033_02961	SH-B11_03038	TUAT1_02948
group_3855		Nucleoid-associated protein	6	6	1	2	3824				365	365	365	C4_03697	GR8_01016	HM-7_02078	MTCC-B6033_00028	SH-B11_00030	TUAT1_00028
group_3856		hypothetical protein	6	6	1	2	4157				419	419	419	C4_03399	GR8_00724	HM-7_01787	MTCC-B6033_03608	SH-B11_03687	TUAT1_03594
hprK		HPr kinase/phosphorylase	6	6	1	2	4532				932	932	932	C4_03078	GR8_00401	HM-7_01472	MTCC-B6033_03288	SH-B11_03354	TUAT1_03273
yclM		Aspartokinase 3	6	6	1	2	985				1376	1376	1376	C4_00326	GR8_01420	HM-7_02490	MTCC-B6033_00425	SH-B11_00428	TUAT1_00449
adeC		Adenine deaminase	6	6	1	2	2203				1730	1730	1730	C4_01292	GR8_02381	HM-7_03605	MTCC-B6033_01472	SH-B11_01489	TUAT1_01420
rlmCD_2		23S rRNA (uracil-C(5))-methyltransferase RlmCD	6	6	1	2	1409				1385	1397	1387	C4_00674	GR8_01763	HM-7_02985	MTCC-B6033_00787	SH-B11_00824	TUAT1_00805
group_3860		hypothetical protein	6	6	1	2	5083				800	800	800	C4_02583	GR8_03682	HM-7_00966	MTCC-B6033_02777	SH-B11_02853	TUAT1_02768
cydA		Cytochrome bd ubiquinol oxidase subunit 1	6	6	1	2	4108				1415	1415	1415	C4_03447	GR8_00769	HM-7_01832	MTCC-B6033_03653	SH-B11_03738	TUAT1_03639
sppA		Putative signal peptide peptidase SppA	6	6	1	2	5147				1001	1001	1001	C4_02525	GR8_03624	HM-7_00909	MTCC-B6033_02719	SH-B11_02795	TUAT1_02713
asnB		Asparagine synthetase [glutamine-hydrolyzing] 1	6	6	1	2	5029				1898	1898	1898	C4_02632	GR8_03729	HM-7_01014	MTCC-B6033_02825	SH-B11_02902	TUAT1_02816
purQ		Phosphoribosylformylglycinamidine synthase subunit PurQ	6	6	1	2	1248				683	683	683	C4_00538	GR8_01632	HM-7_02853	MTCC-B6033_00652	SH-B11_00676	TUAT1_00671
group_3865		putative FAD-linked oxidoreductase	6	6	1	2	2678				1406	1409	1408	C4_01730	GR8_02827	HM-7_04047	MTCC-B6033_01914	SH-B11_01923	TUAT1_01853
group_3866		hypothetical protein	6	6	1	2	5099				323	323	323	C4_02567	GR8_03666	HM-7_00950	MTCC-B6033_02761	SH-B11_02837	TUAT1_02752
addB		ATP-dependent helicase/deoxyribonuclease subunit B	6	6	1	2	1725				3509	3509	3509	C4_00936	GR8_02029	HM-7_03249	MTCC-B6033_01111	SH-B11_01088	TUAT1_01068
glpP		Glycerol uptake operon antiterminator regulatory protein	6	6	1	2	1568				557	557	557	C4_00822	GR8_01914	HM-7_03134	MTCC-B6033_00941	SH-B11_00975	TUAT1_00954
licH_2		putative 6-phospho-beta-glucosidase	6	6	1	2	4124				1328	1328	1328	C4_03431	GR8_00753	HM-7_01816	MTCC-B6033_03637	SH-B11_03722	TUAT1_03623
thrB		Homoserine kinase	6	6	1	2	4816				932	932	932	C4_02839	GR8_00155	HM-7_01231	MTCC-B6033_03048	SH-B11_03126	TUAT1_03035
hemL		Glutamate-1-semialdehyde 2,1-aminomutase	6	6	1	2	5339				1292	1292	1292	C4_02400	GR8_03497	HM-7_00783	MTCC-B6033_02589	SH-B11_02661	TUAT1_02534
melA		Alpha-galactosidase	6	6	1	2	2630				1331	1331	1331	C4_01686	GR8_02780	HM-7_04003	MTCC-B6033_01867	SH-B11_01878	TUAT1_01812
gerD		Spore germination protein GerD	6	6	1	2	702				578	578	578	C4_00084	GR8_01175	HM-7_02238	MTCC-B6033_00188	SH-B11_00189	TUAT1_00191
pncB2		Nicotinate phosphoribosyltransferase pncB2	6	6	1	2	4855				1469	1469	1469	C4_02801	GR8_00117	HM-7_01193	MTCC-B6033_03010	SH-B11_03086	TUAT1_02995
padC		Phenolic acid decarboxylase PadC	6	6	1	2	1359				485	485	485	C4_00630	GR8_01721	HM-7_02942	MTCC-B6033_00745	SH-B11_00782	TUAT1_00763
cadA		Cadmium, zinc and cobalt-transporting ATPase	6	6	1	2	4674				2099	2099	2099	C4_02957	GR8_00274	HM-7_01350	MTCC-B6033_03168	SH-B11_03233	TUAT1_03156
nagC		N-acetylglucosamine repressor	6	6	1	2	2720				1160	1160	1160	C4_01769	GR8_02865	HM-7_04085	MTCC-B6033_01952	SH-B11_01960	TUAT1_01891
metE_1		5-methyltetrahydropteroyltriglutamate--homocysteine methyltransferase	6	6	1	2	2012				2288	2288	2288	C4_01161	GR8_02251	HM-7_03475	MTCC-B6033_01339	SH-B11_01309	TUAT1_01288
psiE		Protein PsiE	6	6	1	2	4781				428	428	428	C4_02868	GR8_00185	HM-7_01261	MTCC-B6033_03079	SH-B11_03155	TUAT1_03065
bmrR_1		Multidrug-efflux transporter 1 regulator	6	6	1	2	1418				827	827	827	C4_00680	GR8_01769	HM-7_02991	MTCC-B6033_00800	SH-B11_00830	TUAT1_00808
acsA_1		Acetyl-coenzyme A synthetase	6	6	1	2	5126				1580	1580	1580	C4_02540	GR8_03643	HM-7_00927	MTCC-B6033_02736	SH-B11_02814	TUAT1_02729
group_3881		hypothetical protein	6	6	1	2	3376				881	881	881	C4_02182	GR8_03279	HM-7_00557	MTCC-B6033_02367	SH-B11_02379	TUAT1_02309
group_3882		hypothetical protein	6	6	1	2	2036				716	716	716	C4_01183	GR8_02273	HM-7_03497	MTCC-B6033_01362	SH-B11_01332	TUAT1_01311
gluP_1		Rhomboid protease GluP	6	6	1	2	1079				605	605	605	C4_00407	GR8_01506	HM-7_02571	MTCC-B6033_00505	SH-B11_00518	TUAT1_00532
dgoT		D-galactonate transporter	6	6	1	2	917				1310	1310	1310	C4_00262	GR8_01357	HM-7_02426	MTCC-B6033_00366	SH-B11_00364	TUAT1_00379
menG		Demethylmenaquinone methyltransferase	6	6	1	2	3120				704	707	704	C4_01944	GR8_03042	HM-7_00318	MTCC-B6033_02129	SH-B11_02139	TUAT1_02071
ponA		Penicillin-binding protein 1A/1B	6	6	1	2	3077				2672	2687	2682	C4_01902	GR8_03000	HM-7_00276	MTCC-B6033_02087	SH-B11_02097	TUAT1_02029
group_3887		hypothetical protein	6	6	1	2	5188				386	386	386	C4_02486	GR8_03584	HM-7_00870	MTCC-B6033_02679	SH-B11_02755	TUAT1_02673
group_3888		PhoH-like protein	6	6	1	2	2235				1292	1292	1292	C4_01319	GR8_02408	HM-7_03632	MTCC-B6033_01499	SH-B11_01516	TUAT1_01447
csbB		Putative glycosyltransferase CsbB	6	6	1	2	1475				983	983	983	C4_00724	GR8_01814	HM-7_03035	MTCC-B6033_00844	SH-B11_00874	TUAT1_00852
yceC		Stress response protein SCP2	6	6	1	2	874				602	602	602	C4_00226	GR8_01319	HM-7_02385	MTCC-B6033_00330	SH-B11_00328	TUAT1_00343
nprA		Transcriptional activator NprA	6	6	1	2	1465				1256	1256	1256	C4_00714	GR8_01804	HM-7_03025	MTCC-B6033_00834	SH-B11_00864	TUAT1_00842
yfmS_4		Putative sensory transducer protein YfmS	6	6	1	2	4019				1514	1514	1514	C4_03527	GR8_00849	HM-7_01909	MTCC-B6033_03737	SH-B11_03818	TUAT1_03716
cycA		D-serine/D-alanine/glycine transporter	6	6	1	2	3968				1346	1346	1346	C4_03572	GR8_00893	HM-7_01953	MTCC-B6033_03791	SH-B11_03869	TUAT1_03760
rapA_1		Response regulator aspartate phosphatase A	6	6	1	2	2006				1136	1136	1136	C4_01156	GR8_02246	HM-7_03470	MTCC-B6033_01333	SH-B11_01303	TUAT1_01283
yhaU		K(+)/H(+) antiporter YhaU	6	6	1	2	1621				1223	1223	1223	C4_00871	GR8_01964	HM-7_03183	MTCC-B6033_00988	SH-B11_01022	TUAT1_01002
glpD		Aerobic glycerol-3-phosphate dehydrogenase	6	6	1	2	1571				1661	1661	1661	C4_00825	GR8_01917	HM-7_03137	MTCC-B6033_00944	SH-B11_00978	TUAT1_00957
grpE		Protein GrpE	6	6	1	2	3415				557	557	557	C4_02219	GR8_03316	HM-7_00594	MTCC-B6033_02404	SH-B11_02417	TUAT1_02346
walK		Sensor histidine kinase WalK	6	6	1	2	3901				1838	1838	1838	C4_03618	GR8_00934	HM-7_01994	MTCC-B6033_03837	SH-B11_03909	TUAT1_03799
araQ_4		L-arabinose transport system permease protein AraQ	6	6	1	2	3998				842	842	842	C4_03544	GR8_00866	HM-7_01926	MTCC-B6033_03756	SH-B11_03835	TUAT1_03733
ykkD_1		Multidrug resistance protein YkkD	6	6	1	2	1437				314	314	314	C4_00693	GR8_01783	HM-7_03004	MTCC-B6033_00813	SH-B11_00843	TUAT1_00821
sdhA		L-serine dehydratase, alpha chain	6	6	1	2	2348				905	905	905	C4_01431	GR8_02520	HM-7_03744	MTCC-B6033_01611	SH-B11_01628	TUAT1_01558
pdaA_2		Peptidoglycan-N-acetylmuramic acid deacetylase PdaA	6	6	1	2	2437				953	953	953	C4_01519	GR8_02608	HM-7_03832	MTCC-B6033_01700	SH-B11_01716	TUAT1_01646
yheI		putative multidrug resistance ABC transporter ATP-binding/permease protein YheI	6	6	1	2	1604				1757	1757	1757	C4_00856	GR8_01947	HM-7_03168	MTCC-B6033_00973	SH-B11_01006	TUAT1_00987
alsD		Alpha-acetolactate decarboxylase	6	6	1	2	4390				770	770	770	C4_03202	GR8_00525	HM-7_01597	MTCC-B6033_03416	SH-B11_03482	TUAT1_03397
acdA		Acyl-CoA dehydrogenase	6	6	1	2	4297				1142	1142	1142	C4_03291	GR8_00614	HM-7_01686	MTCC-B6033_03499	SH-B11_03572	TUAT1_03486
group_3905		hypothetical protein	6	6	1	2	882				1616	1616	1616	C4_00234	GR8_01327	HM-7_02393	MTCC-B6033_00338	SH-B11_00336	TUAT1_00351
group_3906		hypothetical protein	6	6	1	2	5193				869	869	869	C4_02481	GR8_03579	HM-7_00865	MTCC-B6033_02674	SH-B11_02750	TUAT1_02668
mccA		O-acetylserine dependent cystathionine beta-synthase	6	6	1	2	5436				923	923	923	C4_02308	GR8_03406	HM-7_00692	MTCC-B6033_02498	SH-B11_02570	TUAT1_02443
pheT_1		Phenylalanine--tRNA ligase beta subunit	6	6	1	2	5211				2414	2414	2414	C4_02466	GR8_03564	HM-7_00850	MTCC-B6033_02658	SH-B11_02732	TUAT1_02653
group_3909		hypothetical protein	6	6	1	2	3819				614	614	614	C4_03702	GR8_01026	HM-7_02088	MTCC-B6033_00038	SH-B11_00040	TUAT1_00038
ykkC_1		Multidrug resistance protein YkkC	6	6	1	2	1438				344	344	344	C4_00694	GR8_01784	HM-7_03005	MTCC-B6033_00814	SH-B11_00844	TUAT1_00822
cotS		Spore coat protein S	6	6	1	2	4812				1040	1040	1040	C4_02843	GR8_00159	HM-7_01235	MTCC-B6033_03052	SH-B11_03130	TUAT1_03039
feuB_2		Iron-uptake system permease protein FeuB	6	6	1	2	4689				1052	1052	1052	C4_02942	GR8_00259	HM-7_01335	MTCC-B6033_03153	SH-B11_03218	TUAT1_03141
bshB1		N-acetyl-alpha-D-glucosaminyl L-malate deacetylase 1	6	6	1	2	3092				704	704	704	C4_01916	GR8_03014	HM-7_00290	MTCC-B6033_02101	SH-B11_02111	TUAT1_02043
tsaE		tRNA threonylcarbamoyladenosine biosynthesis protein TsaE	6	6	1	2	1181				476	476	476	C4_00487	GR8_01581	HM-7_02652	MTCC-B6033_00594	SH-B11_00607	TUAT1_00612
group_3914		hypothetical protein	6	6	1	2	4384				1607	1607	1607	C4_03208	GR8_00531	HM-7_01603	MTCC-B6033_03422	SH-B11_03488	TUAT1_03403
sufS		Cysteine desulfurase SufS	6	6	1	2	4757				1220	1220	1220	C4_02879	GR8_00198	HM-7_01272	MTCC-B6033_03090	SH-B11_03165	TUAT1_03080
group_3916		putative oxidoreductase	6	6	1	2	4346				2348	2348	2348	C4_03246	GR8_00569	HM-7_01641	MTCC-B6033_03454	SH-B11_03521	TUAT1_03441
sufB_2		FeS cluster assembly protein SufB	6	6	1	2	4756				1313	1313	1313	C4_02880	GR8_00199	HM-7_01273	MTCC-B6033_03091	SH-B11_03166	TUAT1_03081
gerN		Na(+)/H(+)-K(+) antiporter GerN	6	6	1	2	1830				1847	1847	1847	C4_01034	GR8_02132	HM-7_03347	MTCC-B6033_01209	SH-B11_01186	TUAT1_01166
ald		Alanine dehydrogenase	6	6	1	2	4836				1136	1136	1136	C4_02819	GR8_00135	HM-7_01211	MTCC-B6033_03028	SH-B11_03104	TUAT1_03013
yvdT		putative HTH-type transcriptional regulator YvdT	6	6	1	2	1442				557	641	571	C4_00695	GR8_01785	HM-7_03006	MTCC-B6033_00815	SH-B11_00845	TUAT1_00823
yodB_1		HTH-type transcriptional regulator YodB	6	6	1	2	2771				332	332	332	C4_01816	GR8_02913	HM-7_04133	MTCC-B6033_02001	SH-B11_02008	TUAT1_01940
group_3921		hypothetical protein	6	6	1	2	1049				1826	1826	1826	C4_00379	GR8_01474	HM-7_02543	MTCC-B6033_00477	SH-B11_00489	TUAT1_00502
caaD		Cytochrome c oxidase subunit 4B	6	6	1	2	2247				329	329	329	C4_01331	GR8_02420	HM-7_03644	MTCC-B6033_01511	SH-B11_01528	TUAT1_01459
group_3923		Dihydrolipoyl dehydrogenase	6	6	1	2	1973				1382	1382	1382	C4_01125	GR8_02214	HM-7_03439	MTCC-B6033_01302	SH-B11_01272	TUAT1_01252
mrnC		Mini-ribonuclease 3	6	6	1	2	3749				431	431	431	C4_00013	GR8_01113	HM-7_02175	MTCC-B6033_00126	SH-B11_00127	TUAT1_00125
group_3925		Riboflavin biosynthesis protein	6	6	1	2	4093				761	761	761	C4_03460	GR8_00782	HM-7_01845	MTCC-B6033_03666	SH-B11_03751	TUAT1_03652
ylxH		Flagellum site-determining protein YlxH	6	6	1	2	2404				905	905	905	C4_01486	GR8_02575	HM-7_03799	MTCC-B6033_01666	SH-B11_01683	TUAT1_01613
cysH		Phosphoadenosine phosphosulfate reductase	6	6	1	2	2319				701	701	701	C4_01403	GR8_02492	HM-7_03716	MTCC-B6033_01583	SH-B11_01600	TUAT1_01530
qoxB		Quinol oxidase subunit 1	6	6	1	2	4165				1958	1958	1958	C4_03391	GR8_00716	HM-7_01779	MTCC-B6033_03600	SH-B11_03679	TUAT1_03586
ung		Uracil-DNA glycosylase	6	6	1	2	4187				686	686	686	C4_03373	GR8_00698	HM-7_01760	MTCC-B6033_03582	SH-B11_03658	TUAT1_03568
group_393		hypothetical protein	6	6	1	2	1455				758	758	758	C4_00705	GR8_01795	HM-7_03016	MTCC-B6033_00825	SH-B11_00855	TUAT1_00833
aroB		3-dehydroquinate synthase	6	6	1	2	3115				1091	1091	1091	C4_01939	GR8_03037	HM-7_00313	MTCC-B6033_02124	SH-B11_02134	TUAT1_02066
mcpA_2		Methyl-accepting chemotaxis protein McpA	6	6	1	2	1002				1748	1748	1748	C4_00343	GR8_01437	HM-7_02507	MTCC-B6033_00441	SH-B11_00445	TUAT1_00466
group_3932		hypothetical protein	6	6	1	2	1642				1220	1220	1220	C4_00891	GR8_01984	HM-7_03203	MTCC-B6033_01008	SH-B11_01042	TUAT1_01022
aroC		Chorismate synthase	6	6	1	2	3116				1172	1172	1172	C4_01940	GR8_03038	HM-7_00314	MTCC-B6033_02125	SH-B11_02135	TUAT1_02067
purL		Phosphoribosylformylglycinamidine synthase subunit PurL	6	6	1	2	1249				2231	2231	2231	C4_00539	GR8_01633	HM-7_02854	MTCC-B6033_00653	SH-B11_00677	TUAT1_00672
group_3935		hypothetical protein	6	6	1	2	1565				917	917	917	C4_00819	GR8_01911	HM-7_03131	MTCC-B6033_00938	SH-B11_00972	TUAT1_00951
acsA_2		Acetyl-coenzyme A synthetase	6	6	1	2	5105				1724	1724	1724	C4_02561	GR8_03660	HM-7_00944	MTCC-B6033_02753	SH-B11_02831	TUAT1_02746
group_3937		hypothetical protein	6	6	1	2	2255				449	449	449	C4_01339	GR8_02428	HM-7_03652	MTCC-B6033_01519	SH-B11_01536	TUAT1_01467
asnS		Asparagine--tRNA ligase	6	6	1	2	3082				1295	1295	1295	C4_01906	GR8_03004	HM-7_00280	MTCC-B6033_02091	SH-B11_02101	TUAT1_02033
group_3939		hypothetical protein	6	6	1	2	3814				440	440	440	C4_03707	GR8_01031	HM-7_02093	MTCC-B6033_00043	SH-B11_00045	TUAT1_00043
yfiT		Putative metal-dependent hydrolase YfiT	6	6	1	2	1459				527	530	527	C4_00708	GR8_01798	HM-7_03019	MTCC-B6033_00828	SH-B11_00858	TUAT1_00836
mrpA		Na(+)/H(+) antiporter subunit A	6	6	1	2	4871				2411	2411	2411	C4_02786	GR8_00102	HM-7_01178	MTCC-B6033_02995	SH-B11_03071	TUAT1_02980
sat		Sulfate adenylyltransferase	6	6	1	2	2321				1136	1136	1136	C4_01405	GR8_02494	HM-7_03718	MTCC-B6033_01585	SH-B11_01602	TUAT1_01532
scoB		putative succinyl-CoA:3-ketoacid coenzyme A transferase subunit B	6	6	1	2	1260				665	665	665	C4_00550	GR8_01644	HM-7_02865	MTCC-B6033_00664	SH-B11_00688	TUAT1_00684
group_3943		hypothetical protein	6	6	1	2	4957				1046	1046	1046	C4_02711	GR8_00027	HM-7_01103	MTCC-B6033_02917	SH-B11_02995	TUAT1_02905
zwf		Glucose-6-phosphate 1-dehydrogenase	6	6	1	2	3237				1475	1475	1475	C4_02054	GR8_03152	HM-7_00429	MTCC-B6033_02241	SH-B11_02252	TUAT1_02182
group_3945		hypothetical protein	6	6	1	2	2254				407	407	407	C4_01338	GR8_02427	HM-7_03651	MTCC-B6033_01518	SH-B11_01535	TUAT1_01466
dinG_1		putative ATP-dependent helicase DinG	6	6	1	2	3058				1937	1937	1937	C4_01885	GR8_02982	HM-7_00259	MTCC-B6033_02069	SH-B11_02079	TUAT1_02011
hxlR_1		HTH-type transcriptional activator HxlR	6	6	1	2	2607				344	344	344	C4_01667	GR8_02760	HM-7_03984	MTCC-B6033_01847	SH-B11_01860	TUAT1_01796
group_3948		hypothetical protein	6	6	1	2	709				1247	1247	1247	C4_00093	GR8_01185	HM-7_02248	MTCC-B6033_00198	SH-B11_00199	TUAT1_00203
group_3949		hypothetical protein	6	6	1	2	1633				518	518	518	C4_00882	GR8_01975	HM-7_03194	MTCC-B6033_00999	SH-B11_01033	TUAT1_01013
flgG_2		Flagellar basal-body rod protein FlgG	6	6	1	2	4375				818	818	818	C4_03217	GR8_00540	HM-7_01612	MTCC-B6033_03431	SH-B11_03497	TUAT1_03412
resE_4		Sensor histidine kinase ResE	6	6	1	2	4514				1418	1418	1418	C4_03096	GR8_00419	HM-7_01490	MTCC-B6033_03306	SH-B11_03372	TUAT1_03291
group_3952		hypothetical protein	6	6	1	2	5314				1166	1166	1166	C4_02426	GR8_03520	HM-7_00809	MTCC-B6033_02612	SH-B11_02687	TUAT1_02557
essB		ESAT-6 secretion machinery protein EssB	6	6	1	2	4840				1313	1313	1313	C4_02815	GR8_00131	HM-7_01207	MTCC-B6033_03024	SH-B11_03100	TUAT1_03009
trpP		putative tryptophan transport protein	6	6	1	2	1638				518	518	518	C4_00887	GR8_01980	HM-7_03199	MTCC-B6033_01004	SH-B11_01038	TUAT1_01018
argB		Acetylglutamate kinase	6	6	1	2	1777				776	776	776	C4_00988	GR8_02081	HM-7_03301	MTCC-B6033_01163	SH-B11_01140	TUAT1_01120
ydcV		Inner membrane ABC transporter permease protein YdcV	6	6	1	2	948				803	803	803	C4_00293	GR8_01385	HM-7_02454	MTCC-B6033_00394	SH-B11_00395	TUAT1_00410
mcpB_2		Methyl-accepting chemotaxis protein McpB	6	6	1	2	4915				1976	1976	1976	C4_02747	GR8_00063	HM-7_01139	MTCC-B6033_02954	SH-B11_03031	TUAT1_02941
ytkD		Putative 8-oxo-dGTP diphosphatase YtkD	6	6	1	2	5017				476	476	476	C4_02644	GR8_03741	HM-7_01026	MTCC-B6033_02837	SH-B11_02914	TUAT1_02828
yjbM		GTP pyrophosphokinase YjbM	6	6	1	2	1826				629	629	629	C4_01030	GR8_02128	HM-7_03343	MTCC-B6033_01205	SH-B11_01182	TUAT1_01162
ydjA		Putative NAD(P)H nitroreductase YdjA	6	6	1	2	1466				665	665	665	C4_00715	GR8_01805	HM-7_03026	MTCC-B6033_00835	SH-B11_00865	TUAT1_00843
group_3960		hypothetical protein	6	6	1	2	1505				347	347	347	C4_00750	GR8_01840	HM-7_03061	MTCC-B6033_00870	SH-B11_00900	TUAT1_00878
pheS		Phenylalanine--tRNA ligase alpha subunit	6	6	1	2	5210				1034	1034	1034	C4_02467	GR8_03565	HM-7_00851	MTCC-B6033_02659	SH-B11_02733	TUAT1_02654
aspA_1		Aspartate ammonia-lyase	6	6	1	2	4666				1445	1445	1445	C4_02965	GR8_00282	HM-7_01358	MTCC-B6033_03176	SH-B11_03241	TUAT1_03164
sleB_2		Spore cortex-lytic enzyme	6	6	1	2	3140				911	920	914	C4_01965	GR8_03062	HM-7_00338	MTCC-B6033_02149	SH-B11_02159	TUAT1_02092
group_3964		PTS system EIIBC component	6	6	1	2	712				1379	1379	1379	C4_00096	GR8_01188	HM-7_02251	MTCC-B6033_00201	SH-B11_00202	TUAT1_00206
rlmI		Ribosomal RNA large subunit methyltransferase I	6	6	1	2	4141				1181	1181	1181	C4_03416	GR8_00738	HM-7_01801	MTCC-B6033_03622	SH-B11_03707	TUAT1_03608
corA		Cobalt/magnesium transport protein CorA	6	6	1	2	1404				959	959	959	C4_00671	GR8_01760	HM-7_02982	MTCC-B6033_00784	SH-B11_00821	TUAT1_00802
divIVA		Septum site-determining protein DivIVA	6	6	1	2	2303				494	494	494	C4_01387	GR8_02476	HM-7_03700	MTCC-B6033_01567	SH-B11_01584	TUAT1_01514
group_3968		hypothetical protein	6	6	1	2	2698				692	692	692	C4_01748	GR8_02844	HM-7_04064	MTCC-B6033_01931	SH-B11_01939	TUAT1_01870
pitA		Low-affinity inorganic phosphate transporter 1	6	6	1	2	1957				998	998	998	C4_01109	GR8_02198	HM-7_03423	MTCC-B6033_01286	SH-B11_01256	TUAT1_01236
sspK		Small, acid-soluble spore protein K	6	6	1	2	1473				149	149	149	C4_00722	GR8_01812	HM-7_03033	MTCC-B6033_00842	SH-B11_00872	TUAT1_00850
yodC_2		Putative NAD(P)H nitroreductase YodC	6	6	1	2	4038				638	638	638	C4_03511	GR8_00833	HM-7_01893	MTCC-B6033_03719	SH-B11_03802	TUAT1_03700
ywqC		putative capsular polysaccharide biosynthesis protein YwqC	6	6	1	2	4591				731	731	731	C4_03030	GR8_00347	HM-7_01423	MTCC-B6033_03240	SH-B11_03305	TUAT1_03229
ntdC		Glucose-6-phosphate 3-dehydrogenase	6	6	1	2	896				1046	1046	1046	C4_00248	GR8_01341	HM-7_02407	MTCC-B6033_00352	SH-B11_00350	TUAT1_00365
ribH		6,7-dimethyl-8-ribityllumazine synthase	6	6	1	2	3174				464	464	464	C4_01997	GR8_03094	HM-7_00371	MTCC-B6033_02181	SH-B11_02191	TUAT1_02124
metI		Cystathionine gamma-synthase/O-acetylhomoserine (thiol)-lyase	6	6	1	2	1858				1151	1151	1151	C4_01059	GR8_02157	HM-7_03372	MTCC-B6033_01234	SH-B11_01213	TUAT1_01191
rluD_3		Ribosomal large subunit pseudouridine synthase D	6	6	1	2	2307				914	914	914	C4_01391	GR8_02480	HM-7_03704	MTCC-B6033_01571	SH-B11_01588	TUAT1_01518
ndk		Nucleoside diphosphate kinase	6	6	1	2	3118				446	446	446	C4_01942	GR8_03040	HM-7_00316	MTCC-B6033_02127	SH-B11_02137	TUAT1_02069
group_3977		Putative multidrug export ATP-binding/permease protein	6	6	1	2	1495				1742	1742	1742	C4_00740	GR8_01830	HM-7_03051	MTCC-B6033_00860	SH-B11_00890	TUAT1_00868
etfB		Electron transfer flavoprotein subunit beta	6	6	1	2	5223				773	773	773	C4_02455	GR8_03553	HM-7_00839	MTCC-B6033_02647	SH-B11_02721	TUAT1_02642
lysA		Diaminopimelate decarboxylase	6	6	1	2	3183				1331	1331	1331	C4_02006	GR8_03103	HM-7_00380	MTCC-B6033_02190	SH-B11_02200	TUAT1_02133
group_398		hypothetical protein	6	6	1	2	1474				272	272	272	C4_00723	GR8_01813	HM-7_03034	MTCC-B6033_00843	SH-B11_00873	TUAT1_00851
accD		Acetyl-coenzyme A carboxylase carboxyl transferase subunit beta	6	6	1	2	5170				875	875	875	C4_02504	GR8_03602	HM-7_00888	MTCC-B6033_02697	SH-B11_02773	TUAT1_02691
rplX		50S ribosomal protein L24	6	6	1	2	3718				311	311	311	C4_00044	GR8_01144	HM-7_02206	MTCC-B6033_00157	SH-B11_00158	TUAT1_00156
murC		UDP-N-acetylmuramate--L-alanine ligase	6	6	1	2	5096				1298	1298	1298	C4_02570	GR8_03669	HM-7_00953	MTCC-B6033_02764	SH-B11_02840	TUAT1_02755
queA		S-adenosylmethionine:tRNA ribosyltransferase-isomerase	6	6	1	2	5381				1028	1028	1028	C4_02360	GR8_03457	HM-7_00743	MTCC-B6033_02549	SH-B11_02621	TUAT1_02494
yrrK		Putative pre-16S rRNA nuclease	6	6	1	2	5419				416	416	416	C4_02325	GR8_03422	HM-7_00708	MTCC-B6033_02514	SH-B11_02586	TUAT1_02459
ghrB_1		Glyoxylate/hydroxypyruvate reductase B	6	6	1	2	4813				968	968	968	C4_02842	GR8_00158	HM-7_01234	MTCC-B6033_03051	SH-B11_03129	TUAT1_03038
spoVAD		Stage V sporulation protein AD	6	6	1	2	3187				1016	1016	1016	C4_02010	GR8_03107	HM-7_00384	MTCC-B6033_02194	SH-B11_02204	TUAT1_02137
yhjX		putative MFS-type transporter YhjX	6	6	1	2	4347				1265	1265	1265	C4_03245	GR8_00568	HM-7_01640	MTCC-B6033_03453	SH-B11_03520	TUAT1_03440
flgC		Flagellar basal-body rod protein FlgC	6	6	1	2	2381				452	452	452	C4_01463	GR8_02552	HM-7_03776	MTCC-B6033_01643	SH-B11_01660	TUAT1_01590
znuA		High-affinity zinc uptake system binding-protein ZnuA	6	6	1	2	5005				992	992	992	C4_02656	GR8_03753	HM-7_01038	MTCC-B6033_02849	SH-B11_02926	TUAT1_02840
group_399		hypothetical protein	6	6	1	2	1476				2591	2591	2591	C4_00725	GR8_01815	HM-7_03036	MTCC-B6033_00845	SH-B11_00875	TUAT1_00853
xylB_1		Aryl-alcohol dehydrogenase	6	6	1	2	1927				1112	1112	1112	C4_01094	GR8_02183	HM-7_03408	MTCC-B6033_01271	SH-B11_01242	TUAT1_01220
group_3991		hypothetical protein	6	6	1	2	965				644	644	644	C4_00307	GR8_01402	HM-7_02469	MTCC-B6033_00406	SH-B11_00406	TUAT1_00427
gmuA_1		PTS system oligo-beta-mannoside-specific EIIA component	6	6	1	2	3241				332	332	332	C4_02058	GR8_03156	HM-7_00433	MTCC-B6033_02245	SH-B11_02256	TUAT1_02186
group_3993		hypothetical protein	6	6	1	2	5376				644	644	644	C4_02365	GR8_03462	HM-7_00748	MTCC-B6033_02554	SH-B11_02626	TUAT1_02499
group_3994		hypothetical protein	6	6	1	2	4907				683	683	683	C4_02755	GR8_00071	HM-7_01147	MTCC-B6033_02962	SH-B11_03039	TUAT1_02949
ubiE		Ubiquinone/menaquinone biosynthesis C-methyltransferase UbiE	6	6	1	2	1027				611	611	611	C4_00363	GR8_01457	HM-7_02527	MTCC-B6033_00461	SH-B11_00471	TUAT1_00486
sunS		SPBc2 prophage-derived glycosyltransferase SunS	6	6	1	2	1334				1073	1073	1073	C4_00608	GR8_01698	HM-7_02920	MTCC-B6033_00719	SH-B11_00759	TUAT1_00741
glmM		Phosphoglucosamine mutase	6	6	1	2	721				1346	1346	1346	C4_00109	GR8_01201	HM-7_02264	MTCC-B6033_00214	SH-B11_00215	TUAT1_00219
yloB		Calcium-transporting ATPase	6	6	1	2	2328				2675	2675	2675	C4_01411	GR8_02500	HM-7_03724	MTCC-B6033_01591	SH-B11_01608	TUAT1_01538
tenA_1		Aminopyrimidine aminohydrolase	6	6	1	2	1831				710	710	710	C4_01035	GR8_02133	HM-7_03348	MTCC-B6033_01210	SH-B11_01187	TUAT1_01167
group_4000		hypothetical protein	6	6	1	2	872				1040	1040	1040	C4_00224	GR8_01317	HM-7_02383	MTCC-B6033_00328	SH-B11_00326	TUAT1_00341
hemL1		Glutamate-1-semialdehyde 2,1-aminomutase 1	6	6	1	2	1502				1295	1298	1295	C4_00747	GR8_01837	HM-7_03058	MTCC-B6033_00867	SH-B11_00897	TUAT1_00875
scpB		Segregation and condensation protein B	6	6	1	2	3169				593	593	593	C4_01992	GR8_03089	HM-7_00366	MTCC-B6033_02176	SH-B11_02186	TUAT1_02119
lrp_2		Leucine-responsive regulatory protein	6	6	1	2	4389				476	476	476	C4_03203	GR8_00526	HM-7_01598	MTCC-B6033_03417	SH-B11_03483	TUAT1_03398
ribZ		Riboflavin transporter RibZ	6	6	1	2	4517				1334	1334	1334	C4_03093	GR8_00416	HM-7_01487	MTCC-B6033_03303	SH-B11_03369	TUAT1_03288
speB		Agmatinase	6	6	1	2	4273				872	872	872	C4_03307	GR8_00630	HM-7_01702	MTCC-B6033_03516	SH-B11_03589	TUAT1_03502
group_4006		hypothetical protein	6	6	1	2	2248				878	878	878	C4_01332	GR8_02421	HM-7_03645	MTCC-B6033_01512	SH-B11_01529	TUAT1_01460
fmt		Methionyl-tRNA formyltransferase	6	6	1	2	2336				953	953	953	C4_01419	GR8_02508	HM-7_03732	MTCC-B6033_01599	SH-B11_01616	TUAT1_01546
ramA		(R)-stereoselective amidase	6	6	1	2	1562				1538	1538	1538	C4_00816	GR8_01908	HM-7_03128	MTCC-B6033_00935	SH-B11_00969	TUAT1_00948
kinE_2		Sporulation kinase E	6	6	1	2	2046				2195	2195	2195	C4_01190	GR8_02280	HM-7_03504	MTCC-B6033_01369	SH-B11_01339	TUAT1_01318
sigO		RNA polymerase sigma factor SigO	6	6	1	2	1485				602	602	602	C4_00731	GR8_01821	HM-7_03042	MTCC-B6033_00851	SH-B11_00881	TUAT1_00859
opuCA_1		Glycine betaine/carnitine/choline transport ATP-binding protein OpuCA	6	6	1	2	4636				1148	1148	1148	C4_02990	GR8_00307	HM-7_01383	MTCC-B6033_03200	SH-B11_03265	TUAT1_03189
group_4011		hypothetical protein	6	6	1	2	4125				398	398	398	C4_03430	GR8_00752	HM-7_01815	MTCC-B6033_03636	SH-B11_03721	TUAT1_03622
polC_2		DNA polymerase III PolC-type	6	6	1	2	4886				650	650	650	C4_02773	GR8_00089	HM-7_01165	MTCC-B6033_02982	SH-B11_03057	TUAT1_02967
group_4013		hypothetical protein	6	6	1	2	4505				740	740	740	C4_03105	GR8_00428	HM-7_01499	MTCC-B6033_03315	SH-B11_03381	TUAT1_03300
group_4014		hypothetical protein	6	6	1	2	1977				329	329	329	C4_01129	GR8_02218	HM-7_03443	MTCC-B6033_01306	SH-B11_01276	TUAT1_01256
yfhA_2		putative siderophore transport system permease protein YfhA	6	6	1	2	4106				1013	1013	1013	C4_03449	GR8_00771	HM-7_01834	MTCC-B6033_03655	SH-B11_03740	TUAT1_03641
natR		Transcriptional regulatory protein NatR	6	6	1	2	864				701	701	701	C4_00216	GR8_01308	HM-7_02374	MTCC-B6033_00320	SH-B11_00318	TUAT1_00332
ldh_1		L-lactate dehydrogenase	6	6	1	2	891				947	947	947	C4_00243	GR8_01336	HM-7_02402	MTCC-B6033_00347	SH-B11_00345	TUAT1_00360
gutB_1		Sorbitol dehydrogenase	6	6	1	2	1969				1031	1031	1031	C4_01121	GR8_02210	HM-7_03435	MTCC-B6033_01298	SH-B11_01268	TUAT1_01248
celY		Exoglucanase-2	6	6	1	2	2423				2108	2108	2108	C4_01505	GR8_02594	HM-7_03818	MTCC-B6033_01686	SH-B11_01702	TUAT1_01632
motB		Motility protein B	6	6	1	2	2059				764	767	766	C4_01203	GR8_02293	HM-7_03517	MTCC-B6033_01382	SH-B11_01352	TUAT1_01331
secY		Protein translocase subunit SecY	6	6	1	2	3709				1292	1292	1292	C4_00053	GR8_01153	HM-7_02215	MTCC-B6033_00166	SH-B11_00167	TUAT1_00165
group_4022		hypothetical protein	6	6	1	2	1142				452	452	452	C4_00450	GR8_01545	HM-7_02614	MTCC-B6033_00555	SH-B11_00567	TUAT1_00576
yttP		putative HTH-type transcriptional regulator YttP	6	6	1	2	5116				665	665	665	C4_02548	GR8_03651	HM-7_00935	MTCC-B6033_02744	SH-B11_02822	TUAT1_02737
buk2		Butyrate kinase 2	6	6	1	2	3266				1121	1121	1121	C4_02083	GR8_03181	HM-7_00458	MTCC-B6033_02269	SH-B11_02281	TUAT1_02211
isdF		putative heme-iron transport system permease protein IsdF	6	6	1	2	4102				986	986	986	C4_03453	GR8_00775	HM-7_01838	MTCC-B6033_03659	SH-B11_03744	TUAT1_03645
salA		Iron-sulfur cluster carrier protein	6	6	1	2	701				1058	1058	1058	C4_00083	GR8_01174	HM-7_02237	MTCC-B6033_00187	SH-B11_00188	TUAT1_00190
rhaS		HTH-type transcriptional activator RhaS	6	6	1	2	4159				845	845	845	C4_03397	GR8_00722	HM-7_01785	MTCC-B6033_03606	SH-B11_03685	TUAT1_03592
sigM		ECF RNA polymerase sigma factor SigM	6	6	1	2	1586				491	491	491	C4_00840	GR8_01932	HM-7_03152	MTCC-B6033_00959	SH-B11_00992	TUAT1_00972
clpP_2		ATP-dependent Clp protease proteolytic subunit	6	6	1	2	4567				596	596	596	C4_03046	GR8_00368	HM-7_01440	MTCC-B6033_03257	SH-B11_03323	TUAT1_03241
group_4030		hypothetical protein	6	6	1	2	3290				671	671	671	C4_02107	GR8_03204	HM-7_00482	MTCC-B6033_02292	SH-B11_02304	TUAT1_02234
spoIIAB		Anti-sigma F factor	6	6	1	2	3192				440	440	440	C4_02015	GR8_03112	HM-7_00389	MTCC-B6033_02199	SH-B11_02209	TUAT1_02142
group_4032		hypothetical protein	6	6	1	2	1634				344	344	344	C4_00883	GR8_01976	HM-7_03195	MTCC-B6033_01000	SH-B11_01034	TUAT1_01014
punA		Purine nucleoside phosphorylase 1	6	6	1	2	3195				812	812	812	C4_02018	GR8_03115	HM-7_00392	MTCC-B6033_02202	SH-B11_02212	TUAT1_02145
yhdG_1		putative amino acid permease YhdG	6	6	1	2	853				1382	1382	1382	C4_00205	GR8_01297	HM-7_02363	MTCC-B6033_00309	SH-B11_00307	TUAT1_00321
corC		Magnesium and cobalt efflux protein CorC	6	6	1	2	1590				1382	1382	1382	C4_00844	GR8_01936	HM-7_03156	MTCC-B6033_00963	SH-B11_00996	TUAT1_00976
group_4036		Putative TrmH family tRNA/rRNA methyltransferase	6	6	1	2	3748				749	749	749	C4_00014	GR8_01114	HM-7_02176	MTCC-B6033_00127	SH-B11_00128	TUAT1_00126
ctpA		Carboxy-terminal processing protease CtpA	6	6	1	2	2777				1385	1385	1385	C4_01820	GR8_02917	HM-7_04137	MTCC-B6033_02005	SH-B11_02012	TUAT1_01944
group_4038		hypothetical protein	6	6	1	2	2794				401	401	401	C4_01835	GR8_02932	HM-7_04152	MTCC-B6033_02020	SH-B11_02027	TUAT1_01959
leuD		3-isopropylmalate dehydratase small subunit	6	6	1	2	5324				599	599	599	C4_02416	GR8_03510	HM-7_00799	MTCC-B6033_02602	SH-B11_02677	TUAT1_02547
group_4040		hypothetical protein	6	6	1	2	3423				1019	1019	1019	C4_02227	GR8_03324	HM-7_00602	MTCC-B6033_02412	SH-B11_02425	TUAT1_02354
nth		Endonuclease III	6	6	1	2	3080				662	662	662	C4_01904	GR8_03002	HM-7_00278	MTCC-B6033_02089	SH-B11_02099	TUAT1_02031
group_4042		hypothetical protein	6	6	1	2	4834				1328	1328	1328	C4_02821	GR8_00137	HM-7_01213	MTCC-B6033_03030	SH-B11_03106	TUAT1_03015
group_4043		hypothetical protein	6	6	1	2	1301				371	371	371	C4_00582	GR8_01671	HM-7_02894	MTCC-B6033_00692	SH-B11_00732	TUAT1_00713
kinD		Sporulation kinase D	6	6	1	2	2057				1499	1499	1499	C4_01201	GR8_02291	HM-7_03515	MTCC-B6033_01380	SH-B11_01350	TUAT1_01329
group_4045		Glucosaminate ammonia-lyase	6	6	1	2	3142				971	971	971	C4_01967	GR8_03064	HM-7_00340	MTCC-B6033_02151	SH-B11_02161	TUAT1_02094
yusO_1		putative HTH-type transcriptional regulator YusO	6	6	1	2	851				437	437	437	C4_00203	GR8_01295	HM-7_02361	MTCC-B6033_00307	SH-B11_00305	TUAT1_00319
yusV_2		putative siderophore transport system ATP-binding protein YusV	6	6	1	2	4691				815	815	815	C4_02940	GR8_00257	HM-7_01333	MTCC-B6033_03151	SH-B11_03216	TUAT1_03139
mnmG		tRNA uridine 5-carboxymethylaminomethyl modification enzyme MnmG	6	6	1	2	3851				1886	1886	1886	C4_03669	GR8_00984	HM-7_02045	MTCC-B6033_03888	SH-B11_03964	TUAT1_03849
der_3		GTPase Der	6	6	1	2	3437				1100	1100	1100	C4_02239	GR8_03336	HM-7_00614	MTCC-B6033_02424	SH-B11_02437	TUAT1_02366
group_405		hypothetical protein	6	6	1	2	1518				803	803	803	C4_00776	GR8_01868	HM-7_03088	MTCC-B6033_00899	SH-B11_00928	TUAT1_00908
recJ		Single-stranded-DNA-specific exonuclease RecJ	6	6	1	2	5392				2333	2333	2333	C4_02350	GR8_03447	HM-7_00733	MTCC-B6033_02539	SH-B11_02611	TUAT1_02484
ebpS		Elastin-binding protein EbpS	6	6	1	2	3147				761	764	763	C4_01972	GR8_03069	HM-7_00345	MTCC-B6033_02156	SH-B11_02166	TUAT1_02099
group_4052		hypothetical protein	6	6	1	2	834				482	482	482	C4_00187	GR8_01278	HM-7_02344	MTCC-B6033_00290	SH-B11_00288	TUAT1_00302
lytE		putative peptidoglycan endopeptidase LytE	6	6	1	2	1582				830	830	830	C4_00836	GR8_01928	HM-7_03148	MTCC-B6033_00955	SH-B11_00989	TUAT1_00968
mepA		Multidrug export protein MepA	6	6	1	2	2695				1367	1367	1367	C4_01745	GR8_02841	HM-7_04061	MTCC-B6033_01928	SH-B11_01936	TUAT1_01867
pgpH		Cyclic-di-AMP phosphodiesterase PgpH	6	6	1	2	3398				2153	2153	2153	C4_02204	GR8_03301	HM-7_00579	MTCC-B6033_02389	SH-B11_02401	TUAT1_02331
group_4056		putative oxidoreductase	6	6	1	2	3225				776	776	776	C4_02045	GR8_03143	HM-7_00420	MTCC-B6033_02232	SH-B11_02240	TUAT1_02173
nrdR		Transcriptional repressor NrdR	6	6	1	2	5189				458	458	458	C4_02485	GR8_03583	HM-7_00869	MTCC-B6033_02678	SH-B11_02754	TUAT1_02672
pdhD_3		Dihydrolipoyl dehydrogenase	6	6	1	2	2213				1412	1412	1412	C4_01302	GR8_02391	HM-7_03615	MTCC-B6033_01482	SH-B11_01499	TUAT1_01430
purC		Phosphoribosylaminoimidazole-succinocarboxamide synthase	6	6	1	2	1246				722	722	722	C4_00536	GR8_01630	HM-7_02851	MTCC-B6033_00650	SH-B11_00674	TUAT1_00669
ybiT_1		putative ABC transporter ATP-binding protein YbiT	6	6	1	2	1341				1553	1553	1553	C4_00613	GR8_01703	HM-7_02925	MTCC-B6033_00724	SH-B11_00765	TUAT1_00746
group_4061		hypothetical protein	6	6	1	2	2589				347	347	347	C4_01651	GR8_02747	HM-7_03967	MTCC-B6033_01834	SH-B11_01847	TUAT1_01782
sigB		RNA polymerase sigma-B factor	6	6	1	2	1093				788	788	788	C4_00419	GR8_01518	HM-7_02583	MTCC-B6033_00517	SH-B11_00530	TUAT1_00544
group_4063		hypothetical protein	6	6	1	2	4924				350	350	350	C4_02738	GR8_00054	HM-7_01130	MTCC-B6033_02945	SH-B11_03022	TUAT1_02932
dppE		Dipeptide-binding protein DppE	6	6	1	2	1987				1619	1619	1619	C4_01138	GR8_02227	HM-7_03452	MTCC-B6033_01315	SH-B11_01285	TUAT1_01265
rbsB_1		Ribose import binding protein RbsB	6	6	1	2	4394				917	917	917	C4_03198	GR8_00521	HM-7_01593	MTCC-B6033_03412	SH-B11_03478	TUAT1_03393
gatA		Glutamyl-tRNA(Gln) amidotransferase subunit A	6	6	1	2	1278				1457	1457	1457	C4_00567	GR8_01661	HM-7_02882	MTCC-B6033_00681	SH-B11_00720	TUAT1_00701
secA		Protein translocase subunit SecA	6	6	1	2	4496				2525	2525	2525	C4_03114	GR8_00437	HM-7_01508	MTCC-B6033_03324	SH-B11_03390	TUAT1_03309
cwlC		Sporulation-specific N-acetylmuramoyl-L-alanine amidase	6	6	1	2	2502				758	758	758	C4_01580	GR8_02669	HM-7_03892	MTCC-B6033_01761	SH-B11_01779	TUAT1_01707
citM		Mg(2+)/citrate complex secondary transporter	6	6	1	2	1356				1298	1298	1298	C4_00628	GR8_01719	HM-7_02940	MTCC-B6033_00743	SH-B11_00780	TUAT1_00761
yedQ		putative diguanylate cyclase YedQ	6	6	1	2	1550				968	1091	1070	C4_00804	GR8_01896	HM-7_03116	MTCC-B6033_00923	SH-B11_00957	TUAT1_00936
hemE		Uroporphyrinogen decarboxylase	6	6	1	2	1648				1058	1058	1058	C4_00897	GR8_01990	HM-7_03209	MTCC-B6033_01014	SH-B11_01048	TUAT1_01029
rasP		Regulator of sigma-W protease RasP	6	6	1	2	2419				1259	1259	1259	C4_01501	GR8_02590	HM-7_03814	MTCC-B6033_01681	SH-B11_01698	TUAT1_01628
deoD		Purine nucleoside phosphorylase DeoD-type	6	6	1	2	2783				695	695	695	C4_01824	GR8_02921	HM-7_04141	MTCC-B6033_02009	SH-B11_02016	TUAT1_01948
tgt		Queuine tRNA-ribosyltransferase	6	6	1	2	5382				1145	1145	1145	C4_02359	GR8_03456	HM-7_00742	MTCC-B6033_02548	SH-B11_02620	TUAT1_02493
rapF_1		Response regulator aspartate phosphatase F	6	6	1	2	4376				1055	1055	1055	C4_03216	GR8_00539	HM-7_01611	MTCC-B6033_03430	SH-B11_03496	TUAT1_03411
yitJ		Bifunctional homocysteine S-methyltransferase/5,10-methylenetetrahydrofolate reductase	6	6	1	2	1760				1841	1841	1841	C4_00971	GR8_02064	HM-7_03284	MTCC-B6033_01146	SH-B11_01123	TUAT1_01103
atpA		ATP synthase subunit alpha	6	6	1	2	4335				1508	1508	1508	C4_03257	GR8_00580	HM-7_01652	MTCC-B6033_03465	SH-B11_03532	TUAT1_03452
rplA		50S ribosomal protein L1	6	6	1	2	3742				698	698	698	C4_00020	GR8_01120	HM-7_02182	MTCC-B6033_00133	SH-B11_00134	TUAT1_00132
ispH		4-hydroxy-3-methylbut-2-enyl diphosphate reductase	6	6	1	2	3381				944	944	944	C4_02187	GR8_03284	HM-7_00562	MTCC-B6033_02372	SH-B11_02384	TUAT1_02314
mmgD_2		2-methylcitrate synthase	6	6	1	2	2738				1142	1142	1142	C4_01787	GR8_02883	HM-7_04103	MTCC-B6033_01970	SH-B11_01978	TUAT1_01909
group_408		hypothetical protein	6	6	1	2	1552				416	416	416	C4_00806	GR8_01898	HM-7_03118	MTCC-B6033_00925	SH-B11_00959	TUAT1_00938
ypmQ		SCO1 protein	6	6	1	2	3017				590	590	590	C4_01847	GR8_02944	HM-7_00221	MTCC-B6033_02032	SH-B11_02039	TUAT1_01971
group_4081		hypothetical protein	6	6	1	2	2358				332	332	332	C4_01441	GR8_02530	HM-7_03754	MTCC-B6033_01621	SH-B11_01638	TUAT1_01568
ctaB2		Protoheme IX farnesyltransferase 2	6	6	1	2	2243				917	917	917	C4_01327	GR8_02416	HM-7_03640	MTCC-B6033_01507	SH-B11_01524	TUAT1_01455
polA		DNA polymerase I	6	6	1	2	5182				2639	2639	2639	C4_02492	GR8_03590	HM-7_00876	MTCC-B6033_02685	SH-B11_02761	TUAT1_02679
ohrB		Organic hydroperoxide resistance protein OhrB	6	6	1	2	2009				419	419	419	C4_01159	GR8_02249	HM-7_03473	MTCC-B6033_01337	SH-B11_01307	TUAT1_01286
ulaA		Ascorbate-specific PTS system EIIC component	6	6	1	2	2636				1262	1262	1262	C4_01692	GR8_02786	HM-7_04009	MTCC-B6033_01873	SH-B11_01884	TUAT1_01818
fadR		Fatty acid metabolism regulator protein	6	6	1	2	5220				584	584	584	C4_02457	GR8_03555	HM-7_00841	MTCC-B6033_02649	SH-B11_02723	TUAT1_02644
nudF		ADP-ribose pyrophosphatase	6	6	1	2	3205				557	557	557	C4_02028	GR8_03125	HM-7_00402	MTCC-B6033_02212	SH-B11_02222	TUAT1_02155
iucC		Aerobactin synthase	6	6	1	2	1756				1814	1814	1814	C4_00967	GR8_02060	HM-7_03280	MTCC-B6033_01142	SH-B11_01119	TUAT1_01099
ysdB		Sigma-w pathway protein YsdB	6	6	1	2	5204				404	404	404	C4_02472	GR8_03570	HM-7_00856	MTCC-B6033_02665	SH-B11_02738	TUAT1_02659
group_409		hypothetical protein	6	6	1	2	1554				875	875	875	C4_00808	GR8_01900	HM-7_03120	MTCC-B6033_00927	SH-B11_00961	TUAT1_00940
dgk		Deoxyguanosine kinase	6	6	1	2	3829				623	623	623	C4_03692	GR8_01011	HM-7_02073	MTCC-B6033_00023	SH-B11_00025	TUAT1_00023
rbsC_2		Ribose import permease protein RbsC	6	6	1	2	4132				1013	1013	1013	C4_03424	GR8_00746	HM-7_01809	MTCC-B6033_03630	SH-B11_03715	TUAT1_03616
clpY		ATP-dependent protease ATPase subunit ClpY	6	6	1	2	2378				1400	1400	1400	C4_01460	GR8_02549	HM-7_03773	MTCC-B6033_01640	SH-B11_01657	TUAT1_01587
group_4093		hypothetical protein	6	6	1	2	3940				341	344	343	C4_03593	GR8_00912	HM-7_01972	MTCC-B6033_03813	SH-B11_03886	TUAT1_03779
asd		Aspartate-semialdehyde dehydrogenase	6	6	1	2	2444				1019	1019	1019	C4_01525	GR8_02614	HM-7_03838	MTCC-B6033_01706	SH-B11_01722	TUAT1_01652
group_4095		hypothetical protein	6	6	1	2	3182				884	884	884	C4_02005	GR8_03102	HM-7_00379	MTCC-B6033_02189	SH-B11_02199	TUAT1_02132
ilvB_1		Acetolactate synthase large subunit	6	6	1	2	914				1760	1760	1760	C4_00259	GR8_01354	HM-7_02423	MTCC-B6033_00363	SH-B11_00361	TUAT1_00376
walR_4		Transcriptional regulatory protein WalR	6	6	1	2	3900				707	707	707	C4_03619	GR8_00935	HM-7_01995	MTCC-B6033_03838	SH-B11_03910	TUAT1_03800
ybbH_1		putative HTH-type transcriptional regulator YbbH	6	6	1	2	713				869	869	869	C4_00097	GR8_01189	HM-7_02252	MTCC-B6033_00202	SH-B11_00203	TUAT1_00207
gloC_2		Hydroxyacylglutathione hydrolase GloC	6	6	1	2	3339				638	638	638	C4_02148	GR8_03245	HM-7_00523	MTCC-B6033_02333	SH-B11_02345	TUAT1_02275
group_410		hypothetical protein	6	6	1	2	1555				644	644	644	C4_00809	GR8_01901	HM-7_03121	MTCC-B6033_00928	SH-B11_00962	TUAT1_00941
hemH		Ferrochelatase	6	6	1	2	1649				923	923	923	C4_00898	GR8_01991	HM-7_03210	MTCC-B6033_01015	SH-B11_01049	TUAT1_01030
gdpP		Cyclic-di-AMP phosphodiesterase GdpP	6	6	1	2	3877				1979	1979	1979	C4_03643	GR8_00958	HM-7_02019	MTCC-B6033_03862	SH-B11_03938	TUAT1_03823
yneB		Resolvase YneB	6	6	1	2	2565				647	647	647	C4_01627	GR8_02723	HM-7_03943	MTCC-B6033_01810	SH-B11_01823	TUAT1_01758
yceD_1		General stress protein 16U	6	6	1	2	875				581	581	581	C4_00227	GR8_01320	HM-7_02386	MTCC-B6033_00331	SH-B11_00329	TUAT1_00344
fapR		Transcription factor FapR	6	6	1	2	2350				566	566	566	C4_01433	GR8_02522	HM-7_03746	MTCC-B6033_01613	SH-B11_01630	TUAT1_01560
pqqD		Coenzyme PQQ synthesis protein D	6	6	1	2	1534				905	905	905	C4_00789	GR8_01881	HM-7_03101	MTCC-B6033_00908	SH-B11_00942	TUAT1_00921
group_4106		Putative multidrug export ATP-binding/permease protein	6	6	1	2	1450				1715	1715	1715	C4_00702	GR8_01792	HM-7_03013	MTCC-B6033_00822	SH-B11_00852	TUAT1_00830
era		GTPase Era	6	6	1	2	3394				905	905	905	C4_02200	GR8_03297	HM-7_00575	MTCC-B6033_02385	SH-B11_02397	TUAT1_02327
mtnX		2-hydroxy-3-keto-5-methylthiopentenyl-1-phosphate phosphatase	6	6	1	2	2053				695	695	695	C4_01197	GR8_02287	HM-7_03511	MTCC-B6033_01376	SH-B11_01346	TUAT1_01325
ku		Non-homologous end joining protein Ku	6	6	1	2	2540				848	848	848	C4_01605	GR8_02700	HM-7_03920	MTCC-B6033_01788	SH-B11_01800	TUAT1_01735
yhcR		Endonuclease YhcR	6	6	1	2	1557				2906	2906	2906	C4_00811	GR8_01903	HM-7_03123	MTCC-B6033_00930	SH-B11_00964	TUAT1_00943
ssuC_2		Putative aliphatic sulfonates transport permease protein SsuC	6	6	1	2	5018				794	794	794	C4_02643	GR8_03740	HM-7_01025	MTCC-B6033_02836	SH-B11_02913	TUAT1_02827
ccpA_2		Catabolite control protein A	6	6	1	2	5101				1001	1001	1001	C4_02565	GR8_03664	HM-7_00948	MTCC-B6033_02757	SH-B11_02835	TUAT1_02750
ftsX		Cell division protein FtsX	6	6	1	2	4503				890	890	890	C4_03107	GR8_00430	HM-7_01501	MTCC-B6033_03317	SH-B11_03383	TUAT1_03302
group_4113		Nucleotidase	6	6	1	2	3371				578	578	578	C4_02177	GR8_03274	HM-7_00552	MTCC-B6033_02362	SH-B11_02374	TUAT1_02304
group_4114		hypothetical protein	6	6	1	2	2329				875	875	875	C4_01412	GR8_02501	HM-7_03725	MTCC-B6033_01592	SH-B11_01609	TUAT1_01539
galE		UDP-glucose 4-epimerase	6	6	1	2	4161				992	992	992	C4_03395	GR8_00720	HM-7_01783	MTCC-B6033_03604	SH-B11_03683	TUAT1_03590
dacA		D-alanyl-D-alanine carboxypeptidase DacA	6	6	1	2	3837				1325	1325	1325	C4_03684	GR8_01003	HM-7_02065	MTCC-B6033_00015	SH-B11_00015	TUAT1_00015
group_4117		hypothetical protein	6	6	1	2	3173				353	353	353	C4_01996	GR8_03093	HM-7_00370	MTCC-B6033_02180	SH-B11_02190	TUAT1_02123
divIC		Cell division protein DivIC	6	6	1	2	3782				374	374	374	C4_03739	GR8_01063	HM-7_02125	MTCC-B6033_00076	SH-B11_00077	TUAT1_00075
dapA_2		4-hydroxy-tetrahydrodipicolinate synthase	6	6	1	2	2446				866	866	866	C4_01527	GR8_02616	HM-7_03840	MTCC-B6033_01708	SH-B11_01724	TUAT1_01654
group_412		hypothetical protein	6	6	1	2	1558				566	566	566	C4_00812	GR8_01904	HM-7_03124	MTCC-B6033_00931	SH-B11_00965	TUAT1_00944
lon1		Lon protease 1	6	6	1	2	5329				2324	2324	2324	C4_02411	GR8_03505	HM-7_00794	MTCC-B6033_02597	SH-B11_02672	TUAT1_02542
opuBB		Choline transport system permease protein OpuBB	6	6	1	2	3867				1517	1517	1517	C4_03653	GR8_00968	HM-7_02029	MTCC-B6033_03872	SH-B11_03948	TUAT1_03833
oppD_4		Oligopeptide transport ATP-binding protein OppD	6	6	1	2	1986				1013	1013	1013	C4_01137	GR8_02226	HM-7_03451	MTCC-B6033_01314	SH-B11_01284	TUAT1_01264
gph		Phosphoglycolate phosphatase	6	6	1	2	3438				530	530	530	C4_02240	GR8_03337	HM-7_00615	MTCC-B6033_02425	SH-B11_02438	TUAT1_02367
mdtG_2		Purine efflux pump PbuE	6	6	1	2	4369				1187	1187	1187	C4_03223	GR8_00546	HM-7_01618	MTCC-B6033_03437	SH-B11_03504	TUAT1_03418
group_4125		hypothetical protein	6	6	1	2	1394				800	800	800	C4_00664	GR8_01752	HM-7_02974	MTCC-B6033_00776	SH-B11_00813	TUAT1_00794
group_4126		putative AAA domain-containing protein	6	6	1	2	5401				1265	1265	1265	C4_02341	GR8_03438	HM-7_00724	MTCC-B6033_02530	SH-B11_02602	TUAT1_02475
group_4127		hypothetical protein	6	6	1	2	1533				1460	1469	1467	C4_00788	GR8_01880	HM-7_03100	MTCC-B6033_00907	SH-B11_00941	TUAT1_00920
yvgO_2		Stress response protein YvgO	6	6	1	2	4922				473	473	473	C4_02740	GR8_00056	HM-7_01132	MTCC-B6033_02947	SH-B11_03024	TUAT1_02934
spo0F		Sporulation initiation phosphotransferase F	6	6	1	2	4307				374	374	374	C4_03285	GR8_00608	HM-7_01680	MTCC-B6033_03493	SH-B11_03560	TUAT1_03480
group_413		hypothetical protein	6	6	1	2	1563				416	416	416	C4_00817	GR8_01909	HM-7_03129	MTCC-B6033_00936	SH-B11_00970	TUAT1_00949
speA_2		Arginine decarboxylase	6	6	1	2	2215				1490	1490	1490	C4_01304	GR8_02393	HM-7_03617	MTCC-B6033_01484	SH-B11_01501	TUAT1_01432
dpaB		Dipicolinate synthase subunit B	6	6	1	2	2443				593	593	593	C4_01524	GR8_02613	HM-7_03837	MTCC-B6033_01705	SH-B11_01721	TUAT1_01651
tagO		putative undecaprenyl-phosphate N-acetylglucosaminyl 1-phosphate transferase	6	6	1	2	4471				1067	1067	1067	C4_03138	GR8_00461	HM-7_01532	MTCC-B6033_03348	SH-B11_03414	TUAT1_03333
group_4133		hypothetical protein	6	6	1	2	2346				1673	1673	1673	C4_01429	GR8_02518	HM-7_03742	MTCC-B6033_01609	SH-B11_01626	TUAT1_01556
ribD_2		Riboflavin biosynthesis protein RibD	6	6	1	2	4092				1091	1091	1091	C4_03461	GR8_00783	HM-7_01846	MTCC-B6033_03667	SH-B11_03752	TUAT1_03653
prmA		Ribosomal protein L11 methyltransferase	6	6	1	2	3412				935	935	935	C4_02216	GR8_03313	HM-7_00591	MTCC-B6033_02401	SH-B11_02414	TUAT1_02343
glyQ		Glycine--tRNA ligase alpha subunit	6	6	1	2	3391				887	887	887	C4_02197	GR8_03294	HM-7_00572	MTCC-B6033_02382	SH-B11_02394	TUAT1_02324
gmuD_1		6-phospho-beta-glucosidase GmuD	6	6	1	2	3239				1406	1406	1406	C4_02056	GR8_03154	HM-7_00431	MTCC-B6033_02243	SH-B11_02254	TUAT1_02184
araQ_3		L-arabinose transport system permease protein AraQ	6	6	1	2	4429				821	821	821	C4_03166	GR8_00489	HM-7_01561	MTCC-B6033_03380	SH-B11_03446	TUAT1_03361
group_4139		hypothetical protein	6	6	1	2	4525				1091	1091	1091	C4_03085	GR8_00408	HM-7_01479	MTCC-B6033_03295	SH-B11_03361	TUAT1_03280
liaS_1		Sensor histidine kinase LiaS	6	6	1	2	1573				1145	1145	1145	C4_00827	GR8_01919	HM-7_03139	MTCC-B6033_00946	SH-B11_00980	TUAT1_00959
group_4140		hypothetical protein	6	6	1	2	3189				416	416	416	C4_02012	GR8_03109	HM-7_00386	MTCC-B6033_02196	SH-B11_02206	TUAT1_02139
ywlC		Threonylcarbamoyl-AMP synthase	6	6	1	2	4323				1052	1052	1052	C4_03269	GR8_00592	HM-7_01664	MTCC-B6033_03477	SH-B11_03544	TUAT1_03464
prsA		Foldase protein PrsA	6	6	1	2	1631				875	875	875	C4_00880	GR8_01973	HM-7_03192	MTCC-B6033_00997	SH-B11_01031	TUAT1_01011
proC_4		Pyrroline-5-carboxylate reductase	6	6	1	2	3429				848	848	848	C4_02232	GR8_03329	HM-7_00607	MTCC-B6033_02417	SH-B11_02430	TUAT1_02359
fruA_3		PTS system fructose-specific EIIABC component	6	6	1	2	2192				1892	1895	1893	C4_01281	GR8_02369	HM-7_03594	MTCC-B6033_01460	SH-B11_01478	TUAT1_01409
rsbRD_2		RsbT co-antagonist protein RsbRD	6	6	1	2	3336				869	872	870	C4_02144	GR8_03241	HM-7_00519	MTCC-B6033_02329	SH-B11_02341	TUAT1_02271
aspA_2		Aspartate ammonia-lyase	6	6	1	2	4076				1421	1421	1421	C4_03475	GR8_00798	HM-7_01860	MTCC-B6033_03681	SH-B11_03766	TUAT1_03667
dppB_2		Dipeptide transport system permease protein DppB	6	6	1	2	1984				935	935	935	C4_01135	GR8_02224	HM-7_03449	MTCC-B6033_01312	SH-B11_01282	TUAT1_01262
lutA_3		Lactate utilization protein A	6	6	1	2	4287				2111	2111	2111	C4_03295	GR8_00618	HM-7_01690	MTCC-B6033_03503	SH-B11_03576	TUAT1_03490
group_4149		hypothetical protein	6	6	1	2	1968				446	446	446	C4_01120	GR8_02209	HM-7_03434	MTCC-B6033_01297	SH-B11_01267	TUAT1_01247
tipA		HTH-type transcriptional activator TipA	6	6	1	2	1589				440	440	440	C4_00843	GR8_01935	HM-7_03155	MTCC-B6033_00962	SH-B11_00995	TUAT1_00975
recX		Regulatory protein RecX	6	6	1	2	1470				791	791	791	C4_00719	GR8_01809	HM-7_03030	MTCC-B6033_00839	SH-B11_00869	TUAT1_00847
capA		Capsule biosynthesis protein CapA	6	6	1	2	4408				1169	1169	1169	C4_03187	GR8_00510	HM-7_01582	MTCC-B6033_03401	SH-B11_03467	TUAT1_03382
xynD		Arabinoxylan arabinofuranohydrolase	6	6	1	2	2628				1544	1544	1544	C4_01684	GR8_02778	HM-7_04001	MTCC-B6033_01865	SH-B11_01876	TUAT1_01810
group_4153		hypothetical protein	6	6	1	2	3126				725	725	725	C4_01950	GR8_03048	HM-7_00324	MTCC-B6033_02135	SH-B11_02145	TUAT1_02077
spoIISA		Stage II sporulation protein SA	6	6	1	2	1956				770	770	770	C4_01108	GR8_02197	HM-7_03422	MTCC-B6033_01285	SH-B11_01255	TUAT1_01235
cynR_1		HTH-type transcriptional regulator CynR	6	6	1	2	1914				890	890	890	C4_01086	GR8_02176	HM-7_03400	MTCC-B6033_01260	SH-B11_01234	TUAT1_01213
group_4156		Aspartate racemase	6	6	1	2	1911				698	698	698	C4_01083	GR8_02173	HM-7_03397	MTCC-B6033_01257	SH-B11_01231	TUAT1_01210
group_4157		hypothetical protein	6	6	1	2	3095				335	335	335	C4_01919	GR8_03017	HM-7_00293	MTCC-B6033_02104	SH-B11_02114	TUAT1_02046
yitU		5-amino-6-(5-phospho-D-ribitylamino)uracil phosphatase YitU	6	6	1	2	1770				812	812	812	C4_00981	GR8_02074	HM-7_03294	MTCC-B6033_01156	SH-B11_01133	TUAT1_01113
flhA		Flagellar biosynthesis protein FlhA	6	6	1	2	2402				2033	2033	2033	C4_01484	GR8_02573	HM-7_03797	MTCC-B6033_01664	SH-B11_01681	TUAT1_01611
crcB_1		Putative fluoride ion transporter CrcB	6	6	1	2	1592				365	365	365	C4_00846	GR8_01938	HM-7_03158	MTCC-B6033_00965	SH-B11_00998	TUAT1_00978
phoP		Alkaline phosphatase synthesis transcriptional regulatory protein PhoP	6	6	1	2	5180				728	728	728	C4_02494	GR8_03592	HM-7_00878	MTCC-B6033_02687	SH-B11_02763	TUAT1_02681
cheC		CheY-P phosphatase CheC	6	6	1	2	2408				626	626	626	C4_01490	GR8_02579	HM-7_03803	MTCC-B6033_01670	SH-B11_01687	TUAT1_01617
lexA		LexA repressor	6	6	1	2	2563				620	620	620	C4_01625	GR8_02721	HM-7_03941	MTCC-B6033_01808	SH-B11_01821	TUAT1_01756
rsfS		Ribosomal silencing factor RsfS	6	6	1	2	3431				356	356	356	C4_02234	GR8_03331	HM-7_00609	MTCC-B6033_02419	SH-B11_02432	TUAT1_02361
yigZ		IMPACT family member YigZ	6	6	1	2	4473				668	668	668	C4_03136	GR8_00459	HM-7_01530	MTCC-B6033_03346	SH-B11_03412	TUAT1_03331
pdp		Pyrimidine-nucleoside phosphorylase	6	6	1	2	4035				1301	1301	1301	C4_03514	GR8_00836	HM-7_01896	MTCC-B6033_03722	SH-B11_03805	TUAT1_03703
group_4166		hypothetical protein	6	6	1	2	1724				446	446	446	C4_00935	GR8_02028	HM-7_03248	MTCC-B6033_01110	SH-B11_01087	TUAT1_01067
pepA		Cytosol aminopeptidase	6	6	1	2	4833				1490	1490	1490	C4_02822	GR8_00138	HM-7_01214	MTCC-B6033_03031	SH-B11_03107	TUAT1_03016
murG_1		UDP-N-acetylglucosamine--N-acetylmuramyl-(pentapeptide) pyrophosphoryl-undecaprenol N-acetylglucosamine transferase	6	6	1	2	2279				1094	1094	1094	C4_01363	GR8_02452	HM-7_03676	MTCC-B6033_01543	SH-B11_01560	TUAT1_01490
glnR		HTH-type transcriptional regulator GlnR	6	6	1	2	2506				410	410	410	C4_01584	GR8_02673	HM-7_03896	MTCC-B6033_01765	SH-B11_01783	TUAT1_01711
group_417		hypothetical protein	6	6	1	2	1608				116	116	116	C4_00859	GR8_01952	HM-7_03171	MTCC-B6033_00976	SH-B11_01010	TUAT1_00990
smtB		Succinyl-CoA--L-malate CoA-transferase beta subunit	6	6	1	2	916				1202	1202	1202	C4_00261	GR8_01356	HM-7_02425	MTCC-B6033_00365	SH-B11_00363	TUAT1_00378
deoC		Deoxyribose-phosphate aldolase	6	6	1	2	4032				671	671	671	C4_03516	GR8_00838	HM-7_01898	MTCC-B6033_03724	SH-B11_03807	TUAT1_03705
dinB_1		DNA polymerase IV	6	6	1	2	3217				1232	1232	1232	C4_02039	GR8_03137	HM-7_00414	MTCC-B6033_02224	SH-B11_02234	TUAT1_02167
rsmI		Ribosomal RNA small subunit methyltransferase I	6	6	1	2	3808				881	881	881	C4_03713	GR8_01037	HM-7_02099	MTCC-B6033_00049	SH-B11_00051	TUAT1_00049
lytB_2		Amidase enhancer	6	6	1	2	4343				1022	1022	1022	C4_03249	GR8_00572	HM-7_01644	MTCC-B6033_03457	SH-B11_03524	TUAT1_03444
khtT_1		K(+)/H(+) antiporter subunit KhtT	6	6	1	2	1622				497	497	497	C4_00872	GR8_01965	HM-7_03184	MTCC-B6033_00989	SH-B11_01023	TUAT1_01003
yteP		putative multiple-sugar transport system permease YteP	6	6	1	2	5059				965	965	965	C4_02604	GR8_03703	HM-7_00987	MTCC-B6033_02798	SH-B11_02874	TUAT1_02789
tuaD		UDP-glucose 6-dehydrogenase TuaD	6	6	1	2	4465				1337	1337	1337	C4_03144	GR8_00467	HM-7_01538	MTCC-B6033_03354	SH-B11_03420	TUAT1_03339
yesS		HTH-type transcriptional regulator YesS	6	6	1	2	5058				2300	2300	2300	C4_02605	GR8_03704	HM-7_00988	MTCC-B6033_02799	SH-B11_02875	TUAT1_02790
spmA		Spore maturation protein A	6	6	1	2	3165				587	587	587	C4_01989	GR8_03086	HM-7_00363	MTCC-B6033_02173	SH-B11_02183	TUAT1_02116
lrp_1		Leucine-rich protein	6	6	1	2	1611				875	875	875	C4_00862	GR8_01955	HM-7_03174	MTCC-B6033_00979	SH-B11_01013	TUAT1_00993
liaS_2		Sensor histidine kinase LiaS	6	6	1	2	4717				1064	1064	1064	C4_02915	GR8_00233	HM-7_01309	MTCC-B6033_03127	SH-B11_03200	TUAT1_03115
pbpF		Penicillin-binding protein 1F	6	6	1	2	1647				2135	2135	2135	C4_00896	GR8_01989	HM-7_03208	MTCC-B6033_01013	SH-B11_01047	TUAT1_01028
yceD_2		General stress protein 16U	6	6	1	2	876				578	578	578	C4_00228	GR8_01321	HM-7_02387	MTCC-B6033_00332	SH-B11_00330	TUAT1_00345
rplI		50S ribosomal protein L9	6	6	1	2	3878				449	449	449	C4_03642	GR8_00957	HM-7_02018	MTCC-B6033_03861	SH-B11_03937	TUAT1_03822
group_4184		hypothetical protein	6	6	1	2	2571				482	482	482	C4_01633	GR8_02729	HM-7_03949	MTCC-B6033_01816	SH-B11_01829	TUAT1_01764
group_4185		hypothetical protein	6	6	1	2	3301				527	527	527	C4_02118	GR8_03215	HM-7_00493	MTCC-B6033_02303	SH-B11_02315	TUAT1_02245
fadA		3-ketoacyl-CoA thiolase	6	6	1	2	4742				1175	1175	1175	C4_02893	GR8_00212	HM-7_01287	MTCC-B6033_03105	SH-B11_03179	TUAT1_03094
pstA		Phosphate transport system permease protein PstA	6	6	1	2	3359				884	884	884	C4_02165	GR8_03262	HM-7_00540	MTCC-B6033_02350	SH-B11_02362	TUAT1_02292
pbpH_2		Penicillin-binding protein H	6	6	1	2	3362				2135	2135	2135	C4_02168	GR8_03265	HM-7_00543	MTCC-B6033_02353	SH-B11_02365	TUAT1_02295
epsL		putative sugar transferase EpsL	6	6	1	2	4602				593	593	593	C4_03020	GR8_00337	HM-7_01413	MTCC-B6033_03230	SH-B11_03295	TUAT1_03219
glnQ_2		Glutamine transport ATP-binding protein GlnQ	6	6	1	2	4364				740	740	740	C4_03228	GR8_00551	HM-7_01623	MTCC-B6033_03442	SH-B11_03509	TUAT1_03423
merR1_2		Mercuric resistance operon regulatory protein	6	6	1	2	4022				359	359	359	C4_03525	GR8_00847	HM-7_01907	MTCC-B6033_03733	SH-B11_03816	TUAT1_03714
citZ		Citrate synthase 2	6	6	1	2	5177				1118	1118	1118	C4_02497	GR8_03595	HM-7_00881	MTCC-B6033_02690	SH-B11_02766	TUAT1_02684
coxA		Sporulation cortex protein CoxA	6	6	1	2	5369				620	620	620	C4_02370	GR8_03467	HM-7_00753	MTCC-B6033_02559	SH-B11_02631	TUAT1_02504
mprF		Phosphatidylglycerol lysyltransferase	6	6	1	2	1462				2570	2570	2570	C4_00711	GR8_01801	HM-7_03022	MTCC-B6033_00831	SH-B11_00861	TUAT1_00839
yacL		putative PIN and TRAM-domain containing protein YacL	6	6	1	2	3755				1124	1124	1124	C4_00007	GR8_01107	HM-7_02169	MTCC-B6033_00120	SH-B11_00121	TUAT1_00119
menC		o-succinylbenzoate synthase	6	6	1	2	4999				1124	1124	1124	C4_02662	GR8_03759	HM-7_01044	MTCC-B6033_02855	SH-B11_02932	TUAT1_02846
sorC		Sorbitol operon regulator	6	6	1	2	2291				938	938	938	C4_01375	GR8_02464	HM-7_03688	MTCC-B6033_01555	SH-B11_01572	TUAT1_01502
bcr		Bicyclomycin resistance protein	6	6	1	2	842				1217	1217	1217	C4_00195	GR8_01286	HM-7_02353	MTCC-B6033_00298	SH-B11_00296	TUAT1_00310
ctc		General stress protein CTC	6	6	1	2	3792				626	626	626	C4_03729	GR8_01053	HM-7_02115	MTCC-B6033_00065	SH-B11_00067	TUAT1_00065
iucD_1		L-lysine N6-monooxygenase	6	6	1	2	1620				1271	1271	1271	C4_00870	GR8_01963	HM-7_03182	MTCC-B6033_00987	SH-B11_01021	TUAT1_01001
queE_2		7-carboxy-7-deazaguanine synthase	6	6	1	2	2066				731	731	731	C4_01210	GR8_02300	HM-7_03524	MTCC-B6033_01389	SH-B11_01359	TUAT1_01338
group_4201		hypothetical protein	6	6	1	2	3097				806	806	806	C4_01921	GR8_03019	HM-7_00295	MTCC-B6033_02106	SH-B11_02116	TUAT1_02048
group_4202		hypothetical protein	6	6	1	2	1607				617	617	617	C4_00858	GR8_01951	HM-7_03170	MTCC-B6033_00975	SH-B11_01009	TUAT1_00989
gatB_1		Aspartyl/glutamyl-tRNA(Asn/Gln) amidotransferase subunit B	6	6	1	2	1279				1430	1430	1430	C4_00568	GR8_01662	HM-7_02883	MTCC-B6033_00682	SH-B11_00721	TUAT1_00702
mcsB		Protein-arginine kinase	6	6	1	2	3759				1091	1091	1091	C4_00003	GR8_01103	HM-7_02165	MTCC-B6033_00116	SH-B11_00117	TUAT1_00115
flgK		Flagellar hook-associated protein 1	6	6	1	2	4483				1520	1520	1520	C4_03126	GR8_00449	HM-7_01520	MTCC-B6033_03336	SH-B11_03402	TUAT1_03321
dhmA2		Haloalkane dehalogenase 2	6	6	1	2	4893				824	824	824	C4_02767	GR8_00083	HM-7_01159	MTCC-B6033_02976	SH-B11_03051	TUAT1_02961
gltA_2		Glutamate synthase [NADPH] large chain	6	6	1	2	2705				4571	4571	4571	C4_01755	GR8_02851	HM-7_04071	MTCC-B6033_01938	SH-B11_01946	TUAT1_01877
ctaA		Heme A synthase	6	6	1	2	2242				923	923	923	C4_01326	GR8_02415	HM-7_03639	MTCC-B6033_01506	SH-B11_01523	TUAT1_01454
ymfD		Bacillibactin exporter	6	6	1	2	2452				1229	1229	1229	C4_01533	GR8_02622	HM-7_03846	MTCC-B6033_01714	SH-B11_01730	TUAT1_01660
fabM		Trans-2-decenoyl-[acyl-carrier-protein] isomerase	6	6	1	2	1625				767	815	807	C4_00874	GR8_01967	HM-7_03186	MTCC-B6033_00991	SH-B11_01025	TUAT1_01005
arsB_1		Arsenical pump membrane protein	6	6	1	2	933				1298	1298	1298	C4_00278	GR8_01370	HM-7_02439	MTCC-B6033_00379	SH-B11_00380	TUAT1_00395
dnaJ		Chaperone protein DnaJ	6	6	1	2	3413				1133	1133	1133	C4_02217	GR8_03314	HM-7_00592	MTCC-B6033_02402	SH-B11_02415	TUAT1_02344
cheV		Chemotaxis protein CheV	6	6	1	2	2095				908	908	908	C4_01239	GR8_02329	HM-7_03552	MTCC-B6033_01417	SH-B11_01387	TUAT1_01367
murD		UDP-N-acetylmuramoylalanine--D-glutamate ligase	6	6	1	2	2277				1340	1340	1340	C4_01361	GR8_02450	HM-7_03674	MTCC-B6033_01541	SH-B11_01558	TUAT1_01488
nagB		Glucosamine-6-phosphate deaminase 1	6	6	1	2	4530				725	725	725	C4_03080	GR8_00403	HM-7_01474	MTCC-B6033_03290	SH-B11_03356	TUAT1_03275
cssS		Sensor histidine kinase CssS	6	6	1	2	4730				1331	1331	1331	C4_02904	GR8_00223	HM-7_01298	MTCC-B6033_03116	SH-B11_03190	TUAT1_03105
capB		Capsule biosynthesis protein CapB	6	6	1	2	4406				1181	1181	1181	C4_03189	GR8_00512	HM-7_01584	MTCC-B6033_03403	SH-B11_03469	TUAT1_03384
spoIIIE		DNA translocase SpoIIIE	6	6	1	2	2450				2489	2489	2489	C4_01531	GR8_02620	HM-7_03844	MTCC-B6033_01712	SH-B11_01728	TUAT1_01658
opuCB		Glycine betaine/carnitine/choline transport system permease protein OpuCB	6	6	1	2	4637				653	653	653	C4_02989	GR8_00306	HM-7_01382	MTCC-B6033_03199	SH-B11_03264	TUAT1_03188
mrpD		Na(+)/H(+) antiporter subunit D	6	6	1	2	4868				1478	1478	1478	C4_02789	GR8_00105	HM-7_01181	MTCC-B6033_02998	SH-B11_03074	TUAT1_02983
yhaO		putative metallophosphoesterase YhaO	6	6	1	2	1627				1214	1214	1214	C4_00876	GR8_01969	HM-7_03188	MTCC-B6033_00993	SH-B11_01027	TUAT1_01007
group_4220		hypothetical protein	6	6	1	2	4380				356	356	356	C4_03212	GR8_00535	HM-7_01607	MTCC-B6033_03426	SH-B11_03492	TUAT1_03407
ydgH_1		Putative membrane protein YdgH	6	6	1	2	2453				3116	3116	3116	C4_01534	GR8_02623	HM-7_03847	MTCC-B6033_01715	SH-B11_01731	TUAT1_01661
hisI		Phosphoribosyl-AMP cyclohydrolase	6	6	1	2	4548				629	629	629	C4_03062	GR8_00384	HM-7_01456	MTCC-B6033_03273	SH-B11_03339	TUAT1_03257
yabJ_2		2-iminobutanoate/2-iminopropanoate deaminase	6	6	1	2	2609				374	374	374	C4_01669	GR8_02762	HM-7_03986	MTCC-B6033_01849	SH-B11_01863	TUAT1_01798
licH_1		putative 6-phospho-beta-glucosidase	6	6	1	2	1310				1328	1328	1328	C4_00586	GR8_01676	HM-7_02899	MTCC-B6033_00697	SH-B11_00737	TUAT1_00718
cotA		Spore coat protein A	6	6	1	2	1209				1529	1529	1529	C4_00511	GR8_01605	HM-7_02821	MTCC-B6033_00619	SH-B11_00632	TUAT1_00636
group_4226		hypothetical protein	6	6	1	2	2153				1277	1277	1277	C4_01245	GR8_02333	HM-7_03558	MTCC-B6033_01423	SH-B11_01442	TUAT1_01373
isp		Major intracellular serine protease	6	6	1	2	2013				959	959	959	C4_01162	GR8_02252	HM-7_03477	MTCC-B6033_01341	SH-B11_01310	TUAT1_01290
yvbW		putative amino acid permease YvbW	6	6	1	2	4511				1349	1349	1349	C4_03099	GR8_00422	HM-7_01493	MTCC-B6033_03309	SH-B11_03375	TUAT1_03294
uidB		Glucuronide carrier protein	6	6	1	2	2722				1391	1391	1391	C4_01771	GR8_02867	HM-7_04087	MTCC-B6033_01954	SH-B11_01962	TUAT1_01893
group_423		hypothetical protein	6	6	1	2	1643				707	707	707	C4_00892	GR8_01985	HM-7_03204	MTCC-B6033_01009	SH-B11_01043	TUAT1_01023
dcuS_1		Sensor histidine kinase DcuS	6	6	1	2	1060				1619	1619	1619	C4_00390	GR8_01489	HM-7_02554	MTCC-B6033_00488	SH-B11_00501	TUAT1_00515
yocH_1		Cell wall-binding protein YocH	6	6	1	2	3804				1202	1202	1202	C4_03717	GR8_01041	HM-7_02103	MTCC-B6033_00053	SH-B11_00055	TUAT1_00053
ykvU		Sporulation protein YkvU	6	6	1	2	2073				1316	1316	1316	C4_01216	GR8_02307	HM-7_03530	MTCC-B6033_01395	SH-B11_01365	TUAT1_01345
tyrA		Prephenate dehydrogenase	6	6	1	2	3106				1115	1115	1115	C4_01930	GR8_03028	HM-7_00304	MTCC-B6033_02115	SH-B11_02125	TUAT1_02057
group_4234		hypothetical protein	6	6	1	2	1786				740	740	740	C4_00996	GR8_02089	HM-7_03309	MTCC-B6033_01171	SH-B11_01148	TUAT1_01128
group_4235		putative cation efflux system protein	6	6	1	2	1211				899	899	899	C4_00513	GR8_01607	HM-7_02823	MTCC-B6033_00621	SH-B11_00634	TUAT1_00638
panS		Pantothenate precursors transporter PanS	6	6	1	2	2753				950	950	950	C4_01800	GR8_02897	HM-7_04117	MTCC-B6033_01984	SH-B11_01992	TUAT1_01924
group_4237		Gluconeogenesis factor	6	6	1	2	4554				959	959	959	C4_03056	GR8_00378	HM-7_01450	MTCC-B6033_03267	SH-B11_03333	TUAT1_03251
group_4238		DegV domain-containing protein	6	6	1	2	4476				842	842	842	C4_03133	GR8_00456	HM-7_01527	MTCC-B6033_03343	SH-B11_03409	TUAT1_03328
fliW		Flagellar assembly factor FliW	6	6	1	2	4486				434	434	434	C4_03123	GR8_00446	HM-7_01517	MTCC-B6033_03333	SH-B11_03399	TUAT1_03318
group_424		hypothetical protein	6	6	1	2	1645				356	356	356	C4_00894	GR8_01987	HM-7_03206	MTCC-B6033_01011	SH-B11_01045	TUAT1_01025
ywtF_2		Putative transcriptional regulator YwtF	6	6	1	2	4412				965	965	965	C4_03183	GR8_00506	HM-7_01578	MTCC-B6033_03397	SH-B11_03463	TUAT1_03378
hepT		Heptaprenyl diphosphate synthase component 2	6	6	1	2	3119				962	962	962	C4_01943	GR8_03041	HM-7_00317	MTCC-B6033_02128	SH-B11_02138	TUAT1_02070
degS		Signal transduction histidine-protein kinase/phosphatase DegS	6	6	1	2	4474				1175	1175	1175	C4_03135	GR8_00458	HM-7_01529	MTCC-B6033_03345	SH-B11_03411	TUAT1_03330
nos		Nitric oxide synthase oxygenase	6	6	1	2	1362				1106	1106	1106	C4_00632	GR8_01723	HM-7_02944	MTCC-B6033_00747	SH-B11_00784	TUAT1_00765
group_4244		hypothetical protein	6	6	1	2	4938				1313	1313	1313	C4_02728	GR8_00044	HM-7_01120	MTCC-B6033_02935	SH-B11_03012	TUAT1_02922
sdhB		L-serine dehydratase, beta chain	6	6	1	2	2347				662	662	662	C4_01430	GR8_02519	HM-7_03743	MTCC-B6033_01610	SH-B11_01627	TUAT1_01557
group_4246		hypothetical protein	6	6	1	2	997				614	614	614	C4_00338	GR8_01432	HM-7_02502	MTCC-B6033_00436	SH-B11_00440	TUAT1_00461
hxlR_2		HTH-type transcriptional activator HxlR	6	6	1	2	5487				350	350	350	C4_02280	GR8_03369	HM-7_00654	MTCC-B6033_02465	SH-B11_02540	TUAT1_02406
moaA		GTP 3',8-cyclase	6	6	1	2	4349				1007	1007	1007	C4_03243	GR8_00566	HM-7_01638	MTCC-B6033_03451	SH-B11_03518	TUAT1_03438
pckA		Phosphoenolpyruvate carboxykinase (ATP)	6	6	1	2	5027				1586	1586	1586	C4_02634	GR8_03731	HM-7_01016	MTCC-B6033_02827	SH-B11_02904	TUAT1_02818
rbn		Ribonuclease BN	6	6	1	2	1656				743	743	743	C4_00905	GR8_01998	HM-7_03217	MTCC-B6033_01022	SH-B11_01057	TUAT1_01037
group_4250		hypothetical protein	6	6	1	2	3072				371	371	371	C4_01897	GR8_02995	HM-7_00271	MTCC-B6033_02082	SH-B11_02092	TUAT1_02024
flgL		Flagellar hook-associated protein 3	6	6	1	2	4484				911	911	911	C4_03125	GR8_00448	HM-7_01519	MTCC-B6033_03335	SH-B11_03401	TUAT1_03320
bioB_1		Biotin synthase	6	6	1	2	5035				965	965	965	C4_02626	GR8_03723	HM-7_01008	MTCC-B6033_02819	SH-B11_02896	TUAT1_02810
group_4253		NADH dehydrogenase-like protein	6	6	1	2	4828				1211	1211	1211	C4_02827	GR8_00143	HM-7_01219	MTCC-B6033_03036	SH-B11_03112	TUAT1_03021
sipW		Signal peptidase I W	6	6	1	2	3316				572	572	572	C4_02133	GR8_03230	HM-7_00508	MTCC-B6033_02318	SH-B11_02330	TUAT1_02260
gcvPB		putative glycine dehydrogenase (decarboxylating) subunit 2	6	6	1	2	3308				1460	1460	1460	C4_02125	GR8_03222	HM-7_00500	MTCC-B6033_02310	SH-B11_02322	TUAT1_02252
mdeA		L-methionine gamma-lyase	6	6	1	2	2505				1280	1280	1280	C4_01583	GR8_02672	HM-7_03895	MTCC-B6033_01764	SH-B11_01782	TUAT1_01710
deoR_1		Deoxyribonucleoside regulator	6	6	1	2	1976				956	956	956	C4_01128	GR8_02217	HM-7_03442	MTCC-B6033_01305	SH-B11_01275	TUAT1_01255
trxB_2		Thioredoxin reductase	6	6	1	2	4551				983	983	983	C4_03059	GR8_00381	HM-7_01453	MTCC-B6033_03270	SH-B11_03336	TUAT1_03254
yfhA_1		putative siderophore transport system permease protein YfhA	6	6	1	2	4786				1037	1037	1037	C4_02863	GR8_00180	HM-7_01256	MTCC-B6033_03073	SH-B11_03150	TUAT1_03060
htpX_1		Protease HtpX	6	6	1	2	1660				1283	1283	1283	C4_00909	GR8_02002	HM-7_03221	MTCC-B6033_01026	SH-B11_01061	TUAT1_01041
metG		Methionine--tRNA ligase	6	6	1	2	3806				2000	2000	2000	C4_03715	GR8_01039	HM-7_02101	MTCC-B6033_00051	SH-B11_00053	TUAT1_00051
leuC		3-isopropylmalate dehydratase large subunit	6	6	1	2	5323				1415	1415	1415	C4_02417	GR8_03511	HM-7_00800	MTCC-B6033_02603	SH-B11_02678	TUAT1_02548
group_4262		hypothetical protein	6	6	1	2	4800				305	305	305	C4_02853	GR8_00170	HM-7_01246	MTCC-B6033_03063	SH-B11_03141	TUAT1_03050
ybbH_2		putative HTH-type transcriptional regulator YbbH	6	6	1	2	4065				860	860	860	C4_03486	GR8_00809	HM-7_01871	MTCC-B6033_03694	SH-B11_03777	TUAT1_03678
betI_2		HTH-type transcriptional regulator BetI	6	6	1	2	4669				608	608	608	C4_02962	GR8_00279	HM-7_01355	MTCC-B6033_03173	SH-B11_03238	TUAT1_03161
cydB		Cytochrome bd-I ubiquinol oxidase subunit 2	6	6	1	2	4109				1016	1016	1016	C4_03446	GR8_00768	HM-7_01831	MTCC-B6033_03652	SH-B11_03737	TUAT1_03638
group_4266		hypothetical protein	6	6	1	2	4749				341	341	341	C4_02886	GR8_00205	HM-7_01280	MTCC-B6033_03098	SH-B11_03172	TUAT1_03087
cydD		ATP-binding/permease protein CydD	6	6	1	2	4110				1736	1736	1736	C4_03445	GR8_00767	HM-7_01830	MTCC-B6033_03651	SH-B11_03736	TUAT1_03637
ywiB		putative beta-barrel protein YwiB	6	6	1	2	4275				422	422	422	C4_03305	GR8_00628	HM-7_01700	MTCC-B6033_03514	SH-B11_03587	TUAT1_03500
ywlF		Putative sugar phosphate isomerase YwlF	6	6	1	2	4326				449	449	449	C4_03266	GR8_00589	HM-7_01661	MTCC-B6033_03474	SH-B11_03541	TUAT1_03461
group_427		hypothetical protein	6	6	1	2	1703				230	236	235	C4_00915	GR8_02008	HM-7_03227	MTCC-B6033_01032	SH-B11_01067	TUAT1_01047
gapB		Glyceraldehyde-3-phosphate dehydrogenase 2	6	6	1	2	5186				1022	1022	1022	C4_02488	GR8_03586	HM-7_00872	MTCC-B6033_02681	SH-B11_02757	TUAT1_02675
yxeO_1		putative amino-acid import ATP-binding protein YxeO	6	6	1	2	978				746	746	746	C4_00319	GR8_01414	HM-7_02483	MTCC-B6033_00418	SH-B11_00421	TUAT1_00442
fliM		Flagellar motor switch protein FliM	6	6	1	2	2394				998	998	998	C4_01476	GR8_02565	HM-7_03789	MTCC-B6033_01656	SH-B11_01673	TUAT1_01603
group_4279		hypothetical protein	6	6	1	2	4947				1346	1346	1346	C4_02720	GR8_00036	HM-7_01112	MTCC-B6033_02926	SH-B11_03004	TUAT1_02914
group_428		hypothetical protein	6	6	1	2	1706				482	482	482	C4_00918	GR8_02011	HM-7_03231	MTCC-B6033_01092	SH-B11_01070	TUAT1_01050
lacC_1		Tagatose-6-phosphate kinase	6	6	1	2	2191				911	911	911	C4_01280	GR8_02368	HM-7_03593	MTCC-B6033_01459	SH-B11_01477	TUAT1_01408
rocR_2		Arginine utilization regulatory protein RocR	6	6	1	2	3269				2072	2072	2072	C4_02086	GR8_03184	HM-7_00461	MTCC-B6033_02272	SH-B11_02284	TUAT1_02214
ythB		Putative cytochrome bd menaquinol oxidase subunit II	6	6	1	2	5002				1052	1052	1052	C4_02659	GR8_03756	HM-7_01041	MTCC-B6033_02852	SH-B11_02929	TUAT1_02843
stp_1		Serine/threonine phosphatase stp	6	6	1	2	2339				770	770	770	C4_01422	GR8_02511	HM-7_03735	MTCC-B6033_01602	SH-B11_01619	TUAT1_01549
rapA_3		Response regulator aspartate phosphatase A	6	6	1	2	3210				1262	1262	1262	C4_02032	GR8_03130	HM-7_00407	MTCC-B6033_02217	SH-B11_02227	TUAT1_02160
group_4285		hypothetical protein	6	6	1	2	3342				1253	1253	1253	C4_02151	GR8_03248	HM-7_00526	MTCC-B6033_02336	SH-B11_02348	TUAT1_02278
pepT_1		Peptidase T	6	6	1	2	3251				1121	1121	1121	C4_02068	GR8_03166	HM-7_00443	MTCC-B6033_02254	SH-B11_02266	TUAT1_02196
engB		putative GTP-binding protein EngB	6	6	1	2	5330				587	587	587	C4_02410	GR8_03504	HM-7_00793	MTCC-B6033_02596	SH-B11_02671	TUAT1_02541
nasA		Nitrate transporter	6	6	1	2	2703				1202	1202	1202	C4_01753	GR8_02849	HM-7_04069	MTCC-B6033_01936	SH-B11_01944	TUAT1_01875
uup		ABC transporter ATP-binding protein uup	6	6	1	2	1336				1892	1892	1892	C4_00609	GR8_01699	HM-7_02921	MTCC-B6033_00720	SH-B11_00760	TUAT1_00742
mdtL		Multidrug resistance protein MdtL	6	6	1	2	1709				1169	1169	1169	C4_00920	GR8_02013	HM-7_03233	MTCC-B6033_01094	SH-B11_01072	TUAT1_01052
nasE		Assimilatory nitrite reductase [NAD(P)H] small subunit	6	6	1	2	2699				323	323	323	C4_01749	GR8_02845	HM-7_04065	MTCC-B6033_01932	SH-B11_01940	TUAT1_01871
gtaB_2		UTP--glucose-1-phosphate uridylyltransferase	6	6	1	2	4451				881	881	881	C4_03155	GR8_00478	HM-7_01550	MTCC-B6033_03365	SH-B11_03431	TUAT1_03350
group_4292		hypothetical protein	6	6	1	2	4003				1676	1676	1676	C4_03539	GR8_00861	HM-7_01921	MTCC-B6033_03751	SH-B11_03830	TUAT1_03728
yabJ_1		2-iminobutanoate/2-iminopropanoate deaminase	6	6	1	2	3796				377	377	377	C4_03725	GR8_01049	HM-7_02111	MTCC-B6033_00061	SH-B11_00063	TUAT1_00061
luxA_2		Alkanal monooxygenase alpha chain	6	6	1	2	1165				1052	1052	1052	C4_00466	GR8_01560	HM-7_02629	MTCC-B6033_00574	SH-B11_00587	TUAT1_00591
ask		Aspartokinase	6	6	1	2	2445				1214	1214	1214	C4_01526	GR8_02615	HM-7_03839	MTCC-B6033_01707	SH-B11_01723	TUAT1_01653
dnaG		DNA primase	6	6	1	2	3386				1829	1829	1829	C4_02192	GR8_03289	HM-7_00567	MTCC-B6033_02377	SH-B11_02389	TUAT1_02319
nusB		N utilization substance protein B	6	6	1	2	3285				392	395	393	C4_02102	GR8_03199	HM-7_00477	MTCC-B6033_02287	SH-B11_02299	TUAT1_02229
group_4298		hypothetical protein	6	6	1	2	2740				506	506	506	C4_01789	GR8_02885	HM-7_04105	MTCC-B6033_01972	SH-B11_01980	TUAT1_01911
uppS		Ditrans,polycis-undecaprenyl-diphosphate synthase ((2E,6E)-farnesyl-diphosphate specific)	6	6	1	2	2416				782	782	782	C4_01498	GR8_02587	HM-7_03811	MTCC-B6033_01678	SH-B11_01695	TUAT1_01625
group_430		Barstar	6	6	1	2	1710				278	278	278	C4_00921	GR8_02014	HM-7_03234	MTCC-B6033_01096	SH-B11_01073	TUAT1_01053
hemA		Glutamyl-tRNA reductase	6	6	1	2	5334				1382	1382	1382	C4_02405	GR8_03502	HM-7_00788	MTCC-B6033_02594	SH-B11_02666	TUAT1_02539
gfo_2		Glucose--fructose oxidoreductase	6	6	1	2	4021				983	992	989	C4_03526	GR8_00848	HM-7_01908	MTCC-B6033_03734	SH-B11_03817	TUAT1_03715
gabR_3		HTH-type transcriptional regulatory protein GabR	6	6	1	2	1707				1439	1439	1439	C4_00919	GR8_02012	HM-7_03232	MTCC-B6033_01093	SH-B11_01071	TUAT1_01051
bglA		Aryl-phospho-beta-D-glucosidase BglA	6	6	1	2	3952				1436	1436	1436	C4_03585	GR8_00903	HM-7_01964	MTCC-B6033_03804	SH-B11_03878	TUAT1_03771
steT		Serine/threonine exchanger SteT	6	6	1	2	1978				1325	1325	1325	C4_01130	GR8_02219	HM-7_03444	MTCC-B6033_01307	SH-B11_01277	TUAT1_01257
group_4305		hypothetical protein	6	6	1	2	1464				467	467	467	C4_00713	GR8_01803	HM-7_03024	MTCC-B6033_00833	SH-B11_00863	TUAT1_00841
benM		HTH-type transcriptional regulator BenM	6	6	1	2	4392				887	887	887	C4_03200	GR8_00523	HM-7_01595	MTCC-B6033_03414	SH-B11_03480	TUAT1_03395
cwlO_1		Peptidoglycan DL-endopeptidase CwlO	6	6	1	2	4550				1373	1376	1374	C4_03060	GR8_00382	HM-7_01454	MTCC-B6033_03271	SH-B11_03337	TUAT1_03255
sleB_1		Spore cortex-lytic enzyme	6	6	1	2	2072				653	659	655	C4_01215	GR8_02306	HM-7_03529	MTCC-B6033_01394	SH-B11_01364	TUAT1_01344
group_4309		hypothetical protein	6	6	1	2	4856				1226	1226	1226	C4_02800	GR8_00116	HM-7_01192	MTCC-B6033_03009	SH-B11_03085	TUAT1_02994
ywtF_1		Putative transcriptional regulator YwtF	6	6	1	2	1715				914	956	921	C4_00926	GR8_02019	HM-7_03239	MTCC-B6033_01101	SH-B11_01078	TUAT1_01058
dxs_1		1-deoxy-D-xylulose-5-phosphate synthase	6	6	1	2	3280				1901	1901	1901	C4_02097	GR8_03194	HM-7_00472	MTCC-B6033_02282	SH-B11_02294	TUAT1_02224
nfo		putative endonuclease 4	6	6	1	2	3378				893	893	893	C4_02184	GR8_03281	HM-7_00559	MTCC-B6033_02369	SH-B11_02381	TUAT1_02311
pglF		UDP-N-acetyl-alpha-D-glucosamine C6 dehydratase	6	6	1	2	4594				1874	1874	1874	C4_03028	GR8_00345	HM-7_01421	MTCC-B6033_03238	SH-B11_03303	TUAT1_03227
rimI		Ribosomal-protein-alanine acetyltransferase	6	6	1	2	1183				428	428	428	C4_00489	GR8_01583	HM-7_02654	MTCC-B6033_00596	SH-B11_00609	TUAT1_00614
fumC		Fumarate hydratase class II	6	6	1	2	4727				1394	1394	1394	C4_02908	GR8_00226	HM-7_01302	MTCC-B6033_03120	SH-B11_03193	TUAT1_03108
gsiC		Glutathione transport system permease protein GsiC	6	6	1	2	1797				950	950	950	C4_01007	GR8_02100	HM-7_03320	MTCC-B6033_01182	SH-B11_01159	TUAT1_01139
opuCC		Glycine betaine/carnitine/choline-binding protein OpuCC	6	6	1	2	4638				917	917	917	C4_02988	GR8_00305	HM-7_01381	MTCC-B6033_03198	SH-B11_03263	TUAT1_03187
ltaS2_1		Lipoteichoic acid synthase 2	6	6	1	2	1375				1982	1982	1982	C4_00644	GR8_01733	HM-7_02955	MTCC-B6033_00757	SH-B11_00795	TUAT1_00775
group_4318		hypothetical protein	6	6	1	2	1063				1022	1022	1022	C4_00393	GR8_01492	HM-7_02557	MTCC-B6033_00491	SH-B11_00504	TUAT1_00518
group_4319		Fatty acid-binding protein	6	6	1	2	1765				857	857	857	C4_00976	GR8_02069	HM-7_03289	MTCC-B6033_01151	SH-B11_01128	TUAT1_01108
group_432		hypothetical protein	6	6	1	2	1716				434	434	434	C4_00927	GR8_02020	HM-7_03240	MTCC-B6033_01102	SH-B11_01079	TUAT1_01059
group_4320		hypothetical protein	6	6	1	2	5093				812	812	812	C4_02573	GR8_03672	HM-7_00956	MTCC-B6033_02767	SH-B11_02843	TUAT1_02758
fadB		putative enoyl-CoA hydratase	6	6	1	2	5221				779	779	779	C4_02456	GR8_03554	HM-7_00840	MTCC-B6033_02648	SH-B11_02722	TUAT1_02643
ywdJ		Putative purine permease YwdJ	6	6	1	2	4190				1307	1310	1309	C4_03370	GR8_00695	HM-7_01757	MTCC-B6033_03579	SH-B11_03655	TUAT1_03565
group_4323		Virulence protein	6	6	1	2	1157				395	395	395	C4_00460	GR8_01554	HM-7_02623	MTCC-B6033_00568	SH-B11_00581	TUAT1_00585
recO		DNA repair protein RecO	6	6	1	2	3392				770	770	770	C4_02198	GR8_03295	HM-7_00573	MTCC-B6033_02383	SH-B11_02395	TUAT1_02325
group_4325		hypothetical protein	6	6	1	2	5098				470	470	470	C4_02568	GR8_03667	HM-7_00951	MTCC-B6033_02762	SH-B11_02838	TUAT1_02753
rpoC		DNA-directed RNA polymerase subunit beta'	6	6	1	2	3737				3599	3599	3599	C4_00025	GR8_01125	HM-7_02187	MTCC-B6033_00138	SH-B11_00139	TUAT1_00137
licC_2		Lichenan permease IIC component	6	6	1	2	4084				1310	1310	1310	C4_03468	GR8_00791	HM-7_01853	MTCC-B6033_03674	SH-B11_03759	TUAT1_03660
metK		S-adenosylmethionine synthase	6	6	1	2	5028				1202	1202	1202	C4_02633	GR8_03730	HM-7_01015	MTCC-B6033_02826	SH-B11_02903	TUAT1_02817
group_4329		hypothetical protein	6	6	1	2	4534				944	944	944	C4_03076	GR8_00399	HM-7_01470	MTCC-B6033_03286	SH-B11_03352	TUAT1_03271
gerPE		putative spore germination protein GerPE	6	6	1	2	1731				434	434	434	C4_00942	GR8_02035	HM-7_03255	MTCC-B6033_01117	SH-B11_01094	TUAT1_01074
bglF_1		PTS system beta-glucoside-specific EIIBCA component	6	6	1	2	817				1859	1859	1859	C4_00175	GR8_01267	HM-7_02333	MTCC-B6033_00276	SH-B11_00277	TUAT1_00291
ytnP		putative quorum-quenching lactonase YtnP	6	6	1	2	5086				848	848	848	C4_02580	GR8_03679	HM-7_00963	MTCC-B6033_02774	SH-B11_02850	TUAT1_02765
bm3R1_2		HTH-type transcriptional repressor Bm3R1	6	6	1	2	2554				581	581	581	C4_01617	GR8_02713	HM-7_03933	MTCC-B6033_01800	SH-B11_01813	TUAT1_01748
group_4333		hypothetical protein	6	6	1	2	3341				314	314	314	C4_02150	GR8_03247	HM-7_00525	MTCC-B6033_02335	SH-B11_02347	TUAT1_02277
qoxC		Quinol oxidase subunit 3	6	6	1	2	4166				617	617	617	C4_03390	GR8_00715	HM-7_01778	MTCC-B6033_03599	SH-B11_03678	TUAT1_03585
asnO		Asparagine synthetase [glutamine-hydrolyzing] 3	6	6	1	2	1742				1844	1844	1844	C4_00953	GR8_02046	HM-7_03266	MTCC-B6033_01128	SH-B11_01105	TUAT1_01085
group_4336		hypothetical protein	6	6	1	2	3407				449	449	449	C4_02211	GR8_03308	HM-7_00586	MTCC-B6033_02396	SH-B11_02409	TUAT1_02338
uppP		Undecaprenyl-diphosphatase	6	6	1	2	4921				833	833	833	C4_02741	GR8_00057	HM-7_01133	MTCC-B6033_02948	SH-B11_03025	TUAT1_02935
styD		Phenylacetaldehyde dehydrogenase	6	6	1	2	2749				1484	1484	1484	C4_01797	GR8_02894	HM-7_04114	MTCC-B6033_01980	SH-B11_01988	TUAT1_01920
parC		DNA topoisomerase 4 subunit A	6	6	1	2	2587				2441	2441	2441	C4_01649	GR8_02745	HM-7_03965	MTCC-B6033_01832	SH-B11_01845	TUAT1_01780
gerPB		putative spore germination protein GerPB	6	6	1	2	1734				233	233	233	C4_00945	GR8_02038	HM-7_03258	MTCC-B6033_01120	SH-B11_01097	TUAT1_01077
ltaS1_1		Lipoteichoic acid synthase 1	6	6	1	2	1519				1943	1943	1943	C4_00777	GR8_01869	HM-7_03089	MTCC-B6033_00900	SH-B11_00929	TUAT1_00909
noc		Nucleoid occlusion protein	6	6	1	2	3853				875	875	875	C4_03667	GR8_00982	HM-7_02043	MTCC-B6033_03886	SH-B11_03962	TUAT1_03847
dat_2		Diaminobutyrate--2-oxoglutarate aminotransferase	6	6	1	2	1751				1346	1346	1346	C4_00962	GR8_02055	HM-7_03275	MTCC-B6033_01137	SH-B11_01114	TUAT1_01094
mdh		Malate dehydrogenase	6	6	1	2	5179				938	938	938	C4_02495	GR8_03593	HM-7_00879	MTCC-B6033_02688	SH-B11_02764	TUAT1_02682
group_4344		hypothetical protein	6	6	1	2	4073				455	455	455	C4_03478	GR8_00801	HM-7_01863	MTCC-B6033_03684	SH-B11_03769	TUAT1_03670
cvfB		Conserved virulence factor B	6	6	1	2	1762				848	848	848	C4_00973	GR8_02066	HM-7_03286	MTCC-B6033_01148	SH-B11_01125	TUAT1_01105
cshA		DEAD-box ATP-dependent RNA helicase CshA	6	6	1	2	1076				1490	1490	1490	C4_00404	GR8_01503	HM-7_02568	MTCC-B6033_00502	SH-B11_00515	TUAT1_00529
group_4347		Putative bifunctional phosphatase/peptidyl-prolyl cis-trans isomerase	6	6	1	2	2206				779	779	779	C4_01295	GR8_02384	HM-7_03608	MTCC-B6033_01475	SH-B11_01492	TUAT1_01423
yycI		Two-component system WalR/WalK regulatory protein YycI	6	6	1	2	3903				863	863	863	C4_03616	GR8_00932	HM-7_01992	MTCC-B6033_03835	SH-B11_03907	TUAT1_03797
efp		Elongation factor P	6	6	1	2	3298				557	557	557	C4_02115	GR8_03212	HM-7_00490	MTCC-B6033_02300	SH-B11_02312	TUAT1_02242
adaA_2		Bifunctional transcriptional activator/DNA repair enzyme AdaA	6	6	1	2	1747				866	914	874	C4_00958	GR8_02051	HM-7_03271	MTCC-B6033_01133	SH-B11_01110	TUAT1_01090
yqiK		Inner membrane protein YqiK	6	6	1	2	4983				1547	1547	1547	C4_02691	GR8_00007	HM-7_01083	MTCC-B6033_02894	SH-B11_02973	TUAT1_02885
cimH		Citrate/malate transporter	6	6	1	2	4873				1337	1337	1337	C4_02784	GR8_00100	HM-7_01176	MTCC-B6033_02993	SH-B11_03068	TUAT1_02978
dnaX_1		DNA polymerase III subunit tau	6	6	1	2	3825				1712	1712	1712	C4_03696	GR8_01015	HM-7_02077	MTCC-B6033_00027	SH-B11_00029	TUAT1_00027
gpx1		Hydroperoxy fatty acid reductase gpx1	6	6	1	2	3035				482	482	482	C4_01863	GR8_02960	HM-7_00237	MTCC-B6033_02048	SH-B11_02056	TUAT1_01987
tkt		Transketolase	6	6	1	2	2567				2003	2003	2003	C4_01629	GR8_02725	HM-7_03945	MTCC-B6033_01812	SH-B11_01825	TUAT1_01760
yjcG		Putative phosphoesterase YjcG	6	6	1	2	1856				515	515	515	C4_01057	GR8_02155	HM-7_03370	MTCC-B6033_01232	SH-B11_01211	TUAT1_01189
ggt		Gamma-glutamyltranspeptidase	6	6	1	2	1960				1754	1754	1754	C4_01112	GR8_02201	HM-7_03426	MTCC-B6033_01289	SH-B11_01259	TUAT1_01239
prpE_1		Bis(5'-nucleosyl)-tetraphosphatase PrpE [asymmetrical]	6	6	1	2	1829				743	743	743	C4_01033	GR8_02131	HM-7_03346	MTCC-B6033_01208	SH-B11_01185	TUAT1_01165
group_4358		hypothetical protein	6	6	1	2	5091				1028	1028	1028	C4_02575	GR8_03674	HM-7_00958	MTCC-B6033_02769	SH-B11_02845	TUAT1_02760
epsI		Putative pyruvyl transferase EpsI	6	6	1	2	4600				1028	1028	1028	C4_03022	GR8_00339	HM-7_01415	MTCC-B6033_03232	SH-B11_03297	TUAT1_03221
cysE_2		Serine acetyltransferase	6	6	1	2	1750				536	548	538	C4_00961	GR8_02054	HM-7_03274	MTCC-B6033_01136	SH-B11_01113	TUAT1_01093
group_4360		TelA-like protein	6	6	1	2	883				1094	1094	1094	C4_00235	GR8_01328	HM-7_02394	MTCC-B6033_00339	SH-B11_00337	TUAT1_00352
tig		Trigger factor	6	6	1	2	5326				1274	1274	1274	C4_02414	GR8_03508	HM-7_00797	MTCC-B6033_02600	SH-B11_02675	TUAT1_02545
xseA		Exodeoxyribonuclease 7 large subunit	6	6	1	2	3283				1358	1358	1358	C4_02100	GR8_03197	HM-7_00475	MTCC-B6033_02285	SH-B11_02297	TUAT1_02227
rnc		Ribonuclease 3	6	6	1	2	2355				743	743	743	C4_01438	GR8_02527	HM-7_03751	MTCC-B6033_01618	SH-B11_01635	TUAT1_01565
pdxK		Pyridoxine kinase	6	6	1	2	4184				809	809	809	C4_03376	GR8_00701	HM-7_01763	MTCC-B6033_03585	SH-B11_03661	TUAT1_03571
nirQ		Denitrification regulatory protein NirQ	6	6	1	2	2758				878	878	878	C4_01804	GR8_02901	HM-7_04121	MTCC-B6033_01989	SH-B11_01996	TUAT1_01928
group_4366		hypothetical protein	6	6	1	2	5051				902	902	902	C4_02612	GR8_03711	HM-7_00995	MTCC-B6033_02806	SH-B11_02882	TUAT1_02797
group_4367		hypothetical protein	6	6	1	2	5148				524	524	524	C4_02524	GR8_03623	HM-7_00908	MTCC-B6033_02718	SH-B11_02794	TUAT1_02712
group_4368		hypothetical protein	6	6	1	2	1950				371	371	371	C4_01102	GR8_02191	HM-7_03416	MTCC-B6033_01279	SH-B11_01249	TUAT1_01228
lacF_2		Lactose transport system permease protein LacF	6	6	1	2	4428				971	971	971	C4_03167	GR8_00490	HM-7_01562	MTCC-B6033_03381	SH-B11_03447	TUAT1_03362
aacA4		Aminoglycoside N(6')-acetyltransferase type 1	6	6	1	2	1754				554	554	554	C4_00965	GR8_02058	HM-7_03278	MTCC-B6033_01140	SH-B11_01117	TUAT1_01097
idnT		High-affinity gluconate transporter	6	6	1	2	4016				1328	1328	1328	C4_03530	GR8_00852	HM-7_01912	MTCC-B6033_03740	SH-B11_03821	TUAT1_03719
csbC_1		putative metabolite transport protein CsbC	6	6	1	2	5499				1340	1340	1340	C4_02269	GR8_03358	HM-7_00643	MTCC-B6033_02453	SH-B11_02529	TUAT1_02395
iucD_2		L-lysine N6-monooxygenase	6	6	1	2	1755				1349	1349	1349	C4_00966	GR8_02059	HM-7_03279	MTCC-B6033_01141	SH-B11_01118	TUAT1_01098
group_4373		hypothetical protein	6	6	1	2	1799				752	752	752	C4_01009	GR8_02107	HM-7_03322	MTCC-B6033_01184	SH-B11_01161	TUAT1_01141
tmpC_2		Membrane lipoprotein TmpC	6	6	1	2	1788				965	965	965	C4_00998	GR8_02091	HM-7_03311	MTCC-B6033_01173	SH-B11_01150	TUAT1_01130
rapA_4		RNA polymerase-associated protein RapA	6	6	1	2	3311				1670	1670	1670	C4_02128	GR8_03225	HM-7_00503	MTCC-B6033_02313	SH-B11_02325	TUAT1_02255
panB		3-methyl-2-oxobutanoate hydroxymethyltransferase	6	6	1	2	3088				839	839	839	C4_01912	GR8_03010	HM-7_00286	MTCC-B6033_02097	SH-B11_02107	TUAT1_02039
nusA		Transcription termination/antitermination protein NusA	6	6	1	2	2427				1115	1115	1115	C4_01509	GR8_02598	HM-7_03822	MTCC-B6033_01690	SH-B11_01706	TUAT1_01636
group_4378		hypothetical protein	6	6	1	2	4949				440	440	440	C4_02718	GR8_00034	HM-7_01110	MTCC-B6033_02924	SH-B11_03002	TUAT1_02912
dppC_2		Dipeptide transport system permease protein DppC	6	6	1	2	1985				962	962	962	C4_01136	GR8_02225	HM-7_03450	MTCC-B6033_01313	SH-B11_01283	TUAT1_01263
argC		N-acetyl-gamma-glutamyl-phosphate reductase	6	6	1	2	1775				1043	1043	1043	C4_00986	GR8_02079	HM-7_03299	MTCC-B6033_01161	SH-B11_01138	TUAT1_01118
xynC		Glucuronoxylanase XynC	6	6	1	2	2627				1262	1262	1262	C4_01683	GR8_02777	HM-7_04000	MTCC-B6033_01864	SH-B11_01875	TUAT1_01809
typA		GTP-binding protein TypA/BipA	6	6	1	2	2231				1838	1838	1838	C4_01315	GR8_02404	HM-7_03628	MTCC-B6033_01495	SH-B11_01512	TUAT1_01443
tlyC_1		Hemolysin C	6	6	1	2	1588				1331	1331	1331	C4_00842	GR8_01934	HM-7_03154	MTCC-B6033_00961	SH-B11_00994	TUAT1_00974
xylB_4		Xylulose kinase	6	6	1	2	4015				1517	1517	1517	C4_03531	GR8_00853	HM-7_01913	MTCC-B6033_03741	SH-B11_03822	TUAT1_03720
rbsB_2		Ribose import binding protein RbsB	6	6	1	2	4130				1118	1118	1118	C4_03426	GR8_00748	HM-7_01811	MTCC-B6033_03632	SH-B11_03717	TUAT1_03618
isdC_3		Iron-regulated surface determinant protein C	6	6	1	2	4096				458	458	458	C4_03457	GR8_00779	HM-7_01842	MTCC-B6033_03663	SH-B11_03748	TUAT1_03649
ppaX		Pyrophosphatase PpaX	6	6	1	2	4535				650	650	650	C4_03075	GR8_00398	HM-7_01469	MTCC-B6033_03285	SH-B11_03351	TUAT1_03270
fdhA		Glutathione-independent formaldehyde dehydrogenase	6	6	1	2	5443				1214	1214	1214	C4_02301	GR8_03399	HM-7_00685	MTCC-B6033_02491	SH-B11_02563	TUAT1_02436
yecS_2		L-cystine transport system permease protein YecS	6	6	1	2	4365				662	662	662	C4_03227	GR8_00550	HM-7_01622	MTCC-B6033_03441	SH-B11_03508	TUAT1_03422
ysdC_1		Putative aminopeptidase YsdC	6	6	1	2	1653				1049	1049	1049	C4_00902	GR8_01995	HM-7_03214	MTCC-B6033_01019	SH-B11_01054	TUAT1_01034
group_439		hypothetical protein	6	6	1	2	1790				233	233	233	C4_01000	GR8_02093	HM-7_03313	MTCC-B6033_01175	SH-B11_01152	TUAT1_01132
rpsB		30S ribosomal protein S2	6	6	1	2	2412				734	734	734	C4_01494	GR8_02583	HM-7_03807	MTCC-B6033_01674	SH-B11_01691	TUAT1_01621
group_4391		hypothetical protein	6	6	1	2	3255				953	953	953	C4_02072	GR8_03170	HM-7_00447	MTCC-B6033_02258	SH-B11_02270	TUAT1_02200
sufB_1		FeS cluster assembly protein SufB	6	6	1	2	4766				1397	1397	1397	C4_02877	GR8_00196	HM-7_01270	MTCC-B6033_03088	SH-B11_03163	TUAT1_03078
cysB		HTH-type transcriptional regulator CysB	6	6	1	2	2163				881	881	881	C4_01255	GR8_02343	HM-7_03568	MTCC-B6033_01433	SH-B11_01452	TUAT1_01383
group_4394		hypothetical protein	6	6	1	2	1580				1415	1415	1415	C4_00834	GR8_01926	HM-7_03146	MTCC-B6033_00953	SH-B11_00987	TUAT1_00966
truB		tRNA pseudouridine synthase B	6	6	1	2	2433				929	929	929	C4_01515	GR8_02604	HM-7_03828	MTCC-B6033_01696	SH-B11_01712	TUAT1_01642
relA		GTP pyrophosphokinase	6	6	1	2	5394				2210	2210	2210	C4_02348	GR8_03445	HM-7_00731	MTCC-B6033_02537	SH-B11_02609	TUAT1_02482
recD2		ATP-dependent RecD-like DNA helicase	6	6	1	2	5407				2384	2384	2384	C4_02336	GR8_03433	HM-7_00719	MTCC-B6033_02525	SH-B11_02597	TUAT1_02470
ispE		4-diphosphocytidyl-2-C-methyl-D-erythritol kinase	6	6	1	2	3798				869	869	869	C4_03723	GR8_01047	HM-7_02109	MTCC-B6033_00059	SH-B11_00061	TUAT1_00059
group_4399		hypothetical protein	6	6	1	2	1389				818	818	818	C4_00658	GR8_01747	HM-7_02969	MTCC-B6033_00771	SH-B11_00809	TUAT1_00789
fabF_2		3-oxoacyl-[acyl-carrier-protein] synthase 2	6	6	1	2	1792				1202	1241	1208	C4_01002	GR8_02095	HM-7_03315	MTCC-B6033_01177	SH-B11_01154	TUAT1_01134
actP		Cation/acetate symporter ActP	6	6	1	2	4150				1538	1538	1538	C4_03407	GR8_00729	HM-7_01792	MTCC-B6033_03613	SH-B11_03695	TUAT1_03599
pucK		Uric acid permease PucK	6	6	1	2	3055				1319	1319	1319	C4_01882	GR8_02979	HM-7_00256	MTCC-B6033_02066	SH-B11_02076	TUAT1_02008
bmr3		Multidrug resistance protein 3	6	6	1	2	2648				1520	1523	1522	C4_01702	GR8_02798	HM-7_04020	MTCC-B6033_01885	SH-B11_01894	TUAT1_01826
ydaF_1		Putative ribosomal N-acetyltransferase YdaF	6	6	1	2	1055				569	569	569	C4_00385	GR8_01484	HM-7_02549	MTCC-B6033_00483	SH-B11_00496	TUAT1_00510
rluB		Ribosomal large subunit pseudouridine synthase B	6	6	1	2	3163				734	734	734	C4_01987	GR8_03084	HM-7_00361	MTCC-B6033_02171	SH-B11_02181	TUAT1_02114
ppiB		Peptidyl-prolyl cis-trans isomerase B	6	6	1	2	3181				437	437	437	C4_02004	GR8_03101	HM-7_00378	MTCC-B6033_02188	SH-B11_02198	TUAT1_02131
group_4406		Deoxyguanosinetriphosphate triphosphohydrolase-like protein	6	6	1	2	4256				1301	1301	1301	C4_03315	GR8_00648	HM-7_01710	MTCC-B6033_03534	SH-B11_03607	TUAT1_03520
yeiL		Regulatory protein YeiL	6	6	1	2	2657				686	686	686	C4_01710	GR8_02806	HM-7_04028	MTCC-B6033_01893	SH-B11_01902	TUAT1_01834
prkC		Serine/threonine-protein kinase PrkC	6	6	1	2	2340				1955	1955	1955	C4_01423	GR8_02512	HM-7_03736	MTCC-B6033_01603	SH-B11_01620	TUAT1_01550
adh2_2		Long-chain-alcohol dehydrogenase 2	6	6	1	2	4898				1163	1163	1163	C4_02762	GR8_00078	HM-7_01154	MTCC-B6033_02971	SH-B11_03046	TUAT1_02956
oppF_2		Oligopeptide transport ATP-binding protein OppF	6	6	1	2	1795				1022	1022	1022	C4_01005	GR8_02098	HM-7_03318	MTCC-B6033_01180	SH-B11_01157	TUAT1_01137
group_4410		hypothetical protein	6	6	1	2	5081				935	935	935	C4_02585	GR8_03684	HM-7_00968	MTCC-B6033_02779	SH-B11_02855	TUAT1_02770
group_4411		hypothetical protein	6	6	1	2	3420				1208	1208	1208	C4_02224	GR8_03321	HM-7_00599	MTCC-B6033_02409	SH-B11_02422	TUAT1_02351
pbuE_5		Purine efflux pump PbuE	6	6	1	2	4213				1232	1232	1232	C4_03348	GR8_00673	HM-7_01735	MTCC-B6033_03557	SH-B11_03633	TUAT1_03543
rnr		Ribonuclease R	6	6	1	2	4647				2339	2339	2339	C4_02979	GR8_00296	HM-7_01372	MTCC-B6033_03189	SH-B11_03254	TUAT1_03178
yfmS_3		Putative sensory transducer protein YfmS	6	6	1	2	4050				839	839	839	C4_03499	GR8_00821	HM-7_01881	MTCC-B6033_03707	SH-B11_03790	TUAT1_03688
cshB		DEAD-box ATP-dependent RNA helicase CshB	6	6	1	2	3379				1319	1319	1319	C4_02185	GR8_03282	HM-7_00560	MTCC-B6033_02370	SH-B11_02382	TUAT1_02312
mutS2		Endonuclease MutS2	6	6	1	2	5216				2360	2360	2360	C4_02461	GR8_03559	HM-7_00845	MTCC-B6033_02653	SH-B11_02727	TUAT1_02648
ccsB		Cytochrome c biogenesis protein CcsB	6	6	1	2	3161				1679	1679	1679	C4_01985	GR8_03082	HM-7_00359	MTCC-B6033_02169	SH-B11_02179	TUAT1_02112
tqsA_1		AI-2 transport protein TqsA	6	6	1	2	5416				1064	1064	1064	C4_02328	GR8_03425	HM-7_00711	MTCC-B6033_02517	SH-B11_02589	TUAT1_02462
oxdD_1		Oxalate decarboxylase OxdD	6	6	1	2	915				380	380	380	C4_00260	GR8_01355	HM-7_02424	MTCC-B6033_00364	SH-B11_00362	TUAT1_00377
thiD		Hydroxymethylpyrimidine/phosphomethylpyrimidine kinase	6	6	1	2	1838				806	806	806	C4_01041	GR8_02139	HM-7_03354	MTCC-B6033_01216	SH-B11_01193	TUAT1_01173
pyrF		Orotidine 5'-phosphate decarboxylase	6	6	1	2	2316				704	704	704	C4_01400	GR8_02489	HM-7_03713	MTCC-B6033_01580	SH-B11_01597	TUAT1_01527
lgt		Prolipoprotein diacylglyceryl transferase	6	6	1	2	4533				824	824	824	C4_03077	GR8_00400	HM-7_01471	MTCC-B6033_03287	SH-B11_03353	TUAT1_03272
yknZ		putative ABC transporter permease YknZ	6	6	1	2	2189				1193	1193	1193	C4_01278	GR8_02366	HM-7_03591	MTCC-B6033_01457	SH-B11_01475	TUAT1_01406
maeA_1		putative NAD-dependent malic enzyme 2	6	6	1	2	5087				1697	1697	1697	C4_02579	GR8_03678	HM-7_00962	MTCC-B6033_02773	SH-B11_02849	TUAT1_02764
rsmH_1		Ribosomal RNA small subunit methyltransferase H	6	6	1	2	2270				932	932	932	C4_01354	GR8_02443	HM-7_03667	MTCC-B6033_01534	SH-B11_01551	TUAT1_01482
uvrB		UvrABC system protein B	6	6	1	2	4521				1985	1985	1985	C4_03089	GR8_00412	HM-7_01483	MTCC-B6033_03299	SH-B11_03365	TUAT1_03284
ycdA_1		putative lipoprotein YcdA	6	6	1	2	861				1040	1040	1040	C4_00213	GR8_01305	HM-7_02371	MTCC-B6033_00317	SH-B11_00315	TUAT1_00329
ptsG		PTS system glucose-specific EIICBA component	6	6	1	2	2079				2099	2099	2099	C4_01222	GR8_02313	HM-7_03536	MTCC-B6033_01401	SH-B11_01371	TUAT1_01351
dpp5_1		Dipeptidyl-peptidase 5	6	6	1	2	5025				794	794	794	C4_02636	GR8_03733	HM-7_01018	MTCC-B6033_02829	SH-B11_02906	TUAT1_02820
group_4429	yycB_2	putative transporter YycB	6	6	1	2	3880				1214	1214	1214	C4_03641	GR8_00956	HM-7_02017	MTCC-B6033_03860	SH-B11_03936	TUAT1_03821
group_4430		putative aminotransferase	6	6	1	2	1258				1364	1364	1364	C4_00548	GR8_01642	HM-7_02863	MTCC-B6033_00662	SH-B11_00686	TUAT1_00682
group_4431		hypothetical protein	6	6	1	2	4147				374	377	375	C4_03410	GR8_00732	HM-7_01795	MTCC-B6033_03616	SH-B11_03701	TUAT1_03602
mcpB_3		Methyl-accepting chemotaxis protein McpB	6	6	1	2	4914				1988	1988	1988	C4_02748	GR8_00064	HM-7_01140	MTCC-B6033_02955	SH-B11_03032	TUAT1_02942
fruA_1		PTS system fructose-specific EIIB'BC component	6	6	1	2	829				1118	1118	1118	C4_00183	GR8_01274	HM-7_02340	MTCC-B6033_00286	SH-B11_00284	TUAT1_00298
putR_1		Proline-responsive transcriptional activator PutR	6	6	1	2	932				1232	1232	1232	C4_00277	GR8_01369	HM-7_02438	MTCC-B6033_00378	SH-B11_00379	TUAT1_00394
katA_2		Catalase	6	6	1	2	3871				1589	1589	1589	C4_03649	GR8_00964	HM-7_02025	MTCC-B6033_03868	SH-B11_03944	TUAT1_03829
serS		Serine--tRNA ligase	6	6	1	2	3832				1274	1274	1274	C4_03688	GR8_01007	HM-7_02069	MTCC-B6033_00019	SH-B11_00020	TUAT1_00019
nhaK		Sodium, potassium, lithium and rubidium/H(+) antiporter	6	6	1	2	4678				2015	2015	2015	C4_02953	GR8_00270	HM-7_01346	MTCC-B6033_03164	SH-B11_03229	TUAT1_03152
group_4438		hypothetical protein	6	6	1	2	2793				320	320	320	C4_01834	GR8_02931	HM-7_04151	MTCC-B6033_02019	SH-B11_02026	TUAT1_01958
nadC		putative nicotinate-nucleotide pyrophosphorylase [carboxylating]	6	6	1	2	5366				863	863	863	C4_02373	GR8_03470	HM-7_00756	MTCC-B6033_02562	SH-B11_02634	TUAT1_02507
mhqO		Putative ring-cleaving dioxygenase MhqO	6	6	1	2	3868				950	950	950	C4_03652	GR8_00967	HM-7_02028	MTCC-B6033_03871	SH-B11_03947	TUAT1_03832
feuC_2		Iron-uptake system permease protein FeuC	6	6	1	2	4690				1022	1022	1022	C4_02941	GR8_00258	HM-7_01334	MTCC-B6033_03152	SH-B11_03217	TUAT1_03140
rplJ		50S ribosomal protein L10	6	6	1	2	3741				500	500	500	C4_00021	GR8_01121	HM-7_02183	MTCC-B6033_00134	SH-B11_00135	TUAT1_00133
misCB		Membrane protein insertase MisCB	6	6	1	2	3249				818	818	818	C4_02066	GR8_03164	HM-7_00441	MTCC-B6033_02252	SH-B11_02264	TUAT1_02194
yybR		putative HTH-type transcriptional regulator YybR	6	6	1	2	4509				365	365	365	C4_03101	GR8_00424	HM-7_01495	MTCC-B6033_03311	SH-B11_03377	TUAT1_03296
pgcA		Phosphoglucomutase	6	6	1	2	1572				1745	1745	1745	C4_00826	GR8_01918	HM-7_03138	MTCC-B6033_00945	SH-B11_00979	TUAT1_00958
ythA		Putative cytochrome bd menaquinol oxidase subunit I	6	6	1	2	5003				1331	1331	1331	C4_02658	GR8_03755	HM-7_01040	MTCC-B6033_02851	SH-B11_02928	TUAT1_02842
fliF		Flagellar M-ring protein	6	6	1	2	2383				1592	1592	1592	C4_01465	GR8_02554	HM-7_03778	MTCC-B6033_01645	SH-B11_01662	TUAT1_01592
group_4448		hypothetical protein	6	6	1	2	4882				557	557	557	C4_02777	GR8_00093	HM-7_01169	MTCC-B6033_02986	SH-B11_03061	TUAT1_02971
pepT_2		Peptidase T	6	6	1	2	4068				1232	1232	1232	C4_03483	GR8_00806	HM-7_01868	MTCC-B6033_03689	SH-B11_03774	TUAT1_03675
xlyA		N-acetylmuramoyl-L-alanine amidase XlyA	6	6	1	2	1953				899	1130	937	C4_01105	GR8_02194	HM-7_03419	MTCC-B6033_01282	SH-B11_01252	TUAT1_01232
map		Methionine aminopeptidase 1	6	6	1	2	3707				746	746	746	C4_00055	GR8_01155	HM-7_02217	MTCC-B6033_00168	SH-B11_00169	TUAT1_00167
thyA2		Thymidylate synthase 2	6	6	1	2	3026				794	794	794	C4_01855	GR8_02952	HM-7_00229	MTCC-B6033_02040	SH-B11_02047	TUAT1_01979
ezrA		Septation ring formation regulator EzrA	6	6	1	2	5118				1703	1703	1703	C4_02546	GR8_03649	HM-7_00933	MTCC-B6033_02742	SH-B11_02820	TUAT1_02735
ftsW_1		putative peptidoglycan glycosyltransferase FtsW	6	6	1	2	2239				1211	1211	1211	C4_01323	GR8_02412	HM-7_03636	MTCC-B6033_01503	SH-B11_01520	TUAT1_01451
spoIIGA		Sporulation sigma-E factor-processing peptidase	6	6	1	2	2288				929	929	929	C4_01372	GR8_02461	HM-7_03685	MTCC-B6033_01552	SH-B11_01569	TUAT1_01499
ycgR		Flagellar brake protein YcgR	6	6	1	2	3138				647	647	647	C4_01963	GR8_03060	HM-7_00336	MTCC-B6033_02147	SH-B11_02157	TUAT1_02090
group_4456		putative acyl-CoA thioester hydrolase	6	6	1	2	1993				521	521	521	C4_01144	GR8_02234	HM-7_03458	MTCC-B6033_01321	SH-B11_01291	TUAT1_01271
dctA		C4-dicarboxylate transport protein	6	6	1	2	1062				1268	1268	1268	C4_00392	GR8_01491	HM-7_02556	MTCC-B6033_00490	SH-B11_00503	TUAT1_00517
nagE		PTS system N-acetylglucosamine-specific EIICBA component	6	6	1	2	1369				1364	1364	1364	C4_00639	GR8_01729	HM-7_02950	MTCC-B6033_00753	SH-B11_00791	TUAT1_00771
pdaC_3		Peptidoglycan-N-acetylmuramic acid deacetylase PdaC	6	6	1	2	4585				1409	1409	1409	C4_03036	GR8_00353	HM-7_01429	MTCC-B6033_03246	SH-B11_03311	TUAT1_03235
cysT		Sulfate transport system permease protein CysT	6	6	1	2	1962				845	848	846	C4_01114	GR8_02203	HM-7_03428	MTCC-B6033_01291	SH-B11_01261	TUAT1_01241
yocK_3		General stress protein 16O	6	6	1	2	4992				734	734	734	C4_02669	GR8_03766	HM-7_01051	MTCC-B6033_02862	SH-B11_02939	TUAT1_02853
aroE_2		Shikimate dehydrogenase (NADP(+))	6	6	1	2	3963				902	902	902	C4_03575	GR8_00896	HM-7_01956	MTCC-B6033_03794	SH-B11_03872	TUAT1_03763
group_4462		hypothetical protein	6	6	1	2	1068				335	335	335	C4_00397	GR8_01496	HM-7_02561	MTCC-B6033_00495	SH-B11_00508	TUAT1_00522
cstA		Carbon starvation protein A	6	6	1	2	5207				1796	1796	1796	C4_02470	GR8_03568	HM-7_00854	MTCC-B6033_02662	SH-B11_02736	TUAT1_02657
stoA_2		Sporulation thiol-disulfide oxidoreductase A	6	6	1	2	2577				503	503	503	C4_01639	GR8_02735	HM-7_03955	MTCC-B6033_01822	SH-B11_01835	TUAT1_01770
tspO		Tryptophan-rich protein TspO	6	6	1	2	4991				476	476	476	C4_02670	GR8_03767	HM-7_01052	MTCC-B6033_02863	SH-B11_02940	TUAT1_02854
spo0A_1		Stage 0 sporulation protein A	6	6	1	2	859				938	938	938	C4_00211	GR8_01303	HM-7_02369	MTCC-B6033_00315	SH-B11_00313	TUAT1_00327
ykoC		Putative HMP/thiamine permease protein YkoC	6	6	1	2	4049				734	734	734	C4_03500	GR8_00822	HM-7_01882	MTCC-B6033_03708	SH-B11_03791	TUAT1_03689
aspS		Aspartate--tRNA ligase	6	6	1	2	5399				1784	1784	1784	C4_02343	GR8_03440	HM-7_00726	MTCC-B6033_02532	SH-B11_02604	TUAT1_02477
group_4469		hypothetical protein	6	6	1	2	4807				635	635	635	C4_02848	GR8_00164	HM-7_01240	MTCC-B6033_03057	SH-B11_03135	TUAT1_03044
pdhC_2		Dihydrolipoyllysine-residue acetyltransferase component of pyruvate dehydrogenase complex	6	6	1	2	1972				1322	1322	1322	C4_01124	GR8_02213	HM-7_03438	MTCC-B6033_01301	SH-B11_01271	TUAT1_01251
pepF1_1		Oligoendopeptidase F, plasmid	6	6	1	2	1819				1991	1991	1991	C4_01023	GR8_02121	HM-7_03336	MTCC-B6033_01198	SH-B11_01175	TUAT1_01155
yflT_1		General stress protein 17M	6	6	1	2	1345				347	347	347	C4_00617	GR8_01707	HM-7_02929	MTCC-B6033_00732	SH-B11_00769	TUAT1_00750
norG		HTH-type transcriptional regulator NorG	6	6	1	2	3836				1478	1478	1478	C4_03685	GR8_01004	HM-7_02066	MTCC-B6033_00016	SH-B11_00017	TUAT1_00016
flgB		Flagellar basal body rod protein FlgB	6	6	1	2	2380				389	389	389	C4_01462	GR8_02551	HM-7_03775	MTCC-B6033_01642	SH-B11_01659	TUAT1_01589
srlR_1		Glucitol operon repressor	6	6	1	2	2190				755	755	755	C4_01279	GR8_02367	HM-7_03592	MTCC-B6033_01458	SH-B11_01476	TUAT1_01407
yumC_2		Ferredoxin--NADP reductase 2	6	6	1	2	4827				998	998	998	C4_02828	GR8_00144	HM-7_01220	MTCC-B6033_03037	SH-B11_03113	TUAT1_03022
group_4476		hypothetical protein	6	6	1	2	2217				635	635	635	C4_01306	GR8_02395	HM-7_03619	MTCC-B6033_01486	SH-B11_01503	TUAT1_01434
yrhH		Putative methyltransferase YrhH	6	6	1	2	5442				602	602	602	C4_02302	GR8_03400	HM-7_00686	MTCC-B6033_02492	SH-B11_02564	TUAT1_02437
cytR		HTH-type transcriptional repressor CytR	6	6	1	2	2634				1040	1040	1040	C4_01690	GR8_02784	HM-7_04007	MTCC-B6033_01871	SH-B11_01882	TUAT1_01816
citS		Sensor protein CitS	6	6	1	2	1353				1595	1595	1595	C4_00625	GR8_01715	HM-7_02937	MTCC-B6033_00740	SH-B11_00777	TUAT1_00758
fadH_1		3-oxoacyl-[acyl-carrier-protein] reductase FabG	6	6	1	2	1974				695	695	695	C4_01126	GR8_02215	HM-7_03440	MTCC-B6033_01303	SH-B11_01273	TUAT1_01253
sinR_3		HTH-type transcriptional regulator SinR	6	6	1	2	4590				470	470	470	C4_03031	GR8_00348	HM-7_01424	MTCC-B6033_03241	SH-B11_03306	TUAT1_03230
pyrB		Aspartate carbamoyltransferase	6	6	1	2	2310				923	923	923	C4_01394	GR8_02483	HM-7_03707	MTCC-B6033_01574	SH-B11_01591	TUAT1_01521
rsbRC		RsbT co-antagonist protein RsbRC	6	6	1	2	2560				848	854	853	C4_01622	GR8_02718	HM-7_03938	MTCC-B6033_01805	SH-B11_01818	TUAT1_01753
hemB		Delta-aminolevulinic acid dehydratase	6	6	1	2	5338				971	971	971	C4_02401	GR8_03498	HM-7_00784	MTCC-B6033_02590	SH-B11_02662	TUAT1_02535
murJ_2		Lipid II flippase MurJ	6	6	1	2	5071				1622	1622	1622	C4_02593	GR8_03692	HM-7_00976	MTCC-B6033_02787	SH-B11_02863	TUAT1_02778
cobB		NAD-dependent protein deacetylase	6	6	1	2	1597				746	746	746	C4_00851	GR8_01942	HM-7_03163	MTCC-B6033_00969	SH-B11_01002	TUAT1_00983
ftsW_2		putative peptidoglycan glycosyltransferase FtsW	6	6	1	2	2278				1070	1070	1070	C4_01362	GR8_02451	HM-7_03675	MTCC-B6033_01542	SH-B11_01559	TUAT1_01489
dacF		D-alanyl-D-alanine carboxypeptidase DacF	6	6	1	2	3194				1187	1187	1187	C4_02017	GR8_03114	HM-7_00391	MTCC-B6033_02201	SH-B11_02211	TUAT1_02144
argJ		Arginine biosynthesis bifunctional protein ArgJ	6	6	1	2	1776				1220	1220	1220	C4_00987	GR8_02080	HM-7_03300	MTCC-B6033_01162	SH-B11_01139	TUAT1_01119
group_4489		hypothetical protein	6	6	1	2	1077				479	479	479	C4_00405	GR8_01504	HM-7_02569	MTCC-B6033_00503	SH-B11_00516	TUAT1_00530
proC_1		Pyrroline-5-carboxylate reductase	6	6	1	2	1982				824	824	824	C4_01133	GR8_02222	HM-7_03447	MTCC-B6033_01310	SH-B11_01280	TUAT1_01260
yunB		Sporulation protein YunB	6	6	1	2	4802				770	770	770	C4_02852	GR8_00169	HM-7_01245	MTCC-B6033_03062	SH-B11_03140	TUAT1_03049
ctpB		Carboxy-terminal processing protease CtpB	6	6	1	2	4506				1448	1448	1448	C4_03104	GR8_00427	HM-7_01498	MTCC-B6033_03314	SH-B11_03380	TUAT1_03299
sirA		Sporulation inhibitor of replication protein SirA	6	6	1	2	2568				446	446	446	C4_01630	GR8_02726	HM-7_03946	MTCC-B6033_01813	SH-B11_01826	TUAT1_01761
lon2		Lon protease 2	6	6	1	2	5328				1661	1661	1661	C4_02412	GR8_03506	HM-7_00795	MTCC-B6033_02598	SH-B11_02673	TUAT1_02543
hisZ		ATP phosphoribosyltransferase regulatory subunit	6	6	1	2	4541				1175	1175	1175	C4_03069	GR8_00391	HM-7_01463	MTCC-B6033_03280	SH-B11_03346	TUAT1_03264
mcpA_3		Methyl-accepting chemotaxis protein McpA	6	6	1	2	1764				1649	1649	1649	C4_00975	GR8_02068	HM-7_03288	MTCC-B6033_01150	SH-B11_01127	TUAT1_01107
group_4496		hypothetical protein	6	6	1	2	2488				449	449	449	C4_01566	GR8_02655	HM-7_03878	MTCC-B6033_01747	SH-B11_01765	TUAT1_01693
recN		DNA repair protein RecN	6	6	1	2	3277				1733	1733	1733	C4_02094	GR8_03191	HM-7_00469	MTCC-B6033_02279	SH-B11_02291	TUAT1_02221
dnaX_2		DNA polymerase III subunit gamma/tau	6	6	1	2	3813				989	989	989	C4_03708	GR8_01032	HM-7_02094	MTCC-B6033_00044	SH-B11_00046	TUAT1_00044
gltB		Glutamate synthase [NADPH] small chain	6	6	1	2	2704				1484	1484	1484	C4_01754	GR8_02850	HM-7_04070	MTCC-B6033_01937	SH-B11_01945	TUAT1_01876
kipI		Kinase A inhibitor	6	6	1	2	1020				746	746	746	C4_00356	GR8_01450	HM-7_02520	MTCC-B6033_00454	SH-B11_00464	TUAT1_00479
group_450		N(G),N(G)-dimethylarginine dimethylaminohydrolase	6	6	1	2	1992				860	860	860	C4_01143	GR8_02233	HM-7_03457	MTCC-B6033_01320	SH-B11_01290	TUAT1_01270
group_4500		hypothetical protein	6	6	1	2	3400				1190	1190	1190	C4_02206	GR8_03303	HM-7_00581	MTCC-B6033_02391	SH-B11_02403	TUAT1_02333
ilvB_2		Acetolactate synthase large subunit	6	6	1	2	5318				1724	1724	1724	C4_02422	GR8_03516	HM-7_00805	MTCC-B6033_02608	SH-B11_02683	TUAT1_02553
bfmBAA		2-oxoisovalerate dehydrogenase subunit alpha	6	6	1	2	3264				995	995	995	C4_02081	GR8_03179	HM-7_00456	MTCC-B6033_02267	SH-B11_02279	TUAT1_02209
citN_1		Citrate transporter	6	6	1	2	5237				1316	1316	1316	C4_02441	GR8_03539	HM-7_00825	MTCC-B6033_02633	SH-B11_02707	TUAT1_02628
group_4504		hypothetical protein	6	6	1	2	5341				1031	1031	1031	C4_02398	GR8_03495	HM-7_00781	MTCC-B6033_02587	SH-B11_02659	TUAT1_02532
glnP		putative glutamine ABC transporter permease protein GlnP	6	6	1	2	5412				650	650	650	C4_02332	GR8_03429	HM-7_00715	MTCC-B6033_02521	SH-B11_02593	TUAT1_02466
zur		Zinc-specific metallo-regulatory protein	6	6	1	2	3373				428	428	428	C4_02179	GR8_03276	HM-7_00554	MTCC-B6033_02364	SH-B11_02376	TUAT1_02306
rocE		Amino-acid permease RocE	6	6	1	2	971				1433	1433	1433	C4_00312	GR8_01407	HM-7_02476	MTCC-B6033_00411	SH-B11_00414	TUAT1_00435
lysS		Lysine--tRNA ligase	6	6	1	2	3762				1499	1499	1499	C4_03761	GR8_01085	HM-7_02147	MTCC-B6033_00098	SH-B11_00099	TUAT1_00097
group_4509		hypothetical protein	6	6	1	2	5163				302	302	302	C4_02511	GR8_03609	HM-7_00895	MTCC-B6033_02704	SH-B11_02780	TUAT1_02698
group_451		hypothetical protein	6	6	1	2	1994				326	326	326	C4_01145	GR8_02235	HM-7_03459	MTCC-B6033_01322	SH-B11_01292	TUAT1_01272
fabHA		3-oxoacyl-[acyl-carrier-protein] synthase 3 protein 1	6	6	1	2	1791				938	938	938	C4_01001	GR8_02094	HM-7_03314	MTCC-B6033_01176	SH-B11_01153	TUAT1_01133
pchA		Salicylate biosynthesis isochorismate synthase	6	6	1	2	4994				1418	1418	1418	C4_02667	GR8_03764	HM-7_01049	MTCC-B6033_02860	SH-B11_02937	TUAT1_02851
yohK		Inner membrane protein YohK	6	6	1	2	4142				680	680	680	C4_03415	GR8_00737	HM-7_01800	MTCC-B6033_03621	SH-B11_03706	TUAT1_03607
group_4513		hypothetical protein	6	6	1	2	3291				632	632	632	C4_02108	GR8_03205	HM-7_00483	MTCC-B6033_02293	SH-B11_02305	TUAT1_02235
lrpC_2		HTH-type transcriptional regulator LrpC	6	6	1	2	4215				479	479	479	C4_03347	GR8_00672	HM-7_01734	MTCC-B6033_03556	SH-B11_03632	TUAT1_03542
ylmA		putative ABC transporter ATP-binding protein YlmA	6	6	1	2	2297				776	776	776	C4_01381	GR8_02470	HM-7_03694	MTCC-B6033_01561	SH-B11_01578	TUAT1_01508
group_4516		hypothetical protein	6	6	1	2	4875				959	959	959	C4_02783	GR8_00099	HM-7_01175	MTCC-B6033_02992	SH-B11_03067	TUAT1_02977
spoVD		Stage V sporulation protein D	6	6	1	2	2273				1919	1919	1919	C4_01357	GR8_02446	HM-7_03670	MTCC-B6033_01537	SH-B11_01554	TUAT1_01485
aroA1		3-phosphoshikimate 1-carboxyvinyltransferase 1	6	6	1	2	3105				1286	1286	1286	C4_01929	GR8_03027	HM-7_00303	MTCC-B6033_02114	SH-B11_02124	TUAT1_02056
gabP_2		GABA permease	6	6	1	2	4018				1337	1337	1337	C4_03528	GR8_00850	HM-7_01910	MTCC-B6033_03738	SH-B11_03819	TUAT1_03717
group_452		hypothetical protein	6	6	1	2	1995				752	752	752	C4_01146	GR8_02236	HM-7_03460	MTCC-B6033_01323	SH-B11_01293	TUAT1_01273
ybbH_3		putative HTH-type transcriptional regulator YbbH	6	6	1	2	4014				857	857	857	C4_03532	GR8_00854	HM-7_01914	MTCC-B6033_03742	SH-B11_03823	TUAT1_03721
cysK_2		Cysteine synthase	6	6	1	2	5078				932	932	932	C4_02587	GR8_03686	HM-7_00970	MTCC-B6033_02781	SH-B11_02857	TUAT1_02772
dcuR_2		Transcriptional regulatory protein DcuR	6	6	1	2	4880				707	707	707	C4_02779	GR8_00095	HM-7_01171	MTCC-B6033_02988	SH-B11_03063	TUAT1_02973
cwlJ		Cell wall hydrolase CwlJ	6	6	1	2	870				428	428	428	C4_00222	GR8_01315	HM-7_02381	MTCC-B6033_00326	SH-B11_00324	TUAT1_00338
group_4524		hypothetical protein	6	6	1	2	5388				2228	2228	2228	C4_02353	GR8_03450	HM-7_00736	MTCC-B6033_02542	SH-B11_02614	TUAT1_02487
mfd		Transcription-repair-coupling factor	6	6	1	2	3789				3533	3533	3533	C4_03732	GR8_01056	HM-7_02118	MTCC-B6033_00068	SH-B11_00070	TUAT1_00068
argH		Argininosuccinate lyase	6	6	1	2	5156				1373	1373	1373	C4_02516	GR8_03615	HM-7_00900	MTCC-B6033_02710	SH-B11_02786	TUAT1_02704
potB		Spermidine/putrescine transport system permease protein PotB	6	6	1	2	947				869	869	869	C4_00292	GR8_01384	HM-7_02453	MTCC-B6033_00393	SH-B11_00394	TUAT1_00409
cmk		Cytidylate kinase	6	6	1	2	3136				677	677	677	C4_01961	GR8_03058	HM-7_00334	MTCC-B6033_02145	SH-B11_02155	TUAT1_02088
pgdA_1		Peptidoglycan-N-acetylglucosamine deacetylase	6	6	1	2	706				764	764	764	C4_00086	GR8_01177	HM-7_02240	MTCC-B6033_00190	SH-B11_00191	TUAT1_00193
ykkD_2		Multidrug resistance protein YkkD	6	6	1	2	2000				314	314	314	C4_01151	GR8_02241	HM-7_03465	MTCC-B6033_01328	SH-B11_01298	TUAT1_01278
lon		Lon protease	6	6	1	2	2261				1028	1028	1028	C4_01345	GR8_02434	HM-7_03658	MTCC-B6033_01525	SH-B11_01542	TUAT1_01473
group_4531		hypothetical protein	6	6	1	2	3854				833	833	833	C4_03666	GR8_00981	HM-7_02042	MTCC-B6033_03885	SH-B11_03961	TUAT1_03846
group_4532		hypothetical protein	6	6	1	2	3859				410	410	410	C4_03661	GR8_00976	HM-7_02037	MTCC-B6033_03880	SH-B11_03956	TUAT1_03841
pstC		Phosphate transport system permease protein PstC	6	6	1	2	3360				926	926	926	C4_02166	GR8_03263	HM-7_00541	MTCC-B6033_02351	SH-B11_02363	TUAT1_02293
group_4534		hypothetical protein	6	6	1	2	5015				782	782	782	C4_02646	GR8_03743	HM-7_01028	MTCC-B6033_02839	SH-B11_02916	TUAT1_02830
group_4535		hypothetical protein	6	6	1	2	4809				434	434	434	C4_02846	GR8_00162	HM-7_01238	MTCC-B6033_03055	SH-B11_03133	TUAT1_03042
hflX		GTPase HflX	6	6	1	2	2504				1262	1262	1262	C4_01582	GR8_02671	HM-7_03894	MTCC-B6033_01763	SH-B11_01781	TUAT1_01709
group_4537		Putative multidrug export ATP-binding/permease protein	6	6	1	2	4281				1715	1715	1715	C4_03301	GR8_00624	HM-7_01696	MTCC-B6033_03509	SH-B11_03582	TUAT1_03496
apc4		Acetophenone carboxylase delta subunit	6	6	1	2	944				1985	1985	1985	C4_00289	GR8_01381	HM-7_02450	MTCC-B6033_00390	SH-B11_00391	TUAT1_00406
group_4539		hypothetical protein	6	6	1	2	5217				404	404	404	C4_02460	GR8_03558	HM-7_00844	MTCC-B6033_02652	SH-B11_02726	TUAT1_02647
group_454		hypothetical protein	6	6	1	2	2014				302	302	302	C4_01163	GR8_02253	HM-7_03478	MTCC-B6033_01342	SH-B11_01311	TUAT1_01291
lipC_2		Spore germination lipase LipC	6	6	1	2	3016				761	761	761	C4_01846	GR8_02943	HM-7_00220	MTCC-B6033_02031	SH-B11_02038	TUAT1_01970
alaS		Alanine--tRNA ligase	6	6	1	2	5417				2636	2636	2636	C4_02327	GR8_03424	HM-7_00710	MTCC-B6033_02516	SH-B11_02588	TUAT1_02461
srlR_2		Glucitol operon repressor	6	6	1	2	2674				752	752	752	C4_01726	GR8_02823	HM-7_04043	MTCC-B6033_01910	SH-B11_01919	TUAT1_01849
group_4543		hypothetical protein	6	6	1	2	5063				683	683	683	C4_02600	GR8_03699	HM-7_00983	MTCC-B6033_02794	SH-B11_02870	TUAT1_02785
group_4544		hypothetical protein	6	6	1	2	2724				479	479	479	C4_01773	GR8_02869	HM-7_04089	MTCC-B6033_01956	SH-B11_01964	TUAT1_01895
cdaR_1		CdaA regulatory protein CdaR	6	6	1	2	720				1406	1406	1406	C4_00108	GR8_01200	HM-7_02263	MTCC-B6033_00213	SH-B11_00214	TUAT1_00218
licB_2		Lichenan-specific phosphotransferase enzyme IIB component	6	6	1	2	4087				323	323	323	C4_03465	GR8_00787	HM-7_01850	MTCC-B6033_03671	SH-B11_03756	TUAT1_03657
glpF		Glycerol uptake facilitator protein	6	6	1	2	1569				815	815	815	C4_00823	GR8_01915	HM-7_03135	MTCC-B6033_00942	SH-B11_00976	TUAT1_00955
rplGA		putative ribosomal protein YlxQ	6	6	1	2	2429				302	302	302	C4_01511	GR8_02600	HM-7_03824	MTCC-B6033_01692	SH-B11_01708	TUAT1_01638
ltaS2_2		Lipoteichoic acid synthase 2	6	6	1	2	4683				1850	1850	1850	C4_02948	GR8_00265	HM-7_01341	MTCC-B6033_03159	SH-B11_03224	TUAT1_03147
group_455		hypothetical protein	6	6	1	2	2017				689	689	689	C4_01166	GR8_02256	HM-7_03481	MTCC-B6033_01345	SH-B11_01314	TUAT1_01294
bcd		Acyl-CoA dehydrogenase, short-chain specific	6	6	1	2	2671				1142	1142	1142	C4_01723	GR8_02820	HM-7_04040	MTCC-B6033_01907	SH-B11_01916	TUAT1_01846
satP		Succinate-acetate/proton symporter SatP	6	6	1	2	2689				620	620	620	C4_01740	GR8_02837	HM-7_04057	MTCC-B6033_01924	SH-B11_01933	TUAT1_01863
guaD		Guanine deaminase	6	6	1	2	2010				470	470	470	C4_01160	GR8_02250	HM-7_03474	MTCC-B6033_01338	SH-B11_01308	TUAT1_01287
artQ_2		Arginine transport system permease protein ArtQ	6	6	1	2	4138				644	644	644	C4_03419	GR8_00741	HM-7_01804	MTCC-B6033_03625	SH-B11_03710	TUAT1_03611
lcfB_1		Long-chain-fatty-acid--CoA ligase	6	6	1	2	852				1508	1508	1508	C4_00204	GR8_01296	HM-7_02362	MTCC-B6033_00308	SH-B11_00306	TUAT1_00320
fecE_2		Fe(3+) dicitrate transport ATP-binding protein FecE	6	6	1	2	4673				743	743	743	C4_02958	GR8_00275	HM-7_01351	MTCC-B6033_03169	SH-B11_03234	TUAT1_03157
group_4556		hypothetical protein	6	6	1	2	2263				518	518	518	C4_01347	GR8_02436	HM-7_03660	MTCC-B6033_01527	SH-B11_01544	TUAT1_01475
cycB		Cyclodextrin-binding protein	6	6	1	2	4000				1265	1265	1265	C4_03542	GR8_00864	HM-7_01924	MTCC-B6033_03754	SH-B11_03833	TUAT1_03731
group_4558		hypothetical protein	6	6	1	2	2570				707	707	707	C4_01632	GR8_02728	HM-7_03948	MTCC-B6033_01815	SH-B11_01828	TUAT1_01763
group_4559		GTP cyclohydrolase 1 type 2	6	6	1	2	3382				1121	1121	1121	C4_02188	GR8_03285	HM-7_00563	MTCC-B6033_02373	SH-B11_02385	TUAT1_02315
mgtE		Magnesium transporter MgtE	6	6	1	2	2020				1301	1358	1348	C4_01169	GR8_02259	HM-7_03484	MTCC-B6033_01348	SH-B11_01318	TUAT1_01297
yabA		Initiation-control protein YabA	6	6	1	2	3811				353	353	353	C4_03710	GR8_01034	HM-7_02096	MTCC-B6033_00046	SH-B11_00048	TUAT1_00046
lrpC_1		HTH-type transcriptional regulator LrpC	6	6	1	2	938				419	419	419	C4_00283	GR8_01375	HM-7_02444	MTCC-B6033_00384	SH-B11_00385	TUAT1_00400
ypdF		Aminopeptidase YpdF	6	6	1	2	3299				1061	1061	1061	C4_02116	GR8_03213	HM-7_00491	MTCC-B6033_02301	SH-B11_02313	TUAT1_02243
ptsI		Phosphoenolpyruvate-protein phosphotransferase	6	6	1	2	2081				1718	1718	1718	C4_01224	GR8_02315	HM-7_03538	MTCC-B6033_01403	SH-B11_01373	TUAT1_01353
glsA2		Glutaminase 2	6	6	1	2	2237				929	929	929	C4_01321	GR8_02410	HM-7_03634	MTCC-B6033_01501	SH-B11_01518	TUAT1_01449
carC		All-trans-zeta-carotene desaturase	6	6	1	2	1743				1517	1517	1517	C4_00954	GR8_02047	HM-7_03267	MTCC-B6033_01129	SH-B11_01106	TUAT1_01086
fruA_4		PTS system fructose-specific EIIABC component	6	6	1	2	2652				1409	1415	1413	C4_01705	GR8_02801	HM-7_04023	MTCC-B6033_01888	SH-B11_01897	TUAT1_01829
ccsA_2		Cytochrome c biogenesis protein CcsA	6	6	1	2	5335				830	830	830	C4_02404	GR8_03501	HM-7_00787	MTCC-B6033_02593	SH-B11_02665	TUAT1_02538
yvgN_1		Glyoxal reductase	6	6	1	2	811				827	827	827	C4_00169	GR8_01261	HM-7_02328	MTCC-B6033_00270	SH-B11_00272	TUAT1_00285
yfkN_2		Trifunctional nucleotide phosphoesterase protein YfkN	6	6	1	2	4799				1373	1373	1373	C4_02854	GR8_00171	HM-7_01247	MTCC-B6033_03064	SH-B11_03142	TUAT1_03051
group_4578		hypothetical protein	6	6	1	2	3015				566	566	566	C4_01845	GR8_02942	HM-7_00219	MTCC-B6033_02030	SH-B11_02037	TUAT1_01969
bacB		H2HPP isomerase	6	6	1	2	4211				707	707	707	C4_03350	GR8_00675	HM-7_01737	MTCC-B6033_03559	SH-B11_03635	TUAT1_03545
gltR_2		HTH-type transcriptional regulator GltR	6	6	1	2	2023				503	863	803	C4_01171	GR8_02261	HM-7_03486	MTCC-B6033_01350	SH-B11_01320	TUAT1_01299
group_4580		hypothetical protein	6	6	1	2	1815				665	665	665	C4_01019	GR8_02117	HM-7_03332	MTCC-B6033_01194	SH-B11_01171	TUAT1_01151
serC		Phosphoserine aminotransferase	6	6	1	2	1639				1079	1079	1079	C4_00888	GR8_01981	HM-7_03200	MTCC-B6033_01005	SH-B11_01039	TUAT1_01019
trpA		Tryptophan synthase alpha chain	6	6	1	2	3108				803	803	803	C4_01932	GR8_03030	HM-7_00306	MTCC-B6033_02117	SH-B11_02127	TUAT1_02059
rocC_2		Amino-acid permease RocC	6	6	1	2	4616				1421	1421	1421	C4_03006	GR8_00323	HM-7_01399	MTCC-B6033_03216	SH-B11_03281	TUAT1_03205
plsY		Glycerol-3-phosphate acyltransferase	6	6	1	2	2584				581	581	581	C4_01646	GR8_02742	HM-7_03962	MTCC-B6033_01829	SH-B11_01842	TUAT1_01777
mscL		Large-conductance mechanosensitive channel	6	6	1	2	4378				395	395	395	C4_03214	GR8_00537	HM-7_01609	MTCC-B6033_03428	SH-B11_03494	TUAT1_03409
srlA		PTS system glucitol/sorbitol-specific EIIC component	6	6	1	2	2294				530	530	530	C4_01378	GR8_02467	HM-7_03691	MTCC-B6033_01558	SH-B11_01575	TUAT1_01505
ytrA_1		HTH-type transcriptional repressor YtrA	6	6	1	2	753				371	371	371	C4_00130	GR8_01225	HM-7_02289	MTCC-B6033_00231	SH-B11_00229	TUAT1_00247
yodC_1		Putative NAD(P)H nitroreductase YodC	6	6	1	2	2772				617	617	617	C4_01817	GR8_02914	HM-7_04134	MTCC-B6033_02002	SH-B11_02009	TUAT1_01941
ydcP_1		putative protease YdcP	6	6	1	2	5428				1268	1268	1268	C4_02316	GR8_03414	HM-7_00700	MTCC-B6033_02506	SH-B11_02578	TUAT1_02451
opuAB		Glycine betaine transport system permease protein OpuAB	6	6	1	2	885				854	854	854	C4_00237	GR8_01330	HM-7_02396	MTCC-B6033_00341	SH-B11_00339	TUAT1_00354
group_4591		hypothetical protein	6	6	1	2	1717				362	362	362	C4_00928	GR8_02021	HM-7_03241	MTCC-B6033_01103	SH-B11_01080	TUAT1_01060
carB_2		Carbamoyl-phosphate synthase large chain	6	6	1	2	2313				3215	3215	3215	C4_01397	GR8_02486	HM-7_03710	MTCC-B6033_01577	SH-B11_01594	TUAT1_01524
htpX_3		Protease HtpX	6	6	1	2	2037				899	899	899	C4_01184	GR8_02274	HM-7_03498	MTCC-B6033_01363	SH-B11_01333	TUAT1_01312
thrC_2		Threonine synthase	6	6	1	2	4815				1061	1061	1061	C4_02840	GR8_00156	HM-7_01232	MTCC-B6033_03049	SH-B11_03127	TUAT1_03036
htrB		Serine protease Do-like HtrB	6	6	1	2	4732				1370	1370	1370	C4_02902	GR8_00221	HM-7_01296	MTCC-B6033_03114	SH-B11_03188	TUAT1_03103
metC		Cystathionine beta-lyase MetC	6	6	1	2	1859				1178	1178	1178	C4_01060	GR8_02158	HM-7_03373	MTCC-B6033_01235	SH-B11_01214	TUAT1_01192
feuB_3		Iron-uptake system permease protein FeuB	6	6	1	2	4586				1028	1028	1028	C4_03035	GR8_00352	HM-7_01428	MTCC-B6033_03245	SH-B11_03310	TUAT1_03234
fliG		Flagellar motor switch protein FliG	6	6	1	2	2384				1016	1016	1016	C4_01466	GR8_02555	HM-7_03779	MTCC-B6033_01646	SH-B11_01663	TUAT1_01593
emrB_2		Multidrug export protein EmrB	6	6	1	2	1545				1619	1619	1619	C4_00800	GR8_01892	HM-7_03112	MTCC-B6033_00919	SH-B11_00953	TUAT1_00932
group_46		hypothetical protein	6	6	1	2	1025				1082	1082	1082	C4_00361	GR8_01455	HM-7_02525	MTCC-B6033_00459	SH-B11_00469	TUAT1_00484
ykoL		Stress response protein YkoL	6	6	1	2	2027				158	164	161	C4_01175	GR8_02265	HM-7_03489	MTCC-B6033_01354	SH-B11_01324	TUAT1_01303
group_4600		hypothetical protein	6	6	1	2	2768				899	902	901	C4_01813	GR8_02910	HM-7_04130	MTCC-B6033_01998	SH-B11_02005	TUAT1_01937
ygaZ		Inner membrane protein YgaZ	6	6	1	2	1173				725	725	725	C4_00475	GR8_01568	HM-7_02638	MTCC-B6033_00582	SH-B11_00595	TUAT1_00599
trpB		Tryptophan synthase beta chain	6	6	1	2	3109				1199	1199	1199	C4_01933	GR8_03031	HM-7_00307	MTCC-B6033_02118	SH-B11_02128	TUAT1_02060
group_4603		hypothetical protein	6	6	1	2	5020				1001	1001	1001	C4_02641	GR8_03738	HM-7_01023	MTCC-B6033_02834	SH-B11_02911	TUAT1_02825
clpP_1		ATP-dependent Clp protease proteolytic subunit	6	6	1	2	3406				1313	1313	1313	C4_02210	GR8_03307	HM-7_00585	MTCC-B6033_02395	SH-B11_02408	TUAT1_02337
hisC		Histidinol-phosphate aminotransferase	6	6	1	2	3107				1097	1097	1097	C4_01931	GR8_03029	HM-7_00305	MTCC-B6033_02116	SH-B11_02126	TUAT1_02058
licC_1		Lichenan permease IIC component	6	6	1	2	4122				1349	1349	1349	C4_03433	GR8_00755	HM-7_01818	MTCC-B6033_03639	SH-B11_03724	TUAT1_03625
bglH_2		Aryl-phospho-beta-D-glucosidase BglH	6	6	1	2	3980				1466	1466	1466	C4_03562	GR8_00884	HM-7_01944	MTCC-B6033_03780	SH-B11_03859	TUAT1_03751
carA_2		Carbamoyl-phosphate synthase small chain	6	6	1	2	2312				1094	1094	1094	C4_01396	GR8_02485	HM-7_03709	MTCC-B6033_01576	SH-B11_01593	TUAT1_01523
icd		Isocitrate dehydrogenase [NADP]	6	6	1	2	5178				1271	1271	1271	C4_02496	GR8_03594	HM-7_00880	MTCC-B6033_02689	SH-B11_02765	TUAT1_02683
pdxS		Pyridoxal 5'-phosphate synthase subunit PdxS	6	6	1	2	3834				884	884	884	C4_03686	GR8_01005	HM-7_02067	MTCC-B6033_00017	SH-B11_00018	TUAT1_00017
group_4611		Sporulation protein cse15	6	6	1	2	2175				917	917	917	C4_01267	GR8_02355	HM-7_03580	MTCC-B6033_01446	SH-B11_01464	TUAT1_01395
natA		ABC transporter ATP-binding protein NatA	6	6	1	2	865				740	740	740	C4_00217	GR8_01309	HM-7_02375	MTCC-B6033_00321	SH-B11_00319	TUAT1_00333
proA_2		Gamma-glutamyl phosphate reductase	6	6	1	2	2712				1268	1268	1268	C4_01761	GR8_02857	HM-7_04077	MTCC-B6033_01944	SH-B11_01952	TUAT1_01883
group_4614		hypothetical protein	6	6	1	2	2461				791	791	791	C4_01541	GR8_02630	HM-7_03854	MTCC-B6033_01722	SH-B11_01738	TUAT1_01668
yfmJ		Putative NADP-dependent oxidoreductase YfmJ	6	6	1	2	1343				1004	1004	1004	C4_00615	GR8_01705	HM-7_02927	MTCC-B6033_00730	SH-B11_00767	TUAT1_00748
group_4616		hypothetical protein	6	6	1	2	5174				389	389	389	C4_02500	GR8_03598	HM-7_00884	MTCC-B6033_02693	SH-B11_02769	TUAT1_02687
parE		DNA topoisomerase 4 subunit B	6	6	1	2	2586				1967	1967	1967	C4_01648	GR8_02744	HM-7_03964	MTCC-B6033_01831	SH-B11_01844	TUAT1_01779
bceA_1		Bacitracin export ATP-binding protein BceA	6	6	1	2	5137				761	761	761	C4_02534	GR8_03635	HM-7_00920	MTCC-B6033_02728	SH-B11_02806	TUAT1_02722
ctaD		Cytochrome c oxidase subunit 1	6	6	1	2	2245				1871	1871	1871	C4_01329	GR8_02418	HM-7_03642	MTCC-B6033_01509	SH-B11_01526	TUAT1_01457
group_462		hypothetical protein	6	6	1	2	2039				527	527	527	C4_01186	GR8_02276	HM-7_03500	MTCC-B6033_01365	SH-B11_01335	TUAT1_01314
gmuC		PTS system oligo-beta-mannoside-specific EIIC component	6	6	1	2	3240				1346	1346	1346	C4_02057	GR8_03155	HM-7_00432	MTCC-B6033_02244	SH-B11_02255	TUAT1_02185
ypwA		Carboxypeptidase 1	6	6	1	2	3057				1505	1505	1505	C4_01884	GR8_02981	HM-7_00258	MTCC-B6033_02068	SH-B11_02078	TUAT1_02010
group_4622		Putative O-methyltransferase/MSMEI_4947	6	6	1	2	1171				662	662	662	C4_00473	GR8_01566	HM-7_02636	MTCC-B6033_00580	SH-B11_00593	TUAT1_00597
patA_2		Peptidoglycan O-acetyltransferase	6	6	1	2	5312				1184	1184	1184	C4_02428	GR8_03522	HM-7_00811	MTCC-B6033_02614	SH-B11_02689	TUAT1_02559
purH		Bifunctional purine biosynthesis protein PurH	6	6	1	2	1253				1538	1538	1538	C4_00543	GR8_01637	HM-7_02858	MTCC-B6033_00657	SH-B11_00681	TUAT1_00676
hepS		Heptaprenyl diphosphate synthase component 1	6	6	1	2	3121				767	767	767	C4_01945	GR8_03043	HM-7_00319	MTCC-B6033_02130	SH-B11_02140	TUAT1_02072
queG		Epoxyqueuosine reductase	6	6	1	2	1539				1151	1151	1151	C4_00794	GR8_01886	HM-7_03106	MTCC-B6033_00913	SH-B11_00947	TUAT1_00926
ywiE_2		putative cardiolipin synthase YwiE	6	6	1	2	4280				1502	1502	1502	C4_03302	GR8_00625	HM-7_01697	MTCC-B6033_03510	SH-B11_03583	TUAT1_03497
mgl		L-methionine gamma-lyase	6	6	1	2	1522				1292	1292	1292	C4_00779	GR8_01871	HM-7_03091	MTCC-B6033_00902	SH-B11_00932	TUAT1_00911
group_4629		hypothetical protein	6	6	1	2	3812				827	827	827	C4_03709	GR8_01033	HM-7_02095	MTCC-B6033_00045	SH-B11_00047	TUAT1_00045
bacF_1		Transaminase BacF	6	6	1	2	2051				1181	1190	1187	C4_01195	GR8_02285	HM-7_03509	MTCC-B6033_01374	SH-B11_01344	TUAT1_01323
ytpA		Phospholipase YtpA	6	6	1	2	5031				779	779	779	C4_02630	GR8_03727	HM-7_01012	MTCC-B6033_02823	SH-B11_02900	TUAT1_02814
dnaD		DNA replication protein DnaD	6	6	1	2	3081				704	704	704	C4_01905	GR8_03003	HM-7_00279	MTCC-B6033_02090	SH-B11_02100	TUAT1_02032
serA		D-3-phosphoglycerate dehydrogenase	6	6	1	2	3154				1574	1574	1574	C4_01978	GR8_03075	HM-7_00352	MTCC-B6033_02162	SH-B11_02172	TUAT1_02105
phoR		Alkaline phosphatase synthesis sensor protein PhoR	6	6	1	2	5181				1742	1742	1742	C4_02493	GR8_03591	HM-7_00877	MTCC-B6033_02686	SH-B11_02762	TUAT1_02680
group_4634		Putative heme-dependent peroxidase	6	6	1	2	4223				770	770	770	C4_03337	GR8_00670	HM-7_01732	MTCC-B6033_03554	SH-B11_03629	TUAT1_03540
group_4635		hypothetical protein	6	6	1	2	5214				533	533	533	C4_02463	GR8_03561	HM-7_00847	MTCC-B6033_02655	SH-B11_02729	TUAT1_02650
speE		Polyamine aminopropyltransferase	6	6	1	2	4272				830	830	830	C4_03308	GR8_00631	HM-7_01703	MTCC-B6033_03517	SH-B11_03590	TUAT1_03503
cwlD		Germination-specific N-acetylmuramoyl-L-alanine amidase	6	6	1	2	700				713	713	713	C4_00082	GR8_01173	HM-7_02236	MTCC-B6033_00186	SH-B11_00187	TUAT1_00189
group_4638		hypothetical protein	6	6	1	2	1766				842	842	842	C4_00977	GR8_02070	HM-7_03290	MTCC-B6033_01152	SH-B11_01129	TUAT1_01109
vpr		Minor extracellular protease vpr	6	6	1	2	4174				2423	2423	2423	C4_03383	GR8_00708	HM-7_01771	MTCC-B6033_03592	SH-B11_03671	TUAT1_03578
queD		6-carboxy-5,6,7,8-tetrahydropterin synthase	6	6	1	2	2065				440	440	440	C4_01209	GR8_02299	HM-7_03523	MTCC-B6033_01388	SH-B11_01358	TUAT1_01337
comGA		ComG operon protein 1	6	6	1	2	3335				1070	1070	1070	C4_02143	GR8_03240	HM-7_00518	MTCC-B6033_02328	SH-B11_02340	TUAT1_02270
argS		Arginine--tRNA ligase	6	6	1	2	4278				1673	1673	1673	C4_03304	GR8_00627	HM-7_01699	MTCC-B6033_03513	SH-B11_03586	TUAT1_03499
ynaI		Low conductance mechanosensitive channel YnaI	6	6	1	2	1596				1088	1088	1088	C4_00850	GR8_01941	HM-7_03162	MTCC-B6033_00968	SH-B11_01001	TUAT1_00982
group_4643		hypothetical protein	6	6	1	2	2766				350	350	350	C4_01811	GR8_02908	HM-7_04128	MTCC-B6033_01996	SH-B11_02003	TUAT1_01935
glyA		Serine hydroxymethyltransferase	6	6	1	2	4328				1247	1247	1247	C4_03264	GR8_00587	HM-7_01659	MTCC-B6033_03472	SH-B11_03539	TUAT1_03459
nasD		Nitrite reductase [NAD(P)H]	6	6	1	2	2700				2411	2411	2411	C4_01750	GR8_02846	HM-7_04066	MTCC-B6033_01933	SH-B11_01941	TUAT1_01872
msrB		Peptide methionine sulfoxide reductase MsrB	6	6	1	2	3009				431	431	431	C4_01839	GR8_02936	HM-7_00213	MTCC-B6033_02024	SH-B11_02031	TUAT1_01963
lytD		Beta-N-acetylglucosaminidase	6	6	1	2	4431				2630	2630	2630	C4_03164	GR8_00487	HM-7_01559	MTCC-B6033_03378	SH-B11_03444	TUAT1_03359
malF		Maltose transport system permease protein MalF	6	6	1	2	3999				1307	1307	1307	C4_03543	GR8_00865	HM-7_01925	MTCC-B6033_03755	SH-B11_03834	TUAT1_03732
ycdA_2		putative lipoprotein YcdA	6	6	1	2	869				1061	1061	1061	C4_00221	GR8_01314	HM-7_02380	MTCC-B6033_00325	SH-B11_00323	TUAT1_00337
ccpB		Catabolite control protein B	6	6	1	2	2077				989	989	989	C4_01220	GR8_02311	HM-7_03534	MTCC-B6033_01399	SH-B11_01369	TUAT1_01349
group_4650		hypothetical protein	6	6	1	2	3363				1286	1286	1286	C4_02169	GR8_03266	HM-7_00544	MTCC-B6033_02354	SH-B11_02366	TUAT1_02296
thiI		putative tRNA sulfurtransferase	6	6	1	2	5124				1205	1205	1205	C4_02542	GR8_03645	HM-7_00929	MTCC-B6033_02738	SH-B11_02816	TUAT1_02731
group_4652		hypothetical protein	6	6	1	2	2400				779	779	779	C4_01482	GR8_02571	HM-7_03795	MTCC-B6033_01662	SH-B11_01679	TUAT1_01609
lipO		Lipoprotein LipO	6	6	1	2	5054				1499	1499	1499	C4_02609	GR8_03708	HM-7_00992	MTCC-B6033_02803	SH-B11_02879	TUAT1_02794
spoIIM		Stage II sporulation protein M	6	6	1	2	3200				644	644	644	C4_02023	GR8_03120	HM-7_00397	MTCC-B6033_02207	SH-B11_02217	TUAT1_02150
folD		Bifunctional protein FolD protein	6	6	1	2	3284				851	851	851	C4_02101	GR8_03198	HM-7_00476	MTCC-B6033_02286	SH-B11_02298	TUAT1_02228
tetA_4		Tetracycline resistance protein, class C	6	6	1	2	4791				1193	1193	1193	C4_02858	GR8_00175	HM-7_01251	MTCC-B6033_03068	SH-B11_03146	TUAT1_03055
cheB		Chemotaxis response regulator protein-glutamate methylesterase	6	6	1	2	2405				1082	1082	1082	C4_01487	GR8_02576	HM-7_03800	MTCC-B6033_01667	SH-B11_01684	TUAT1_01614
nrnA		Bifunctional oligoribonuclease and PAP phosphatase NrnA	6	6	1	2	5164				941	941	941	C4_02510	GR8_03608	HM-7_00894	MTCC-B6033_02703	SH-B11_02779	TUAT1_02697
group_4659		hypothetical protein	6	6	1	2	4936				611	611	611	C4_02729	GR8_00045	HM-7_01121	MTCC-B6033_02936	SH-B11_03013	TUAT1_02923
garR_1		2-hydroxy-3-oxopropionate reductase	6	6	1	2	2086				872	872	872	C4_01229	GR8_02320	HM-7_03543	MTCC-B6033_01408	SH-B11_01378	TUAT1_01358
gmuR		HTH-type transcriptional regulator GmuR	6	6	1	2	3238				722	722	722	C4_02055	GR8_03153	HM-7_00430	MTCC-B6033_02242	SH-B11_02253	TUAT1_02183
mcpA_1		Methyl-accepting chemotaxis protein McpA	6	6	1	2	941				1697	1697	1697	C4_00286	GR8_01378	HM-7_02447	MTCC-B6033_00387	SH-B11_00388	TUAT1_00403
dbpA_2		ATP-dependent RNA helicase DbpA	6	6	1	2	4383				2777	2777	2777	C4_03209	GR8_00532	HM-7_01604	MTCC-B6033_03423	SH-B11_03489	TUAT1_03404
prpE_2		Bis(5'-nucleosyl)-tetraphosphatase PrpE [asymmetrical]	6	6	1	2	2552				2216	2216	2216	C4_01615	GR8_02711	HM-7_03931	MTCC-B6033_01798	SH-B11_01811	TUAT1_01746
tetA_2		Tetracycline resistance protein, class B	6	6	1	2	3221				1235	1235	1235	C4_02041	GR8_03139	HM-7_00416	MTCC-B6033_02226	SH-B11_02236	TUAT1_02169
nikA_1		Nickel-binding periplasmic protein	6	6	1	2	4605				1619	1619	1619	C4_03017	GR8_00334	HM-7_01410	MTCC-B6033_03227	SH-B11_03292	TUAT1_03216
yusO_3		putative HTH-type transcriptional regulator YusO	6	6	1	2	3011				431	431	431	C4_01841	GR8_02938	HM-7_00215	MTCC-B6033_02026	SH-B11_02033	TUAT1_01965
yfiC		tRNA1(Val) (adenine(37)-N6)-methyltransferase	6	6	1	2	3810				743	743	743	C4_03711	GR8_01035	HM-7_02097	MTCC-B6033_00047	SH-B11_00049	TUAT1_00047
spoIIE		Stage II sporulation protein E	6	6	1	2	3780				2483	2483	2483	C4_03743	GR8_01067	HM-7_02129	MTCC-B6033_00080	SH-B11_00081	TUAT1_00079
dtd3		D-aminoacyl-tRNA deacylase	6	6	1	2	3805				767	767	767	C4_03716	GR8_01040	HM-7_02102	MTCC-B6033_00052	SH-B11_00054	TUAT1_00052
cpdA_1		3',5'-cyclic adenosine monophosphate phosphodiesterase CpdA	6	6	1	2	2155				857	893	869	C4_01247	GR8_02335	HM-7_03560	MTCC-B6033_01425	SH-B11_01444	TUAT1_01375
cheW_2		Chemotaxis protein CheW	6	6	1	2	3250				464	464	464	C4_02067	GR8_03165	HM-7_00442	MTCC-B6033_02253	SH-B11_02265	TUAT1_02195
xerC		Tyrosine recombinase XerC	6	6	1	2	2376				917	917	917	C4_01458	GR8_02547	HM-7_03771	MTCC-B6033_01638	SH-B11_01655	TUAT1_01585
fliN		Flagellar motor switch protein FliN	6	6	1	2	2395				1121	1121	1121	C4_01477	GR8_02566	HM-7_03790	MTCC-B6033_01657	SH-B11_01674	TUAT1_01604
gutB_2		Sorbitol dehydrogenase	6	6	1	2	5452				1040	1040	1040	C4_02295	GR8_03390	HM-7_00676	MTCC-B6033_02485	SH-B11_02554	TUAT1_02427
spoVB		Stage V sporulation protein B	6	6	1	2	5386				1562	1562	1562	C4_02355	GR8_03452	HM-7_00738	MTCC-B6033_02544	SH-B11_02616	TUAT1_02489
kipR_1		HTH-type transcriptional regulator KipR	6	6	1	2	919				773	773	773	C4_00264	GR8_01359	HM-7_02428	MTCC-B6033_00368	SH-B11_00366	TUAT1_00381
dnaA		Chromosomal replication initiator protein DnaA	6	6	1	2	3846				1328	1340	1336	C4_03674	GR8_00989	HM-7_02050	MTCC-B6033_00001	SH-B11_00001	TUAT1_00001
group_4677		hypothetical protein	6	6	1	2	2467				794	794	794	C4_01547	GR8_02636	HM-7_03860	MTCC-B6033_01728	SH-B11_01744	TUAT1_01674
yfkN_1		Trifunctional nucleotide phosphoesterase protein YfkN	6	6	1	2	1383				4280	4280	4280	C4_00652	GR8_01741	HM-7_02963	MTCC-B6033_00765	SH-B11_00803	TUAT1_00783
group_4679		hypothetical protein	6	6	1	2	4942				383	383	383	C4_02724	GR8_00040	HM-7_01116	MTCC-B6033_02930	SH-B11_03008	TUAT1_02918
group_468		hypothetical protein	6	6	1	2	2160				515	515	515	C4_01252	GR8_02340	HM-7_03565	MTCC-B6033_01430	SH-B11_01449	TUAT1_01380
fabG_3		3-oxoacyl-[acyl-carrier-protein] reductase FabG	6	6	1	2	2353				743	743	743	C4_01436	GR8_02525	HM-7_03749	MTCC-B6033_01616	SH-B11_01633	TUAT1_01563
uvrC		UvrABC system protein C	6	6	1	2	5227				1772	1772	1772	C4_02451	GR8_03549	HM-7_00835	MTCC-B6033_02643	SH-B11_02717	TUAT1_02638
queF		NADPH-dependent 7-cyano-7-deazaguanine reductase	6	6	1	2	2067				497	497	497	C4_01211	GR8_02301	HM-7_03525	MTCC-B6033_01390	SH-B11_01360	TUAT1_01339
yxeO_2		putative amino-acid import ATP-binding protein YxeO	6	6	1	2	5458				764	764	764	C4_02290	GR8_03385	HM-7_00671	MTCC-B6033_02480	SH-B11_02549	TUAT1_02422
alsT_2		Amino-acid carrier protein AlsT	6	6	1	2	1386				1355	1355	1355	C4_00655	GR8_01744	HM-7_02966	MTCC-B6033_00768	SH-B11_00806	TUAT1_00786
group_4685		hypothetical protein	6	6	1	2	2252				428	428	428	C4_01336	GR8_02425	HM-7_03649	MTCC-B6033_01516	SH-B11_01533	TUAT1_01464
miaB		tRNA-2-methylthio-N(6)-dimethylallyladenosine synthase	6	6	1	2	2473				1526	1526	1526	C4_01553	GR8_02642	HM-7_03865	MTCC-B6033_01734	SH-B11_01750	TUAT1_01680
treA		Trehalose-6-phosphate hydrolase	6	6	1	2	1380				1700	1700	1700	C4_00649	GR8_01738	HM-7_02960	MTCC-B6033_00762	SH-B11_00800	TUAT1_00780
fabL		Enoyl-[acyl-carrier-protein] reductase [NADPH] FabL	6	6	1	2	1490				752	752	752	C4_00736	GR8_01826	HM-7_03047	MTCC-B6033_00856	SH-B11_00886	TUAT1_00864
citB		Aconitate hydratase A	6	6	1	2	2576				2729	2729	2729	C4_01638	GR8_02734	HM-7_03954	MTCC-B6033_01821	SH-B11_01834	TUAT1_01769
moeB		Molybdopterin-synthase adenylyltransferase	6	6	1	2	2178				1016	1016	1016	C4_01269	GR8_02357	HM-7_03582	MTCC-B6033_01448	SH-B11_01466	TUAT1_01397
katA_1		Catalase	6	6	1	2	1577				1475	1475	1475	C4_00831	GR8_01923	HM-7_03143	MTCC-B6033_00950	SH-B11_00984	TUAT1_00963
group_4691		hypothetical protein	6	6	1	2	1154				473	473	473	C4_00457	GR8_01551	HM-7_02620	MTCC-B6033_00565	SH-B11_00578	TUAT1_00582
lspA		Lipoprotein signal peptidase	6	6	1	2	2306				467	467	467	C4_01390	GR8_02479	HM-7_03703	MTCC-B6033_01570	SH-B11_01587	TUAT1_01517
dnaK		Chaperone protein DnaK	6	6	1	2	3414				1838	1841	1838	C4_02218	GR8_03315	HM-7_00593	MTCC-B6033_02403	SH-B11_02416	TUAT1_02345
tqsA_2		AI-2 transport protein TqsA	6	6	1	2	4849				1103	1103	1103	C4_02807	GR8_00123	HM-7_01199	MTCC-B6033_03016	SH-B11_03092	TUAT1_03001
clsC		Cardiolipin synthase C	6	6	1	2	2655				1406	1406	1406	C4_01708	GR8_02804	HM-7_04026	MTCC-B6033_01891	SH-B11_01900	TUAT1_01832
hisS		Histidine--tRNA ligase	6	6	1	2	5398				1274	1274	1274	C4_02344	GR8_03441	HM-7_00727	MTCC-B6033_02533	SH-B11_02605	TUAT1_02478
pnp		Polyribonucleotide nucleotidyltransferase	6	6	1	2	2436				2117	2117	2117	C4_01518	GR8_02607	HM-7_03831	MTCC-B6033_01699	SH-B11_01715	TUAT1_01645
dpaA		Dipicolinate synthase subunit A	6	6	1	2	2442				902	902	902	C4_01523	GR8_02612	HM-7_03836	MTCC-B6033_01704	SH-B11_01720	TUAT1_01650
gatY		D-tagatose-1,6-bisphosphate aldolase subunit GatY	6	6	1	2	2649				869	869	869	C4_01703	GR8_02799	HM-7_04021	MTCC-B6033_01886	SH-B11_01895	TUAT1_01827
group_47	acrR	hypothetical protein	6	6	1	2	1133				572	578	573	C4_00443	GR8_01538	HM-7_02607	MTCC-B6033_00548	SH-B11_00556	TUAT1_00568
moaE		Molybdopterin synthase catalytic subunit	6	6	1	2	2182				491	491	491	C4_01272	GR8_02360	HM-7_03585	MTCC-B6033_01451	SH-B11_01469	TUAT1_01400
araQ_2		L-arabinose transport system permease protein AraQ	6	6	1	2	5053				878	878	878	C4_02610	GR8_03709	HM-7_00993	MTCC-B6033_02804	SH-B11_02880	TUAT1_02795
group_4701		hypothetical protein	6	6	1	2	4954				1010	1010	1010	C4_02714	GR8_00030	HM-7_01106	MTCC-B6033_02920	SH-B11_02998	TUAT1_02908
group_4702		hypothetical protein	6	6	1	2	2249				365	365	365	C4_01333	GR8_02422	HM-7_03646	MTCC-B6033_01513	SH-B11_01530	TUAT1_01461
menA		1,4-dihydroxy-2-naphthoate octaprenyltransferase	6	6	1	2	4993				938	938	938	C4_02668	GR8_03765	HM-7_01050	MTCC-B6033_02861	SH-B11_02938	TUAT1_02852
cysS		Cysteine--tRNA ligase	6	6	1	2	3750				1400	1400	1400	C4_00012	GR8_01112	HM-7_02174	MTCC-B6033_00125	SH-B11_00126	TUAT1_00124
tcyL		L-cystine transport system permease protein TcyL	6	6	1	2	5456				698	698	698	C4_02292	GR8_03387	HM-7_00673	MTCC-B6033_02482	SH-B11_02551	TUAT1_02424
wprA		Cell wall-associated protease	6	6	1	2	832				2666	2666	2666	C4_00186	GR8_01277	HM-7_02343	MTCC-B6033_00289	SH-B11_00287	TUAT1_00301
ccsA_1		Cytochrome c biogenesis protein CcsA	6	6	1	2	3160				1178	1178	1178	C4_01984	GR8_03081	HM-7_00358	MTCC-B6033_02168	SH-B11_02178	TUAT1_02111
yqjA		Inner membrane protein YqjA	6	6	1	2	2030				614	614	614	C4_01178	GR8_02268	HM-7_03492	MTCC-B6033_01357	SH-B11_01327	TUAT1_01306
metQ		Methionine-binding lipoprotein MetQ	6	6	1	2	4752				821	821	821	C4_02883	GR8_00202	HM-7_01277	MTCC-B6033_03095	SH-B11_03169	TUAT1_03084
group_4710		hypothetical protein	6	6	1	2	854				365	365	365	C4_00206	GR8_01298	HM-7_02364	MTCC-B6033_00310	SH-B11_00308	TUAT1_00322
gerBA_1		Spore germination protein B1	6	6	1	2	4417				1466	1466	1466	C4_03178	GR8_00501	HM-7_01573	MTCC-B6033_03392	SH-B11_03458	TUAT1_03373
hom		Homoserine dehydrogenase	6	6	1	2	4814				1301	1301	1301	C4_02841	GR8_00157	HM-7_01233	MTCC-B6033_03050	SH-B11_03128	TUAT1_03037
mntP_1		manganese efflux pump MntP	6	6	1	2	5184				632	632	632	C4_02490	GR8_03588	HM-7_00874	MTCC-B6033_02683	SH-B11_02759	TUAT1_02677
glcT		PtsGHI operon antiterminator	6	6	1	2	2078				854	854	854	C4_01221	GR8_02312	HM-7_03535	MTCC-B6033_01400	SH-B11_01370	TUAT1_01350
rok		Repressor Rok	6	6	1	2	2174				581	581	581	C4_01266	GR8_02354	HM-7_03579	MTCC-B6033_01445	SH-B11_01463	TUAT1_01394
bcrC_2		Undecaprenyl-diphosphatase BcrC	6	6	1	2	4368				599	599	599	C4_03224	GR8_00547	HM-7_01619	MTCC-B6033_03438	SH-B11_03505	TUAT1_03419
yerA		Putative adenine deaminase YerA	6	6	1	2	1263				1742	1742	1742	C4_00553	GR8_01647	HM-7_02868	MTCC-B6033_00667	SH-B11_00691	TUAT1_00687
group_4718		Cobalt-dependent inorganic pyrophosphatase	6	6	1	2	5162				1322	1322	1322	C4_02512	GR8_03611	HM-7_00896	MTCC-B6033_02706	SH-B11_02782	TUAT1_02700
rbgA		Ribosome biogenesis GTPase A	6	6	1	2	2367				848	848	848	C4_01449	GR8_02538	HM-7_03762	MTCC-B6033_01629	SH-B11_01646	TUAT1_01576
yknY		putative ABC transporter ATP-binding protein YknY	6	6	1	2	2188				686	701	698	C4_01277	GR8_02365	HM-7_03590	MTCC-B6033_01456	SH-B11_01474	TUAT1_01405
minC		Septum site-determining protein MinC	6	6	1	2	5352				683	683	683	C4_02387	GR8_03484	HM-7_00770	MTCC-B6033_02576	SH-B11_02648	TUAT1_02521
mreB_3		Rod shape-determining protein MreB	6	6	1	2	4372				1001	1001	1001	C4_03220	GR8_00543	HM-7_01615	MTCC-B6033_03434	SH-B11_03500	TUAT1_03415
nrgA		Ammonium transporter NrgA	6	6	1	2	4363				1208	1208	1208	C4_03229	GR8_00552	HM-7_01624	MTCC-B6033_03443	SH-B11_03510	TUAT1_03424
group_4723		hypothetical protein	6	6	1	2	3857				626	626	626	C4_03663	GR8_00978	HM-7_02039	MTCC-B6033_03882	SH-B11_03958	TUAT1_03843
group_4724		Farnesyl diphosphate synthase	6	6	1	2	3281				890	890	890	C4_02098	GR8_03195	HM-7_00473	MTCC-B6033_02283	SH-B11_02295	TUAT1_02225
ykuD_2		Putative L,D-transpeptidase YkuD	6	6	1	2	3254				509	509	509	C4_02071	GR8_03169	HM-7_00446	MTCC-B6033_02257	SH-B11_02269	TUAT1_02199
group_4726		hypothetical protein	6	6	1	2	3983				212	212	212	C4_03559	GR8_00881	HM-7_01941	MTCC-B6033_03777	SH-B11_03856	TUAT1_03748
pdhD_4		Dihydrolipoyl dehydrogenase	6	6	1	2	3265				1424	1424	1424	C4_02082	GR8_03180	HM-7_00457	MTCC-B6033_02268	SH-B11_02280	TUAT1_02210
tuaG		Putative teichuronic acid biosynthesis glycosyltransferase TuaG	6	6	1	2	4469				755	755	755	C4_03140	GR8_00463	HM-7_01534	MTCC-B6033_03350	SH-B11_03416	TUAT1_03335
glnH_1		ABC transporter glutamine-binding protein GlnH	6	6	1	2	5414				809	809	809	C4_02330	GR8_03427	HM-7_00713	MTCC-B6033_02519	SH-B11_02591	TUAT1_02464
group_473		hypothetical protein	6	6	1	2	2214				389	455	411	C4_01303	GR8_02392	HM-7_03616	MTCC-B6033_01483	SH-B11_01500	TUAT1_01431
bacA		Prephenate decarboxylase	6	6	1	2	4212				602	605	603	C4_03349	GR8_00674	HM-7_01736	MTCC-B6033_03558	SH-B11_03634	TUAT1_03544
hmoB		Heme-degrading monooxygenase HmoB	6	6	1	2	1646				485	485	485	C4_00895	GR8_01988	HM-7_03207	MTCC-B6033_01012	SH-B11_01046	TUAT1_01027
acpA		Acyl carrier protein	6	6	1	2	2354				233	233	233	C4_01437	GR8_02526	HM-7_03750	MTCC-B6033_01617	SH-B11_01634	TUAT1_01564
carA2		zeta-carotene-forming phytoene desaturase	6	6	1	2	1744				1475	1475	1475	C4_00955	GR8_02048	HM-7_03268	MTCC-B6033_01130	SH-B11_01107	TUAT1_01087
group_4734		hypothetical protein	6	6	1	2	3215				479	479	479	C4_02037	GR8_03135	HM-7_00412	MTCC-B6033_02222	SH-B11_02232	TUAT1_02165
cheA		Chemotaxis protein CheA	6	6	1	2	2406				2027	2030	2027	C4_01488	GR8_02577	HM-7_03801	MTCC-B6033_01668	SH-B11_01685	TUAT1_01615
nagZ		Beta-hexosaminidase	6	6	1	2	710				1919	1919	1919	C4_00094	GR8_01186	HM-7_02249	MTCC-B6033_00199	SH-B11_00200	TUAT1_00204
mce3R		Transcriptional repressor Mce3R	6	6	1	2	987				866	866	866	C4_00328	GR8_01422	HM-7_02492	MTCC-B6033_00427	SH-B11_00430	TUAT1_00451
moaC		Cyclic pyranopterin monophosphate synthase	6	6	1	2	1186				491	491	491	C4_00492	GR8_01586	HM-7_02657	MTCC-B6033_00599	SH-B11_00612	TUAT1_00617
dacB		D-alanyl-D-alanine carboxypeptidase DacB	6	6	1	2	3166				1157	1157	1157	C4_01990	GR8_03087	HM-7_00364	MTCC-B6033_02174	SH-B11_02184	TUAT1_02117
group_4740		hypothetical protein	6	6	1	2	2166				893	893	893	C4_01258	GR8_02346	HM-7_03571	MTCC-B6033_01436	SH-B11_01455	TUAT1_01386
purE		N5-carboxyaminoimidazole ribonucleotide mutase	6	6	1	2	1243				488	488	488	C4_00533	GR8_01627	HM-7_02848	MTCC-B6033_00647	SH-B11_00671	TUAT1_00666
group_4742		hypothetical protein	6	6	1	2	1430				281	281	281	C4_00686	GR8_01776	HM-7_02997	MTCC-B6033_00807	SH-B11_00836	TUAT1_00815
yisP		Putative phytoene/squalene synthase YisP	6	6	1	2	1745				839	839	839	C4_00956	GR8_02049	HM-7_03269	MTCC-B6033_01131	SH-B11_01108	TUAT1_01088
lytA_1		Membrane-bound protein LytA	6	6	1	2	4460				569	569	569	C4_03148	GR8_00471	HM-7_01543	MTCC-B6033_03358	SH-B11_03424	TUAT1_03343
fadH		putative 2,4-dienoyl-CoA reductase	6	6	1	2	2156				764	764	764	C4_01248	GR8_02336	HM-7_03561	MTCC-B6033_01426	SH-B11_01445	TUAT1_01376
ypeB		Sporulation protein YpeB	6	6	1	2	3139				1349	1349	1349	C4_01964	GR8_03061	HM-7_00337	MTCC-B6033_02148	SH-B11_02158	TUAT1_02091
safA		SpoIVD-associated factor A	6	6	1	2	5368				1190	1208	1198	C4_02371	GR8_03468	HM-7_00754	MTCC-B6033_02560	SH-B11_02632	TUAT1_02505
proC_3		Pyrroline-5-carboxylate reductase	6	6	1	2	3227				827	827	827	C4_02047	GR8_03145	HM-7_00422	MTCC-B6033_02234	SH-B11_02242	TUAT1_02175
pth		Peptidyl-tRNA hydrolase	6	6	1	2	3791				566	566	566	C4_03730	GR8_01054	HM-7_02116	MTCC-B6033_00066	SH-B11_00068	TUAT1_00066
mraZ		Transcriptional regulator MraZ	6	6	1	2	2269				437	455	452	C4_01353	GR8_02442	HM-7_03666	MTCC-B6033_01533	SH-B11_01550	TUAT1_01481
mtlR		Transcriptional regulator MtlR	6	6	1	2	1026				2087	2087	2087	C4_00362	GR8_01456	HM-7_02526	MTCC-B6033_00460	SH-B11_00470	TUAT1_00485
estB		Esterase EstB	6	6	1	2	711				1355	1355	1355	C4_00095	GR8_01187	HM-7_02250	MTCC-B6033_00200	SH-B11_00201	TUAT1_00205
group_4752		hypothetical protein	6	6	1	2	3022				635	635	635	C4_01852	GR8_02949	HM-7_00226	MTCC-B6033_02037	SH-B11_02044	TUAT1_01976
group_4753		hypothetical protein	6	6	1	2	3073				236	236	236	C4_01898	GR8_02996	HM-7_00272	MTCC-B6033_02083	SH-B11_02093	TUAT1_02025
purM		Phosphoribosylformylglycinamidine cyclo-ligase	6	6	1	2	1251				1040	1040	1040	C4_00541	GR8_01635	HM-7_02856	MTCC-B6033_00655	SH-B11_00679	TUAT1_00674
sinR_1		HTH-type transcriptional regulator SinR	6	6	1	2	3764				233	233	233	C4_03759	GR8_01083	HM-7_02145	MTCC-B6033_00096	SH-B11_00097	TUAT1_00095
group_4756		Ribonuclease	6	6	1	2	4558				488	488	488	C4_03052	GR8_00374	HM-7_01446	MTCC-B6033_03263	SH-B11_03329	TUAT1_03247
[truncated: 3,577 more rows]
