# Supplementary material for: Comparative genomic analyses reveal genetic characteristics and pathogenic factors of Bacillus pumilus HM-7
Source: Front Microbiol. 2022 Nov 7;13:1008648. doi: 10.3389/fmicb.2022.1008648 (PMC9677121; doi:10.3389/fmicb.2022.1008648)
Supplement: Supplementary Table 3 — CAZymes categories identification in HM-7 using the CAZymes database. [file Table_3.xlsx]

## Sheet: HM-7.CAZymes.anno
Table S3 CAZymes categories identification in HM-7 using the CAZymes database.
Gene_ID	CAZymes_Terms	Identity(%)	Query Length	Mismatch	Gap	Query Start	Query End	Subject start	Subject end	Evalue	Score
HM-7_00001	CEJ77768.1|GH23	69.29	127	38	1	1	127	415	540	1e-48	169
HM-7_00002	CCG49746.1|GH23	50	214	101	1	1	214	767	974	1e-62	213
HM-7_00003	CDH95362.1|GH23	64.24	151	54	0	2	152	1050	1200	3e-58	198
HM-7_00004	CCG49746.1|GH23	53	100	46	1	1	100	1205	1303	6e-17	79.3
HM-7_00006	CCG49440.1|GH23	68.47	704	206	6	1	692	1504	2203	0	886
HM-7_00008	CDG30116.1|GH0	58.53	721	292	5	6	723	3	719	0	820
HM-7_00010	AGE60867.1|GH0	33.05	354	220	11	89	433	64	409	3e-46	174
HM-7_00011	BAD74834.1|CBM50	33.13	163	97	4	5	166	6	157	2e-18	87.4
HM-7_00088	ADG05764.1|CBM50	51.19	84	40	1	131	213	148	231	1e-20	90.1
HM-7_00185	CCG49746.1|GH23	60.47	2231	837	15	1	2200	1	2217	0	2430
HM-7_00187	CDG30116.1|GH0	58.53	721	292	5	6	723	3	719	0	820
HM-7_00189	AGE60867.1|GH0	33.05	354	220	11	89	433	64	409	3e-46	174
HM-7_00190	BAD74834.1|CBM50	33.13	163	97	4	5	166	6	157	2e-18	87.4
HM-7_00240	AHL71799.1|GT28	100	383	0	0	1	383	1	383	0	785
HM-7_00255	AHL71813.1|CE4	96.13	284	11	0	1	284	1	284	0	546
HM-7_00276	AHL71833.1|GT51	100	836	0	0	1	836	1	836	0	1532
HM-7_00289	AHL71845.1|GT4	99.74	381	1	0	1	381	1	381	0	723
HM-7_00290	AHL71846.1|CE14	100	234	0	0	1	234	1	234	6e-170	470
HM-7_00302	ABK44145.1|GT41	24.91	269	195	6	40	305	11	275	3e-11	69.3
HM-7_00338	ADG82982.1|CBM50	62.39	117	44	0	187	303	142	258	7e-49	166
HM-7_00345	AHL71900.1|CBM50	98.29	117	1	1	1	116	1	117	4e-61	196
HM-7_00353	AHL71907.1|CBM50	98.6	215	3	0	1	215	1	215	8e-160	443
HM-7_00356	AAO76290.1|GT2	33.48	230	145	4	362	591	932	1153	1e-24	113
HM-7_00357	AIZ42233.1|GT2	35.11	131	80	2	8	136	2	129	2e-15	77.8
HM-7_00378	AFU57543.1|GT66	48.89	135	53	5	7	128	758	889	9e-22	93.6
HM-7_00380	CDM22846.1|GT51	37.92	414	221	8	27	428	912	1301	8e-71	246
HM-7_00398	ACA88898.1|CBM5	37.38	321	184	8	65	374	89	403	1e-44	167
HM-7_00410	AHL71960.1|CBM63	97.87	235	5	0	1	235	1	235	6e-159	442
HM-7_00431	AHL71983.1|GH1	99.36	468	3	0	1	468	1	468	0	969
HM-7_00436	AID32530.1|GT51	30.71	254	150	8	8	249	804	1043	3e-23	102
HM-7_00438	CBA03971.1|GT30	56.81	389	162	5	3	388	2	387	2e-146	444
HM-7_00446	AEG58461.1|CBM50	40.98	122	57	3	30	151	13	119	9e-23	92.8
HM-7_00448	ACL49294.1|GT4	35.94	217	131	6	1	212	4	217	5e-31	123
HM-7_00450	ABW68399.1|GH23	23.5	200	148	3	56	250	64	263	9e-13	70.9
HM-7_00461	AFM26684.1|CE11	21.89	201	152	1	390	590	160	355	3e-11	70.5
HM-7_00463	BAN02470.1|CBM2	29.71	239	163	3	5	242	108	342	2e-23	101
HM-7_00527	AGK54911.1|CBM50	51.01	296	135	4	78	370	104	392	5e-99	302
HM-7_00538	ACL49294.1|GT4	38.04	163	88	6	29	188	21	173	1e-17	85.5
HM-7_00539	ACL49294.1|GT4	31.13	212	130	7	23	228	4	205	5e-18	87
HM-7_00542	AIF49544.1|CBM50	29.28	222	138	7	67	277	62	275	1e-11	68.6
HM-7_00556	ACL49294.1|GT4	31.58	228	128	7	4	212	3	221	2e-18	87.8
HM-7_00560	CAL53384.1|CE11	26.32	399	268	6	3	380	35	428	2e-41	160
HM-7_00593	CAJ61616.1|CBM13	30.36	336	221	7	1	329	1	330	2e-27	121
HM-7_00599	AGK95561.1|GH73	28.3	212	136	6	183	391	166	364	4e-13	74.3
HM-7_00617	AJF85800.1|CE0	65.84	243	81	2	1	241	1	243	2e-118	340
HM-7_00618	AHL72163.1|CE4	98.78	246	3	0	1	246	1	246	3e-155	434
HM-7_00626	AID32530.1|GT51	31.82	264	153	10	1	251	797	1046	2e-27	114
HM-7_00632	AHL72175.1|CE4	96.8	469	15	0	1	469	1	469	0	913
HM-7_00639	AAO41659.1|CBM14	24.3	214	152	5	9	217	438	646	3e-12	69.3
HM-7_00651	EAA61740.1|AA3	28.87	194	125	6	1	185	4	193	3e-17	84
HM-7_00655	ACX67577.1|CBM32	50	92	45	1	65	155	281	372	3e-21	97.1
HM-7_00671	AJC53641.1|GT2	33.2	241	144	5	2	242	659	882	2e-29	120
HM-7_00676	ACO62070.1|CE0	28.02	364	201	19	3	322	309	655	3e-16	83.6
HM-7_00684	AJC53641.1|GT2	31.17	308	191	5	5	310	662	950	1e-41	157
HM-7_00685	EAA29319.1|GH93	30.4	421	220	14	5	388	42	426	4e-34	138
HM-7_00697	AEE90870.1|GT51	26.75	329	176	16	233	539	309	594	2e-11	70.9
HM-7_00705	AFZ04852.1|GT2	23.58	492	338	10	10	473	593	1074	9e-19	94
HM-7_00712	ACL49294.1|GT4	35.19	216	134	5	1	212	4	217	7e-27	112
HM-7_00713	AFY47546.1|GH1	38.75	160	90	4	104	259	267	422	4e-24	104
HM-7_00720	CAO90694.1|GT41	27.32	205	149	0	2	206	1034	1238	1e-20	93.6
HM-7_00727	CCO19054.1|GT29	28.73	449	259	14	1	414	660	1082	4e-34	139
HM-7_00729	AEH22532.1|CBM50	32.87	216	102	3	354	526	571	786	2e-24	111
HM-7_00754	AHL72282.1|CBM50	95.23	398	17	1	1	398	1	396	6e-169	481
HM-7_00779	ABY40380.1|GH18	42.34	111	64	0	103	213	15	125	1e-22	101
HM-7_00782	AHL72310.1|CBM50	99.03	414	4	0	1	414	1	414	0	634
HM-7_00783	AFY93865.1|GT2	31.36	405	248	10	37	428	2184	2571	2e-48	181
HM-7_00812	AFZ04852.1|GT2	32.35	507	314	11	2	495	584	1074	3e-59	215
HM-7_00837	AHL72365.1|GH51	98.98	492	5	0	1	492	1	492	0	1025
HM-7_00842	AFZ04852.1|GT2	26.23	549	344	12	23	559	583	1082	5e-29	126
HM-7_00864	CAN65674.1|GH28	43.95	562	285	7	60	618	95	629	5e-145	456
HM-7_00877	AAO76290.1|GT2	31.75	274	160	6	318	577	887	1147	1e-27	122
HM-7_00878	ABS01822.1|GT2	42.75	131	69	2	3	131	17	143	2e-22	99
HM-7_00911	CAL53384.1|CE11	28.33	360	239	5	6	347	38	396	2e-40	159
HM-7_00916	ABS01822.1|GT2	31.62	117	77	1	5	118	20	136	2e-13	72.8
HM-7_00917	AAO76290.1|GT2	27.39	241	155	9	96	323	915	1148	2e-13	75.5
HM-7_00920	ACL49294.1|GT4	35.48	248	151	3	3	250	4	242	6e-46	165
HM-7_00927	AFZ04852.1|GT2	25.83	480	326	13	42	511	610	1069	7e-28	122
HM-7_00944	AFZ04852.1|GT2	25.55	501	336	13	68	559	604	1076	2e-24	112
HM-7_00948	AGT25470.1|GH32	24.85	334	242	6	2	330	480	809	3e-22	101
HM-7_00953	AEI12495.1|GT28	30.38	395	252	8	5	377	431	824	5e-44	168
HM-7_00964	EFG35513.1|GT30	36.21	174	103	4	28	197	454	623	6e-28	114
HM-7_00984	AHF92902.1|GH0	23.36	274	170	7	64	330	78	318	9e-14	76.3
HM-7_00986	AHL72513.1|GH105	98.11	370	7	0	1	370	1	370	0	762
HM-7_00995	ADY37157.1|PL10	24.37	316	214	6	7	298	412	726	7e-25	108
HM-7_00996	AHO18837.1|GH13	50.59	85	39	2	1	83	1	84	1e-16	88.2
HM-7_01001	ACL49294.1|GT4	39.8	201	121	0	23	223	19	219	3e-43	157
HM-7_01003	AJC53641.1|GT2	27.27	187	131	4	14	197	671	855	8e-13	72.4
HM-7_01014	AEA24083.1|GT4	29.44	642	406	16	1	609	403	1030	1e-85	292
HM-7_01020	AHL72547.1|GT2	98.4	375	6	0	1	375	1	375	0	733
HM-7_01024	ACL49294.1|GT4	31.02	187	114	3	20	194	18	201	4e-19	90.1
HM-7_01045	AFZ04852.1|GT2	25.1	482	341	9	14	477	597	1076	3e-25	113
HM-7_01081	ADB31951.1|GT28	32.78	363	212	12	18	369	42	383	7e-42	159
HM-7_01082	ADB31951.1|GT28	36.9	355	223	1	13	366	33	387	2e-46	172
HM-7_01091	BAI86938.1|CBM50	54.95	313	100	4	1	272	1	313	8e-113	330
HM-7_01106	CEJ97518.1|GH73	26.73	318	207	11	16	326	28	326	1e-25	110
HM-7_01107	AGK88038.1|CBM50	99.1	222	2	0	1	222	1	222	5e-136	383
HM-7_01108	AGK88037.1|GH23	98.89	1264	14	0	1	1264	25	1288	0	2192
HM-7_01162	AAO76290.1|GT2	29.11	237	149	6	194	424	925	1148	1e-13	77.4
HM-7_01167	AHL72664.1|GT51	99.52	622	3	0	1	622	12	633	0	1186
HM-7_01173	AJC53641.1|GT2	26.09	230	141	5	8	221	650	866	3e-16	85.9
HM-7_01216	AEI45401.1|CBM50	44.33	97	50	3	87	182	137	230	3e-16	77.8
HM-7_01242	AFC30128.1|CBM50	46.36	151	73	5	174	319	212	359	4e-21	96.3
HM-7_01247	AET59482.1|CBM50	27.8	482	298	18	5	454	47	510	3e-40	155
HM-7_01263	ABS01822.1|GT2	38.46	117	68	2	6	118	20	136	5e-13	71.2
HM-7_01279	ACL49294.1|GT4	32.86	210	135	3	11	217	11	217	4e-29	121
HM-7_01293	ACL49294.1|GT4	24.62	264	178	5	14	268	16	267	9e-14	74.7
HM-7_01296	ABH65273.1|CE1	29.05	296	179	12	167	452	52	326	3e-21	100
HM-7_01315	AID32530.1|GT51	30.8	250	160	4	5	247	803	1046	3e-34	134
HM-7_01319	AHL72811.1|GH33	98.98	391	4	0	1	391	1	391	0	813
HM-7_01322	CCD02617.1|GH33	43.3	194	108	2	3	195	4	196	1e-41	156
HM-7_01323	AJC53641.1|GT2	33.02	215	133	4	2	216	659	862	8e-27	117
HM-7_01326	AHL72818.1|GH28	98.92	463	5	0	1	463	1	463	0	949
HM-7_01329	AGT25470.1|GH32	27.1	262	151	6	3	242	482	725	2e-21	99
HM-7_01331	AAO76290.1|GT2	27.24	246	159	6	343	577	911	1147	2e-12	74.3
HM-7_01332	ADB74244.1|GT2	34.4	125	78	2	7	128	12	135	4e-14	74.7
HM-7_01341	ADY51174.1|GT2	22.14	429	291	10	121	528	621	1027	5e-15	82.8
HM-7_01342	ACV64175.1|CBM50	43.61	227	125	2	30	255	107	331	1e-62	202
HM-7_01351	AJC53641.1|GT2	28.86	246	142	5	4	227	658	892	5e-18	86.7
HM-7_01359	ACI65301.1|GT49	28.91	256	168	6	158	400	249	503	4e-22	103
HM-7_01383	AJC53641.1|GT2	30.32	221	146	4	5	225	662	874	3e-27	117
HM-7_01391	AJC53641.1|GT2	27.36	201	141	2	10	209	667	863	3e-12	69.7
HM-7_01401	AFM26684.1|CE11	27.31	227	158	3	148	372	138	359	3e-15	82
HM-7_01406	ACL49294.1|GT4	31.73	208	138	4	24	231	16	219	7e-18	86.7
HM-7_01407	ACL49294.1|GT4	29.95	217	141	6	16	232	12	217	3e-19	90.5
HM-7_01411	ACT13277.1|GT2	25	356	252	8	22	375	663	1005	1e-20	97.8
HM-7_01412	AEQ60321.1|GT2	28.57	210	131	5	17	220	10	206	1e-17	84.3
HM-7_01413	AFY54692.1|GT4	59.49	195	79	0	1	195	396	590	1e-74	238
HM-7_01415	ADY55907.1|GT2	33.66	309	197	5	24	329	350	653	6e-54	191
HM-7_01416	AHL72904.1|GT2	99.42	342	2	0	1	342	1	342	0	710
HM-7_01418	AHL72906.1|GT4	97.61	376	9	0	1	376	1	376	0	760
HM-7_01419	AHL72907.1|GT2	96.06	279	11	0	1	279	1	279	0	560
HM-7_01420	ABV63734.1|GT4	85.75	379	54	0	1	379	1	379	0	701
HM-7_01429	AHL72916.1|CE4	99.36	469	3	0	1	469	1	469	0	885
HM-7_01432	AJC53641.1|GT2	29.36	235	148	9	1	235	656	872	7e-16	80.9
HM-7_01436	AHL72923.1|GT1	98.97	389	4	0	1	389	1	389	0	790
HM-7_01453	AIT83212.1|GT4	37.5	296	172	6	21	303	19	314	1e-58	204
HM-7_01454	AGT06905.1|GH23	71.54	130	37	0	327	456	230	359	3e-61	206
HM-7_01469	ACS33574.1|GT2	29.31	232	118	8	6	214	3	211	1e-15	78.2
HM-7_01473	AHL72958.1|CE9	99.49	396	2	0	1	396	1	396	0	816
HM-7_01476	AEW02620.1|CBM13	28.08	292	173	13	925	1184	45	331	2e-19	97.1
HM-7_01487	AGS73729.1|CE14	27.73	339	237	5	13	344	30	367	3e-23	106
HM-7_01489	ABS01822.1|GT2	41.88	117	65	1	8	121	20	136	2e-22	98.6
HM-7_01490	AAO76290.1|GT2	31.73	249	161	4	222	466	913	1156	1e-22	105
HM-7_01491	AHL72976.1|GT0	98.87	707	8	0	1	707	1	707	0	1065
HM-7_01492	AHL72977.1|GT2	99.7	330	1	0	1	330	1	330	0	678
HM-7_01500	BAM46363.1|CBM50	55.96	109	46	1	313	419	33	141	3e-23	101
HM-7_01502	ACL49294.1|GT4	36.87	217	134	3	1	215	4	219	6e-37	139
HM-7_01532	AFM25218.1|GT2	30.45	335	211	6	1	314	2	335	4e-33	134
HM-7_01533	AHL73018.1|GT4	98.49	398	6	0	2	399	1	398	0	824
HM-7_01534	AHL73019.1|GT2	99.2	251	2	0	1	251	1	251	0	523
HM-7_01537	ABA79691.1|GH0	27.43	339	210	8	1	305	316	652	2e-22	100
HM-7_01538	BAI61021.1|GT2	31.82	198	123	5	76	270	40	228	4e-18	90.1
HM-7_01539	AHL73024.1|GT4	98.73	394	5	0	1	394	1	394	0	764
HM-7_01540	AJM76790.1|GT4	26.68	416	285	6	12	417	7	412	6e-30	127
HM-7_01541	AIY66659.1|GT2	45.73	199	94	5	33	217	398	596	7e-48	169
HM-7_01544	AAO35771.1|GH73	33.76	311	198	4	11	313	8	318	4e-37	146
HM-7_01545	CDI49287.1|GH73	33.8	287	187	2	30	313	32	318	1e-38	150
HM-7_01546	CDI49287.1|GH73	34.92	252	151	4	63	304	31	279	1e-32	135
HM-7_01551	AJA56769.1|CBM50	50.21	241	120	0	2	242	5	245	4e-83	269
HM-7_01553	AGN38140.1|GT4	64.29	826	291	2	16	841	16	837	0	1126
HM-7_01554	AHA30703.1|GT2	52.27	375	179	0	381	755	325	699	5e-133	414
HM-7_01555	ABV63882.1|GT4	34.73	311	189	7	29	332	36	339	6e-49	181
HM-7_01557	ABV63884.1|GT26	98.05	256	5	0	1	256	1	256	0	528
HM-7_01558	AIS59503.1|GT2	28.99	307	201	6	86	379	476	778	6e-38	149
HM-7_01559	AHL73045.1|GH73	98.74	876	11	0	1	876	1	876	0	1523
HM-7_01560	CBL10433.1|GH1	48.73	314	151	4	6	316	461	767	1e-99	313
HM-7_01564	EEV37797.1|GH39	37.23	94	59	0	375	468	168	261	1e-12	74.3
HM-7_01569	AET57144.1|GH32	30.58	327	209	8	4	318	2	322	9e-30	123
HM-7_01570	AGT25470.1|GH32	25.75	334	222	11	5	325	478	798	2e-16	84.3
HM-7_01572	EAA62552.1|GH92	28.64	206	130	3	69	257	869	1074	8e-14	74.3
HM-7_01576	AHL73062.1|GT2	99.57	465	2	0	1	465	1	465	0	967
HM-7_01580	AEG15398.1|CBM50	50	118	58	1	162	279	170	286	4e-31	123
HM-7_01588	AGT25470.1|GH32	31.58	247	141	8	3	225	483	725	9e-15	79
HM-7_01589	AIQ31424.1|GH32	29.47	319	187	12	1	288	1	312	8e-18	87
HM-7_01591	AJC53641.1|GT2	30.73	218	141	2	3	220	659	866	2e-28	123
HM-7_01601	ADN36115.1|GT2	30.28	251	152	7	76	323	51	281	1e-22	103
HM-7_01610	AHG90758.1|CE11	54.74	137	61	1	1	136	303	439	7e-49	165
HM-7_01620	AGS73729.1|CE14	25.74	338	234	8	15	343	30	359	5e-12	72
HM-7_01621	AIL63341.1|GH23	31.05	219	129	9	16	217	29	242	3e-11	65.9
HM-7_01623	AJC53641.1|GT2	32.43	222	142	3	8	229	659	872	6e-30	120
HM-7_01626	AAM25264.1|GH23	46	100	50	2	120	219	272	367	3e-15	79.3
HM-7_01644	ADE82754.1|GT2	28.43	306	166	13	70	327	920	1220	5e-19	92
HM-7_01659	AHO16406.1|GH13	59.01	344	140	1	11	353	7	350	3e-138	416
HM-7_01680	AFM26684.1|CE11	36.45	107	68	0	4	110	5	111	2e-17	80.5
HM-7_01696	ACL49294.1|GT4	32.86	213	126	7	342	545	14	218	2e-18	92.8
HM-7_01704	AHL73181.1|GT51	97.97	689	14	0	1	689	1	689	0	1354
HM-7_01714	AHL73201.1|GT2	98.55	758	11	0	1	758	1	758	0	1535
HM-7_01738	AID32530.1|GT51	30.27	261	144	8	6	249	804	1043	7e-24	103
HM-7_01743	BAP79369.1|GT2	36.55	290	170	3	1	276	356	645	3e-55	192
HM-7_01744	AJE49066.1|GH0	30.68	339	204	10	2	313	315	649	2e-39	150
HM-7_01746	AHL73231.1|GT0	98.83	342	4	0	1	342	1	342	0	662
HM-7_01747	AEB25982.1|GT0	50.41	246	121	1	1	245	1	246	5e-85	256
HM-7_01750	CAG74948.1|GT2	29.12	364	231	10	27	384	669	1011	7e-27	116
HM-7_01752	AHL73237.1|GT2	98.83	256	3	0	1	256	1	256	0	531
HM-7_01761	AHL73246.1|GT2	99.27	275	2	0	1	275	1	275	0	567
HM-7_01767	AHL73251.1|GH32	98.76	485	6	0	1	485	1	485	0	973
HM-7_01768	ACV39365.1|GH32	39.96	468	258	9	14	462	16	479	4e-82	275
HM-7_01771	AEE95448.1|GH18	33.56	295	147	11	57	344	79	331	4e-20	100
HM-7_01775	ADB31951.1|GT28	29.76	289	168	8	103	386	122	380	3e-21	99.8
HM-7_01783	ADN17640.1|GT2	55.14	321	142	1	3	321	11	331	1e-117	358
HM-7_01785	CCV66467.1|GH3	39.22	102	62	0	179	280	523	624	2e-15	80.1
HM-7_01787	NP_466072.1|GT0	44.88	127	70	0	9	135	19	145	7e-25	95.9
HM-7_01789	CDS98783.1|GT2	35.62	233	132	5	8	227	254	481	2e-41	152
HM-7_01790	AAQ23684.1|GT2	44.14	222	118	2	1	221	3	219	7e-63	211
HM-7_01803	AJC53641.1|GT2	32.88	222	141	2	4	225	659	872	7e-29	117
HM-7_01805	AIO27559.1|CBM50	24.89	237	158	6	36	254	80	314	1e-12	70.5
HM-7_01810	AJC53641.1|GT2	24.61	256	161	7	227	476	634	863	5e-13	75.5
HM-7_01812	AHL73294.1|PL9	98.74	475	6	0	1	475	1	475	0	958
HM-7_01816	AHL73298.1|GH4	99.55	442	2	0	1	442	1	442	0	903
HM-7_01817	CCO12868.1|GH1	41.58	101	59	0	2	102	10	110	8e-15	72
HM-7_01820	AFV71678.1|GH13	24.94	397	229	19	269	611	281	662	3e-11	70.5
HM-7_01828	AHL73309.1|PL1	99.71	342	1	0	2	343	1	342	0	578
HM-7_01829	AJC53641.1|GT2	33.04	224	135	7	330	549	651	863	2e-20	99.8
HM-7_01833	AJC53641.1|GT2	27.66	235	145	5	1	227	656	873	2e-14	79
HM-7_01837	AJC53641.1|GT2	31.34	217	123	7	35	245	692	888	3e-18	87.8
HM-7_01848	AHL73329.1|CE4	99.3	284	2	0	1	284	1	284	0	591
HM-7_01851	AHL73332.1|GH1	98.53	477	7	0	1	477	1	477	0	979
HM-7_01852	ACU62277.1|GH35	36.41	390	198	9	1	346	3	386	4e-65	225
HM-7_01876	AHL73358.1|GH1	99.36	471	3	0	1	471	1	471	0	976
HM-7_01877	AHA66737.1|GH1	36.84	247	145	5	2	240	4	247	3e-36	148
HM-7_01883	AJC53641.1|GT2	29.73	222	148	4	281	501	659	873	1e-19	96.7
HM-7_01891	ACZ42057.1|CBM32	30.86	175	106	6	445	609	525	694	3e-12	74.3
HM-7_01901	AGK77315.1|GH16	32.14	364	213	13	14	357	58	407	3e-31	134
HM-7_01927	AHL73408.1|GH53	99.75	402	1	0	1	402	1	402	0	822
HM-7_01928	AIZ62065.1|GH42	95.78	688	29	0	1	688	1	688	0	1406
HM-7_01932	AJC53641.1|GT2	35.82	201	123	4	17	215	671	867	7e-30	123
HM-7_01940	ACL49294.1|GT4	34.33	201	130	2	22	221	18	217	3e-35	136
HM-7_01944	AHL73429.1|GH1	99.8	488	1	0	1	488	1	488	0	994
HM-7_01945	AHA66737.1|GH1	33.2	256	163	4	2	250	4	258	1e-31	134
HM-7_01954	AIE81962.1|GH32	24.38	283	212	1	9	289	4	286	3e-19	92.4
HM-7_01964	AHL73451.1|GH1	98.54	478	7	0	1	478	2	479	0	983
HM-7_01965	ACV39365.1|GH32	28.47	439	287	8	5	420	3	437	8e-38	154
HM-7_01984	AJC53641.1|GT2	28.51	235	161	4	290	524	646	873	2e-20	99.8
HM-7_01988	AJC53641.1|GT2	25.88	228	158	3	7	228	664	886	1e-22	101
HM-7_01990	ABH65273.1|CE1	27.97	286	167	9	119	389	65	326	8e-15	80.1
HM-7_01994	AAO76290.1|GT2	31.77	277	159	6	350	605	886	1153	7e-28	123
HM-7_01995	ABS01822.1|GT2	39.17	120	70	1	3	119	17	136	3e-19	89.7
HM-7_02003	CAN80640.1|GT47	42.79	416	234	4	5	417	943	1357	2e-111	359
HM-7_02012	CEK12281.1|CE1	25.93	243	166	7	31	272	53	282	7e-16	79.7
HM-7_02015	AHM67976.1|CE1	41	239	131	5	10	240	21	257	4e-59	191
HM-7_02026	AHL73505.1|AA6	100	222	0	0	1	222	1	222	2e-151	422
HM-7_02030	AJC53641.1|GT2	33.96	212	126	5	18	226	674	874	1e-23	105
HM-7_02034	CCA15473.1|GH72	42.74	365	203	4	6	365	589	952	2e-89	292
HM-7_02069	EAA63677.1|GH95	31.47	429	254	11	30	423	1254	1677	7e-49	182
HM-7_02074	AHL69923.1|GH18	99.08	433	4	0	1	433	1	433	0	880
HM-7_02076	ADO37723.1|GH13	44.37	142	79	0	8	149	489	630	1e-35	133
HM-7_02103	AIY06684.1|CBM50	69.44	108	32	1	292	399	145	251	4e-43	154
HM-7_02136	EFN52293.1|GT96	35.16	256	137	3	27	277	360	591	2e-34	134
HM-7_02171	CDL66477.1|GT4	50.88	114	56	0	44	157	326	439	7e-28	110
HM-7_02173	AFY77766.1|GT2	31.58	133	91	0	100	232	365	497	2e-16	82.4
HM-7_02174	ACZ43481.1|GT2	37.34	474	267	9	3	461	1	459	2e-96	310
HM-7_02186	AIE96983.1|GT90	26.17	447	257	9	752	1151	779	1199	1e-33	145
HM-7_02192	AIA01457.1|CBM13	39.81	211	112	5	1	211	1	196	5e-24	105
HM-7_02217	CAZ34341.1|GT27	31.11	270	156	5	2	241	1426	1695	4e-32	127
HM-7_02224	AJC53641.1|GT2	31.6	231	138	7	15	238	665	882	1e-21	98.2
HM-7_02225	AJC53641.1|GT2	32.62	233	136	8	3	233	659	872	2e-21	97.4
HM-7_02236	CCB93349.1|GH25	32.69	208	107	3	41	230	992	1184	7e-21	94.7
HM-7_02240	AHL70064.1|CE4	99.21	254	2	0	1	254	1	254	2e-178	493
HM-7_02248	CCG44816.1|GH3	65.83	360	118	1	61	415	745	1104	6e-157	474
HM-7_02249	AHL70068.1|GH3	99.2	624	5	0	16	639	16	639	0	1241
HM-7_02250	AFK02523.1|GH3	30.86	405	227	9	49	425	585	964	1e-53	196
HM-7_02251	ACV39365.1|GH32	28.57	483	312	10	4	458	2	479	4e-44	169
HM-7_02253	BAJ80814.1|CE9	41.51	265	152	3	11	274	394	656	3e-42	157
HM-7_02268	AJC53641.1|GT2	34.74	213	134	2	9	220	664	872	1e-30	125
HM-7_02270	ACL49294.1|GT4	43.07	202	115	0	18	219	18	219	3e-33	130
HM-7_02277	AJC53641.1|GT2	27.01	311	203	4	3	306	658	951	5e-33	132
HM-7_02290	AJC53641.1|GT2	27.08	277	179	6	28	287	683	953	1e-19	92.4
HM-7_02295	ADL51184.1|GH39	27.03	111	81	0	8	118	177	287	2e-12	70.9
HM-7_02300	BAN02470.1|CBM2	31.05	248	149	6	39	283	106	334	1e-27	115
HM-7_02304	AFY93865.1|GT2	27.5	440	266	15	4	407	961	1383	6e-22	102
HM-7_02333	ACV39365.1|GH32	26.75	456	312	10	10	444	12	466	3e-31	134
HM-7_02334	AHL70137.1|GH1	99.15	473	4	0	1	473	1	473	0	980
HM-7_02339	AHL70145.1|GH38	99.1	887	8	0	1	887	1	887	0	1798
HM-7_02343	AEE95448.1|GH18	34.53	446	216	14	310	740	68	452	2e-51	199
HM-7_02357	ACX42259.1|CBM12	38.95	267	147	7	121	381	166	422	1e-38	152
HM-7_02362	AFZ04852.1|GT2	24.51	506	351	11	4	495	586	1074	6e-27	119
HM-7_02375	AJC53641.1|GT2	32.69	208	131	3	19	224	672	872	2e-31	125
HM-7_02382	AID32530.1|GT51	28.06	253	158	7	8	249	804	1043	8e-21	95.1
HM-7_02395	ACL49294.1|GT4	36.6	194	122	1	53	246	25	217	6e-29	122
HM-7_02400	EAA63395.1|GH2	27.86	323	194	13	3	290	852	1170	1e-19	94.4
HM-7_02404	AGT25470.1|GH32	23.95	263	186	5	3	258	483	738	2e-15	80.9
HM-7_02405	CAG74948.1|GT2	30.43	368	224	12	89	440	665	1016	2e-31	130
HM-7_02406	CCE22309.1|GT4	26.44	261	158	12	22	277	471	702	6e-14	75.5
HM-7_02433	AHL70232.1|CE7	100	320	0	0	1	320	1	320	0	617
HM-7_02452	ACL49294.1|GT4	38.89	198	114	3	19	210	21	217	4e-30	124
HM-7_02455	ACX49739.1|GH4	29.38	1831	1154	41	1063	2777	11	1818	0	631
HM-7_02456	ACX49739.1|GH4	28.4	1838	1182	33	1043	2769	4	1818	6e-178	614
HM-7_02457	AFZ04852.1|GT2	32.3	1062	637	19	147	1148	270	1309	1e-151	497
HM-7_02458	AFZ04852.1|GT2	37.51	917	499	18	1496	2362	293	1185	5e-170	571
HM-7_02459	AFZ04852.1|GT2	31.03	1231	724	31	1549	2724	270	1430	3e-152	518
HM-7_02460	ABJ85673.1|GT4	30.36	224	131	11	16	225	437	649	4e-17	84
HM-7_02463	AJC53641.1|GT2	30.26	195	128	3	28	216	684	876	5e-23	100
HM-7_02473	ACL49294.1|GT4	34.39	221	137	6	1	218	4	219	9e-29	117
HM-7_02475	AEI15911.1|GH23	26.72	232	153	8	44	265	37	261	3e-15	78.6
HM-7_02477	BAQ30769.1|GH42	31.09	386	262	4	5	388	25	408	2e-47	180
HM-7_02478	AFA48883.1|GH28	31.08	222	116	8	14	233	68	254	2e-17	89
HM-7_02483	ACL49294.1|GT4	34.69	245	135	8	1	232	4	236	2e-29	119
HM-7_02484	EAA63395.1|GH2	30.62	307	189	6	15	303	870	1170	1e-39	154
HM-7_02487	ADV50326.1|GT2	35.51	138	85	3	1	136	1	136	2e-14	75.1
HM-7_02488	AAO76290.1|GT2	31.43	245	140	5	236	469	921	1148	3e-24	110
HM-7_02491	AGS73729.1|CE14	26.92	364	263	2	16	376	29	392	5e-26	115
HM-7_02498	AFY93865.1|GT2	27.05	329	191	10	38	343	2189	2491	7e-18	90.5
HM-7_02522	AEH39117.1|GH93	27.92	154	102	4	6	158	445	590	8e-11	65.5
HM-7_02528	AJK45936.1|GT9	48.91	137	64	3	3	134	10	145	4e-32	125
HM-7_02534	AJC94912.1|GH39	25.73	241	164	5	41	273	26	259	2e-11	67.8
HM-7_02538	AHL70334.1|GH126	99.44	360	2	0	1	360	1	360	0	717
HM-7_02541	AHL70337.1|GT2	99.05	422	4	0	1	422	1	422	0	823
HM-7_02555	ADL58534.1|GT2	30.16	126	83	4	5	128	3	125	3e-11	66.2
HM-7_02556	ACI65301.1|GT49	23.06	412	263	12	36	397	96	503	1e-18	92.4
HM-7_02558	ACI65301.1|GT49	26.89	424	249	11	40	403	96	518	3e-31	130
HM-7_02559	AJC53641.1|GT2	34.13	208	131	4	9	214	662	865	4e-32	129
HM-7_02568	CAL53384.1|CE11	32.36	343	215	3	4	329	37	379	4e-50	187
HM-7_02572	ABM31792.1|GH3	34.11	129	74	3	1	118	1	129	2e-14	71.2
HM-7_02591	AFM26684.1|CE11	23.53	289	192	7	280	548	114	393	5e-12	72.8
HM-7_02601	AHA66737.1|GH1	31.5	273	181	3	2	268	4	276	2e-34	142
HM-7_02602	AAO82730.1|CE0	34.1	261	161	6	2	256	5	260	8e-33	123
HM-7_02604	EAA63396.1|GH76	28.1	331	196	11	33	347	446	750	7e-24	106
HM-7_02606	ABV61158.1|GH16	97.94	243	5	0	1	243	1	243	1e-164	457
HM-7_02608	AGS73729.1|CE14	25.5	302	223	1	45	344	55	356	9e-19	93.6
HM-7_02609	ACX67577.1|CBM32	25.82	306	174	12	25	293	238	527	5e-14	76.3
HM-7_02642	ACI65301.1|GT49	26.08	418	242	12	33	393	96	503	4e-18	90.5
HM-7_02718	CBI44023.1|GH23	49.13	690	308	10	439	1115	486	1145	0	604
HM-7_02719	AIW33208.1|CBM50	68.65	185	54	1	1	181	1	185	2e-69	211
HM-7_02731	CDH94180.1|CBM50	73.49	83	22	0	190	272	61	143	3e-37	131
HM-7_02790	CBI44023.1|GH23	49.13	690	308	10	439	1115	486	1145	0	604
HM-7_02791	AIW33208.1|CBM50	68.65	185	54	1	1	181	1	185	2e-69	211
HM-7_02803	CDH94180.1|CBM50	73.49	83	22	0	190	272	61	143	3e-37	131
HM-7_02821	AHL70463.1|AA0	99.61	509	2	0	1	509	1	509	0	1055
HM-7_02829	AJI15860.1|GH39	28.21	273	178	9	95	364	29	286	1e-13	75.9
HM-7_02885	ACT97502.1|GH78	34.18	158	99	2	908	1063	388	542	1e-15	85.1
HM-7_02899	AHL70538.1|GH4	99.55	442	2	0	1	442	1	442	0	901
HM-7_02907	AJC83565.1|GH0	29.33	341	196	11	10	316	331	660	3e-26	112
HM-7_02908	AHL70547.1|GT0	99.67	303	1	0	1	303	1	303	0	629
HM-7_02909	AHL70548.1|GT2	97.73	396	9	0	1	396	1	396	0	804
HM-7_02910	AHL70549.1|GT0	98.38	309	5	0	1	309	1	309	0	637
HM-7_02912	ABS24074.1|GT51	25.82	368	182	13	315	652	271	577	7e-11	69.3
HM-7_02920	AHL70559.1|GT2	100	357	0	0	1	357	1	357	0	751
HM-7_02926	CAL53384.1|CE11	25.85	352	242	5	22	354	54	405	2e-36	144
HM-7_02933	ADV43483.1|GH33	31.73	208	134	4	51	256	48	249	8e-18	86.3
HM-7_02949	CAZ34341.1|GT27	28.57	266	160	6	3	239	1428	1692	3e-22	99
HM-7_02959	ACV39365.1|GH32	35.07	479	301	7	4	477	5	478	8e-77	261
HM-7_02960	AHL70596.1|GH13	99.65	566	2	0	1	566	1	566	0	1186
HM-7_02963	ACT04544.1|CBM50	48.76	644	310	7	29	658	24	661	0	616
HM-7_02973	CCA23368.1|GH18	35.24	349	210	4	14	355	129	468	2e-30	125
HM-7_02980	AHL70616.1|CE4	98.86	263	3	0	1	263	1	263	0	546
HM-7_03009	AHL70647.1|CE12	99.04	209	2	0	1	209	1	209	8e-143	399
HM-7_03011	AFH60783.1|GH39	31.34	134	88	1	146	275	161	294	2e-13	77.4
HM-7_03013	ACL49294.1|GT4	31.25	224	133	8	333	545	5	218	8e-18	90.9
HM-7_03029	ACY24657.1|GH0	36.21	301	176	4	1	293	1	293	3e-50	171
HM-7_03035	AHL70670.1|GT2	99.69	327	1	0	1	327	1	327	0	665
HM-7_03051	ACL49294.1|GT4	28.71	209	125	5	357	552	20	217	1e-16	87
HM-7_03052	AJC53641.1|GT2	28.07	228	136	5	26	243	673	882	6e-17	85.9
HM-7_03053	ACL49294.1|GT4	32.61	184	121	3	26	209	21	201	5e-19	91.3
HM-7_03058	AFY93865.1|GT2	29.33	416	245	12	36	429	2184	2572	9e-32	132
HM-7_03093	ACL49294.1|GT4	37.06	197	111	3	7	190	5	201	6e-26	109
HM-7_03112	AGS73729.1|CE14	29.43	367	250	4	20	380	29	392	5e-36	147
HM-7_03113	AJD49890.1|AA6	40.15	137	77	1	41	172	62	198	9e-27	103
HM-7_03122	AAO76290.1|GT2	30.3	264	158	8	873	1118	893	1148	9e-16	87
HM-7_03123	CDI50176.1|CBM50	30.87	460	279	13	463	909	47	480	5e-51	193
HM-7_03127	AIQ61472.1|GH65	29.55	220	139	6	2	213	785	996	2e-17	84
HM-7_03148	AHL70759.1|CBM50	99.64	276	1	0	1	276	1	276	1e-158	445
HM-7_03160	BAN02470.1|CBM2	33.48	233	144	4	4	231	108	334	9e-36	136
HM-7_03164	AHL70774.1|CE4	99.65	284	1	0	1	284	1	284	0	582
HM-7_03173	ACL49294.1|GT4	30.8	224	141	4	1	214	1	220	2e-22	102
HM-7_03202	AJC53641.1|GT2	28.9	218	151	1	4	221	659	872	2e-19	90.5
HM-7_03205	EAA63395.1|GH2	32.33	399	239	10	23	393	870	1265	3e-50	185
HM-7_03208	AHL70815.1|GT51	99.86	711	1	0	1	711	1	711	0	1460
HM-7_03215	ACI65301.1|GT49	29.28	321	201	10	115	420	209	518	1e-26	116
HM-7_03219	AFZ04852.1|GT2	25.24	519	344	12	7	511	592	1080	3e-33	138
HM-7_03222	ACA88898.1|CBM5	37.11	318	183	8	75	381	92	403	4e-32	131
HM-7_03226	AJK45936.1|GT9	40.91	132	74	4	3	131	15	145	4e-22	98.6
HM-7_03237	AJC53641.1|GT2	31.03	232	136	8	2	225	659	874	2e-20	94
HM-7_03266	AEA24083.1|GT4	29.69	586	330	20	2	530	403	963	7e-54	202
HM-7_03269	AEO46536.1|GT2	31.03	203	132	6	12	208	414	614	2e-17	85.5
HM-7_03271	EEV37797.1|GH39	29.17	120	82	1	180	296	140	259	7e-12	69.7
HM-7_03274	AFY77766.1|GT2	36.89	122	73	3	57	175	381	501	5e-15	75.5
HM-7_03276	CAZ29297.1|GT7	28.47	281	189	5	171	447	76	348	3e-21	100
HM-7_03297	AIJ25815.1|AA7	27.78	162	114	2	44	203	40	200	7e-15	80.5
HM-7_03302	AFY93865.1|GT2	29.24	301	169	9	11	280	2183	2470	3e-22	102
HM-7_03314	AEE16179.1|GT2	27.33	172	98	3	158	304	152	321	4e-16	81.3
HM-7_03315	AFY93865.1|GT2	29.22	438	263	14	6	410	961	1384	7e-26	114
HM-7_03317	ACL49294.1|GT4	31.44	194	122	5	22	215	19	201	1e-18	90.1
HM-7_03318	AJC53641.1|GT2	27.38	263	165	5	31	281	659	907	6e-17	85.9
HM-7_03327	ACL49294.1|GT4	30.19	212	134	6	6	217	4	201	4e-19	92.4
HM-7_03328	AJC53641.1|GT2	29.65	226	144	5	13	238	662	872	2e-20	95.5
HM-7_03340	AHL70985.1|GH23	99.21	254	2	0	1	254	1	254	0	507
HM-7_03371	AHL71014.1|CE1	98.78	246	3	0	1	246	1	246	0	502
HM-7_03375	AFJ61287.1|GH23	68.57	70	22	0	6	75	2130	2199	3e-25	100
HM-7_03386	AHL71023.1|CE6	95.65	276	12	0	1	276	1	276	0	558
HM-7_03408	ACO62070.1|CE0	31.45	337	224	6	5	334	309	645	5e-36	142
HM-7_03410	ABF44103.1|CBM51	28.03	314	201	12	12	312	496	797	4e-21	100
HM-7_03419	AIZ59826.1|CBM50	90.97	299	27	0	1	299	1	299	0	555
HM-7_03426	ADC49105.1|GT2	33.98	565	324	14	11	571	12	531	6e-68	241
HM-7_03430	ACL49294.1|GT4	34.86	218	130	4	3	213	5	217	7e-33	129
HM-7_03435	AAV54596.1|CE0	26.76	340	197	15	26	325	39	366	2e-15	80.9
HM-7_03441	AID32530.1|GT51	23.11	251	175	4	9	248	801	1044	9e-13	71.6
HM-7_03446	ABH65273.1|CE1	32.77	296	168	12	146	431	52	326	7e-26	114
HM-7_03451	ACL49294.1|GT4	26.35	296	184	8	14	309	11	272	1e-20	96.3
HM-7_03455	ACV05413.1|GT2	32.04	309	186	6	8	297	267	570	4e-38	145
HM-7_03456	ACL49294.1|GT4	32.46	191	125	3	27	217	21	207	4e-19	91.7
HM-7_03463	AGX07948.1|GT19	34.59	159	96	2	186	344	382	532	7e-20	94
HM-7_03474	ADO37723.1|GH13	41.58	101	58	1	1	101	483	582	1e-20	90.9
HM-7_03477	ABA19039.1|CBM5	41.88	234	126	6	27	258	144	369	1e-46	168
HM-7_03479	ABS01822.1|GT2	37.39	115	70	1	7	119	20	134	8e-18	85.1
HM-7_03480	AAO76290.1|GT2	28.99	238	147	7	216	445	922	1145	6e-19	94
HM-7_03491	AFY79958.1|GT2	29.7	266	178	4	531	790	317	579	1e-16	88.2
HM-7_03495	ADU74053.1|CBM42	29.07	258	154	11	3	245	4	247	5e-16	83.2
HM-7_03504	AAO76290.1|GT2	28.63	255	163	9	487	727	905	1154	1e-14	82
HM-7_03505	AGX07948.1|GT19	40	160	88	3	2	158	379	533	4e-33	125
HM-7_03515	AAO76290.1|GT2	26.19	252	178	5	250	496	900	1148	5e-17	88.6
HM-7_03529	ADF38126.1|CBM50	61.67	120	42	1	101	216	114	233	2e-42	146
HM-7_03534	AGT25470.1|GH32	24.84	314	228	5	3	309	483	795	3e-18	89
HM-7_03544	AJK90101.1|CBM50	73.17	123	33	0	143	265	80	202	9e-63	199
HM-7_03546	AAO76290.1|GT2	28.96	259	140	8	370	606	912	1148	1e-13	78.2
HM-7_03554	AIQ24903.1|GH39	23.57	263	185	3	35	291	12	264	8e-17	84.3
HM-7_03559	AJO58034.1|CBM50	68.48	165	51	1	1	165	4	167	2e-77	230
HM-7_03561	AID32530.1|GT51	27.38	263	154	10	2	247	802	1044	3e-16	81.3
HM-7_03574	EAA63395.1|GH2	30.81	357	221	9	9	344	870	1221	5e-32	131
HM-7_03577	CEJ73325.1|GH18	33.15	181	107	5	6	180	7	179	3e-26	107
HM-7_03585	CAP83076.1|GH13	35.2	125	81	0	7	131	616	740	1e-16	79.7
HM-7_03590	ACL49294.1|GT4	43	200	113	1	20	218	20	219	8e-45	161
HM-7_03602	AAO76290.1|GT2	29.03	248	156	10	187	423	910	1148	3e-18	91.3
HM-7_03636	ADB31951.1|GT28	34.17	357	211	10	1	350	24	363	1e-37	148
HM-7_03648	AHN21350.1|CBM50	40.69	145	80	4	207	345	58	202	2e-23	99.8
HM-7_03669	ACP24901.1|GT51	30.43	230	130	8	264	489	434	637	1e-12	75.5
HM-7_03670	ACZ19288.1|GT51	29.62	341	188	13	213	551	297	587	2e-17	90.5
HM-7_03675	ADB31951.1|GT28	36.42	335	212	1	19	352	52	386	3e-46	171
HM-7_03676	AHL71309.1|GT28	99.45	364	2	0	1	364	1	364	0	734
HM-7_03684	ACZ86433.1|CBM57	38.4	500	265	15	52	542	36	501	6e-81	295
HM-7_03694	AJC53641.1|GT2	29.09	220	136	6	6	222	662	864	2e-13	73.6
HM-7_03696	AAZ55152.1|AA0	31.56	244	149	7	31	274	12	237	1e-23	99.4
HM-7_03727	CAZ29389.1|GH99	36.56	186	110	2	7	184	6	191	3e-34	131
HM-7_03736	AEB47390.1|CBM2	36.22	254	150	4	10	256	15	263	4e-50	187
HM-7_03748	AFY93865.1|GT2	29.61	304	177	12	3	287	1508	1793	2e-27	116
HM-7_03749	AID32530.1|GT51	28.68	265	142	9	3	243	802	1043	4e-21	95.5
HM-7_03791	AAO76290.1|GT2	42.53	87	50	0	33	119	1249	1335	3e-15	73.9
HM-7_03817	AAF15367.1|GH9	99.68	616	2	0	1	616	44	659	0	1212
HM-7_03818	AHL71450.1|GH48	99.43	702	4	0	1	702	1	702	0	1451
HM-7_03819	AHL71451.1|GH10	98.53	408	6	0	1	408	1	408	0	836
HM-7_03820	AHL71452.1|GH5	99.2	376	3	0	1	376	1	376	0	777
HM-7_03829	AEE54321.1|GT2	37.02	289	175	5	20	304	16	301	3e-54	190
HM-7_03832	AHL71464.1|CE4	99.37	317	2	0	1	317	1	317	0	625
HM-7_03840	CCD02617.1|GH33	32.39	213	141	2	9	219	10	221	1e-26	112
HM-7_03852	AID32530.1|GT51	30.08	246	151	8	6	239	807	1043	1e-21	96.7
HM-7_03862	ACT97502.1|GH78	27.11	166	118	1	850	1012	373	538	2e-13	78.2
HM-7_03863	CCQ75502.1|GT2	27.14	339	215	10	24	351	324	641	7e-20	94.4
HM-7_03876	AEE95448.1|GH18	32.68	306	163	11	141	441	170	437	3e-26	115
HM-7_03892	AGX02008.1|CBM50	59.46	185	75	0	1	185	1	185	7e-81	245
HM-7_03897	ADX07321.1|GH5	27.54	403	255	11	7	385	532	921	8e-33	135
HM-7_03934	CCF62482.1|GT4	21.58	431	301	11	37	453	447	854	9e-23	108
HM-7_03935	CAC47733.1|GH19	30.29	208	114	8	89	276	412	608	3e-16	82.8
HM-7_03936	AJE96745.1|GT0	63.93	657	215	5	1	636	1	656	0	729
HM-7_03970	ACE89831.1|GT2	40	100	55	3	85	179	374	473	1e-12	68.9
HM-7_03988	AFM42793.1|AA1	55.74	296	129	2	1	295	1	295	1e-126	366
HM-7_03994	AHL71618.1|GH1	99.18	488	4	0	1	488	1	488	0	1010
HM-7_03995	ACV39365.1|GH32	28.94	508	326	12	1	486	1	495	2e-52	197
HM-7_03998	AAO76290.1|GT2	24.39	246	165	10	228	466	917	1148	3e-14	79.3
HM-7_03999	AIM60097.1|GT2	43.68	87	49	0	32	118	26	112	3e-14	74.7
HM-7_04000	AHL71624.1|GH30	99.76	420	1	0	1	420	2	421	0	873
HM-7_04001	AHL71625.1|GH43	99.42	514	3	0	1	514	1	514	0	905
HM-7_04003	AHL71627.1|GH4	99.77	443	1	0	1	443	1	443	0	926
HM-7_04007	AIJ21817.1|GT2	29.05	179	118	4	162	338	134	305	6e-12	69.3
HM-7_04011	AFV71678.1|GH13	32.09	402	249	7	284	674	302	690	7e-54	200
HM-7_04020	AGS73729.1|CE14	30.51	295	202	2	19	310	30	324	8e-28	121
HM-7_04033	AFZ04852.1|GT2	23.38	509	344	11	110	610	604	1074	3e-18	93.2
HM-7_04039	AFY93865.1|GT2	29.49	373	230	15	184	531	475	839	6e-24	110
HM-7_04041	AJI33836.1|GH0	51.49	503	231	7	9	503	12	509	0	543
HM-7_04047	AII07899.1|AA4	29.04	303	175	11	9	282	20	311	2e-19	94.4
HM-7_04060	AEF84575.1|GT2	44.44	144	71	2	30	170	426	563	2e-33	127
HM-7_04063	AHL71685.1|CE8	99.69	326	1	0	1	326	1	326	0	615
HM-7_04073	ACL49294.1|GT4	29.13	206	130	6	348	544	19	217	7e-16	84.7
HM-7_04074	ACL49294.1|GT4	26.73	217	135	6	376	579	14	219	6e-16	85.1
HM-7_04082	AHL71704.1|GH11	100	228	0	0	1	228	1	228	1e-171	474
HM-7_04086	CAA29235.1|GH43	98.5	535	8	0	1	535	1	535	0	1107
HM-7_04087	AJC46896.1|GH43	35.21	284	174	4	9	285	14	294	1e-35	144
HM-7_04100	AHL71722.1|GH23	100	220	0	0	1	220	1	220	6e-153	426
HM-7_04107	AHL71728.1|CBM50	100	263	0	0	1	263	1	263	1e-161	451
HM-7_04123	AHL71742.1|CBM50	99.77	443	1	0	1	443	1	443	0	563
HM-7_04127	AHL71745.1|CE14	99.55	221	1	0	1	221	1	221	4e-154	429
HM-7_04128	ADU50674.1|CE14	37.93	116	65	2	1	116	1	109	1e-19	85.9
HM-7_04149	AFM26684.1|CE11	27.23	213	146	4	171	380	160	366	5e-14	78.2
HM-7_04150	AHL71767.1|GT2	96.74	429	14	0	1	429	3	431	0	872
HM-7_04154	ACA46895.1|GT0	25.96	235	164	5	1	234	1	226	4e-17	83.6
HM-7_04212	ADG05764.1|CBM50	51.19	84	40	1	131	213	148	231	1e-20	90.1
