# Supplementary material for: Comparative genomic analyses reveal genetic characteristics and pathogenic factors of Bacillus pumilus HM-7
Source: Front Microbiol. 2022 Nov 7;13:1008648. doi: 10.3389/fmicb.2022.1008648 (PMC9677121; doi:10.3389/fmicb.2022.1008648)
Supplement: Supplementary Table 4 — Virulence-related factor identification in HM-7 using the VFDB database. [file Table_4.xlsx]

## Sheet: HM-7.vfdb.anno
Table S4 Virulence-related factor identification in HM-7 using the VFDB database.
Gene_ID	VFDB_internal_id	VF_name	Identity(%)	Query Length	Mismatch	Gap	Query Start	Query End	Subject start	Subject end	Evalue	Score
HM-7_00006	VFG042906	colonization factor Citrobacter	27.48	131	84	3	57	180	176	302	2e-13	72.8
HM-7_00010	VFG043465	PfbA	26.67	285	172	9	79	332	151	429	2e-14	76.3
HM-7_00185	VFG041578	T3SS	44.26	122	66	2	1416	1535	50	171	5e-24	102
HM-7_00189	VFG043465	PfbA	26.67	285	172	9	79	332	151	429	2e-14	76.3
HM-7_00212	VFG012005	O-linked flagellar glycosylation	41.57	166	86	3	2	164	136	293	4e-35	125
HM-7_00213	VFG037104	Methionine sulphoxide reductase	58.78	131	53	1	10	139	398	528	1e-47	160
HM-7_00214	VFG037116	Methionine sulphoxide reductase	37.16	148	91	1	10	157	203	348	4e-28	108
HM-7_00225	VFG000116	Alginate	28.51	221	119	7	20	202	158	377	5e-16	78.2
HM-7_00226	VFG016235	Hemolysin III	81.9	210	38	0	1	210	1	210	3e-104	299
HM-7_00255	VFG033025	PgdA	35.2	196	109	6	85	277	264	444	2e-27	110
HM-7_00284	VFG009317	Pantothenate synthesis	55.28	123	54	1	9	131	1	122	5e-47	148
HM-7_00285	VFG009305	Pantothenate synthesis	40.85	284	163	4	1	283	14	293	7e-60	192
HM-7_00289	VFG038034	Capsule	25.29	340	213	11	14	339	12	324	2e-16	79.7
HM-7_00305	VFG044377	thioquinolobactin	29.39	330	210	8	29	350	28	342	1e-28	114
HM-7_00310	VFG009360	Tryptophan synthesis	35.8	338	203	6	3	329	26	360	9e-44	154
HM-7_00311	VFG026700	Mycobactin	36.4	489	285	10	17	490	21	498	7e-79	255
HM-7_00315	VFG043411	peritrichous flagella	48.82	254	128	2	4	256	7	259	2e-89	265
HM-7_00316	VFG031465	Nucleoside diphosphate kinase	53.73	134	61	1	2	134	3	136	4e-50	156
HM-7_00321	VFG041115	TSS-1	32.98	188	124	2	1	187	23	209	6e-33	117
HM-7_00322	VFG043551	histone-like protein	45.05	91	50	0	1	91	1	91	5e-18	74.3
HM-7_00355	VFG009751	Sigma E	29.87	154	103	4	13	165	100	249	2e-15	71.6
HM-7_00356	VFG031721	SenX3	35.16	256	148	4	339	586	133	378	5e-35	136
HM-7_00357	VFG031738	RegX3	38.1	231	139	2	6	236	1	227	4e-55	176
HM-7_00364	VFG038250	PbpG	33.18	214	125	6	33	235	8	214	8e-20	87.8
HM-7_00366	VFG043456	Fibronectin-binding protein	36.87	179	102	4	12	185	7	179	3e-31	112
HM-7_00378	VFG041304	Dot/Icm	47.89	142	57	3	2	128	22	161	8e-20	80.9
HM-7_00380	VFG026398	Lysine synthesis	44.73	427	225	4	15	433	27	450	7e-116	347
HM-7_00388	VFG026991	Sigma F	36.28	226	139	3	31	251	16	241	9e-39	135
HM-7_00391	VFG038250	PbpG	28.86	246	161	7	42	281	10	247	2e-20	89.7
HM-7_00394	VFG012274	Type I fimbriae	32.3	161	105	3	133	291	27	185	2e-18	81.3
HM-7_00396	VFG000478	Fur	35.51	138	84	2	12	147	8	142	5e-15	67.4
HM-7_00398	VFG002177	Cytolysin	29.02	255	131	7	124	339	133	376	6e-15	75.5
HM-7_00420	VFG038839	Polar flagella	38.66	194	108	4	2	187	3	193	1e-32	119
HM-7_00422	VFG022639	Proline synthesis	31.12	286	173	6	1	266	1	282	1e-35	128
HM-7_00436	VFG038840	Polar flagella	34.98	243	151	4	8	250	6	241	8e-40	138
HM-7_00442	VFG043210	peritrichous flagella	27.33	150	104	3	4	150	17	164	4e-16	70.9
HM-7_00448	VFG006259	ABC transporter	39.24	237	140	4	2	236	5	239	3e-46	157
HM-7_00449	VFG002901	O-antigen	30.37	214	131	5	14	213	9	218	1e-15	73.2
HM-7_00450	VFG043047	peritrichous flagella	31.84	223	143	7	35	251	42	261	5e-23	94.4
HM-7_00455	VFG016502	PDH-B	46.44	323	170	3	4	326	6	325	4e-103	305
HM-7_00461	VFG043148	lateral flagella	43.15	336	173	6	348	679	105	426	2e-69	233
HM-7_00467	VFG043408	peritrichous flagella	31.15	122	81	1	5	126	4	122	3e-16	73.2
HM-7_00469	VFG037134	Recombinational repair protein	29.91	585	363	12	1	571	1	552	5e-80	261
HM-7_00471	VFG012175	Hemolysin	58.33	240	99	1	5	244	2	240	9e-104	303
HM-7_00498	VFG006777	Lipoate protein ligase A1	26.64	274	167	8	8	278	3	245	2e-18	83.2
HM-7_00517	VFG040986	gsp	23.16	354	248	6	7	346	61	404	4e-18	84.3
HM-7_00518	VFG012898	T2SS	43.01	272	153	2	11	281	124	394	2e-68	221
HM-7_00538	VFG013573	Haemophilus iron transport locus	29.08	251	154	9	14	259	4	235	6e-28	109
HM-7_00539	VFG013572	Haemophilus iron transport locus	32.52	246	153	7	23	265	11	246	9e-32	120
HM-7_00545	VFG001867	SodB	52.33	193	83	3	1	192	5	189	4e-68	206
HM-7_00555	VFG037066	Manganese transport system	29.5	261	175	2	1	259	7	260	3e-16	77
HM-7_00556	VFG044077	direct heme uptake system	34.95	206	127	5	5	206	1	203	3e-30	113
HM-7_00563	VFG039689	T4SS effectors	37.23	94	59	0	139	232	3	96	9e-16	72.4
HM-7_00566	VFG026980	Sigma A	62.38	303	83	1	102	373	22	324	1e-132	382
HM-7_00586	VFG039546	T4SS effectors	37.42	155	80	2	2	148	4	149	2e-28	102
HM-7_00590	VFG045607	Dot/Icm	31.51	219	141	2	27	245	28	237	4e-31	115
HM-7_00593	VFG043573	MOMP	63.28	591	192	5	2	568	8	597	0	676
HM-7_00596	VFG013629	Heme biosynthesis	33.16	392	229	11	5	376	15	393	7e-58	193
HM-7_00597	VFG016484	EF-Tu	29.13	254	148	9	6	237	4	247	5e-18	86.3
HM-7_00606	VFG043478	Fibronectin-binding protein	44.44	72	39	1	95	165	42	113	3e-13	62.8
HM-7_00618	VFG033024	PdgA	32.98	188	118	3	46	233	266	445	1e-19	87
HM-7_00620	VFG043648	type IV pili	24.9	253	140	6	21	223	66	318	3e-17	79
HM-7_00626	VFG038840	Polar flagella	41.04	251	139	4	2	251	1	243	2e-57	183
HM-7_00632	VFG033055	PdgA	45.56	180	98	0	276	455	263	442	1e-49	176
HM-7_00639	VFG026227	Capsule I	29.38	211	134	4	12	220	41	238	2e-19	85.9
HM-7_00643	VFG044370	thioquinolobactin	25.13	390	253	13	23	394	39	407	7e-11	63.9
HM-7_00670	VFG044398	Pyridine-2,6-dithiocarboxylic acid	24.92	317	219	11	49	360	183	485	3e-18	85.9
HM-7_00671	VFG013571	Haemophilus iron transport locus	33.75	240	154	3	1	239	6	241	6e-40	140
HM-7_00672	VFG041139	T6SS	23.08	234	164	7	35	264	38	259	7e-12	63.9
HM-7_00673	VFG002901	O-antigen	27.91	215	139	5	21	226	15	222	2e-16	75.1
HM-7_00674	VFG002901	O-antigen	30.84	214	146	1	16	229	9	220	3e-24	96.3
HM-7_00678	VFG038840	Polar flagella	32.62	233	149	3	1	229	1	229	1e-34	124
HM-7_00679	VFG006719	Listeria adhesion protein	33.03	333	187	7	36	338	486	812	2e-43	161
HM-7_00681	VFG044083	pyoverdine	24.83	302	207	7	1	293	11	301	5e-14	71.2
HM-7_00682	VFG005725	Streptolysin S	26.92	130	93	2	213	341	211	339	2e-12	67.4
HM-7_00684	VFG007914	PDIM	33.23	316	198	3	4	313	10	318	3e-57	187
HM-7_00685	VFG030304	MymA operon	32.04	206	123	6	46	240	30	229	6e-13	69.3
HM-7_00692	VFG044254	staphyloferrin B	31.44	299	198	5	5	298	9	305	3e-37	134
HM-7_00705	VFG030402	MymA operon	26	500	337	14	9	480	11	505	1e-40	152
HM-7_00711	VFG044071	HasA-type hemophore-mediated heme uptake system	27.85	298	178	12	58	337	60	338	9e-15	74.3
HM-7_00712	VFG036559	ABC transporter	38.96	231	139	2	7	236	10	239	3e-44	151
HM-7_00713	VFG011639	PEB1/CBF1	37.04	270	154	8	4	266	1	261	8e-44	149
HM-7_00714	VFG002901	O-antigen	27.31	216	144	4	12	215	7	221	5e-14	68.6
HM-7_00725	VFG044389	Pyridine-2,6-dithiocarboxylic acid	40	95	55	1	2	94	18	112	7e-11	61.6
HM-7_00729	VFG012147	Enterotoxin	26.87	294	198	8	42	325	342	628	2e-19	91.3
HM-7_00731	VFG022971		44.72	729	382	8	17	736	75	791	0	647
HM-7_00769	VFG014624	Flagella	29.05	241	143	9	22	247	27	254	1e-16	77.4
HM-7_00777	VFG042843	type IV pili	31.02	245	159	5	2	239	3	244	8e-28	106
HM-7_00783	VFG013203	Heme biosynthesis	56.03	423	184	2	8	428	4	426	1e-173	492
HM-7_00784	VFG013197	Heme biosynthesis	48.91	321	159	3	6	321	13	333	7e-104	307
HM-7_00786	VFG013198	Heme biosynthesis	49.45	271	135	2	2	272	5	273	6e-86	260
HM-7_00788	VFG013196	Heme biosynthesis	33.5	412	245	5	6	393	1	407	1e-63	211
HM-7_00797	VFG005550	Trigger factor	49.65	423	209	4	1	421	1	421	2e-128	377
HM-7_00799	VFG009376	Leucine synthesis	44	200	98	4	1	196	1	190	6e-49	157
HM-7_00811	VFG014855	Alginate biosynthesis	24.57	289	199	5	120	390	38	325	8e-30	119
HM-7_00812	VFG032812	D-alanine-polyphosphoribitol ligase	48.61	504	252	3	3	499	10	513	5e-175	502
HM-7_00819	VFG013265	LOS	42.41	191	107	3	5	193	6	195	4e-32	114
HM-7_00826	VFG037478	Heme utilization	23.3	206	149	2	1	197	16	221	2e-12	66.2
HM-7_00842	VFG030400	MymA operon	32.06	499	287	14	70	556	4	462	5e-72	238
HM-7_00872	VFG005359	Streptococcal plasmin receptor/GAPDH	47.9	334	164	5	1	329	1	329	8e-97	290
HM-7_00877	VFG031685	SenX3	35.06	328	200	7	252	578	61	376	5e-51	182
HM-7_00878	VFG031747	RegX3	44.64	233	120	2	4	236	3	226	7e-66	203
HM-7_00898	VFG038840	Polar flagella	32.79	247	152	5	50	293	9	244	1e-28	110
HM-7_00913	VFG042241	T3SS	25.7	214	134	8	169	366	278	482	4e-11	64.3
HM-7_00914	VFG010912	LetA/LetS two component	31.82	198	124	3	1	187	1	198	6e-27	102
HM-7_00916	VFG006820	VirR/VirS	48.43	223	114	1	1	222	1	223	7e-76	228
HM-7_00917	VFG032600	VirR/VirS	31.99	272	173	4	69	332	77	344	3e-34	128
HM-7_00920	VFG030684	Trehalose-recycling ABC transporter	32.56	215	135	4	8	221	8	213	5e-36	131
HM-7_00927	VFG030388	MymA operon	27.69	484	317	13	39	511	27	488	7e-48	173
HM-7_00944	VFG030387	MymA operon	28.04	510	333	13	57	558	20	503	1e-46	171
HM-7_00948	VFG002197	BopD	29.19	346	210	9	4	331	3	331	4e-41	146
HM-7_00949	VFG013469	LOS	29.55	220	126	8	160	359	63	273	9e-20	87.8
HM-7_00954	VFG018161	Type VII secretion system	34.25	219	135	5	569	780	633	849	9e-26	114
HM-7_00970	VFG044286	Proteobactin	37.34	316	179	9	4	310	2	307	1e-41	147
HM-7_00993	VFG030623	Trehalose-recycling ABC transporter	29	269	172	6	29	292	21	275	6e-26	103
HM-7_01001	VFG036559	ABC transporter	40.64	187	109	1	23	209	18	202	1e-37	134
HM-7_01003	VFG008680	PDIM	28.25	223	143	7	4	215	10	226	5e-18	82.4
HM-7_01013	VFG045340	RicA	42.17	166	94	1	2	165	3	168	6e-37	125
HM-7_01014	VFG041722	T3SS	31.4	656	395	17	1	608	1	649	6e-99	316
HM-7_01024	VFG006259	ABC transporter	36.48	233	133	4	4	225	5	233	1e-41	145
HM-7_01032	VFG006374	Neutrophil-activating protein	35.37	147	86	3	4	145	2	144	3e-25	93.6
HM-7_01035	VFG018241	AI-2	40.69	145	82	2	1	142	1	144	1e-33	116
HM-7_01038	VFG005227	Laminin-binding protein	30.21	288	181	4	37	323	33	301	3e-38	137
HM-7_01045	VFG030405	MymA operon	34.47	499	303	11	1	478	1	496	3e-86	273
HM-7_01049	VFG016150	Pyochelin	37.15	463	258	10	20	470	20	461	2e-93	291
HM-7_01086	VFG006720	Listeria adhesion protein	33.24	373	217	9	37	380	479	848	7e-47	171
HM-7_01091	VFG012148	Enterotoxin	36.3	146	86	3	21	159	88	233	3e-20	89.7
HM-7_01138	VFG043040	peritrichous flagella	31.83	311	170	6	304	614	215	483	4e-26	112
HM-7_01139	VFG015639	Type IV pili twitching motility related proteins	29.97	357	215	5	305	658	355	679	1e-21	99.8
HM-7_01140	VFG015639	Type IV pili twitching motility related proteins	32.51	323	176	9	318	616	365	669	1e-26	115
HM-7_01141	VFG015639	Type IV pili twitching motility related proteins	29.18	353	221	4	310	662	356	679	3e-23	104
HM-7_01146	VFG012165	Hemolysin	34.92	295	183	4	114	406	117	404	2e-53	184
HM-7_01153	VFG031960	Listeria adhesion protein	27.05	281	180	8	31	295	484	755	4e-16	80.1
HM-7_01154	VFG006720	Listeria adhesion protein	28.57	357	194	13	49	363	501	838	3e-17	83.6
HM-7_01162	VFG038761	Polar flagella	25.62	242	163	6	190	424	101	332	9e-23	98.6
HM-7_01166	VFG044257	staphyloferrin B	35.82	134	85	1	3	136	13	145	4e-15	76.3
HM-7_01170	VFG038762	Polar flagella	22.55	337	217	10	216	528	20	336	4e-11	64.3
HM-7_01171	VFG019760	Type IV pili biosynthesis	39.32	117	65	2	3	117	4	116	1e-15	75.1
HM-7_01173	VFG044172	Chu	27.52	258	174	5	2	252	9	260	6e-23	98.2
HM-7_01186	VFG010912	LetA/LetS two component	27.65	217	145	4	1	213	1	209	4e-19	82
HM-7_01187	VFG042241	T3SS	28.02	207	139	6	566	770	285	483	8e-16	80.9
HM-7_01206	VFG018161	Type VII secretion system	38.67	1311	737	16	208	1480	198	1479	0	877
HM-7_01207	VFG018148	Type VII secretion system	21.09	294	226	4	80	371	90	379	2e-13	71.6
HM-7_01209	VFG002405	Type VII secretion system	30.77	91	63	0	3	93	2	92	3e-14	62.4
HM-7_01237	VFG015888	Phytotoxin phaseolotoxin	26.32	228	164	2	1	227	1	225	1e-14	71.2
HM-7_01247	VFG002420	AdsA	22.25	364	241	14	7	336	151	506	5e-16	80.5
HM-7_01256	VFG016171	Achromobactin biosynthesis and transport	46.38	345	182	2	1	344	1	343	1e-80	249
HM-7_01257	VFG016168	achromobactin	49.69	322	161	1	17	337	8	329	5e-81	249
HM-7_01258	VFG044253	staphyloferrin B	55.37	307	127	6	21	317	21	327	5e-115	335
HM-7_01260	VFG030255	MymA operon	31.08	222	145	4	73	289	72	290	2e-23	97.4
HM-7_01263	VFG031744	RegX3	39.74	229	133	4	1	228	1	225	2e-43	145
HM-7_01272	VFG016003	Pyoverdine	23.04	395	263	11	21	397	52	423	2e-14	74.3
HM-7_01274	VFG022788	ABC transporter	28.77	219	137	9	17	230	346	550	5e-15	74.3
HM-7_01277	VFG045346	IlpA	32.02	253	162	6	20	269	21	266	6e-30	113
HM-7_01279	VFG030706	Trehalose-recycling ABC transporter	36.67	240	144	3	2	241	4	235	7e-40	144
HM-7_01286	VFG044398	Pyridine-2,6-dithiocarboxylic acid	31.07	412	244	12	25	423	126	510	7e-54	191
HM-7_01288	VFG017683	Isocitrate lyase	30.52	249	163	6	58	305	503	742	6e-22	101
HM-7_01293	VFG016166	achromobactin	63.71	259	94	0	1	259	1	259	1e-127	362
HM-7_01295	VFG005767	Beta-hemolysin/cytolysin	29.5	261	143	7	3	253	2	231	4e-25	100
HM-7_01296	VFG005533	Serine protease	45.48	343	164	8	129	453	59	396	1e-80	254
HM-7_01297	VFG022910	PhoP/R	33.69	187	123	1	5	190	15	201	3e-33	119
HM-7_01298	VFG004056	PhoPQ	21.65	291	211	11	149	431	188	469	1e-12	69.3
HM-7_01308	VFG027255	DevR/S	38.35	206	127	0	1	206	1	206	4e-45	149
HM-7_01309	VFG041502	T3SS	34.16	202	124	6	148	344	286	483	4e-18	85.1
HM-7_01315	VFG038840	Polar flagella	41.53	248	139	3	1	247	1	243	8e-61	191
HM-7_01316	VFG043391	Pse5Ac7Ac	35.45	330	179	10	1	322	1	304	3e-42	148
HM-7_01317	VFG015355	P. syringae TTSS effectors	25.81	430	291	12	19	435	13	427	2e-28	115
HM-7_01318	VFG019760	Type IV pili biosynthesis	25.54	325	186	5	317	594	140	455	2e-26	112
HM-7_01321	VFG006719	Listeria adhesion protein	30.93	388	222	12	36	386	483	861	1e-40	153
HM-7_01323	VFG044135	direct heme uptake system	40.8	250	135	2	13	256	23	265	4e-58	191
HM-7_01324	VFG013710	ABC-type heme transporter	40.77	287	166	3	66	351	65	348	3e-56	186
HM-7_01325	VFG044112	direct heme uptake system	28.06	253	166	7	62	306	30	274	1e-21	92.8
HM-7_01329	VFG045670	BopD	26.23	324	214	8	1	310	1	313	3e-20	89.7
HM-7_01331	VFG031685	SenX3	25.97	231	159	6	352	577	152	375	2e-13	72.8
HM-7_01332	VFG031738	RegX3	35.68	227	143	2	5	231	3	226	9e-48	157
HM-7_01333	VFG044358	achromobactin	49.03	257	131	0	1	257	1	257	1e-85	256
HM-7_01334	VFG044271	staphyloferrin A	37.69	329	192	4	10	338	5	320	4e-51	172
HM-7_01335	VFG044190	direct heme uptake system	36.62	314	186	3	47	347	47	360	8e-45	157
HM-7_01336	VFG044253	staphyloferrin B	30.9	301	181	14	1	281	1	294	6e-23	96.7
HM-7_01350	VFG031402	Copper exporter	33.5	588	350	8	120	673	149	729	2e-88	293
HM-7_01351	VFG012578	Iron/managanease transport	38.98	236	141	2	2	234	4	239	4e-61	193
HM-7_01352	VFG012582	Iron/managanease transport	35.19	287	181	1	1	287	1	282	3e-52	172
HM-7_01353	VFG002157	LpeA	59.29	312	123	2	1	311	1	309	2e-136	389
HM-7_01361	VFG031421	Copper exporter	50.23	641	295	5	171	802	138	763	0	625
HM-7_01365	VFG043139	lateral flagella	32.91	158	101	3	356	509	347	503	4e-14	75.1
HM-7_01383	VFG030706	Trehalose-recycling ABC transporter	42.69	260	132	4	4	263	6	248	1e-60	200
HM-7_01391	VFG007915	PDIM	25.61	246	162	4	9	249	20	249	3e-19	85.5
HM-7_01393	VFG018662	Streptococcal enolase	71.66	434	119	2	1	430	1	434	0	637
HM-7_01397	VFG005359	Streptococcal plasmin receptor/GAPDH	54.9	337	142	4	1	332	1	332	7e-119	346
HM-7_01400	VFG044396	Pyridine-2,6-dithiocarboxylic acid	35.33	334	194	6	25	345	329	653	1e-59	206
HM-7_01401	VFG043148	lateral flagella	40.91	330	169	5	147	475	125	429	5e-77	248
HM-7_01403	VFG042736	type IV pili	34.15	366	232	5	72	430	132	495	7e-65	216
HM-7_01406	VFG006259	ABC transporter	32.52	206	134	4	27	232	18	218	2e-26	105
HM-7_01407	VFG036559	ABC transporter	29.31	232	140	6	24	249	19	232	1e-24	100
HM-7_01411	VFG005097	Capsule	57.14	371	157	2	6	375	5	374	2e-159	452
HM-7_01412	VFG012064	N-linked protein glycosylation	36.14	202	112	2	15	216	2	186	2e-33	119
HM-7_01413	VFG007642	Capsular polysaccharide	57.73	194	82	0	1	194	2	195	2e-78	233
HM-7_01415	VFG005890	Capsule	28.27	283	165	4	48	328	36	282	1e-30	117
HM-7_01416	VFG005868	Capsule	34.98	223	131	4	4	217	7	224	4e-38	138
HM-7_01418	VFG016396	Polysaccharide capsule	34.22	339	214	6	2	339	5	335	1e-65	213
HM-7_01419	VFG037945	Capsule	33.97	209	130	5	6	211	3	206	9e-29	112
HM-7_01420	VFG005974	Capsule	25	316	209	7	62	368	27	323	5e-20	89.7
HM-7_01421	VFG016401	Polysaccharide capsule	54.64	593	267	2	1	592	1	592	0	656
HM-7_01422	VFG016435	Polysaccharide capsule	47.79	226	118	0	2	227	5	230	2e-71	217
HM-7_01423	VFG016385	Polysaccharide capsule	35.87	223	141	2	1	221	1	223	6e-47	155
HM-7_01426	VFG044273	staphyloferrin A	27.91	301	191	8	1	277	4	302	2e-19	86.7
HM-7_01427	VFG044214	NEAT-type hemophore-mediated heme uptake system	34.39	314	180	6	29	333	26	322	1e-44	155
HM-7_01428	VFG013743	ABC transporter	38.93	298	180	2	36	331	64	361	2e-35	132
HM-7_01429	VFG033055	PdgA	48.74	199	99	2	263	459	251	448	9e-58	197
HM-7_01431	VFG016532	Capsule	38.64	132	80	1	125	255	136	267	4e-15	73.6
HM-7_01432	VFG000344	HitABC	27.48	262	170	8	2	258	5	251	2e-25	103
HM-7_01440	VFG000077	ClpP	78.42	190	41	0	1	190	1	190	5e-112	317
HM-7_01454	VFG043443	Fibronectin-binding protein	41.24	97	53	2	110	204	95	189	3e-13	71.2
HM-7_01457	VFG045297	LPS	44.05	252	140	1	1	252	2	252	2e-71	219
HM-7_01458	VFG014107	LPS O-antigen	24.11	224	159	4	8	225	8	226	2e-12	64.7
HM-7_01459	VFG014106	LPS O-antigen	42.03	207	113	3	1	205	1	202	1e-46	152
HM-7_01471	VFG032467	Lipoprotein diacylglyceryl transferase	62.31	260	97	1	1	260	1	259	5e-100	293
HM-7_01487	VFG036963	FarAB	27.21	305	208	6	3	296	6	307	4e-19	89.4
HM-7_01489	VFG024164	PhoP/R	38.53	231	137	4	2	228	10	239	5e-53	170
HM-7_01490	VFG022911	PhoP/R	30.85	295	187	5	182	460	174	467	5e-39	147
HM-7_01492	VFG000670	LPS	40.98	305	180	0	5	309	1	305	1e-79	244
HM-7_01502	VFG030691	Trehalose-recycling ABC transporter	34.27	213	134	2	2	213	4	211	2e-37	134
HM-7_01508	VFG023546	Accessory secretion factor	35.96	748	382	14	36	765	46	714	2e-136	424
HM-7_01510	VFG015639	Type IV pili twitching motility related proteins	30.52	344	210	8	180	512	319	644	6e-16	80.9
HM-7_01513	VFG043282	HexNAc	32.26	124	80	2	4	126	4	124	4e-17	72
HM-7_01514	VFG043284	HexNAc	31.75	274	160	9	239	507	255	506	5e-22	99
HM-7_01516	VFG045727	Carbon storage regulator A	44.44	54	30	0	1	54	1	54	1e-16	66.6
HM-7_01517	VFG043281	HexNAc	34.65	127	82	1	19	144	4	130	4e-21	82.8
HM-7_01519	VFG043280	HexNAc	25.32	312	221	5	1	302	1	310	2e-29	114
HM-7_01520	VFG043279	HexNAc	27.08	506	293	11	1	501	1	435	3e-41	153
HM-7_01528	VFG024200	DevR/S	37.89	227	126	3	3	229	7	218	4e-46	152
HM-7_01529	VFG041502	T3SS	32.03	231	137	9	160	383	266	483	1e-22	99
HM-7_01531	VFG016408	Polysaccharide capsule	36.18	293	171	8	39	329	24	302	5e-50	169
HM-7_01532	VFG005841	Capsule	43.96	323	165	5	5	312	7	328	4e-67	216
HM-7_01534	VFG016398	Polysaccharide capsule	49.8	245	118	2	6	250	10	249	3e-83	249
HM-7_01537	VFG038016	Capsule	32.61	322	197	6	2	304	16	336	2e-34	127
HM-7_01538	VFG016428	Polysaccharide capsule	49.88	429	215	0	5	433	3	431	1e-153	442
HM-7_01539	VFG011150	LPS	21.79	390	250	11	19	390	33	385	1e-12	68.6
HM-7_01540	VFG016431	Polysaccharide capsule	31.14	289	189	3	70	353	65	348	4e-33	131
HM-7_01541	VFG016416	Polysaccharide capsule	45.27	201	95	3	30	218	30	227	3e-52	168
HM-7_01544	VFG012089	Cwp66	32.51	243	159	3	2	240	5	246	2e-33	133
HM-7_01545	VFG012090	Cwp66	33	297	188	5	28	314	36	331	1e-33	134
HM-7_01546	VFG012092	Cwp66	29.37	378	231	15	46	395	18	387	2e-30	126
HM-7_01548	VFG016389	Polysaccharide capsule	46.64	298	158	1	9	305	2	299	2e-104	307
HM-7_01549	VFG001373	Capsule	62.85	358	133	0	6	363	4	361	2e-169	477
HM-7_01550	VFG016382	Polysaccharide capsule	78.84	293	61	1	1	293	1	292	3e-164	457
HM-7_01551	VFG002181	Capsule	57.85	242	101	1	2	242	4	245	3e-101	312
HM-7_01552	VFG002180	Capsule	43.64	275	150	2	1	275	1	270	5e-65	204
HM-7_01553	VFG002188	Capsule	33.59	387	224	15	39	409	19	388	2e-47	174
HM-7_01554	VFG002188	Capsule	45.29	382	197	5	373	749	9	383	4e-113	348
HM-7_01556	VFG000331	LOS	33.33	132	80	3	2	126	341	471	2e-12	62.8
HM-7_01557	VFG007686	Capsular polysaccharide	36.46	192	119	3	49	237	53	244	9e-38	132
HM-7_01558	VFG002188	Capsule	28.03	289	186	12	112	382	102	386	1e-20	92.4
HM-7_01559	VFG004478	Fibronectin-binding protein	46.88	192	88	5	674	855	1256	1443	2e-43	171
HM-7_01560	VFG016424	Polysaccharide capsule	56.83	315	135	1	1	315	1	314	1e-134	384
HM-7_01561	VFG030646	Trehalose-recycling ABC transporter	30.57	265	175	5	14	273	17	277	3e-33	122
HM-7_01562	VFG030565	Trehalose-recycling ABC transporter	29.68	283	175	4	29	311	11	269	1e-26	106
HM-7_01564	VFG045728	LetA/LetS two component	34.04	141	85	2	1	134	1	140	2e-18	83.6
HM-7_01565	VFG014982	Alginate regulation	31.44	194	115	5	268	461	163	338	9e-24	102
HM-7_01570	VFG045670	BopD	24.26	338	238	9	9	336	3	332	2e-14	72.8
HM-7_01572	VFG038839	Polar flagella	35.51	245	153	4	13	254	5	247	5e-42	144
HM-7_01577	VFG044370	thioquinolobactin	26.2	374	260	6	21	388	39	402	2e-20	92.8
HM-7_01578	VFG016389	Polysaccharide capsule	35.29	289	165	10	40	321	28	301	3e-47	160
HM-7_01580	VFG006734	Cell wall hydrolase	43.75	96	50	3	158	253	349	440	1e-18	87.8
HM-7_01582	VFG016292	Polyglutamic acid capsule	62.4	383	141	3	2	381	1	383	6e-174	490
HM-7_01583	VFG016295	Polyglutamic acid capsule	91.22	148	13	0	1	148	1	148	5e-57	174
HM-7_01584	VFG016300	Polyglutamic acid capsule	89.57	393	41	0	1	393	1	393	0	739
HM-7_01588	VFG045671	BopD	27.24	323	200	7	3	303	4	313	2e-22	95.9
HM-7_01589	VFG017773	LOS	29.01	262	148	11	39	278	50	295	3e-13	69.3
HM-7_01591	VFG013192	Haemophilus iron transport locus	28.46	246	153	7	2	240	3	232	4e-26	108
HM-7_01595	VFG037470	Heme utilization	22.47	227	172	2	9	234	9	232	3e-14	71.6
HM-7_01601	VFG016428	Polysaccharide capsule	51.74	431	207	1	1	431	1	430	2e-166	475
HM-7_01610	VFG019292	LPS	48.92	139	70	1	3	140	13	151	6e-42	136
HM-7_01612	VFG025670	Flagella	33.57	277	163	8	1	272	1	261	3e-31	116
HM-7_01613	VFG043314	HexNAc	30.63	284	163	7	1	278	1	256	2e-22	93.2
HM-7_01620	VFG036972	FarAB	23.82	340	226	8	24	351	35	353	2e-13	72.4
HM-7_01621	VFG041139	T6SS	36.7	218	132	4	12	223	45	262	9e-38	132
HM-7_01622	VFG002901	O-antigen	30.73	179	111	1	20	185	11	189	2e-22	90.9
HM-7_01623	VFG006259	ABC transporter	37.71	236	145	2	8	242	5	239	2e-47	160
HM-7_01630	VFG013252	LOS	25.38	520	324	16	97	589	97	579	2e-37	146
HM-7_01650	VFG043297	HexNAc	30.49	387	244	9	4	386	27	392	6e-35	135
HM-7_01652	VFG041785	T3SS	31.92	448	279	14	6	441	4	437	2e-43	159
HM-7_01675	VFG014451	Flagella	28.88	322	193	11	121	420	121	428	5e-19	88.6
HM-7_01680	VFG019760	Type IV pili biosynthesis	38.14	118	73	0	1	118	1	118	2e-18	79.3
HM-7_01686	VFG044398	Pyridine-2,6-dithiocarboxylic acid	35.06	385	234	6	1	379	133	507	2e-67	221
HM-7_01687	VFG043689	colibactin	33.16	374	230	9	4	365	1	366	5e-57	190
HM-7_01688	VFG043691	colibactin	39.5	281	166	2	6	283	3	282	5e-67	210
HM-7_01696	VFG013248	LOS	34.39	570	369	4	3	569	18	585	2e-108	336
HM-7_01738	VFG038840	Polar flagella	36.14	249	150	3	1	249	1	240	3e-45	152
HM-7_01741	VFG038841	Polar flagella	29.52	227	145	4	35	260	36	248	3e-17	78.6
HM-7_01742	VFG007663	Capsular polysaccharide	35.71	140	79	5	15	146	21	157	7e-17	73.2
HM-7_01743	VFG005838	Capsule	39.08	284	164	5	3	279	2	283	6e-64	202
HM-7_01744	VFG007659	Capsular polysaccharide	50.76	327	140	4	6	311	4	330	4e-108	319
HM-7_01745	VFG006041	Capsule	45.11	235	125	4	1	232	1	234	3e-66	206
HM-7_01746	VFG038847	Polar flagella	28.14	199	120	7	145	329	140	329	1e-13	70.9
HM-7_01748	VFG006028	Capsule	36.76	340	193	5	17	353	2	322	3e-63	205
HM-7_01750	VFG011157	LPS	48.48	396	186	7	6	386	17	409	2e-122	360
HM-7_01752	VFG016398	Polysaccharide capsule	35.14	111	63	3	4	114	11	112	2e-14	70.5
HM-7_01771	VFG005480	C5a peptidase	30.57	494	247	23	179	601	121	589	6e-35	143
HM-7_01783	VFG016309	Polysaccharide capsule	64.53	327	116	0	2	328	3	329	4e-159	447
HM-7_01787	VFG032844	Cell wall teichoic acid glycosylation protein	45.67	127	69	0	9	135	19	145	1e-27	99.8
HM-7_01798	VFG037478	Heme utilization	22.34	291	208	6	9	289	24	306	4e-18	82.8
HM-7_01803	VFG013192	Haemophilus iron transport locus	35.68	241	147	3	1	240	1	234	2e-44	152
HM-7_01804	VFG002901	O-antigen	32.86	210	131	2	13	212	11	220	6e-31	113
HM-7_01805	VFG043099	peritrichous flagella	31.98	222	145	4	34	252	42	260	4e-34	123
HM-7_01810	VFG013573	Haemophilus iron transport locus	29.25	212	140	5	8	218	6	208	7e-21	93.6
HM-7_01827	VFG031595	Sigma L	31.93	166	109	3	10	172	4	168	2e-19	80.5
HM-7_01829	VFG012538	Yersiniabactin siderophore	40.43	235	138	2	338	570	353	587	3e-51	185
HM-7_01830	VFG034041	Yersiniabactin siderophore	35.48	248	160	0	326	573	336	583	6e-35	139
HM-7_01833	VFG013730	ABC transporter	42.86	252	143	1	3	253	7	258	5e-61	197
HM-7_01834	VFG044214	NEAT-type hemophore-mediated heme uptake system	35.19	324	207	2	14	336	2	323	6e-44	153
HM-7_01835	VFG044215	NEAT-type hemophore-mediated heme uptake system	31.44	264	168	4	49	307	34	289	1e-36	132
HM-7_01836	VFG044212	NEAT-type hemophore-mediated heme uptake system	51.82	247	118	1	2	247	6	252	4e-89	264
HM-7_01837	VFG044213	NEAT-type hemophore-mediated heme uptake system	62.11	256	97	0	1	256	1	256	6e-114	327
HM-7_01838	VFG044214	NEAT-type hemophore-mediated heme uptake system	68.81	327	102	0	1	327	1	327	4e-141	402
HM-7_01839	VFG044215	NEAT-type hemophore-mediated heme uptake system	64.26	291	103	1	4	294	2	291	3e-135	384
HM-7_01840	VFG044216	NEAT-type hemophore-mediated heme uptake system	36.27	510	284	8	1	506	1	473	1e-87	291
HM-7_01841	VFG044218	NEAT-type hemophore-mediated heme uptake system	38.63	233	122	3	1	213	1	232	6e-49	159
HM-7_01842	VFG044218	NEAT-type hemophore-mediated heme uptake system	49.17	120	61	0	29	148	28	147	2e-32	114
HM-7_01848	VFG011777	LOS	27.12	236	128	5	69	268	1	228	2e-20	88.2
HM-7_01883	VFG044173	vibrioferrin	29.71	239	161	3	280	513	1	237	2e-28	113
HM-7_01891	VFG016348	Immune inhibitor A metalloprotease	44.64	811	399	18	7	791	10	796	0	538
HM-7_01901	VFG032994	OatA	51.24	603	273	9	9	599	10	603	0	565
HM-7_01909	VFG043366	Pse5Ac7Ac	44.76	105	51	1	391	495	546	643	2e-18	88.6
HM-7_01925	VFG030565	Trehalose-recycling ABC transporter	27.18	298	187	7	136	430	18	288	1e-16	79.7
HM-7_01926	VFG030670	Trehalose-recycling ABC transporter	29.73	259	179	2	23	280	24	280	1e-35	129
HM-7_01932	VFG007915	PDIM	30.99	313	198	7	7	306	15	322	4e-44	154
HM-7_01940	VFG035924	ABC transporter for dispersin	30.77	208	140	2	10	216	2	206	1e-30	112
HM-7_01954	VFG002197	BopD	26.71	337	230	6	9	336	3	331	6e-25	102
HM-7_01968	VFG015519	Phenazines biosynthesis	32.17	258	156	7	9	266	7	245	8e-25	100
HM-7_01969	VFG037470	Heme utilization	23.34	287	211	4	5	283	6	291	1e-13	69.3
HM-7_01984	VFG044358	achromobactin	31.76	233	144	6	306	529	7	233	6e-29	115
HM-7_01988	VFG023849	PDIM	27.03	222	157	2	5	221	11	232	6e-23	96.3
HM-7_01990	VFG005533	Serine protease	43.22	398	191	10	18	390	9	396	4e-90	277
HM-7_01994	VFG027137	PhoP/R	34.77	256	137	8	362	604	233	471	3e-32	130
HM-7_01995	VFG031738	RegX3	49.56	226	112	1	4	229	3	226	3e-65	201
HM-7_02005	VFG030907	Cyp125	32.34	368	227	7	47	401	54	412	3e-59	198
HM-7_02012	VFG012502	Salmochelin siderophore	29.26	270	149	9	27	283	59	299	2e-21	92.4
HM-7_02014	VFG044273	staphyloferrin A	25.57	309	199	13	3	295	5	298	3e-17	80.9
HM-7_02017	VFG044371	thioquinolobactin	30.96	407	268	8	3	402	15	415	7e-40	146
HM-7_02023	VFG009772	Sigma M	28.87	142	101	0	10	151	28	169	5e-16	71.6
HM-7_02025	VFG037032	Catalase	43.45	481	260	5	17	495	11	481	1e-125	377
HM-7_02030	VFG030700	Trehalose-recycling ABC transporter	44.49	236	127	2	2	237	4	235	1e-60	198
HM-7_02041	VFG038725	Polar flagella	34.92	252	159	2	17	264	3	253	2e-46	155
HM-7_02070	VFG043366	Pse5Ac7Ac	45.53	123	59	2	141	262	528	643	3e-20	90.1
HM-7_02134	VFG031170	Proteasome-associated proteins	36.28	226	112	6	150	346	241	463	4e-28	119
HM-7_02135	VFG008123	Pantothenate synthesis	36.98	265	154	4	3	257	140	401	4e-50	169
HM-7_02137	VFG043537	Peb4/CBF2	26.53	294	175	10	16	295	6	272	9e-15	72.8
HM-7_02138	VFG044254	staphyloferrin B	37.12	299	180	4	6	299	10	305	2e-35	130
HM-7_02139	VFG026700	Mycobactin	38.27	486	253	7	6	458	25	496	6e-80	257
HM-7_02166	VFG000079	ClpC	78.39	805	172	2	1	805	1	803	0	1228
HM-7_02170	VFG000700	Capsule	33.04	227	144	5	6	225	9	234	2e-25	102
HM-7_02173	VFG016409	Polysaccharide capsule	40.15	132	76	2	102	232	7	136	4e-25	97.4
HM-7_02191	VFG016483	Fibronectin-binding protein	36.62	142	83	4	1	138	1	139	5e-14	74.3
HM-7_02192	VFG016490	EF-Tu	75.33	381	93	1	1	381	1	380	0	556
HM-7_02224	VFG007024	RTX toxin	32.57	261	147	7	6	255	122	364	6e-31	118
HM-7_02225	VFG006259	ABC transporter	33.06	248	151	8	23	262	20	260	3e-30	116
HM-7_02240	VFG033024	PdgA	31.22	189	122	5	55	242	264	445	3e-22	94.7
HM-7_02260	VFG000121	Alginate	37.16	183	107	3	9	187	11	189	3e-33	117
HM-7_02264	VFG013515	Exopolysaccharide	45.72	444	233	5	3	443	5	443	1e-121	361
HM-7_02268	VFG007913	PDIM	32.78	302	195	4	8	302	12	312	2e-46	159
HM-7_02270	VFG030673	Trehalose-recycling ABC transporter	36.48	244	134	6	2	239	4	232	5e-30	115
HM-7_02277	VFG023851	PDIM	27.3	315	202	5	3	302	2	304	1e-39	141
HM-7_02290	VFG007910	PDIM	28.89	225	142	5	5	217	6	224	4e-26	104
HM-7_02301	VFG032174	Sugar-uptake system	29.82	389	253	8	31	409	30	408	3e-39	147
HM-7_02304	VFG009135	FAS-II	39.4	401	231	7	12	409	25	416	2e-86	269
HM-7_02314	VFG044378	thioquinolobactin	36	100	61	2	20	116	277	376	3e-12	61.6
HM-7_02343	VFG022260	ESX-4	29.72	323	148	12	452	725	89	381	8e-16	80.9
HM-7_02353	VFG044123	alcaligin	29.18	257	182	0	32	288	28	284	1e-21	95.9
HM-7_02357	VFG002177	Cytolysin	28.41	271	138	9	138	362	133	393	3e-13	71.6
HM-7_02358	VFG043683	colibactin	34.63	205	119	4	8	198	5	208	8e-13	70.1
HM-7_02362	VFG030399	MymA operon	32.81	509	322	12	1	498	1	500	1e-81	261
HM-7_02374	VFG012195	VirR/VirS two component system	24	200	140	5	1	193	1	195	6e-13	65.9
HM-7_02375	VFG023850	PDIM	39.8	201	120	1	24	224	1	200	8e-48	159
HM-7_02382	VFG038840	Polar flagella	35.8	243	149	5	8	250	6	241	1e-36	129
HM-7_02395	VFG013573	Haemophilus iron transport locus	37.84	222	130	2	49	270	19	232	1e-49	171
HM-7_02399	VFG038840	Polar flagella	27.52	218	139	5	3	216	6	208	3e-13	67
HM-7_02404	VFG045668	BopD	27.51	338	225	9	2	328	3	331	8e-31	118
HM-7_02405	VFG018009	LOS	37.03	343	200	6	90	428	21	351	3e-60	200
HM-7_02407	VFG000038	LPS	26.77	198	127	6	3	190	12	201	7e-13	68.6
HM-7_02409	VFG001235	Type IV pili	29.14	175	121	3	1	174	2	174	4e-11	59.7
HM-7_02425	VFG044392	Pyridine-2,6-dithiocarboxylic acid	27.09	203	133	4	6	203	318	510	1e-15	78.6
HM-7_02429	VFG042099	T3SS	32	150	95	4	11	157	2865	3010	4e-18	81.3
HM-7_02440	VFG002901	O-antigen	22.54	213	154	1	22	223	9	221	1e-16	75.5
HM-7_02441	VFG043047	peritrichous flagella	33.73	249	154	6	26	271	21	261	3e-22	92.8
HM-7_02447	VFG042927	type IV pili	33.16	196	127	1	342	533	223	418	1e-13	72.8
HM-7_02452	VFG013192	Haemophilus iron transport locus	36.41	357	213	6	1	356	1	344	4e-73	231
HM-7_02454	VFG030646	Trehalose-recycling ABC transporter	27.27	143	103	1	89	230	89	231	9e-11	60.8
HM-7_02455	VFG015906	Phytotoxin syringopeptin	33.28	3212	1969	54	6	3089	9792	12957	0	1582
HM-7_02456	VFG020073	Pyoverdine	33.83	3192	1949	64	1	3096	1550	4674	0	1664
HM-7_02457	VFG020071	Pyoverdine	33.7	1175	714	21	9	1148	2633	3777	0	636
HM-7_02458	VFG020071	Pyoverdine	36.33	2191	1275	45	1224	3339	1009	3154	0	1274
HM-7_02459	VFG016032	Pyoverdine	33.75	1363	829	22	1292	2628	989	2303	0	726
HM-7_02460	VFG016177	Yersiniabactin	33.9	236	139	9	17	239	18	249	2e-31	116
HM-7_02463	VFG007910	PDIM	28.33	233	146	5	2	217	6	234	9e-25	99.4
HM-7_02468	VFG043695	colibactin	28.75	160	106	4	26	177	24	183	9e-16	73.9
HM-7_02471	VFG043005	Type 2 pili	30.23	129	81	3	64	186	138	263	6e-13	65.9
HM-7_02473	VFG036559	ABC transporter	36.14	249	150	5	2	247	5	247	3e-41	144
HM-7_02474	VFG002901	O-antigen	27.08	192	128	3	50	230	35	225	4e-18	79.7
HM-7_02475	VFG041139	T6SS	39.41	236	137	6	39	270	28	261	3e-47	158
HM-7_02477	VFG001857	IraAB	23.31	502	333	12	21	494	18	495	8e-24	104
HM-7_02481	VFG041139	T6SS	34.75	236	142	6	34	264	38	266	2e-33	122
HM-7_02482	VFG002901	O-antigen	28.64	213	140	3	22	224	15	225	5e-22	90.1
HM-7_02483	VFG006259	ABC transporter	36.82	239	146	4	2	239	5	239	7e-38	135
HM-7_02487	VFG031738	RegX3	41.3	230	128	5	2	229	3	227	9e-58	182
HM-7_02488	VFG015070	GacS/GacA two-component system	27.7	343	207	6	171	474	174	514	3e-32	130
HM-7_02491	VFG044351	achromobactin	26.79	418	300	3	57	469	1	417	4e-41	152
HM-7_02498	VFG044201	achromobactin	34.38	416	254	9	37	439	42	451	5e-59	199
HM-7_02507	VFG043367	Pse5Ac7Ac	27.48	433	255	13	89	508	119	505	4e-25	109
HM-7_02528	VFG038841	Polar flagella	34.52	252	155	5	41	287	3	249	3e-34	124
HM-7_02534	VFG014092	Type IV pili twitching motility related proteins	29.05	241	163	4	28	264	24	260	8e-28	107
HM-7_02541	VFG001285	Intercellular adhesion proteins	27.2	375	263	5	47	418	45	412	3e-36	137
HM-7_02555	VFG043408	peritrichous flagella	34.51	113	74	0	5	117	4	116	1e-18	78.2
HM-7_02559	VFG007914	PDIM	33.33	210	136	2	8	214	10	218	2e-34	127
HM-7_02580	VFG042072	T3SS	26.83	246	172	5	94	333	429	672	2e-24	104
HM-7_02583	VFG022873	Sigma F	38.18	220	135	1	34	253	43	261	5e-46	154
HM-7_02588	VFG016502	PDH-B	37.61	327	189	4	10	335	11	323	4e-66	211
HM-7_02591	VFG007501	Flagella	39.94	353	165	8	307	615	139	488	3e-72	240
HM-7_02604	VFG030301	MymA operon	29.94	314	181	11	14	297	10	314	1e-24	102
HM-7_02608	VFG044351	achromobactin	26.1	341	252	0	67	407	8	348	1e-32	128
HM-7_02609	VFG016039	Pyoverdine	32.35	238	155	4	63	296	84	319	1e-31	120
HM-7_02654	VFG039383	T4SS effectors	34.81	135	84	4	4	136	9	141	1e-18	76.6
HM-7_02665	VFG012103	GroEL	74.71	526	131	1	1	524	1	526	0	750
HM-7_02838	VFG009772	Sigma M	30.32	155	106	1	13	165	23	177	6e-18	77.4
HM-7_02841	VFG037473	Heme utilization	26.55	290	202	7	1	282	1	287	1e-24	100
HM-7_02851	VFG007789	Purine synthesis	27.84	255	136	12	10	228	13	255	5e-18	80.9
HM-7_02863	VFG020075	Pyoverdine	29.29	437	278	11	14	438	41	458	6e-48	171
HM-7_02876	VFG043491	Fibronectin-binding protein	36.48	677	403	11	1	667	12	671	6e-138	419
HM-7_02879	VFG009424	Magnesium transport	36.8	125	70	3	8	132	5	120	1e-14	70.1
HM-7_02882	VFG043683	colibactin	29.91	214	143	1	25	231	26	239	8e-13	70.1
HM-7_02885	VFG037008	MtrCDE	25	804	553	16	303	1069	258	1048	4e-32	135
HM-7_02903	VFG006042	Capsule	26.29	213	133	6	1	197	1	205	1e-13	70.1
HM-7_02906	VFG002377	O-antigen	49.03	257	127	4	1	254	5	260	2e-82	247
HM-7_02907	VFG002376	O-antigen	30.72	345	201	10	4	322	6	338	3e-48	165
HM-7_02908	VFG026308	Capsule I	27.63	257	168	9	2	248	3	251	1e-22	95.5
HM-7_02909	VFG006083	Capsule	30.54	167	103	4	5	170	4	158	7e-15	74.7
HM-7_02910	VFG026308	Capsule I	21.86	279	199	6	1	266	1	273	3e-15	75.1
HM-7_02920	VFG013317	LOS	50	96	48	0	1	96	1	96	1e-22	95.5
HM-7_02921	VFG021788	ABC-type heme transporter	31.4	242	136	8	6	241	9	226	4e-16	79
HM-7_02925	VFG044405	HasA-type hemophore-mediated heme uptake system	26.11	226	144	6	290	498	291	510	1e-11	66.6
HM-7_02933	VFG016008	Pyoverdine	27.78	270	145	14	8	256	39	279	6e-12	64.3
HM-7_02957	VFG043209	peritrichous flagella	29.71	276	157	6	178	447	177	421	2e-20	94.7
HM-7_02963	VFG002420	AdsA	28.83	503	279	18	670	1137	151	609	1e-43	171
HM-7_02967	VFG031563	Tyrosine phosphatase	38.78	98	58	1	2	99	5	100	7e-18	75.5
HM-7_02975	VFG039532	T4SS effectors	42.68	239	131	5	4	239	6	241	3e-56	179
HM-7_02980	VFG033046	PdgA	40.1	192	108	3	66	257	210	394	6e-38	137
HM-7_02998	VFG016311	AtxA	20.31	512	343	13	4	495	7	473	5e-15	77.4
HM-7_02999	VFG043508	Fibrinogen binding protein	30.99	1746	1062	57	228	1868	202	1909	0	628
HM-7_03000	VFG019378	Sortase A	36.13	119	74	1	70	186	84	202	1e-15	72.4
HM-7_03012	VFG044253	staphyloferrin B	27.57	301	189	11	7	284	9	303	6e-21	91.3
HM-7_03013	VFG013149	LOS	32.41	577	371	8	3	569	27	594	5e-97	307
HM-7_03015	VFG031598	Sigma L	31.21	173	104	4	22	183	9	177	2e-22	88.6
HM-7_03018	VFG026089	Capsule I	37.38	214	106	8	15	219	1810	2004	5e-15	76.3
HM-7_03035	VFG000670	LPS	40.46	304	178	3	6	307	3	305	1e-77	239
HM-7_03047	VFG038841	Polar flagella	30.54	239	162	3	8	245	11	246	3e-28	107
HM-7_03051	VFG013250	LOS	34.84	577	362	7	5	577	18	584	4e-108	336
HM-7_03052	VFG016532	Capsule	35.86	198	112	4	91	275	82	277	6e-35	129
HM-7_03053	VFG016532	Capsule	50	134	67	0	125	258	132	265	2e-42	149
HM-7_03054	VFG032254	Oligopeptide-binding protein	24.84	467	308	16	83	518	93	547	5e-19	90.1
HM-7_03058	VFG013203	Heme biosynthesis	49.88	429	213	2	4	431	2	429	3e-140	407
HM-7_03060	VFG000478	Fur	31.11	135	91	2	40	172	7	141	9e-16	70.1
HM-7_03093	VFG013573	Haemophilus iron transport locus	40	200	113	4	16	211	14	210	2e-41	144
HM-7_03099	VFG007914	PDIM	30.13	229	154	3	4	227	10	237	4e-28	109
HM-7_03112	VFG044351	achromobactin	29.83	352	246	1	61	411	1	352	4e-42	156
HM-7_03116	VFG043139	lateral flagella	31.74	167	108	3	190	354	345	507	6e-17	82
HM-7_03122	VFG043017	Deoxyhexose linking sugar, 209 Da capping structure	36.17	188	110	6	269	450	74	257	1e-28	116
HM-7_03123	VFG002420	AdsA	26.67	510	288	23	458	920	140	610	2e-29	125
HM-7_03124	VFG043005	Type 2 pili	35.4	113	65	4	64	169	138	249	5e-14	68.9
HM-7_03133	VFG044201	achromobactin	32.57	436	255	11	31	445	39	456	2e-54	187
HM-7_03138	VFG013331	LOS	35.7	549	303	15	32	572	37	543	2e-93	297
HM-7_03139	VFG001825	DevRS	26.39	269	162	10	126	375	327	578	6e-16	79
HM-7_03140	VFG024201	DevR/S	39.62	212	127	1	1	212	2	212	3e-51	164
HM-7_03143	VFG037032	Catalase	48.64	477	242	3	8	482	10	485	4e-156	453
HM-7_03148	VFG006734	Cell wall hydrolase	37.5	112	67	2	161	270	351	461	3e-15	74.7
HM-7_03152	VFG009743	Sigma E	25.16	159	104	2	4	153	82	234	6e-16	72.4
HM-7_03154	VFG019156	Hemolysin	31.1	418	275	5	22	430	24	437	5e-55	188
HM-7_03156	VFG012165	Hemolysin	32.67	404	263	6	28	428	32	429	7e-57	194
HM-7_03164	VFG033030	PdgA	35.38	195	110	6	85	277	264	444	8e-27	108
HM-7_03168	VFG013250	LOS	31.18	574	375	14	10	573	21	584	8e-56	197
HM-7_03169	VFG013250	LOS	35.53	515	317	8	158	664	77	584	2e-93	300
HM-7_03173	VFG030724	Trehalose-recycling ABC transporter	50.52	386	158	4	1	360	1	379	5e-130	378
HM-7_03181	VFG013626	Heme biosynthesis	27.59	319	207	9	172	487	7	304	3e-29	118
HM-7_03182	VFG037341	Acinetobactin	36.13	429	267	3	1	422	4	432	2e-93	288
HM-7_03183	VFG030115	Potassium/proton antiporter	31.41	382	239	7	4	379	7	371	7e-28	113
HM-7_03192	VFG032878	PrsA2	47.57	206	103	4	20	223	21	223	1e-49	166
HM-7_03202	VFG007914	PDIM	33.01	206	138	0	19	224	23	228	2e-30	115
HM-7_03209	VFG013200	Heme biosynthesis	39.83	344	200	4	8	344	6	349	1e-79	247
HM-7_03218	VFG032188	Lipoate protein ligase A1	64.05	331	117	1	1	329	1	331	4e-151	427
HM-7_03219	VFG030400	MymA operon	34.38	480	275	12	42	506	1	455	2e-85	271
HM-7_03224	VFG043367	Pse5Ac7Ac	32.75	171	102	3	271	431	381	548	8e-19	88.6
HM-7_03226	VFG038840	Polar flagella	34.02	244	153	5	40	281	3	240	9e-36	128
HM-7_03235	VFG007245	Periplasmic binding protein-dependent ABC transport systems	44.23	312	171	1	5	316	3	311	8e-103	303
HM-7_03236	VFG007254	Periplasmic binding protein-dependent ABC transport systems	46.64	283	151	0	29	311	31	313	2e-78	241
HM-7_03237	VFG007255	Periplasmic binding protein-dependent ABC transport systems	53.6	250	116	0	1	250	1	250	1e-102	298
HM-7_03238	VFG037376	Acinetobactin	33.44	323	198	7	2	312	5	322	5e-58	189
HM-7_03239	VFG016389	Polysaccharide capsule	34.5	313	180	11	16	318	4	301	3e-53	176
HM-7_03266	VFG015551	Phenazines biosynthesis	38.72	563	332	7	2	553	1	561	2e-141	424
HM-7_03274	VFG016409	Polysaccharide capsule	39.29	84	50	1	90	173	56	138	8e-15	67.8
HM-7_03275	VFG016057	Pyoverdine	61.47	436	168	0	13	448	37	472	0	578
HM-7_03276	VFG044338	desferrioxamine	42.7	459	255	4	44	496	56	512	2e-128	383
HM-7_03277	VFG044203	petrobactin	47.83	598	294	7	1	584	1	594	0	535
HM-7_03278	VFG016090	Pyoverdine	32.92	161	108	0	11	171	38	198	9e-25	95.5
HM-7_03279	VFG044339	desferrioxamine	42.69	431	235	7	8	435	3	424	2e-107	324
HM-7_03280	VFG033972	Aerobactin siderophore	34.47	557	351	7	11	566	1	544	6e-107	333
HM-7_03288	VFG015639	Type IV pili twitching motility related proteins	31.41	312	184	10	204	508	365	653	9e-15	77
HM-7_03302	VFG044347	achromobactin	33.91	404	218	11	15	370	53	455	4e-65	214
HM-7_03305	VFG015903	Phytotoxin phaseolotoxin	37.3	319	182	4	9	309	5	323	4e-61	197
HM-7_03315	VFG009135	FAS-II	40	395	228	6	20	411	28	416	6e-96	293
HM-7_03317	VFG016532	Capsule	41.67	132	75	1	134	265	137	266	9e-29	112
HM-7_03318	VFG016532	Capsule	48.15	135	69	1	150	283	136	270	6e-41	145
HM-7_03319	VFG032255	Oligopeptide-binding protein	25	504	301	24	23	481	22	493	2e-15	79
HM-7_03324	VFG032255	Oligopeptide-binding protein	34.58	509	299	14	58	545	64	559	1e-72	241
HM-7_03327	VFG016532	Capsule	44.06	143	78	1	128	270	129	269	5e-36	133
HM-7_03328	VFG016532	Capsule	47.78	180	90	2	123	299	129	307	8e-50	167
HM-7_03334	VFG037212	Phospholipase D	22.73	396	223	9	143	457	79	472	4e-14	74.7
HM-7_03340	VFG041578	T3SS	45.19	135	68	2	119	252	39	168	1e-34	123
HM-7_03350	VFG015931	Hydrogen cyanide production	27.66	394	244	7	1	353	1	394	5e-36	135
HM-7_03353	VFG044378	thioquinolobactin	29.22	219	132	3	3	208	19	227	1e-20	91.3
HM-7_03355	VFG038841	Polar flagella	29.39	262	165	9	1	255	1	249	1e-15	73.9
HM-7_03396	VFG006042	Capsule	24.15	207	142	3	1	194	1	205	1e-14	72.4
HM-7_03397	VFG011805	LOS	28.66	164	106	4	64	220	64	223	4e-11	60.5
HM-7_03400	VFG037478	Heme utilization	27.21	272	192	5	18	285	33	302	6e-15	73.6
HM-7_03401	VFG044371	thioquinolobactin	29.02	348	218	9	50	379	73	409	4e-21	94.4
HM-7_03408	VFG030290	MymA operon	32.62	374	242	9	1	367	44	414	3e-43	155
HM-7_03411	VFG043285	HexNAc	47.91	311	131	5	1	302	1	289	2e-64	204
HM-7_03413	VFG043285	HexNAc	49.48	291	126	5	1	272	1	289	3e-66	207
HM-7_03415	VFG043366	Pse5Ac7Ac	28.34	247	142	7	42	261	404	642	5e-16	77.4
HM-7_03419	VFG012147	Enterotoxin	33.11	148	91	4	18	158	85	231	1e-20	92
HM-7_03426	VFG016305	Polyglutamic acid capsule	76.88	584	133	1	1	582	1	584	0	900
HM-7_03430	VFG013192	Haemophilus iron transport locus	46.12	232	119	1	6	237	7	232	1e-66	209
HM-7_03435	VFG030301	MymA operon	27.37	358	220	13	16	342	21	369	2e-17	82.4
HM-7_03437	VFG016502	PDH-B	49.16	299	149	3	8	305	5	301	8e-77	238
HM-7_03441	VFG005767	Beta-hemolysin/cytolysin	32.35	238	156	3	12	247	2	236	9e-30	111
HM-7_03446	VFG019090	Serine protease	45.92	331	160	8	106	432	76	391	9e-83	259
HM-7_03451	VFG016532	Capsule	43.66	142	77	2	123	263	125	264	5e-34	127
HM-7_03452	VFG032254	Oligopeptide-binding protein	35.14	518	322	9	23	527	31	547	5e-87	279
HM-7_03455	VFG032106	Cell wall hydrolase	34	100	63	1	183	282	415	511	2e-15	76.3
HM-7_03456	VFG016532	Capsule	44.09	186	91	2	83	256	77	261	2e-44	154
HM-7_03471	VFG043553	MG1142	34.65	127	69	5	7	127	8	126	6e-13	61.6
HM-7_03477	VFG002177	Cytolysin	28.4	257	129	6	41	259	133	372	3e-17	81.6
HM-7_03479	VFG006826	LisR/LisK	53.33	225	103	2	4	227	2	225	5e-64	198
HM-7_03480	VFG032638	LisR/LisK	36.12	299	184	5	151	445	178	473	1e-52	183
HM-7_03491	VFG043139	lateral flagella	35.59	444	283	3	360	802	331	772	2e-89	298
HM-7_03504	VFG014377	Flagella	25	340	221	8	400	730	90	404	2e-25	109
HM-7_03515	VFG014381	Flagella	28.7	230	156	4	268	496	164	386	1e-21	96.7
HM-7_03517	VFG043437	peritrichous flagella	49.8	245	120	2	10	251	14	258	3e-69	214
HM-7_03518	VFG043255	<beta>-GlcNAc	47.71	262	136	1	1	261	1	262	9e-66	206
HM-7_03520	VFG000080	ClpE	63.87	703	229	5	1	681	1	700	0	866
HM-7_03532	VFG031407	Copper exporter	34.51	536	347	3	104	637	229	762	4e-86	285
HM-7_03534	VFG045670	BopD	26.87	335	225	8	4	324	5	333	9e-26	105
HM-7_03541	VFG006892	Accessory colonization factor	28.08	438	280	10	120	543	114	530	6e-38	149
HM-7_03542	VFG005766	Beta-hemolysin/cytolysin	34.92	252	146	4	8	257	2	237	2e-40	139
HM-7_03546	VFG038761	Polar flagella	28.57	238	161	3	374	606	99	332	3e-23	100
HM-7_03552	VFG043425	peritrichous flagella	48.49	299	151	3	6	302	5	302	8e-88	264
HM-7_03561	VFG005766	Beta-hemolysin/cytolysin	30.77	247	155	6	4	246	2	236	6e-25	99
HM-7_03577	VFG001404	AhpC	41.08	185	94	5	6	180	6	185	2e-42	140
HM-7_03582	VFG044378	thioquinolobactin	29.12	261	168	5	4	250	20	277	1e-27	111
HM-7_03590	VFG030684	Trehalose-recycling ABC transporter	36.91	233	132	6	2	228	4	227	1e-39	140
HM-7_03597	VFG037384	Acinetobactin	26.53	245	136	5	1	231	1	215	3e-17	81.6
HM-7_03602	VFG007490	Flagella	26.91	223	158	4	210	428	121	342	8e-23	98.6
HM-7_03613	VFG016506	PDH-B	45.77	319	172	1	7	325	12	329	2e-96	288
HM-7_03624	VFG011072	T3SS	28.3	159	113	1	8	165	33	191	2e-19	81.3
HM-7_03628	VFG016490	EF-Tu	37.25	204	101	11	9	199	14	203	7e-17	82.8
HM-7_03655	VFG000320	LPS	44.67	150	83	0	1	150	1	150	3e-41	135
HM-7_03677	VFG002184	Capsule	35.46	282	171	4	22	300	533	806	4e-45	162
HM-7_03686	VFG000477	RpoS	28.52	256	127	6	31	233	63	315	1e-19	85.9
HM-7_03687	VFG009734	Sigma F	31.69	243	151	4	27	258	23	261	7e-31	115
HM-7_03694	VFG044077	direct heme uptake system	27.48	262	169	8	3	255	2	251	4e-20	86.3
HM-7_03703	VFG032493	Lipoprotein-specific signal peptidase II	55.63	151	67	0	1	151	1	151	1e-48	154
HM-7_03707	VFG015903	Phytotoxin phaseolotoxin	27.3	315	194	10	3	285	10	321	7e-17	79.7
HM-7_03719	VFG015885	Phytotoxin phaseolotoxin	48.69	191	98	0	3	193	4	194	2e-64	197
HM-7_03723	VFG031933	Fibronectin-binding protein	52.19	571	268	3	1	568	1	569	0	579
HM-7_03724	VFG021054	Mg2+ transport	29.39	837	509	20	22	824	49	837	6e-86	294
HM-7_03732	VFG011178	LPS	28.07	285	189	6	1	275	1	279	8e-32	120
HM-7_03735	VFG006797	Serine-threonine phosphatase	47.52	242	126	1	3	244	1	241	2e-76	232
HM-7_03736	VFG008410	Protein kinase G	36.69	308	193	1	7	312	15	322	2e-64	218
HM-7_03748	VFG024735	PDIM	35.15	293	174	6	1	287	568	850	1e-42	156
HM-7_03749	VFG038840	Polar flagella	52.02	248	109	2	2	246	3	243	7e-86	255
HM-7_03753	VFG043311	HexNAc	34.05	185	109	6	123	306	146	318	2e-16	79
HM-7_03765	VFG043362	polar flagella	42.86	91	48	2	1	91	25	111	2e-18	73.2
HM-7_03771	VFG033169	Type I fimbriae	31.49	181	115	4	105	283	4	177	2e-21	89.4
HM-7_03775	VFG043291	HexNAc	31.58	114	59	1	14	127	10	104	8e-13	60.1
HM-7_03776	VFG043292	HexNAc	49.01	151	59	3	1	150	1	134	1e-42	137
HM-7_03777	VFG014405	Flagella	45.65	92	49	1	13	103	16	107	1e-17	71.6
HM-7_03778	VFG043107	peritrichous flagella	30.1	289	192	8	1	287	1	281	6e-32	129
HM-7_03779	VFG043295	HexNAc	42.51	327	188	0	11	337	29	355	1e-87	267
HM-7_03781	VFG043297	HexNAc	54.65	430	192	2	1	430	8	434	4e-165	471
HM-7_03785	VFG043260	<beta>-GlcNAc	35.04	117	70	2	27	142	26	137	1e-17	73.9
HM-7_03786	VFG006700	Flagella	42.75	269	141	6	1	263	1	262	3e-53	173
HM-7_03789	VFG006595	Flagella	34.78	322	202	3	3	320	2	319	5e-68	216
HM-7_03790	VFG043264	<beta>-GlcNAc	48.96	192	89	5	31	219	9	194	2e-41	151
HM-7_03791	VFG043408	peritrichous flagella	69.49	118	35	1	1	117	1	118	2e-58	176
HM-7_03793	VFG014549	Flagella	58.22	213	89	0	9	221	46	258	4e-68	209
HM-7_03794	VFG043308	HexNAc	61.7	47	18	0	36	82	36	82	3e-16	67
HM-7_03795	VFG043309	HexNAc	32.63	236	153	3	11	244	2	233	1e-32	125
HM-7_03796	VFG018036	Flagella	43.35	346	195	1	15	360	7	351	4e-78	244
HM-7_03797	VFG043310	HexNAc	48.33	629	317	2	53	677	59	683	9e-166	491
HM-7_03798	VFG043311	HexNAc	37.25	153	96	0	219	371	181	333	1e-28	114
HM-7_03799	VFG043312	HexNAc	36.95	295	176	4	5	295	3	291	1e-49	166
HM-7_03800	VFG043015	Deoxyhexose linking sugar, 209 Da capping structure	37.84	370	211	3	2	356	3	368	1e-85	263
HM-7_03801	VFG043409	peritrichous flagella	49.74	386	184	3	296	673	287	670	1e-125	387
HM-7_03802	VFG043041	peritrichous flagella	30.22	139	97	0	7	145	15	153	3e-22	87
HM-7_03805	VFG043101	peritrichous flagella	40.44	225	132	1	27	251	16	238	2e-51	167
HM-7_03811	VFG045688	Capsule	60.76	237	89	1	28	260	23	259	6e-107	310
HM-7_03812	VFG045683	Capsule	42.52	254	137	5	1	247	1	252	2e-59	189
HM-7_03814	VFG015010	Alginate regulation	29.4	449	269	10	8	417	11	450	4e-46	164
HM-7_03821	VFG039488	T4SS effectors	35.14	148	93	2	9	156	7	151	7e-27	98.6
HM-7_03825	VFG016491	EF-Tu	32.22	239	118	9	215	418	18	247	1e-13	72.8
HM-7_03832	VFG033046	PdgA	36.69	169	103	2	147	314	228	393	3e-34	129
HM-7_03844	VFG040864	T7SS	31.38	290	169	12	443	713	421	699	4e-26	115
HM-7_03847	VFG029919	GPL locus	22.69	1049	719	17	4	1034	8	982	2e-79	280
HM-7_03851	VFG029912	GPL locus	22.82	1034	689	19	27	1034	31	981	4e-56	211
HM-7_03852	VFG038840	Polar flagella	36.44	236	148	2	6	241	9	242	5e-42	143
HM-7_03862	VFG036998	MtrCDE	21.72	1068	750	30	1	1012	1	1038	6e-39	157
HM-7_03863	VFG030290	MymA operon	25.56	360	226	12	19	345	60	410	1e-18	86.7
HM-7_03864	VFG026065	Capsule I	33.06	363	240	3	28	387	28	390	5e-65	212
HM-7_03871	VFG045350	BslA	54.14	181	76	4	2	178	3	180	2e-64	196
HM-7_03876	VFG002177	Cytolysin	27.87	305	164	14	146	427	133	404	1e-11	65.9
HM-7_03893	VFG022029	ESX-3	37.58	298	166	5	30	311	300	593	5e-60	202
HM-7_03897	VFG026433	Glutamine synthesis	43.79	443	242	4	6	442	5	446	8e-118	351
HM-7_03935	VFG004775	Serine V8 protease	29.78	225	134	7	84	301	53	260	5e-20	87
HM-7_03970	VFG005951	Capsule	32.21	149	87	3	45	180	36	183	2e-17	75.9
HM-7_03992	VFG030243	MymA operon	27.35	234	147	6	81	302	66	288	3e-15	74.7
HM-7_03998	VFG027137	PhoP/R	26.07	326	201	13	162	466	161	467	2e-24	105
HM-7_03999	VFG031735	RegX3	40.95	210	117	2	24	230	20	225	1e-55	177
HM-7_04004	VFG030649	Trehalose-recycling ABC transporter	30.18	275	183	4	7	276	4	274	1e-32	120
HM-7_04005	VFG030565	Trehalose-recycling ABC transporter	31.02	274	180	4	35	306	18	284	9e-29	111
HM-7_04007	VFG045670	BopD	24.79	355	229	13	3	342	4	335	4e-18	83.6
HM-7_04020	VFG036966	FarAB	29.67	418	276	8	10	417	9	418	8e-36	139
HM-7_04026	VFG037205	Phospholipase D	27.2	478	256	17	55	463	83	537	1e-34	135
HM-7_04033	VFG030404	MymA operon	27.63	514	325	17	109	614	23	497	7e-36	141
HM-7_04039	VFG030400	MymA operon	33.26	487	291	8	51	535	1	455	7e-94	294
HM-7_04040	VFG044398	Pyridine-2,6-dithiocarboxylic acid	35.58	385	231	6	1	379	133	506	8e-68	222
HM-7_04054	VFG016417	Polysaccharide capsule	55.71	289	127	1	3	291	4	291	2e-116	336
HM-7_04060	VFG011808	LOS	39.42	137	67	5	37	158	45	180	4e-24	93.6
HM-7_04067	VFG017489	NuoG	23.01	678	388	26	23	691	236	788	3e-22	102
HM-7_04069	VFG026848	Nitrate/nitrite transporter	33.22	307	200	4	24	325	17	323	2e-34	131
HM-7_04072	VFG037474	Heme utilization	24.04	287	208	4	1	282	1	282	1e-16	78.2
HM-7_04073	VFG013253	LOS	30.17	484	333	3	88	569	99	579	1e-61	213
HM-7_04074	VFG013253	LOS	33.8	497	324	4	110	603	86	580	7e-74	247
HM-7_04079	VFG007814	Proline synthesis	33.93	280	155	5	3	255	18	294	4e-39	138
HM-7_04080	VFG030887	Cyp125	31.72	372	216	7	47	396	54	409	4e-57	192
HM-7_04107	VFG043453	Fibronectin-binding protein	32.58	132	82	3	2	127	3	133	2e-11	62.8
HM-7_04116	VFG009706	Iron-cofactored SOD	46.91	194	103	0	72	265	4	197	5e-60	189
HM-7_04122	VFG018399	SodCI	32.32	198	99	8	1	186	1	175	1e-18	79
HM-7_04123	VFG006734	Cell wall hydrolase	40.34	119	66	4	326	441	348	464	1e-16	81.6
HM-7_04149	VFG019760	Type IV pili biosynthesis	37.39	345	207	5	117	452	111	455	2e-59	201
HM-7_04150	VFG038028	Capsule	33.06	121	74	3	3	121	9	124	1e-11	65.1
HM-7_04154	VFG011804	LOS	28.12	224	151	4	8	229	3	218	1e-23	94.7
HM-7_04155	VFG038040	Capsule	46.21	132	70	1	9	140	1	131	3e-38	133
