# Supplementary material for: Comparative genomic analyses reveal genetic characteristics and pathogenic factors of Bacillus pumilus HM-7
Source: Front Microbiol. 2022 Nov 7;13:1008648. doi: 10.3389/fmicb.2022.1008648 (PMC9677121; doi:10.3389/fmicb.2022.1008648)
Supplement: Supplementary Table 5 — Gene identification in HM-7 using the PHI database. [file Table_5.xlsx]

## Sheet: HM-7.PHI.anno
Table S5 Gene identification in HM-7 using the PHI database.
Gene_ID	Accession	PHI-base_accession	Gene_name	Pathogen_NCBI_Taxonomy_ID	Pathogen_species	Phenotype_of_mutant	Identity(%)	Query Length	Mismatch	Gap	Query Start	Query End	Subject start	Subject end	Evalue	Score
HM-7_00006	Q0WF94	PHI:4185	Ypo2062	632	Yersinia_pestis	reduced_virulence	43.43	99	55	1	59	157	287	384	5e-20	91.7
HM-7_00154	D0Z9U0	PHI:3074	HupA	636	Edwardsiella_tarda	reduced_virulence	46.48	71	38	0	1	71	1	71	2e-17	68.6
HM-7_00185	Q0WF94	PHI:4185	Ypo2062	632	Yersinia_pestis	reduced_virulence	43.43	99	55	1	1567	1665	287	384	9e-20	92.8
HM-7_00212	Q3XXA5	PHI:5307	CapD	1352	Enterococcus_faecium	unaffected_pathogenicity	40.1	202	101	4	1	189	135	329	3e-43	145
HM-7_00213	P0A088	PHI:4582	MsrB	1280	Staphylococcus_aureus	unaffected_pathogenicity_reduced_virulence	63.57	129	46	1	11	138	8	136	4e-57	173
HM-7_00214	P0A086	PHI:4580	MsrA2	1280	Staphylococcus_aureus	unaffected_pathogenicity_reduced_virulence	60.69	173	68	0	5	177	3	175	4e-78	229
HM-7_00222	A0A4T9YUF5	PHI:10346	FakB2	1280	Staphylococcus_aureus	unaffected_pathogenicity	48.54	274	139	2	2	275	3	274	2e-77	235
HM-7_00224	G4MU34	PHI:3257	MoIlv1	318829	Magnaporthe_oryzae	reduced_virulence	35.98	403	238	8	25	415	128	522	6e-61	207
HM-7_00225	Q17ZY8	PHI:9139	PrdR	1496	Clostridioides_difficile	increased_virulence_(hypervirulence)	26.92	234	134	6	1	197	265	498	4e-19	86.3
HM-7_00228	Q5A5E0	PHI:10653	Dfr1	5476	Candida_albicans	reduced_virulence	35.95	153	78	7	2	135	6	157	6e-18	75.1
HM-7_00234	Q4X099	PHI:2638	Ilv3A	746128	Aspergillus_fumigatus	reduced_virulence	39.22	566	323	7	6	555	41	601	2e-120	366
HM-7_00235	Q5HFZ4	PHI:2967	CvfC	1280	Staphylococcus_aureus	reduced_virulence	43.4	371	206	4	1	369	1	369	1e-101	303
HM-7_00237	G4N178	PHI:2153_PHI:2356	MoHyr1_MoHYR1	318829	Magnaporthe_oryzae	reduced_virulence	52.8	161	73	1	2	159	6	166	5e-59	179
HM-7_00239	D4I2T4	PHI:9313	MetA	552	Erwinia_amylovora	reduced_virulence	47.16	299	158	0	1	299	1	299	1e-98	291
HM-7_00241	Q4UZ13	PHI:3962	XC_0630	339	Xanthomonas_campestris	reduced_virulence	56.03	232	99	3	1	230	26	256	1e-88	260
HM-7_00242	Q92AD0	PHI:7639	CspD	1639	Listeria_monocytogenes	reduced_virulence	83.08	65	11	0	1	65	1	65	2e-36	115
HM-7_00255	Q18C76	PHI:10938	PdaV_(CD630_15560)	1496	Clostridioides_difficile	increased_virulence_(hypervirulence)	32.08	240	151	3	50	281	33	268	5e-39	136
HM-7_00262	Q8Y614	PHI:5373	GpsB	1639	Listeria_monocytogenes	reduced_virulence	63.73	102	29	1	8	101	10	111	8e-40	126
HM-7_00267	A0A0H3KBS1	PHI:7917	NWMN_0826	1280	Staphylococcus_aureus	reduced_virulence	44.41	376	197	4	4	373	1	370	3e-113	333
HM-7_00268	A8Z0F5	PHI:6308	GlcA	1280	Staphylococcus_aureus	reduced_virulence	51.18	127	62	0	17	143	532	658	5e-40	141
HM-7_00280	I1RX22	PHI:1595	GzOB035	5518	Fusarium_graminearum	unaffected_pathogenicity	33.02	430	270	6	15	431	139	563	8e-74	239
HM-7_00284	Q4UTV7	PHI:3968	XC_2466	339	Xanthomonas_campestris	reduced_virulence	44.83	116	64	0	9	124	1	116	1e-30	105
HM-7_00285	Q0UHM8	PHI:2257	Pbl1	13684	Parastagonospora_nodorum	unaffected_pathogenicity	38.83	273	136	7	2	243	51	323	2e-49	166
HM-7_00298	Q6X9S4	PHI:835	Ubiquinol_oxidase	1047171	Zymoseptoria_tritici	chemistry_target:_resistance_to_chemical	34.24	184	119	2	39	222	27	208	5e-30	113
HM-7_00303	Q8E0U0	PHI:11573	AroA	1311	Streptococcus_agalactiae	reduced_virulence	50.59	427	205	5	1	424	1	424	2e-146	422
HM-7_00306	Q4X0J6	PHI:2517	TRPS	746128	Aspergillus_fumigatus	lethal	35.56	239	139	3	7	230	13	251	7e-51	176
HM-7_00307	Q4X0J6	PHI:2517	TRPS	746128	Aspergillus_fumigatus	lethal	57.73	388	161	3	10	396	341	726	3e-159	464
HM-7_00309	B2SL03	PHI:9984	TrpC_(PXO_04004)	347	Xanthomonas_oryzae	reduced_virulence	42.21	263	132	4	1	248	4	261	2e-61	192
HM-7_00311	Q4WLR6	PHI:7653	TrpA	746128	Aspergillus_fumigatus	reduced_virulence	37.13	509	272	10	20	505	34	517	1e-93	293
HM-7_00313	C5A9K4	PHI:4250	AroB	337	Burkholderia_glumae	reduced_virulence	40.59	372	194	8	1	358	1	359	7e-80	247
HM-7_00314	Q4WJ77	PHI:7654	AroB	746128	Aspergillus_fumigatus	reduced_virulence	33.61	366	203	11	1	343	8	356	1e-45	160
HM-7_00315	O87131	PHI:9031	CheR1	287	Pseudomonas_aeruginosa	reduced_virulence	34.68	248	144	8	4	238	11	253	9e-43	145
HM-7_00316	Q59636	PHI:6438	Ndk	287	Pseudomonas_aeruginosa	increased_virulence_(hypervirulence)	45.99	137	74	0	1	137	3	139	2e-45	143
HM-7_00318	W8TW76	PHI:10294	UbiE	1280	Staphylococcus_aureus	unaffected_pathogenicity	64.81	233	79	2	2	234	4	233	1e-111	318
HM-7_00322	Q8NL12	PHI:8676	HupB_(XAC1081)	346	Xanthomonas_citri	reduced_virulence	62.92	89	33	0	1	89	1	89	1e-34	112
HM-7_00326	A4VY17	PHI:9338	Pdh	1307	Streptococcus_suis	reduced_virulence	54.05	333	153	0	2	334	4	336	2e-130	374
HM-7_00327	A4VWD1	PHI:9270_PHI:11090	MnmE	1307	Streptococcus_suis	reduced_virulence	28.85	260	165	5	59	303	92	346	4e-20	90.5
HM-7_00333	Q9HV59	PHI:6080	Pnp	287	Pseudomonas_aeruginosa	reduced_virulence	58.33	72	29	1	273	344	623	693	3e-15	75.9
HM-7_00347	B9XXL6	PHI:8011	Rhpa	210	Helicobacter_pylori	reduced_virulence	20.57	418	281	13	13	409	39	426	3e-13	70.1
HM-7_00353	A0A0H3P9Y0	PHI:7198	Cjj81176_1228	197	Campylobacter_jejuni	loss_of_pathogenicity	42.73	110	54	3	44	151	235	337	2e-19	83.6
HM-7_00356	Q5HFT1	PHI:10535	SrrB	1280	Staphylococcus_aureus	increased_virulence_(hypervirulence)_reduced_virulence	34.81	566	340	8	33	587	34	581	2e-86	278
HM-7_00357	W8TTB7	PHI:10285	SrrA	1280	Staphylococcus_aureus	unaffected_pathogenicity	69.96	233	70	0	7	239	3	235	8e-121	342
HM-7_00360	Q04KT1	PHI:3912	Etrx2	1313	Streptococcus_pneumoniae	unaffected_pathogenicity	35.04	137	82	3	34	164	42	177	7e-23	88.6
HM-7_00371	Q9UVT8	PHI:11240	MoMca1_(MGG_04626)	318829	Magnaporthe_oryzae	reduced_virulence	31.28	179	85	2	13	153	16	194	3e-23	89
HM-7_00378	F5B5Y4	PHI:6206	BbCypC	176275	Beauveria_bassiana	unaffected_pathogenicity	43.57	140	70	3	15	145	14	153	6e-24	89.4
HM-7_00380	E0SEI0	PHI:8581	LysA_(Dda3937_02577)	204038	Dickeya_dadantii	reduced_virulence	31.22	426	248	16	26	432	19	418	3e-42	152
HM-7_00388	P95844	PHI:9446	SigB	1280	Staphylococcus_aureus	reduced_virulence_unaffected_pathogenicity	32.94	255	155	7	5	247	1	251	2e-37	130
HM-7_00396	Q2G282	PHI:4991	PerR	1280	Staphylococcus_aureus	reduced_virulence	26.9	145	101	2	1	145	8	147	3e-20	79.7
HM-7_00398	I1RGU8	PHI:5897	FGSG_02976	5518	Fusarium_graminearum	unaffected_pathogenicity	33.57	280	158	8	74	336	81	349	6e-30	117
HM-7_00402	Q9HU13	PHI:10783	PA5176	287	Pseudomonas_aeruginosa	reduced_virulence	31.78	129	86	1	44	172	47	173	4e-13	62.8
HM-7_00403	Q4V006	PHI:3947	XC_0281	339	Xanthomonas_campestris	reduced_virulence	30.38	316	184	11	4	292	5	311	2e-20	88.2
HM-7_00418	Q3Y1R2	PHI:5192	HMPREF0351_12112_(WxL_locusA)	1352	Enterococcus_faecium	reduced_virulence	27.51	458	298	15	1	442	1	440	4e-32	125
HM-7_00420	A0A076ZHT9	PHI:7511	VK055_1961	573	Klebsiella_pneumoniae	unaffected_pathogenicity	35.9	195	117	5	9	197	1	193	2e-28	107
HM-7_00425	A0A0H3KBS1	PHI:7917	NWMN_0826	1280	Staphylococcus_aureus	reduced_virulence	30.56	324	196	11	12	316	16	329	3e-31	119
HM-7_00430	A4VTH4	PHI:5300	AgaR2	1307	Streptococcus_suis	reduced_virulence	27.35	223	150	6	11	230	30	243	8e-21	86.3
HM-7_00431	A0A0H2ZQ21	PHI:6501	BglA3	1313	Streptococcus_pneumoniae	reduced_virulence	54.8	458	204	3	12	468	4	459	0	546
HM-7_00432	O50980	PHI:6529	ChbC	139	Borreliella_burgdorferi	unaffected_pathogenicity	34.16	442	264	8	3	424	5	439	1e-57	194
HM-7_00434	Q8E1M5	PHI:8620	Cel-EIIB_(SAG0329)	1311	Streptococcus_agalactiae	reduced_virulence	38	100	62	0	26	125	1	100	6e-16	67
HM-7_00436	Q8Y0J2	PHI:5271	FabG1	305	Ralstonia_solanacearum	lethal	35.18	253	154	5	1	250	1	246	7e-41	139
HM-7_00437	P60943	PHI:6311	GlcU	1280	Staphylococcus_aureus	reduced_virulence_unaffected_pathogenicity	44.23	260	144	1	1	259	4	263	2e-67	209
HM-7_00438	A0A384JMC8	PHI:9835	Bcpgd	40559	Botrytis_cinerea	reduced_virulence	51.33	452	217	3	6	455	10	460	6e-164	470
HM-7_00442	P0A964	PHI:6536	CheW	562	Escherichia_coli	unaffected_pathogenicity	25.36	138	99	2	2	136	15	151	9e-16	68.9
HM-7_00444	Q5HF73	PHI:10348	AccD	1280	Staphylococcus_aureus	reduced_virulence	31.34	201	102	6	33	207	61	251	2e-15	75.1
HM-7_00448	Q9K033	PHI:8623	Cab_(NMB0789)	487	Neisseria_meningitidis	unaffected_pathogenicity	50.41	246	115	1	1	239	1	246	3e-76	229
HM-7_00449	Q9K034	PHI:8622	Ctp_(NMB0788)	487	Neisseria_meningitidis	unaffected_pathogenicity	34.93	209	130	2	11	214	7	214	8e-29	106
HM-7_00450	Q2YKP4	PHI:7201	Bab2_0612	235	Brucella_abortus	reduced_virulence	30.67	225	147	6	34	250	25	248	7e-23	92.4
HM-7_00454	Q2FH26	PHI:7353	OdhB	1280	Staphylococcus_aureus	unaffected_pathogenicity	34.49	432	237	9	5	410	3	414	5e-61	202
HM-7_00455	A5IXN3	PHI:4610	PdhB	2110	Mycoplasmopsis_agalactiae	reduced_virulence	44.58	323	175	3	4	324	6	326	1e-92	277
HM-7_00456	Q1KSF2	PHI:3102	BCKDH	5811	Toxoplasma_gondii	reduced_virulence	37.37	281	170	4	12	289	111	388	5e-56	187
HM-7_00457	P9WHH9	PHI:7582	Rv0462_(lpdC)	1773	Mycobacterium_tuberculosis	increased_virulence_(hypervirulence)	41.26	475	264	8	3	474	2	464	9e-109	328
HM-7_00460	Q9KT08	PHI:9842	Pta	666	Vibrio_cholerae	unaffected_pathogenicity	23.99	271	168	7	15	254	403	666	6e-13	67.4
HM-7_00461	Q17ZY8	PHI:9139	PrdR	1496	Clostridioides_difficile	increased_virulence_(hypervirulence)	34.49	461	286	5	230	684	131	581	2e-72	243
HM-7_00467	Q9S1J0	PHI:3008	ZmpR	1313	Streptococcus_pneumoniae	unaffected_pathogenicity	37.76	98	55	2	28	122	28	122	8e-15	70.5
HM-7_00471	Q0PAS9	PHI:11322	Cj0588	197	Campylobacter_jejuni	reduced_virulence	38.38	185	107	3	62	245	73	251	1e-31	116
HM-7_00478	B1MKP3	PHI:9726	MAB_1247c	36809	Mycobacteroides_abscessus	reduced_virulence	31.53	111	70	2	17	122	30	139	8e-11	54.7
HM-7_00479	I1S2C4	PHI:5068	MCC	5518	Fusarium_graminearum	reduced_virulence	41.61	447	259	1	1	447	642	1086	7e-103	334
HM-7_00490	P64036	PHI:6420	EF-P	28901	Salmonella_enterica	increased_virulence_(hypervirulence)	42.78	180	103	0	5	184	7	186	1e-47	152
HM-7_00491	A0A0H3PAK7	PHI:10727	PepP_(CJJ81176_0681)	197	Campylobacter_jejuni	reduced_virulence	30.11	186	117	5	168	342	344	527	1e-13	70.1
HM-7_00498	A0A171JTK6	PHI:6512	LplA1	1639	Listeria_monocytogenes	reduced_virulence	26.09	276	166	8	8	278	3	245	1e-18	82.8
HM-7_00500	C5BAT0	PHI:2961	GcvP	67780	Edwardsiella_ictaluri	reduced_virulence	44.19	430	213	8	52	464	485	904	9e-95	306
HM-7_00501	C5BAT0	PHI:2961	GcvP	67780	Edwardsiella_ictaluri	reduced_virulence	36.69	357	209	5	4	355	17	361	1e-60	211
HM-7_00503	G2WUQ0	PHI:10379	Isw2	27337	Verticillium_dahliae	reduced_virulence	26.35	463	275	17	76	498	200	636	4e-30	124
HM-7_00517	B2IMM7	PHI:4707	CglB	1313	Streptococcus_pneumoniae	unaffected_pathogenicity	22.86	350	232	9	7	344	21	344	2e-15	74.7
HM-7_00518	A0A0U1YU79	PHI:6363	PilT	553	Pantoea_ananatis	reduced_virulence	39.22	153	84	2	131	274	118	270	1e-27	109
HM-7_00521	Q9RGX0	PHI:6967	SpxA1	1639	Listeria_monocytogenes	reduced_virulence_unaffected_pathogenicity	45.3	117	64	0	4	120	2	118	2e-37	122
HM-7_00523	A0A0E0UYV6	PHI:11648	GloB	1639	Listeria_monocytogenes	reduced_virulence_unaffected_pathogenicity	44.39	205	110	3	4	208	15	215	7e-55	172
HM-7_00528	W8TNJ3	PHI:5354	LtaS	1280	Staphylococcus_aureus	increased_virulence_(hypervirulence)	40.87	646	369	6	2	639	4	644	5e-167	490
HM-7_00529	I6Y8D3	PHI:2631	GLKA	1773	Mycobacterium_tuberculosis	reduced_virulence_unaffected_pathogenicity	31.65	278	175	5	9	283	6	271	4e-24	98.2
HM-7_00538	Q2FYQ0	PHI:9450_PHI:9760_PHI:11314	PstB	1280	Staphylococcus_aureus	unaffected_pathogenicity_reduced_virulence	61.29	248	96	0	13	260	36	283	4e-112	322
HM-7_00539	Q2FYQ0	PHI:9450_PHI:9760_PHI:11314	PstB	1280	Staphylococcus_aureus	unaffected_pathogenicity_reduced_virulence	58.87	248	102	0	23	270	36	283	2e-112	323
HM-7_00540	P9WG11	PHI:3635	Rv0930	1773	Mycobacterium_tuberculosis	unaffected_pathogenicity	38.78	147	85	2	71	215	98	241	5e-18	80.9
HM-7_00545	Q81LW0	PHI:9968	SodA1	1396	Bacillus_cereus	reduced_virulence	77.39	199	45	0	4	202	5	203	2e-116	328
HM-7_00554	Q2G282	PHI:4991	PerR	1280	Staphylococcus_aureus	reduced_virulence	32.86	140	87	4	3	138	12	148	5e-19	76.3
HM-7_00555	P39832	PHI:11006	ZnuB	562	Escherichia_coli	reduced_virulence	29.25	253	167	3	9	259	3	245	7e-17	77
HM-7_00556	W9B5Y9	PHI:7541	FepC_(VK055_1930)	573	Klebsiella_pneumoniae	reduced_virulence	35.89	209	128	2	11	216	13	218	9e-34	121
HM-7_00559	Q6FM27	PHI:3793	ANP1	5478	Candida_glabrata	increased_virulence_(hypervirulence)	32.2	264	171	4	3	261	13	273	2e-42	147
HM-7_00560	Q8Y755	PHI:7619	Lmo1450	1639	Listeria_monocytogenes	increased_virulence_(hypervirulence)	56.67	390	167	1	2	391	3	390	6e-170	482
HM-7_00566	O51804	PHI:9841	RpoS	666	Vibrio_cholerae	unaffected_pathogenicity	46.38	276	141	1	85	360	47	315	1e-79	246
HM-7_00575	P0C0B9	PHI:11438	BglB	1314	Streptococcus_pyogenes	increased_virulence_(hypervirulence)_reduced_virulence	63.64	297	107	1	6	301	2	298	1e-145	410
HM-7_00577	Q9A142	PHI:11439	BglP	1314	Streptococcus_pyogenes	increased_virulence_(hypervirulence)_reduced_virulence	37.98	129	77	2	1	126	1	129	1e-16	69.3
HM-7_00578	Q2YQS6	PHI:9125	YbeY_(bab1_2156)	235	Brucella_abortus	reduced_virulence	38.4	125	62	3	39	156	45	161	6e-21	82.4
HM-7_00588	A0A0H2JIX0	PHI:9452_PHI:9761	NptA	1280	Staphylococcus_aureus	unaffected_pathogenicity_reduced_virulence	33.22	301	196	2	13	308	18	318	8e-42	150
HM-7_00592	P95830	PHI:6986	DnaJ	1313	Streptococcus_pneumoniae	reduced_virulence	54.5	378	171	1	1	377	1	378	1e-128	372
HM-7_00593	A7U5U4	PHI:2058	LHS1	318829	Magnaporthe_oryzae	reduced_virulence	26.85	447	248	13	1	372	21	463	1e-26	114
HM-7_00597	A0A380PIP1	PHI:11030	BipA	632	Yersinia_pestis	reduced_virulence	29.71	552	302	22	14	523	5	512	9e-52	186
HM-7_00613	A0A3A5M417	PHI:10287	AroE	1280	Staphylococcus_aureus	unaffected_pathogenicity_increased_virulence_(hypervirulence)	35.14	276	165	4	5	277	3	267	3e-52	170
HM-7_00618	Q8Y9V5	PHI:4689	PgdA	1639	Listeria_monocytogenes	reduced_virulence	30.93	194	114	5	46	233	266	445	9e-19	83.2
HM-7_00620	O51804	PHI:9841	RpoS	666	Vibrio_cholerae	unaffected_pathogenicity	25.69	253	138	6	21	223	62	314	4e-18	80.5
HM-7_00623	Q66EI1	PHI:3135	PdhR	633	Yersinia_pseudotuberculosis	reduced_virulence	27.66	235	154	5	4	226	1	231	4e-20	84.3
HM-7_00625	I1RDG6	PHI:1555	GzMyb019	5518	Fusarium_graminearum	unaffected_pathogenicity	26.19	252	166	5	7	240	74	323	1e-18	86.7
HM-7_00626	Q8Y0J2	PHI:5271	FabG1	305	Ralstonia_solanacearum	lethal	42.34	248	139	2	4	251	5	248	6e-58	183
HM-7_00628	Q8MPM3	PHI:8028	Tkt	5665	Leishmania_mexicana	loss_of_pathogenicity	33.33	255	155	6	6	247	1	253	2e-34	129
HM-7_00632	Q8Y9V5	PHI:4689	PgdA	1639	Listeria_monocytogenes	reduced_virulence	41.54	195	110	1	261	455	255	445	1e-46	166
HM-7_00639	Q44135	PHI:8050	CpxA	715	Actinobacillus_pleuropneumoniae	reduced_virulence	25.23	218	147	2	4	221	2	203	4e-16	72.8
HM-7_00643	Q83EH4	PHI:9510	CBU_0347	777	Coxiella_burnetii	unaffected_pathogenicity	37.61	436	270	2	10	444	20	454	1e-65	216
HM-7_00648	I3U3N8	PHI:4564	CcpA	1352	Enterococcus_faecium	reduced_virulence	23.91	276	185	7	83	350	71	329	8e-19	84.7
HM-7_00649	Q6PT92	PHI:6133	BlaCMY-2	28901	Salmonella_enterica	reduced_virulence	24.19	372	200	15	8	324	32	376	3e-23	97.4
HM-7_00668	W8U4S5	PHI:10293_PHI:10292	CtaB	1280	Staphylococcus_aureus	unaffected_pathogenicity_increased_virulence_(hypervirulence)	38.7	292	177	2	6	296	9	299	2e-49	165
HM-7_00670	G5EHZ3	PHI:9055	MoIVD_(MGG_02540)	318829	Magnaporthe_oryzae	reduced_virulence	23.41	346	249	7	24	360	104	442	2e-14	72.8
HM-7_00671	Q9K033	PHI:8623	Cab_(NMB0789)	487	Neisseria_meningitidis	unaffected_pathogenicity	51.82	247	115	2	1	243	1	247	8e-88	259
HM-7_00673	Q9K034	PHI:8622	Ctp_(NMB0788)	487	Neisseria_meningitidis	unaffected_pathogenicity	35.71	210	117	5	19	223	18	214	6e-31	112
HM-7_00674	Q9K034	PHI:8622	Ctp_(NMB0788)	487	Neisseria_meningitidis	unaffected_pathogenicity	37.05	224	123	3	13	231	7	217	1e-39	134
HM-7_00675	Q8XDQ1	PHI:7042	KatN	562	Escherichia_coli	effector_(plant_avirulence_determinant)	32.16	255	156	7	1	253	1	240	2e-35	127
HM-7_00676	Q0UA24	PHI:2256	Xdh1	13684	Parastagonospora_nodorum	unaffected_pathogenicity	32.02	331	205	7	23	343	37	357	4e-40	143
HM-7_00678	Q8Y0J2	PHI:5271	FabG1	305	Ralstonia_solanacearum	lethal	29.46	224	153	2	3	222	5	227	2e-29	109
HM-7_00679	A0A116Q7Z1	PHI:8932	AdhE	1307	Streptococcus_suis	reduced_virulence	36	275	156	6	36	294	495	765	2e-42	157
HM-7_00680	A0A378CFB4	PHI:11408	YaaA	573	Klebsiella_pneumoniae	reduced_virulence	36.9	252	151	4	213	456	1	252	9e-30	120
HM-7_00681	Q8ZNK8	PHI:11609	YeiE	28901	Salmonella_enterica	reduced_virulence	26.71	292	201	5	3	290	5	287	3e-27	105
HM-7_00682	Q9A0J8	PHI:11076	ScfE_(Spy0746)	1314	Streptococcus_pyogenes	unaffected_pathogenicity_reduced_virulence	26.92	130	93	2	213	341	211	339	7e-13	67.4
HM-7_00683	Q9A0J9	PHI:11075	ScfD_(Spy0745)	1314	Streptococcus_pyogenes	reduced_virulence	24.88	209	131	3	185	379	173	369	6e-14	70.9
HM-7_00684	Q8DPC2	PHI:6319	PotA	1313	Streptococcus_pneumoniae	reduced_virulence	29.03	217	150	3	1	214	5	220	3e-31	119
HM-7_00685	Q0UA24	PHI:2256	Xdh1	13684	Parastagonospora_nodorum	unaffected_pathogenicity	31.32	281	153	10	4	278	14	260	2e-21	93.2
HM-7_00691	A0A0K0GQB7	PHI:9986	MetB_(PXO_03157)	347	Xanthomonas_oryzae	reduced_virulence	54.52	365	153	4	5	361	19	378	2e-140	404
HM-7_00692	Q4X256	PHI:6556	MecA	746128	Aspergillus_fumigatus	unaffected_pathogenicity_reduced_virulence	37.99	308	177	4	7	300	17	324	5e-49	169
HM-7_00693	O51534	PHI:8919	Bgp_(BB_0588)	139	Borreliella_burgdorferi	reduced_virulence	34.3	242	143	7	1	229	26	264	2e-35	125
HM-7_00698	P64281	PHI:7130	GreA	28901	Salmonella_enterica	loss_of_pathogenicity	44.16	154	84	1	5	156	2	155	6e-32	110
HM-7_00700	P56113	PHI:6964	Hp0169	210	Helicobacter_pylori	reduced_virulence	36.49	296	179	6	23	312	5	297	4e-54	184
HM-7_00701	P56113	PHI:6964	Hp0169	210	Helicobacter_pylori	reduced_virulence	29.82	275	175	9	7	268	6	275	8e-25	101
HM-7_00704	Q4WCL5	PHI:2529	ERG10	746128	Aspergillus_fumigatus	lethal	32.82	393	225	9	5	361	9	398	2e-42	150
HM-7_00705	Q8ZPS2	PHI:9092	YdiD	28901	Salmonella_enterica	reduced_virulence	22.91	515	344	15	11	481	34	539	2e-29	119
HM-7_00707	Q8DRE1	PHI:3148	Spr0177	1313	Streptococcus_pneumoniae	lethal	45.98	87	42	3	8	89	15	101	9e-20	75.1
HM-7_00709	Q8CZ89	PHI:3155	Spr0175	1313	Streptococcus_pneumoniae	reduced_virulence	56.47	85	36	1	1	85	1	84	8e-31	102
HM-7_00712	Q9K033	PHI:8623	Cab_(NMB0789)	487	Neisseria_meningitidis	unaffected_pathogenicity	50	246	116	1	1	239	1	246	3e-79	237
HM-7_00713	Q87XK7	PHI:10621	AatJ_(PSPTO_4171)	317	Pseudomonas_syringae	reduced_virulence	31.95	241	152	4	38	267	29	268	2e-27	105
HM-7_00714	Q9K034	PHI:8622	Ctp_(NMB0788)	487	Neisseria_meningitidis	unaffected_pathogenicity	38.14	194	111	2	31	215	23	216	9e-32	114
HM-7_00715	Q9K034	PHI:8622	Ctp_(NMB0788)	487	Neisseria_meningitidis	unaffected_pathogenicity	37.58	165	102	1	50	214	50	213	3e-31	112
HM-7_00722	A0A0F6B0W7	PHI:10102	STM14_RS07720_(sufS)	28901	Salmonella_enterica	reduced_virulence	27.25	389	235	14	5	366	26	393	4e-23	98.2
HM-7_00723	Q667Y0	PHI:3043_PHI:7900	IscR	633	Yersinia_pseudotuberculosis	reduced_virulence	32.09	134	85	2	1	128	1	134	3e-19	77.4
HM-7_00724	A0A164J6A6	PHI:6447	RarA	573	Klebsiella_pneumoniae	reduced_virulence	39.42	416	245	4	1	410	13	427	5e-92	283
HM-7_00726	J5K1T7	PHI:9409	Krs_(BBA_03037)	176275	Beauveria_bassiana	reduced_virulence	26.79	265	169	8	24	273	135	389	2e-17	84.3
HM-7_00729	P36548	PHI:10979	AmiA	562	Escherichia_coli	reduced_virulence	28.44	218	110	3	354	525	59	276	2e-25	104
HM-7_00731	A0A0B6XPF7	PHI:11284	Rsh	1280	Staphylococcus_aureus	reduced_virulence_unaffected_pathogenicity	59.65	736	290	4	1	736	8	736	0	915
HM-7_00745	A0A164J6A6	PHI:6447	RarA	573	Klebsiella_pneumoniae	reduced_virulence	33.81	139	71	5	10	136	9	138	6e-12	64.3
HM-7_00757	Q83F48	PHI:8507	NadB	777	Coxiella_burnetii	reduced_virulence	38.14	506	287	9	7	488	6	509	1e-97	304
HM-7_00774	B2IQ18	PHI:4701	RadC	1313	Streptococcus_pneumoniae	reduced_virulence	43.81	210	118	0	17	226	18	227	1e-58	183
HM-7_00777	O68839	PHI:702	VcpD	666	Vibrio_cholerae	reduced_virulence	26.74	258	155	4	10	233	19	276	7e-19	82
HM-7_00778	Q3IZC2	PHI:10842	RSp0930	305	Ralstonia_solanacearum	effector_(plant_avirulence_determinant)	31.4	414	254	10	24	426	25	419	3e-48	169
HM-7_00783	Q4UYA7	PHI:3950	XC_0892	339	Xanthomonas_campestris	reduced_virulence	52.82	426	200	1	4	428	2	427	7e-167	474
HM-7_00794	Q9KQS8	PHI:6583	LonA	666	Vibrio_cholerae	reduced_virulence	55.64	762	335	3	9	769	11	770	0	851
HM-7_00795	A0A0F6AXS9	PHI:8808	Lon	28901	Salmonella_enterica	increased_virulence_(hypervirulence)	28.39	472	263	19	93	537	352	775	4e-26	111
HM-7_00796	A6QHK8	PHI:3004	ClpX	1280	Staphylococcus_aureus	reduced_virulence	71.8	422	116	3	1	421	1	420	0	573
HM-7_00799	B2SNH3	PHI:9980	LeuD_(PXO_02612)	347	Xanthomonas_oryzae	reduced_virulence	53.81	210	84	3	1	197	1	210	7e-71	213
HM-7_00800	W9BBU8	PHI:8964	LeuC	573	Klebsiella_pneumoniae	reduced_virulence	59.57	465	187	1	1	464	1	465	0	567
HM-7_00801	A0A0K0GP65	PHI:9979	LeuB_(PXO_02610)	347	Xanthomonas_oryzae	reduced_virulence	57.42	357	152	0	1	357	1	357	4e-135	388
HM-7_00802	B5Y1W2	PHI:8962	LeuA	573	Klebsiella_pneumoniae	reduced_virulence	46.08	497	266	1	2	498	3	497	4e-150	438
HM-7_00803	Q04M32	PHI:11426	IlvC_(SPD_0406)	1313	Streptococcus_pneumoniae	reduced_virulence	61.04	326	127	0	2	327	3	328	1e-141	403
HM-7_00804	G4NC97	PHI:3976	MoIlv6	318829	Magnaporthe_oryzae	loss_of_pathogenicity	39.56	91	54	1	2	92	81	170	3e-15	70.1
HM-7_00805	Q6SSJ3	PHI:358	ILV2	5207	Cryptococcus_neoformans	loss_of_pathogenicity	44.97	587	285	12	18	570	126	708	3e-161	476
HM-7_00809	O68578	PHI:10260	DltD	1309	Streptococcus_mutans	reduced_virulence	30.15	388	255	8	6	384	9	389	2e-51	176
HM-7_00812	Q99ZA6	PHI:8561	DltA_(M5005_Spy_1073)	1314	Streptococcus_pyogenes	reduced_virulence	43.28	506	277	7	3	499	5	509	9e-135	398
HM-7_00822	A0A3L8GGZ3	PHI:10409	MurI	1346	Streptococcus_iniae	reduced_virulence	47.6	271	127	6	2	268	3	262	2e-82	246
HM-7_00824	Q6DL91	PHI:4690	DegU	1639	Listeria_monocytogenes	reduced_virulence	50	60	30	0	11	70	164	223	3e-14	62.8
HM-7_00826	A0A0H3KEX5	PHI:5242	CcpE	1280	Staphylococcus_aureus	increased_virulence_(hypervirulence)	32.28	285	187	4	1	283	1	281	4e-43	147
HM-7_00830	P07014	PHI:7965	SdhB	562	Escherichia_coli	reduced_virulence	27.5	240	150	9	7	235	3	229	3e-18	79.7
HM-7_00831	C5BDL7	PHI:2960	FrdA	67780	Edwardsiella_ictaluri	reduced_virulence	34.54	579	343	13	29	586	33	596	4e-92	293
HM-7_00834	W7MS01	PHI:3389	FVEG_12521	117187	Fusarium_verticillioides	unaffected_pathogenicity	28.76	306	179	9	124	398	205	502	3e-20	90.9
HM-7_00836	P0A4L3	PHI:7258	TrxA	1639	Listeria_monocytogenes	reduced_virulence	67.35	98	32	0	7	104	6	103	6e-42	131
HM-7_00838	Q4UQL6	PHI:3957	XC_3615	339	Xanthomonas_campestris	reduced_virulence	46.75	231	113	6	93	319	90	314	3e-54	178
HM-7_00839	A0A0F6AZ25	PHI:7211	STM14_1002	28901	Salmonella_enterica	reduced_virulence	31.54	260	164	5	1	257	36	284	7e-25	98.6
HM-7_00840	Q9I5I4	PHI:7979	DspI	287	Pseudomonas_aeruginosa	reduced_virulence	36.61	254	158	3	5	257	19	270	1e-36	129
HM-7_00842	A0A0H2ZCP3	PHI:10606	FadD1_(PA14_21370)	287	Pseudomonas_aeruginosa	unaffected_pathogenicity	37.3	555	324	12	12	558	20	558	1e-111	343
HM-7_00845	Q5KN74	PHI:7207	Msh2	5207	Cryptococcus_neoformans	unaffected_pathogenicity	34.29	175	109	5	301	470	649	822	1e-16	82.8
HM-7_00854	Q8ZR28	PHI:7577	CstA	28901	Salmonella_enterica	reduced_virulence	44.54	568	286	7	1	540	32	598	8e-138	416
HM-7_00863	Q9I3S1	PHI:3041	BdlA	287	Pseudomonas_aeruginosa	reduced_virulence_loss_of_pathogenicity	39.38	226	134	1	14	236	118	343	4e-30	116
HM-7_00869	P67320	PHI:3464	NrdR	1314	Streptococcus_pyogenes	unaffected_pathogenicity_reduced_virulence	52	150	68	1	1	150	1	146	4e-57	174
HM-7_00872	P0A038	PHI:6904	GAPDH	1280	Staphylococcus_aureus	reduced_virulence	46.92	341	170	5	1	335	1	336	1e-94	283
HM-7_00875	P9WNC3	PHI:3627	Rv2924c	1773	Mycobacterium_tuberculosis	unaffected_pathogenicity	32.18	289	181	5	1	276	1	287	2e-45	153
HM-7_00877	Q2G2U4	PHI:7739	WalK	1280	Staphylococcus_aureus	reduced_virulence	31.84	468	293	8	121	577	144	596	1e-61	213
HM-7_00878	S4E4Q5	PHI:11131	WalR	1351	Enterococcus_faecalis	increased_virulence_(hypervirulence)	56.12	237	98	2	3	239	2	232	5e-83	246
HM-7_00879	Q838C9	PHI:4140	Ldh-2	1351	Enterococcus_faecalis	unaffected_pathogenicity_reduced_virulence	35.54	287	174	5	31	311	32	313	5e-43	148
HM-7_00885	A0A0F6B0X2	PHI:10107	STM14_RS07745_(pykF)	28901	Salmonella_enterica	reduced_virulence	52.63	475	218	5	1	473	1	470	2e-168	485
HM-7_00886	D4HUC7	PHI:9309	PfkA	552	Erwinia_amylovora	reduced_virulence	57.28	302	129	0	1	302	2	303	2e-127	365
HM-7_00888	Q5HF73	PHI:10348	AccD	1280	Staphylococcus_aureus	reduced_virulence	60.36	280	108	2	3	280	2	280	2e-124	355
HM-7_00894	Q8Y6V6	PHI:10731	Lmo1575	1639	Listeria_monocytogenes	reduced_virulence	53.38	311	144	1	1	311	1	310	8e-122	350
HM-7_00896	Q8DPV2	PHI:3157	Spr0991	1313	Streptococcus_pneumoniae	reduced_virulence	35.14	444	257	5	3	436	2	424	3e-86	268
HM-7_00898	Q8Y0J2	PHI:5271	FabG1	305	Ralstonia_solanacearum	lethal	31.15	244	159	6	49	290	10	246	8e-26	101
HM-7_00900	Q2FIB5	PHI:2632	ArgH	1280	Staphylococcus_aureus	reduced_virulence	58.55	456	189	0	2	457	3	458	0	574
HM-7_00901	D4HUG4	PHI:9316	ArgG	552	Erwinia_amylovora	reduced_virulence	43.36	399	220	5	5	398	7	404	2e-95	290
HM-7_00903	A0A0H3Q0Y8	PHI:9843	AckA	666	Vibrio_cholerae	unaffected_pathogenicity	44.08	397	216	6	1	393	1	395	1e-101	305
HM-7_00911	Q8Y7M8	PHI:7618	Lmo1246	1639	Listeria_monocytogenes	reduced_virulence_increased_virulence_(hypervirulence)	54.74	475	207	4	6	479	1	468	0	538
HM-7_00913	A0A0H2UX24	PHI:6507	LiaS	1314	Streptococcus_pyogenes	reduced_virulence	27.23	202	125	8	177	365	131	323	2e-13	68.9
HM-7_00914	A0A0H3JRA8	PHI:6673	SAV1322	1280	Staphylococcus_aureus	reduced_virulence	41.21	199	115	1	1	197	1	199	2e-47	152
HM-7_00916	A0A0E0UWL3	PHI:9214	VirR	1639	Listeria_monocytogenes	reduced_virulence_unaffected_pathogenicity	47.98	223	115	1	1	222	1	223	1e-75	226
HM-7_00917	Q2G0D9	PHI:7740	GraS	1280	Staphylococcus_aureus	reduced_virulence	37.73	326	202	1	5	329	10	335	3e-58	189
HM-7_00920	A0A0H3JS81	PHI:6579	VraD	1280	Staphylococcus_aureus	reduced_virulence	57.94	252	105	1	1	252	1	251	4e-104	301
HM-7_00921	A0A0H3JUP1	PHI:6580	VraE	1280	Staphylococcus_aureus	reduced_virulence	33.28	649	406	10	1	645	1	626	4e-100	317
HM-7_00927	P27550	PHI:9227	Acs	562	Escherichia_coli	reduced_virulence_unaffected_pathogenicity	28.14	526	330	12	27	511	92	610	6e-52	186
HM-7_00930	A0A0F6B0W7	PHI:10102	STM14_RS07720_(sufS)	28901	Salmonella_enterica	reduced_virulence	22.19	347	243	10	1	325	24	365	8e-17	79.7
HM-7_00931	A0A0H2WXT5	PHI:6629	BrnQ1	1280	Staphylococcus_aureus	unaffected_pathogenicity_reduced_virulence	40.05	432	246	6	1	423	1	428	8e-76	242
HM-7_00932	W8TWD5	PHI:10292	BrnQ2	1280	Staphylococcus_aureus	unaffected_pathogenicity	37.27	432	254	6	26	445	21	447	1e-71	231
HM-7_00944	P27550	PHI:9227	Acs	562	Escherichia_coli	reduced_virulence_unaffected_pathogenicity	37.35	581	333	12	20	574	53	628	4e-118	362
HM-7_00947	J9VS57	PHI:8015	Clr62_(CNAG_05276)	5207	Cryptococcus_neoformans	reduced_virulence	35.89	287	173	6	53	337	113	390	3e-43	157
HM-7_00948	I3U3N8	PHI:4564	CcpA	1352	Enterococcus_faecium	reduced_virulence	59.09	330	133	2	4	333	12	339	2e-139	397
HM-7_00954	Q8YAQ5	PHI:7805	EssC_(lmo0061)	1639	Listeria_monocytogenes	increased_virulence_(hypervirulence)	33.33	216	135	5	572	780	631	844	8e-25	110
HM-7_00970	Q4X256	PHI:6556	MecA	746128	Aspergillus_fumigatus	unaffected_pathogenicity_reduced_virulence	41.29	310	166	5	8	304	17	323	2e-53	181
HM-7_00972	Q97NA0	PHI:3477	ArcT	1313	Streptococcus_pneumoniae	reduced_virulence	36.01	461	261	11	11	465	10	442	3e-86	270
HM-7_00973	D4I4J9	PHI:10919	EaAdeP_(EAMY_3685)	552	Erwinia_amylovora	reduced_virulence	41.89	413	233	3	1	412	10	416	2e-103	313
HM-7_00987	A0A0H2URB2	PHI:7678	SatB	1313	Streptococcus_pneumoniae	reduced_virulence	24.16	269	191	6	35	298	18	278	2e-12	65.1
HM-7_00991	J4VZT4	PHI:9444	Bbakr1_(XP_008600433.1)	176275	Beauveria_bassiana	unaffected_pathogenicity	48.86	264	133	1	10	271	39	302	8e-77	234
HM-7_00993	A0A0H2UR33	PHI:7679	SatC	1313	Streptococcus_pneumoniae	reduced_virulence	25.66	265	180	3	30	292	30	279	5e-29	110
HM-7_00998	Q4ZSY3	PHI:7700	Lov	317	Pseudomonas_syringae	unaffected_pathogenicity	40.65	123	73	0	19	141	27	149	4e-32	122
HM-7_01001	Q8ZQE4	PHI:3928	MacB	28901	Salmonella_enterica	reduced_virulence	46.8	203	107	1	19	221	18	219	7e-58	192
HM-7_01003	Q53763	PHI:6324	StpC	1280	Staphylococcus_aureus	unaffected_pathogenicity	29.03	217	143	5	1	215	3	210	3e-19	82.8
HM-7_01004	W8UWD7	PHI:10290	YhcF	1280	Staphylococcus_aureus	unaffected_pathogenicity_increased_virulence_(hypervirulence)	37.61	109	68	0	8	116	9	117	4e-20	78.2
HM-7_01014	D4HYW4	PHI:9327	AsnB	552	Erwinia_amylovora	unaffected_pathogenicity	31.44	404	223	10	1	384	1	370	1e-52	187
HM-7_01015	G4NCL5	PHI:877	MGG_00383	318829	Magnaporthe_oryzae	reduced_virulence	54.31	383	161	3	7	386	17	388	1e-147	422
HM-7_01016	F5HAA8	PHI:424	PCK1	5207	Cryptococcus_neoformans	reduced_virulence	49.91	529	249	7	5	523	20	542	8e-161	467
HM-7_01024	C0RL06	PHI:11542	B0446	29459	Brucella_melitensis	unaffected_pathogenicity	36.24	218	135	1	4	221	3	216	3e-49	161
HM-7_01028	Q4UZ13	PHI:3962	XC_0630	339	Xanthomonas_campestris	reduced_virulence	34.91	212	113	11	13	215	56	251	1e-23	94.7
HM-7_01035	Q836D3	PHI:4577	AI-2	1351	Enterococcus_faecalis	increased_virulence_(hypervirulence)	45.58	147	74	2	1	147	1	141	2e-39	129
HM-7_01038	Q9A0L9	PHI:9798	AdcA	1314	Streptococcus_pyogenes	reduced_virulence_unaffected_pathogenicity	30.59	304	208	1	26	329	21	321	3e-46	162
HM-7_01041	A6QFU3	PHI:4037	CydB	1280	Staphylococcus_aureus	reduced_virulence	34.4	343	216	4	9	350	4	338	5e-24	99.4
HM-7_01045	Q8ZPS2	PHI:9092	YdiD	28901	Salmonella_enterica	reduced_virulence	29.54	501	316	10	11	476	34	532	3e-57	197
HM-7_01046	I1S8D3	PHI:9517	FgEch1_(FGSG_13111)	5518	Fusarium_graminearum	reduced_virulence	29.96	267	176	5	9	267	26	289	3e-26	102
HM-7_01048	A0A390C306	PHI:10275	MenD	1280	Staphylococcus_aureus	increased_virulence_(hypervirulence)	41.46	574	311	15	6	578	8	557	2e-124	376
HM-7_01049	Q51508	PHI:5057_PHI:6988	PchA	287	Pseudomonas_aeruginosa	unaffected_pathogenicity_loss_of_pathogenicity	33.19	473	268	11	16	468	21	465	1e-76	246
HM-7_01050	Q8Y6K7	PHI:10729	MenA	1639	Listeria_monocytogenes	reduced_virulence	50.35	288	143	0	11	298	7	294	6e-86	259
HM-7_01081	P9WN99	PHI:7982	RodA	1773	Mycobacterium_tuberculosis	unaffected_pathogenicity_reduced_virulence	28.41	345	213	10	43	371	115	441	2e-25	105
HM-7_01082	P9WN99	PHI:7982	RodA	1773	Mycobacterium_tuberculosis	unaffected_pathogenicity_reduced_virulence	31.96	291	180	6	101	377	169	455	5e-27	110
HM-7_01086	A0A116Q7Z1	PHI:8932	AdhE	1307	Streptococcus_suis	reduced_virulence	31.2	375	222	9	37	380	488	857	6e-41	152
HM-7_01087	Q882F5	PHI:7788	AldB_(PSPTO_2673)	317	Pseudomonas_syringae	reduced_virulence	43.57	482	267	2	1	479	1	480	4e-128	380
HM-7_01138	Q87WK5	PHI:10942	PSPTO_4541	317	Pseudomonas_syringae	unaffected_pathogenicity	33.52	358	208	4	303	659	212	540	1e-30	125
HM-7_01139	Q87WK5	PHI:10942	PSPTO_4541	317	Pseudomonas_syringae	unaffected_pathogenicity	31.82	352	196	5	314	657	225	540	7e-24	104
HM-7_01140	Q87WK5	PHI:10942	PSPTO_4541	317	Pseudomonas_syringae	unaffected_pathogenicity	32.03	359	213	7	277	630	181	513	2e-28	118
HM-7_01141	A0A0F6B845	PHI:6980	Tcp	28901	Salmonella_enterica	reduced_virulence	28.41	352	196	5	311	662	221	516	6e-22	98.2
HM-7_01153	A0A116Q7Z1	PHI:8932	AdhE	1307	Streptococcus_suis	reduced_virulence	26.33	300	200	10	9	295	473	764	5e-19	87.4
HM-7_01154	A0A116Q7Z1	PHI:8932	AdhE	1307	Streptococcus_suis	reduced_virulence	26.79	280	165	9	46	303	507	768	3e-15	76.3
HM-7_01156	A0A0H2ZPW2	PHI:11468	SPD_1366_(CvfD)	1313	Streptococcus_pneumoniae	reduced_virulence	47.37	76	40	0	6	81	2	77	8e-15	64.3
HM-7_01157	A0A0K0GPI8	PHI:9989	AspC_(PXO_02420)	347	Xanthomonas_oryzae	reduced_virulence	30.1	402	257	10	3	386	12	407	2e-46	163
HM-7_01158	A0A2T0ANK5	PHI:9701	Lrp	1496	Clostridioides_difficile	increased_virulence_(hypervirulence)	47.62	147	76	1	15	161	9	154	2e-41	134
HM-7_01161	A0A0F6B1M0	PHI:7225	YdcR	28901	Salmonella_enterica	reduced_virulence	23.08	299	207	10	78	367	160	444	2e-11	63.2
HM-7_01162	Q9HV74	PHI:3440	CbrA	287	Pseudomonas_aeruginosa	reduced_virulence_unaffected_pathogenicity	30.49	246	156	7	190	425	735	975	2e-29	119
HM-7_01166	C0RLS8	PHI:11544	B0754	29459	Brucella_melitensis	unaffected_pathogenicity	36.5	389	227	8	14	391	112	491	1e-54	186
HM-7_01171	P36556	PHI:4497	PmrA	28901	Salmonella_enterica	increased_virulence_(hypervirulence)	32.79	122	78	3	2	122	1	119	2e-14	68.2
HM-7_01173	P77257	PHI:9992	LsrA	562	Escherichia_coli	reduced_virulence	32.79	488	289	8	9	479	16	481	3e-73	239
HM-7_01178	A6QFG2	PHI:7818	MnhA1	1280	Staphylococcus_aureus	reduced_virulence	52.76	779	359	4	1	777	1	772	0	726
HM-7_01181	A6QFG2	PHI:7818	MnhA1	1280	Staphylococcus_aureus	reduced_virulence	27.27	330	224	5	88	403	90	417	3e-26	111
HM-7_01185	Q8XBU9	PHI:6270	YbdB	562	Escherichia_coli	lethal	42.06	126	72	1	1	126	12	136	2e-16	68.9
HM-7_01186	Q7A4R9	PHI:8948	VraR	1280	Staphylococcus_aureus	increased_virulence_(hypervirulence)	32.68	205	132	2	3	207	4	202	2e-26	99.4
HM-7_01187	A0A0K2E3Q5	PHI:7985	VraS	1307	Streptococcus_suis	reduced_virulence	29.05	210	132	6	566	770	127	324	1e-17	83.2
HM-7_01206	Q8YAQ5	PHI:7805	EssC_(lmo0061)	1639	Listeria_monocytogenes	increased_virulence_(hypervirulence)	36.94	1508	859	28	25	1480	26	1493	0	917
HM-7_01207	P0C053	PHI:6220	EssB	1280	Staphylococcus_aureus	reduced_virulence	21.09	294	226	4	80	371	90	379	9e-14	71.2
HM-7_01209	Q8YAR0	PHI:7803	EsxA_(lmo0056)	1639	Listeria_monocytogenes	effector_(plant_avirulence_determinant)	39.13	92	56	0	1	92	1	92	1e-20	77.4
HM-7_01219	W8US24	PHI:10277	NdhC	1280	Staphylococcus_aureus	increased_virulence_(hypervirulence)	52.33	386	182	2	2	386	4	388	4e-144	414
HM-7_01220	A7EKQ2	PHI:8883	SsTrr1_(SS1G_05899)	5180	Sclerotinia_sclerotiorum	reduced_virulence	26.32	304	199	11	10	301	5	295	3e-17	79.7
HM-7_01226	Q9HVN9	PHI:8939	Ndh_(PA4538)	287	Pseudomonas_aeruginosa	reduced_virulence_unaffected_pathogenicity	25.98	331	186	9	31	306	33	359	4e-27	109
HM-7_01229	Q2FID9	PHI:3348	Nfu	1280	Staphylococcus_aureus	reduced_virulence	81.36	59	11	0	6	64	8	66	3e-31	102
HM-7_01241	Q2FIE9	PHI:9458	LipA_(SAUSA300_0829)	1280	Staphylococcus_aureus	reduced_virulence	80.74	296	57	0	3	298	4	299	0	519
HM-7_01250	A7EU07	PHI:4508	Ss-odc1	5180	Sclerotinia_sclerotiorum	unaffected_pathogenicity	45.26	380	201	5	9	382	72	450	2e-124	365
HM-7_01251	C0RLS8	PHI:11544	B0754	29459	Brucella_melitensis	unaffected_pathogenicity	24.52	367	251	9	7	357	99	455	5e-11	62.4
HM-7_01256	P15029	PHI:8009	FecD	562	Escherichia_coli	reduced_virulence	40.97	310	176	5	35	343	15	318	3e-48	163
HM-7_01257	W9BNM7	PHI:7483	FepD_(VK055_1928)	573	Klebsiella_pneumoniae	unaffected_pathogenicity_reduced_virulence	37.99	308	189	2	31	338	29	334	5e-45	155
HM-7_01260	Q2FV90	PHI:10168	FphB_(SAOUHSC_02844)	1280	Staphylococcus_aureus	reduced_virulence_unaffected_pathogenicity	34.85	307	172	7	2	291	26	321	2e-53	176
HM-7_01263	A0A0K2E6P6	PHI:10809	WalR	1307	Streptococcus_suis	reduced_virulence	42.73	227	125	3	4	226	3	228	8e-49	158
HM-7_01270	A0A0F6B0W4	PHI:6893_PHI:10099	SufB_STM14_RS07705_(sufB)	28901	Salmonella_enterica	unaffected_pathogenicity_reduced_virulence	41.21	461	248	6	27	465	36	495	3e-118	354
HM-7_01271	A0A0L9JQ40	PHI:6892	IscU	28901	Salmonella_enterica	reduced_virulence	37.11	97	54	4	11	100	3	99	1e-15	67.4
HM-7_01272	A0A0F6B0W7	PHI:10102	STM14_RS07720_(sufS)	28901	Salmonella_enterica	reduced_virulence	50.25	396	196	1	3	397	5	400	2e-150	430
HM-7_01273	A0A0F6B0W4	PHI:6893_PHI:10099	SufB_STM14_RS07705_(sufB)	28901	Salmonella_enterica	unaffected_pathogenicity_reduced_virulence	25.88	452	299	6	2	422	31	477	2e-46	165
HM-7_01274	A0A0M2J080	PHI:6894	SufC	28901	Salmonella_enterica	unaffected_pathogenicity	53.25	246	113	1	6	249	2	247	3e-93	273
HM-7_01277	Q97T11	PHI:2732	MetQ	1313	Streptococcus_pneumoniae	unaffected_pathogenicity_reduced_virulence	37.22	266	148	9	20	271	23	283	6e-38	133
HM-7_01278	R4ZAR0	PHI:11570	MetP	1311	Streptococcus_agalactiae	reduced_virulence	47.34	169	88	1	54	222	63	230	4e-15	70.1
HM-7_01279	Q9K033	PHI:8623	Cab_(NMB0789)	487	Neisseria_meningitidis	unaffected_pathogenicity	38.25	251	143	4	1	244	1	246	2e-55	180
HM-7_01285	Q8Y4L1	PHI:6968	SpxA2	1639	Listeria_monocytogenes	unaffected_pathogenicity	56.9	116	50	0	4	119	2	117	2e-45	141
HM-7_01286	G5EHZ3	PHI:9055	MoIVD_(MGG_02540)	318829	Magnaporthe_oryzae	reduced_virulence	32.45	339	204	4	82	414	139	458	2e-53	187
HM-7_01287	Q5AJ90	PHI:3688	Fox3p	5476	Candida_albicans	unaffected_pathogenicity	41.58	392	199	7	3	375	14	394	1e-90	277
HM-7_01288	Q0P7J4	PHI:7841	ClbD	562	Escherichia_coli	unaffected_pathogenicity	25.72	311	188	11	7	306	3	281	3e-21	93.2
HM-7_01293	W9B5Y9	PHI:7541	FepC_(VK055_1930)	573	Klebsiella_pneumoniae	reduced_virulence	52.09	263	122	1	1	259	1	263	2e-100	293
HM-7_01295	Q8Y0J2	PHI:5271	FabG1	305	Ralstonia_solanacearum	lethal	28.64	199	137	4	2	197	7	203	1e-21	89.4
HM-7_01296	A0A0E0USK4	PHI:7069	HtrA	1639	Listeria_monocytogenes	reduced_virulence_unaffected_pathogenicity	52.52	337	150	6	118	450	163	493	5e-102	311
HM-7_01297	S4E4Q5	PHI:11131	WalR	1351	Enterococcus_faecalis	increased_virulence_(hypervirulence)	36.32	190	116	3	5	190	4	192	6e-35	122
HM-7_01298	A0A7G1LEG5	PHI:11520	CpxA_(BFW97_22315)	644	Aeromonas_hydrophila	reduced_virulence	28.57	294	191	8	157	439	164	449	4e-17	81.6
HM-7_01302	Q8ZPL7	PHI:10048	FumC	28901	Salmonella_enterica	reduced_virulence	62.73	432	160	1	1	431	1	432	0	573
HM-7_01308	A0A0Z9GQC2	PHI:7986	VraR	1307	Streptococcus_suis	reduced_virulence	55.98	209	88	1	2	210	4	208	3e-80	237
HM-7_01309	Q99SZ7	PHI:8947	VraS	1280	Staphylococcus_aureus	increased_virulence_(hypervirulence)	39.42	312	176	4	42	347	38	342	7e-53	176
HM-7_01315	Q8Y0J2	PHI:5271	FabG1	305	Ralstonia_solanacearum	lethal	39.18	245	148	1	3	247	5	248	9e-57	180
HM-7_01318	Q17ZY8	PHI:9139	PrdR	1496	Clostridioides_difficile	increased_virulence_(hypervirulence)	32.19	292	163	5	334	592	287	576	2e-34	136
HM-7_01321	A0A116Q7Z1	PHI:8932	AdhE	1307	Streptococcus_suis	reduced_virulence	32.48	311	172	10	36	314	492	796	2e-38	145
HM-7_01323	Q66FK0	PHI:7909	HmuV	633	Yersinia_pseudotuberculosis	unaffected_pathogenicity	40.8	250	135	2	13	256	23	265	1e-58	191
HM-7_01324	Q66FJ9	PHI:7908	HmuU	633	Yersinia_pseudotuberculosis	unaffected_pathogenicity	40.14	294	161	7	59	345	43	328	1e-49	167
HM-7_01325	Q66FJ8	PHI:7907	HmuT	633	Yersinia_pseudotuberculosis	unaffected_pathogenicity	26.41	231	156	6	62	285	27	250	1e-17	79.7
HM-7_01326	Q5GZB8	PHI:6839	PglA	347	Xanthomonas_oryzae	unaffected_pathogenicity	24.29	424	267	17	70	462	87	487	1e-13	70.9
HM-7_01329	I3U3N8	PHI:4564	CcpA	1352	Enterococcus_faecium	reduced_virulence	26.15	325	216	6	2	314	11	323	7e-32	120
HM-7_01331	Q2G2U4	PHI:7739	WalK	1280	Staphylococcus_aureus	reduced_virulence	31.03	232	152	5	350	577	369	596	1e-20	94
HM-7_01332	S4E4Q5	PHI:11131	WalR	1351	Enterococcus_faecalis	increased_virulence_(hypervirulence)	42.22	225	129	1	5	229	3	226	4e-54	172
HM-7_01333	W9B5Y9	PHI:7541	FepC_(VK055_1930)	573	Klebsiella_pneumoniae	reduced_virulence	44.05	252	141	0	4	255	8	259	8e-72	219
HM-7_01334	P15029	PHI:8009	FecD	562	Escherichia_coli	reduced_virulence	40.06	322	181	5	17	338	7	316	5e-54	178
HM-7_01335	Q66FJ9	PHI:7908	HmuU	633	Yersinia_pseudotuberculosis	unaffected_pathogenicity	33.76	314	192	4	43	348	25	330	5e-38	137
HM-7_01337	P0AAF1	PHI:9154	PotE	562	Escherichia_coli	unaffected_pathogenicity	29.93	401	240	14	1	394	1	367	2e-28	115
HM-7_01341	W8TNJ3	PHI:5354	LtaS	1280	Staphylococcus_aureus	increased_virulence_(hypervirulence)	39.67	615	359	8	10	616	13	623	2e-140	421
HM-7_01342	P45323	PHI:5422	ModA10	727	Haemophilus_influenzae	increased_virulence_(hypervirulence)	35.5	262	149	5	6	258	4	254	8e-45	149
HM-7_01344	J4VZT4	PHI:9444	Bbakr1_(XP_008600433.1)	176275	Beauveria_bassiana	unaffected_pathogenicity	46.82	267	138	1	9	271	37	303	1e-82	249
HM-7_01350	Q60048	PHI:7386	CadA	1639	Listeria_monocytogenes	unaffected_pathogenicity_reduced_virulence	34.61	731	416	15	5	699	4	708	2e-117	367
HM-7_01351	A0A0F6B5S9	PHI:10083	STM14_RS15350	28901	Salmonella_enterica	unaffected_pathogenicity	39.84	246	145	2	4	246	5	250	2e-67	207
HM-7_01352	A0A0F6B5T0	PHI:10084	STM14_RS15355	28901	Salmonella_enterica	unaffected_pathogenicity	37.02	289	177	1	1	289	1	284	9e-58	185
HM-7_01353	Q7WYI8	PHI:11571	MtsA	1311	Streptococcus_agalactiae	reduced_virulence	50.64	312	148	4	1	311	1	307	2e-111	323
HM-7_01358	Q8ZPL7	PHI:10048	FumC	28901	Salmonella_enterica	reduced_virulence	41.28	453	265	1	9	460	4	456	6e-117	350
HM-7_01361	A0A0D5YKF1	PHI:8812	CopA_(ABUW_2707)	470	Acinetobacter_baumannii	unaffected_pathogenicity_reduced_virulence	44.27	811	435	10	9	806	17	823	0	659
HM-7_01363	O07434	PHI:4070	RicR	1773	Mycobacterium_tuberculosis	reduced_virulence	46.59	88	45	1	16	101	9	96	1e-24	87.4
HM-7_01365	B4EBK3	PHI:8827	Bcal1975	95486	Burkholderia_cenocepacia	increased_virulence_(hypervirulence)	43.4	159	87	1	356	511	305	463	4e-32	127
HM-7_01371	P66860	PHI:7002	SmpB	1639	Listeria_monocytogenes	reduced_virulence	76.62	154	36	0	1	154	1	154	5e-78	227
HM-7_01372	B0XQR1	PHI:9183	SsdA_(AFUB_010850)	746128	Aspergillus_fumigatus	reduced_virulence_increased_virulence_(hypervirulence)	28.81	531	344	12	155	660	656	1177	5e-50	189
HM-7_01383	A0A086IQC3	PHI:8968	ProV	573	Klebsiella_pneumoniae	reduced_virulence	45.09	224	118	2	17	236	43	265	2e-59	196
HM-7_01391	Q53763	PHI:6324	StpC	1280	Staphylococcus_aureus	unaffected_pathogenicity	24.78	230	160	5	5	234	8	224	8e-19	80.9
HM-7_01393	A4VWH9	PHI:11234	Eno	1307	Streptococcus_suis	unaffected_pathogenicity	65.98	435	142	4	1	430	1	434	0	571
HM-7_01394	Q8ZJN0	PHI:11412	Pgm	632	Yersinia_pestis	increased_virulence_(hypervirulence)_reduced_virulence	49.02	510	255	5	2	508	4	511	2e-159	461
HM-7_01397	P0A038	PHI:6904	GAPDH	1280	Staphylococcus_aureus	reduced_virulence	52.07	338	151	5	1	332	1	333	2e-107	315
HM-7_01398	P76141	PHI:9991	LsrR	562	Escherichia_coli	reduced_virulence	25.98	254	163	8	80	320	75	316	2e-12	65.5
HM-7_01399	A0A1D8PH27	PHI:11402	Ssy1	5476	Candida_albicans	reduced_virulence	26.33	509	278	13	9	429	301	800	5e-36	140
HM-7_01400	D4I307	PHI:3126_PHI:9305	ArgD	552	Erwinia_amylovora	loss_of_pathogenicity_reduced_virulence_unaffected_pathogenicity	35.75	372	230	4	19	384	21	389	1e-73	233
HM-7_01401	Q17ZY8	PHI:9139	PrdR	1496	Clostridioides_difficile	increased_virulence_(hypervirulence)	31.58	475	281	9	18	479	140	583	2e-66	222
HM-7_01402	Q66EI1	PHI:3135	PdhR	633	Yersinia_pseudotuberculosis	reduced_virulence	30.83	240	163	2	1	238	1	239	4e-21	87.4
HM-7_01403	Q837Q1	PHI:11333	RpoN	1351	Enterococcus_faecalis	reduced_virulence	35.75	414	255	6	28	432	26	437	2e-79	251
HM-7_01406	C0RLV2	PHI:11545	B0779	29459	Brucella_melitensis	unaffected_pathogenicity	39.69	262	156	2	1	262	1	260	2e-55	177
HM-7_01407	H7C7Q3	PHI:7820	OppD_(bb0334)	139	Borreliella_burgdorferi	reduced_virulence	44.19	258	143	1	2	258	3	260	6e-65	203
HM-7_01409	A0A031WAR9	PHI:4612	App	1496	Clostridioides_difficile	increased_virulence_(hypervirulence)	38.51	322	182	3	1	311	1	317	9e-69	215
HM-7_01410	J0JQ36	PHI:11168	DppA	210	Helicobacter_pylori	increased_virulence_(hypervirulence)	27.05	499	303	14	43	508	34	504	2e-34	134
HM-7_01411	Q0P9D3	PHI:9940	PglE	197	Campylobacter_jejuni	reduced_virulence	47.89	380	165	6	6	364	2	369	7e-126	366
HM-7_01413	Q87BQ4	PHI:2937	GumD	2371	Xylella_fastidiosa	loss_of_pathogenicity	42.86	154	77	3	34	176	325	478	2e-33	122
HM-7_01416	A4VTV0	PHI:4130_PHI:6140	Cps2J	1307	Streptococcus_suis	lethal_reduced_virulence	27.71	231	156	3	1	225	1	226	6e-19	84.7
HM-7_01418	Q830A6	PHI:4127	BgsB	1351	Enterococcus_faecalis	reduced_virulence	27.97	236	137	10	91	306	88	310	7e-14	70.9
HM-7_01419	O24928	PHI:6251	HP0102	210	Helicobacter_pylori	reduced_virulence	28.29	205	138	5	5	206	3	201	4e-17	77.4
HM-7_01420	Q9X4V1	PHI:6139	Cps2G	1307	Streptococcus_suis	reduced_virulence	25	248	162	8	137	370	144	381	2e-14	72.4
HM-7_01421	Q5NEZ1	PHI:4729	WbtA	263	Francisella_tularensis	reduced_virulence	40.89	516	284	10	77	587	63	562	3e-120	367
HM-7_01422	A8YPQ5	PHI:7004	CapB2	1280	Staphylococcus_aureus	reduced_virulence	41.83	208	120	1	21	227	17	224	2e-51	165
HM-7_01423	G8DU30	PHI:5243	Cps14B	1307	Streptococcus_suis	loss_of_pathogenicity	29.69	192	127	4	30	218	36	222	4e-14	67.8
HM-7_01427	P15029	PHI:8009	FecD	562	Escherichia_coli	reduced_virulence	40.57	281	159	4	53	333	46	318	2e-47	160
HM-7_01428	W9BNM7	PHI:7483	FepD_(VK055_1928)	573	Klebsiella_pneumoniae	unaffected_pathogenicity_reduced_virulence	39.22	306	182	4	37	340	29	332	1e-28	111
HM-7_01429	Q8Y9V5	PHI:4689	PgdA	1639	Listeria_monocytogenes	reduced_virulence	44.33	194	107	1	262	455	253	445	2e-51	179
HM-7_01431	C0RLV2	PHI:11545	B0779	29459	Brucella_melitensis	unaffected_pathogenicity	37.38	206	123	2	51	250	51	256	3e-25	99
HM-7_01432	H7C7Q3	PHI:7820	OppD_(bb0334)	139	Borreliella_burgdorferi	reduced_virulence	37.6	258	154	3	4	254	7	264	2e-49	163
HM-7_01434	A0A031WAR9	PHI:4612	App	1496	Clostridioides_difficile	increased_virulence_(hypervirulence)	35.1	302	177	6	20	308	20	315	2e-58	188
HM-7_01435	J0JQ36	PHI:11168	DppA	210	Helicobacter_pylori	increased_virulence_(hypervirulence)	26.11	540	337	14	28	528	1	517	4e-31	125
HM-7_01440	P63786	PHI:3005	ClpP	1280	Staphylococcus_aureus	reduced_virulence	80.51	195	38	0	1	195	1	195	7e-116	326
HM-7_01441	M1WES1	PHI:6267_PHI:8120	Cpipt-log_Ipt-log_(cpur_04177)	5111	Claviceps_purpurea	reduced_virulence_loss_of_pathogenicity_unaffected_pathogenicity	28.35	194	120	3	2	176	288	481	3e-20	85.9
HM-7_01443	Q4WJR9	PHI:6554	SB	746128	Aspergillus_fumigatus	unaffected_pathogenicity	29.38	337	209	9	10	319	89	423	6e-18	85.9
HM-7_01448	P99143	PHI:11269	PtsH	1280	Staphylococcus_aureus	reduced_virulence	46.43	84	45	0	1	84	1	84	4e-23	82.8
HM-7_01451	Q4UX47	PHI:7824	HpaP_(XC_1307)	339	Xanthomonas_campestris	reduced_virulence	39.86	281	164	4	24	300	1	280	5e-69	214
HM-7_01453	G4MY64	PHI:6674	MoTRX2	318829	Magnaporthe_oryzae	reduced_virulence	39.23	311	176	7	21	318	6	316	7e-67	211
HM-7_01454	P0AFV4	PHI:11093	MepS	562	Escherichia_coli	reduced_virulence	36.84	114	65	4	345	456	77	185	3e-13	66.2
HM-7_01457	A3M9P1	PHI:10701	HisF_(A1S_3245)	470	Acinetobacter_baumannii	reduced_virulence_unaffected_pathogenicity	52.78	252	118	1	1	252	1	251	3e-99	288
HM-7_01458	D4HW76	PHI:9324	HisA	552	Erwinia_amylovora	unaffected_pathogenicity_reduced_virulence	35.54	242	144	5	6	239	2	239	4e-39	134
HM-7_01460	G7TE30	PHI:7790	HisB	347	Xanthomonas_oryzae	reduced_virulence	40.95	210	104	4	2	194	169	375	6e-37	130
HM-7_01461	A0A0K0GKU8	PHI:9983	HisD_(PXO_00833)	347	Xanthomonas_oryzae	reduced_virulence	44.02	418	231	2	8	423	10	426	9e-89	274
HM-7_01462	B5QZL1	PHI:5109	Prt	28901	Salmonella_enterica	reduced_virulence	31.22	221	119	6	5	208	7	211	2e-20	85.1
HM-7_01468	A0A0J9WX01	PHI:6958	GigX6	347	Xanthomonas_oryzae	increased_virulence_(hypervirulence)	34.55	110	69	2	55	161	103	212	2e-15	69.3
HM-7_01469	A0A081HZA4	PHI:10183	PtkA	1773	Mycobacterium_tuberculosis	reduced_virulence	32.97	182	117	2	9	187	17	196	3e-21	86.3
HM-7_01472	B5E5S1	PHI:4881	HPr	1313	Streptococcus_pneumoniae	lethal	45.07	304	166	1	4	306	3	306	3e-78	239
HM-7_01473	Q9C0N5	PHI:207	CaNAG2	5476	Candida_albicans	reduced_virulence	30.75	387	242	13	7	376	6	383	1e-43	155
HM-7_01474	Q9C1S8	PHI:206	CaNAG1	5476	Candida_albicans	reduced_virulence	35.04	234	144	3	16	241	12	245	1e-32	117
HM-7_01475	A4VTH4	PHI:5300	AgaR2	1307	Streptococcus_suis	reduced_virulence	35.78	232	144	4	10	237	17	247	8e-41	139
HM-7_01483	Q8DYL6	PHI:11576	UvrB	1311	Streptococcus_agalactiae	unaffected_pathogenicity	67.93	658	208	2	2	659	7	661	0	924
HM-7_01487	C9YKX4	PHI:8786	HatT_(CDR20291_1226)	1496	Clostridioides_difficile	reduced_virulence	26.59	331	226	6	14	329	28	356	7e-18	84.7
HM-7_01489	W8TTB7	PHI:10285	SrrA	1280	Staphylococcus_aureus	unaffected_pathogenicity	42.79	229	120	3	7	225	5	232	2e-59	186
HM-7_01490	A0A2J9QDB5	PHI:10227	VicK	1309	Streptococcus_mutans	unaffected_pathogenicity_increased_virulence_(hypervirulence)_reduced_virulence	39.19	222	127	2	247	460	211	432	3e-47	167
HM-7_01492	B1PWB6	PHI:6142	GlcV	1639	Listeria_monocytogenes	reduced_virulence	39.16	309	178	4	8	308	7	313	8e-76	234
HM-7_01494	N0A4X7	PHI:3114	FrxA	210	Helicobacter_pylori	reduced_virulence	46.27	201	98	4	18	212	11	207	4e-55	174
HM-7_01498	A0A0H2XGW3	PHI:7589	CtpA	1280	Staphylococcus_aureus	reduced_virulence	33.25	418	269	4	46	460	69	479	1e-72	236
HM-7_01502	A0A0H3JS81	PHI:6579	VraD	1280	Staphylococcus_aureus	reduced_virulence	32.77	235	150	5	1	228	3	236	4e-45	149
HM-7_01507	Q8Y4A8	PHI:9821	PrfA_(lmo2543)	1639	Listeria_monocytogenes	reduced_virulence	36.17	329	199	6	1	322	19	343	6e-65	207
HM-7_01508	A0A059ZR97	PHI:5240	SecA	470	Acinetobacter_baumannii	reduced_virulence	46.05	899	406	11	13	839	15	906	0	762
HM-7_01510	Q87WK5	PHI:10942	PSPTO_4541	317	Pseudomonas_syringae	unaffected_pathogenicity	30.63	382	228	9	179	554	191	541	3e-14	73.9
HM-7_01514	P24216	PHI:6733	FliD	562	Escherichia_coli	unaffected_pathogenicity	25.35	355	208	11	155	504	157	459	2e-13	70.5
HM-7_01516	Q9KUH3	PHI:5061	CsrA	666	Vibrio_cholerae	reduced_virulence	37.29	59	37	0	1	59	1	59	3e-17	67
HM-7_01520	A0A0U1YUA0	PHI:6360	FlgK	553	Pantoea_ananatis	reduced_virulence	30.85	363	203	14	8	361	5	328	5e-27	112
HM-7_01527	A0A4T9YUF5	PHI:10346	FakB2	1280	Staphylococcus_aureus	unaffected_pathogenicity	31.52	276	177	6	5	275	6	274	4e-42	144
HM-7_01528	Q6DL91	PHI:4690	DegU	1639	Listeria_monocytogenes	reduced_virulence	63.27	226	83	0	4	229	3	228	7e-105	300
HM-7_01529	Q9FD00	PHI:2473	Hrpx	66269	Pantoea_stewartii	reduced_virulence	33.81	210	128	7	176	383	283	483	5e-23	98.6
HM-7_01531	Q82Z33	PHI:2997	EF3245	1351	Enterococcus_faecalis	unaffected_pathogenicity	37.28	228	132	4	72	298	277	494	2e-33	129
HM-7_01532	V6A547	PHI:4074	WecA	615	Serratia_marcescens	reduced_virulence	28.23	294	199	5	7	294	26	313	8e-27	107
HM-7_01534	Q8PGL8	PHI:2481	RfbC	346	Xanthomonas_citri	reduced_virulence	31.17	154	102	4	6	157	86	237	1e-16	77.4
HM-7_01537	A0A097IB07	PHI:3281_PHI:4819	AS87_04050	34085	Riemerella_anatipestifer	reduced_virulence	32.4	321	201	6	2	307	4	323	1e-39	139
HM-7_01538	Q96VU5	PHI:387	UGD1	5207	Cryptococcus_neoformans	loss_of_pathogenicity	34.63	462	266	11	2	431	6	463	1e-80	255
HM-7_01541	Q87BQ4	PHI:2937	GumD	2371	Xylella_fastidiosa	loss_of_pathogenicity	43.87	155	81	3	61	209	320	474	3e-34	125
HM-7_01544	Q8ZMB9	PHI:8729	AmiC	28901	Salmonella_enterica	reduced_virulence	32.11	218	104	5	322	495	190	407	4e-23	100
HM-7_01545	P63883	PHI:10980	AmiC	562	Escherichia_coli	reduced_virulence	29.91	224	110	4	316	495	187	407	4e-25	105
HM-7_01546	B3GV24	PHI:9374	SlpA	1496	Clostridioides_difficile	loss_of_pathogenicity	30.53	226	119	8	88	275	420	645	1e-15	79
HM-7_01548	A0A133QAP1	PHI:9935	LytR	28035	Staphylococcus_lugdunensis	reduced_virulence_unaffected_pathogenicity	35.84	293	174	6	10	292	6	294	1e-60	194
HM-7_01549	Q8DTB7	PHI:7052	EpsC	1309	Streptococcus_mutans	reduced_virulence	60.81	370	143	2	1	368	1	370	2e-170	479
HM-7_01550	A0A0E0UVG9	PHI:6144	GalU	1639	Listeria_monocytogenes	reduced_virulence	66.32	285	94	2	3	286	2	285	7e-130	369
HM-7_01551	Q57EK6	PHI:7603	RfbE	235	Brucella_abortus	unaffected_pathogenicity_reduced_virulence	32.74	226	143	3	5	221	6	231	2e-39	142
HM-7_01552	R4WHP3	PHI:11410	Wzm	573	Klebsiella_pneumoniae	reduced_virulence	26.26	198	138	4	35	231	2	192	3e-13	65.9
HM-7_01556	B8F4X8	PHI:3147	RfaE	738	Glaesserella_parasuis	reduced_virulence	34.07	135	81	3	2	129	342	475	1e-13	64.7
HM-7_01559	A0A0H2XIJ3	PHI:7349	Atl	1280	Staphylococcus_aureus	unaffected_pathogenicity	42.72	213	103	6	647	849	1027	1230	5e-40	158
HM-7_01561	A0A0H2UR33	PHI:7679	SatC	1313	Streptococcus_pneumoniae	reduced_virulence	30.73	205	139	2	70	273	77	279	3e-33	120
HM-7_01562	Q2YKU8	PHI:9131	Bab2_0548	235	Brucella_abortus	unaffected_pathogenicity	38.64	308	176	4	15	322	53	347	9e-64	204
HM-7_01564	A4VXN7	PHI:6897	1910RR_(ssu05_1910)	1307	Streptococcus_suis	reduced_virulence	24.07	482	294	9	1	469	12	434	3e-25	105
HM-7_01565	Q8XZP4	PHI:10945	RSc1351_(phcK)	305	Ralstonia_solanacearum	reduced_virulence	30.04	233	137	4	251	474	161	376	1e-28	115
HM-7_01568	A0A0H6T2F5	PHI:6699	Eda	666	Vibrio_cholerae	reduced_virulence	33.15	181	118	3	7	185	1	180	3e-26	98.6
HM-7_01570	I3U3N8	PHI:4564	CcpA	1352	Enterococcus_faecium	reduced_virulence	27.03	333	221	7	4	326	8	328	7e-34	125
HM-7_01572	A0A518VKX7	PHI:10587	KduD	554	Pectobacterium_carotovorum	unaffected_pathogenicity	55.42	249	108	3	11	257	6	253	3e-97	283
HM-7_01576	Q8PGL8	PHI:2481	RfbC	346	Xanthomonas_citri	reduced_virulence	27.78	234	138	8	4	216	342	565	4e-12	66.6
HM-7_01577	Q83EH4	PHI:9510	CBU_0347	777	Coxiella_burnetii	unaffected_pathogenicity	41.53	431	251	1	10	439	22	452	6e-97	297
HM-7_01578	Q82Z33	PHI:2997	EF3245	1351	Enterococcus_faecalis	unaffected_pathogenicity	34.58	240	138	7	93	321	299	530	6e-32	123
HM-7_01580	P0AFV4	PHI:11093	MepS	562	Escherichia_coli	reduced_virulence	42.34	111	57	3	171	279	79	184	2e-24	97.8
HM-7_01582	P9WM79	PHI:4898	Rv0574c	1773	Mycobacterium_tuberculosis	reduced_virulence	25	288	172	8	55	299	4	290	3e-19	86.7
HM-7_01588	P99175	PHI:11270	CcpA	1280	Staphylococcus_aureus	reduced_virulence	33.65	318	202	4	3	313	4	319	7e-51	170
HM-7_01589	H9L428	PHI:612	Orf408	28901	Salmonella_enterica	reduced_virulence	29.9	301	197	4	3	291	98	396	3e-28	110
HM-7_01591	P77257	PHI:9992	LsrA	562	Escherichia_coli	reduced_virulence	39.24	502	273	10	7	491	16	502	1e-106	325
HM-7_01592	A0A076ZPI5	PHI:7533	VK055_1939	573	Klebsiella_pneumoniae	unaffected_pathogenicity	41.16	294	157	3	20	297	32	325	2e-51	172
HM-7_01593	Q2YJE8	PHI:9129	Bab2_1109	235	Brucella_abortus	reduced_virulence	28.24	262	178	4	42	294	37	297	1e-15	74.7
HM-7_01595	C8TZQ2	PHI:3714	OxyR	562	Escherichia_coli	reduced_virulence	28.46	246	174	1	1	246	1	244	3e-27	106
HM-7_01596	Q836A5	PHI:8543	AlsS	1351	Enterococcus_faecalis	reduced_virulence	51.46	548	265	1	8	555	1	547	0	593
HM-7_01601	Q96VU5	PHI:387	UGD1	5207	Cryptococcus_neoformans	loss_of_pathogenicity	32.57	439	265	10	2	411	8	444	1e-71	232
HM-7_01604	G2WUQ0	PHI:10379	Isw2	27337	Verticillium_dahliae	reduced_virulence	33.26	478	293	12	435	899	173	637	4e-70	251
HM-7_01605	A0A0K0GME1	PHI:8987	PXO_RS15740	347	Xanthomonas_oryzae	unaffected_pathogenicity	45.54	112	59	1	18	129	1	110	2e-31	119
HM-7_01610	A0A380UNQ5	PHI:10610	LpxA	470	Acinetobacter_baumannii	reduced_virulence	52.14	140	63	2	2	138	16	154	2e-39	135
HM-7_01621	Q9K035	PHI:8621	Cbp_(NMB0787)	487	Neisseria_meningitidis	reduced_virulence_unaffected_pathogenicity	28.87	239	140	8	4	224	49	275	2e-23	93.6
HM-7_01622	Q9K034	PHI:8622	Ctp_(NMB0788)	487	Neisseria_meningitidis	unaffected_pathogenicity	40.12	172	96	2	21	185	13	184	2e-33	118
HM-7_01623	Q9K033	PHI:8623	Cab_(NMB0789)	487	Neisseria_meningitidis	unaffected_pathogenicity	57.72	246	97	2	7	245	1	246	3e-95	278
HM-7_01624	E9EVY3	PHI:9531	MepC_(MAA_04182)	568076	Metarhizium_robertsii	unaffected_pathogenicity	40.05	422	231	7	2	401	33	454	3e-50	175
HM-7_01630	A0A086VCI7	PHI:6912	YbtP	562	Escherichia_coli	reduced_virulence	33.33	243	155	4	346	587	311	547	1e-33	134
HM-7_01638	P9WJS3	PHI:7746	Rv3109	1773	Mycobacterium_tuberculosis	reduced_virulence_unaffected_pathogenicity	38.6	329	190	7	2	325	16	337	1e-69	219
HM-7_01641	P32176	PHI:10994	FdoG	562	Escherichia_coli	unaffected_pathogenicity	23.39	513	245	15	123	517	107	589	8e-24	106
HM-7_01645	A0A2Y2A0B5	PHI:10276	MurA	1280	Staphylococcus_aureus	increased_virulence_(hypervirulence)	66.51	421	139	1	1	419	1	421	0	530
HM-7_01650	A0A0H3LK50	PHI:9184	BscN	518	Bordetella_bronchiseptica	unaffected_pathogenicity	32.3	322	206	8	69	386	81	394	1e-32	127
HM-7_01651	A8YY71	PHI:8019	AtpG	1280	Staphylococcus_aureus	reduced_virulence	51.9	289	137	2	1	288	1	288	4e-99	291
HM-7_01652	Q2FWE8	PHI:10773	AtpA	1280	Staphylococcus_aureus	reduced_virulence	78.24	501	109	0	1	501	1	501	0	816
HM-7_01656	A0A0F6B941	PHI:9436	AtpB	28901	Salmonella_enterica	reduced_virulence	30.41	217	117	8	45	244	72	271	7e-17	76.3
HM-7_01659	C5BEV2	PHI:2962	GlyA	67780	Edwardsiella_ictaluri	reduced_virulence	55.72	411	178	2	3	410	7	416	2e-162	461
HM-7_01662	Q2FWE3	PHI:11296	PtpB	1280	Staphylococcus_aureus	reduced_virulence	39.72	141	78	4	1	141	1	134	1e-22	85.9
HM-7_01663	G1BJ13	PHI:7899	YebN	347	Xanthomonas_oryzae	reduced_virulence	26.51	166	112	3	10	165	5	170	4e-11	57.8
HM-7_01664	J4KLZ9	PHI:7155	Pmr1	176275	Beauveria_bassiana	reduced_virulence	40.62	389	159	10	22	341	1949	2334	3e-74	248
HM-7_01668	Q4UWE2	PHI:3966	XC_1565	339	Xanthomonas_campestris	reduced_virulence	28.52	270	167	8	7	261	11	269	5e-21	89.4
HM-7_01669	Q8Y4A8	PHI:9821	PrfA_(lmo2543)	1639	Listeria_monocytogenes	reduced_virulence	72.8	353	96	0	1	353	1	353	0	506
HM-7_01675	T1YC56	PHI:8558	Rho	1280	Staphylococcus_aureus	increased_virulence_(hypervirulence)	66.75	400	132	1	26	424	40	439	0	559
HM-7_01676	P9WN21	PHI:6486_PHI:6487	GLPX_GPM2	1773	Mycobacterium_tuberculosis	unaffected_pathogenicity_loss_of_pathogenicity	51.44	313	151	1	2	313	30	342	4e-113	330
HM-7_01677	A0A2Y2A0B5	PHI:10276	MurA	1280	Staphylococcus_aureus	increased_virulence_(hypervirulence)	51.53	425	197	6	1	420	1	421	5e-134	390
HM-7_01679	P99075	PHI:6903	FbaA	1280	Staphylococcus_aureus	reduced_virulence	78.6	285	61	0	1	285	1	285	1e-168	466
HM-7_01680	Q9HU59	PHI:11700	NtrC	287	Pseudomonas_aeruginosa	reduced_virulence	31.58	114	78	0	2	115	4	117	2e-16	72.4
HM-7_01686	G4NFW7	PHI:8928	MoSCAD2_(MGG_08690)	318829	Magnaporthe_oryzae	loss_of_pathogenicity	40.8	375	220	2	4	377	66	439	2e-81	254
HM-7_01687	G4NFW7	PHI:8928	MoSCAD2_(MGG_08690)	318829	Magnaporthe_oryzae	loss_of_pathogenicity	39.04	374	218	3	5	369	67	439	3e-89	274
HM-7_01688	Q0P7J4	PHI:7841	ClbD	562	Escherichia_coli	unaffected_pathogenicity	39.5	281	166	2	6	283	3	282	1e-67	210
HM-7_01689	G4MVC4	PHI:5082	MoAcat1	318829	Magnaporthe_oryzae	reduced_virulence	43.56	365	200	4	6	365	43	406	1e-94	288
HM-7_01696	Q8Z4H3	PHI:9461	IroC	28901	Salmonella_enterica	reduced_virulence	29.78	544	377	4	31	571	667	1208	3e-69	241
HM-7_01697	D0C777	PHI:5092	PLD1	470	Acinetobacter_baumannii	reduced_virulence	21.77	395	224	10	158	471	66	456	1e-16	80.9
HM-7_01702	P60651	PHI:9150	SpeB	562	Escherichia_coli	reduced_virulence_unaffected_pathogenicity	34.91	275	170	4	16	285	27	297	3e-43	148
HM-7_01703	Q6RXX2	PHI:384	SPE3-LYS9	5207	Cryptococcus_neoformans	loss_of_pathogenicity	44.89	274	136	3	5	270	14	280	2e-66	218
HM-7_01704	O54286	PHI:6884	MecA	1280	Staphylococcus_aureus	unaffected_pathogenicity	26.03	315	149	13	298	563	321	600	9e-13	69.7
HM-7_01714	D0ZKI3	PHI:4694	BcsA	28901	Salmonella_enterica	increased_virulence_(hypervirulence)	33.46	547	356	7	35	577	201	743	1e-88	296
HM-7_01730	A0A077UVP4	PHI:6342	RpiRc	1280	Staphylococcus_aureus	increased_virulence_(hypervirulence)	25.78	256	168	6	1	251	3	241	2e-13	66.6
HM-7_01731	Q9KT08	PHI:9842	Pta	666	Vibrio_cholerae	unaffected_pathogenicity	47.4	308	156	5	18	322	405	709	5e-78	250
HM-7_01734	D4I076	PHI:9339	Lrp	552	Erwinia_amylovora	unaffected_pathogenicity_reduced_virulence	30.43	138	89	2	6	136	15	152	6e-14	63.9
HM-7_01735	A4ZGP3	PHI:1161	MgMfs1	1047171	Zymoseptoria_tritici	chemistry_target:_sensitivity_to_chemical_unaffected_pathogenicity	29.61	179	120	2	2	175	64	241	1e-10	61.6
HM-7_01738	B9J010	PHI:4077	EntA	1396	Bacillus_cereus	reduced_virulence	35.18	253	157	3	2	251	5	253	3e-46	153
HM-7_01740	A0A0K0GPI8	PHI:9989	AspC_(PXO_02420)	347	Xanthomonas_oryzae	reduced_virulence	26.23	385	251	14	10	371	13	387	2e-22	96.7
HM-7_01741	Q12634	PHI:685_PHI:2022	BUF_BUF1	318829	Magnaporthe_oryzae	loss_of_pathogenicity	28.41	271	164	9	2	258	26	280	9e-13	65.1
HM-7_01743	Q9A0G6	PHI:5069	GacA	1314	Streptococcus_pyogenes	lethal	36.04	283	168	7	3	276	2	280	7e-53	172
HM-7_01744	F8U971	PHI:6157	Bcdh	40559	Botrytis_cinerea	unaffected_pathogenicity	41.88	320	175	5	3	312	44	362	2e-78	244
HM-7_01745	Q9HU22	PHI:7634	RmlA	287	Pseudomonas_aeruginosa	reduced_virulence_loss_of_pathogenicity	41.87	246	138	5	2	244	4	247	5e-61	192
HM-7_01748	A0A3Q0L2L4	PHI:8517	Nab2_(VV1_0808)	672	Vibrio_vulnificus	reduced_virulence	35.09	342	195	7	18	353	6	326	2e-55	183
HM-7_01750	A6TFA0	PHI:7949	ArnB	573	Klebsiella_pneumoniae	unaffected_pathogenicity	41.11	377	216	4	6	381	2	373	2e-88	271
HM-7_01759	Q88BC5	PHI:7787	AldA_(PSPTO_0092)	317	Pseudomonas_syringae	reduced_virulence	32.39	355	221	10	83	423	143	492	2e-37	141
HM-7_01763	G2X6A8	PHI:10410	VdTHI20	27337	Verticillium_dahliae	reduced_virulence	30.3	231	128	7	62	262	62	289	5e-21	90.5
HM-7_01769	P11989	PHI:4630	PafR	562	Escherichia_coli	reduced_virulence	36	275	171	4	1	272	3	275	1e-55	179
HM-7_01771	P15926	PHI:7312	ScpA	1314	Streptococcus_pyogenes	unaffected_pathogenicity	30.06	489	256	20	179	601	121	589	4e-35	142
HM-7_01775	P9WN99	PHI:7982	RodA	1773	Mycobacterium_tuberculosis	unaffected_pathogenicity_reduced_virulence	27.15	361	212	13	34	379	105	429	8e-16	77
HM-7_01777	W8U4X9	PHI:10274	QoxD	1280	Staphylococcus_aureus	increased_virulence_(hypervirulence)	50	90	44	1	17	105	6	95	9e-24	86.3
HM-7_01779	A6QFR9	PHI:4038	QoxB	1280	Staphylococcus_aureus	reduced_virulence	63.19	652	238	2	1	651	1	651	0	805
HM-7_01780	Q8PN16	PHI:4147	XAC1258	346	Xanthomonas_citri	reduced_virulence	38.72	235	137	3	4	238	7	234	2e-49	165
HM-7_01783	Q7YZA8	PHI:2589	TcGALE	5693	Trypanosoma_cruzi	lethal	46.74	383	150	8	1	329	1	383	3e-105	311
HM-7_01784	P0A6T3	PHI:6269	GalK	562	Escherichia_coli	reduced_virulence	39.67	363	209	7	24	384	25	379	2e-83	258
HM-7_01785	A4VXN7	PHI:6897	1910RR_(ssu05_1910)	1307	Streptococcus_suis	reduced_virulence	28.97	145	99	2	136	277	289	432	2e-11	62.4
HM-7_01787	Q9ZH29	PHI:6145	GtcA	1639	Listeria_monocytogenes	reduced_virulence	43.31	127	72	0	9	135	19	145	3e-24	89.7
HM-7_01792	P32705	PHI:9229	ActP	562	Escherichia_coli	reduced_virulence_unaffected_pathogenicity	46.12	516	262	7	5	510	35	544	1e-108	332
HM-7_01798	Q7CPB9	PHI:11385	OxyR	28901	Salmonella_enterica	reduced_virulence	30.29	241	168	0	1	241	1	241	4e-36	129
HM-7_01803	Q9K033	PHI:8623	Cab_(NMB0789)	487	Neisseria_meningitidis	unaffected_pathogenicity	53.66	246	107	1	3	241	1	246	2e-89	263
HM-7_01804	Q9K034	PHI:8622	Ctp_(NMB0788)	487	Neisseria_meningitidis	unaffected_pathogenicity	37.67	215	127	3	4	212	2	215	7e-40	134
HM-7_01805	Q2YKP4	PHI:7201	Bab2_0612	235	Brucella_abortus	reduced_virulence	31.53	222	146	5	36	252	28	248	3e-32	117
HM-7_01808	W8TMV6	PHI:11282	RelP	1280	Staphylococcus_aureus	reduced_virulence_unaffected_pathogenicity	38.46	195	118	1	15	209	1	193	9e-48	154
HM-7_01809	A0A076ZPI5	PHI:7533	VK055_1939	573	Klebsiella_pneumoniae	unaffected_pathogenicity	29.45	292	177	5	42	314	42	323	1e-30	117
HM-7_01810	P77257	PHI:9992	LsrA	562	Escherichia_coli	reduced_virulence	36.63	486	281	7	4	476	10	481	2e-90	283
HM-7_01813	I1RYQ4	PHI:9360	Fgbat1/2_(FGSG_09512)	5518	Fusarium_graminearum	unaffected_pathogenicity	38.74	364	205	5	6	354	48	408	1e-88	271
HM-7_01818	O50980	PHI:6529	ChbC	139	Borreliella_burgdorferi	unaffected_pathogenicity	35.16	438	262	7	3	426	2	431	8e-78	247
HM-7_01819	Q8E1M5	PHI:8620	Cel-EIIB_(SAG0329)	1311	Streptococcus_agalactiae	reduced_virulence	39	100	61	0	1	100	2	101	1e-17	70.5
HM-7_01827	F3GTC1	PHI:7032	AlgU	317	Pseudomonas_syringae	reduced_virulence	27.81	187	117	5	1	173	2	184	5e-13	62.8
HM-7_01828	G8AA67	PHI:2476	CcpelA	27358	Colletotrichum_coccodes	reduced_virulence_increased_virulence_(hypervirulence)	42.41	224	111	7	73	290	64	275	7e-43	149
HM-7_01829	A0A0E0V727	PHI:6913	YbtQ	562	Escherichia_coli	reduced_virulence	40.43	235	138	2	338	570	344	578	2e-51	184
HM-7_01830	A0A0E0V727	PHI:6913	YbtQ	562	Escherichia_coli	reduced_virulence	35.08	248	161	0	326	573	336	583	1e-34	137
HM-7_01833	P15031	PHI:8010	FecE	562	Escherichia_coli	reduced_virulence	40.77	233	134	2	18	250	18	246	8e-58	187
HM-7_01834	P15029	PHI:8009	FecD	562	Escherichia_coli	reduced_virulence	37.82	275	170	1	59	333	43	316	2e-34	126
HM-7_01837	W9B5Y9	PHI:7541	FepC_(VK055_1930)	573	Klebsiella_pneumoniae	reduced_virulence	43.5	223	123	2	35	255	41	262	1e-64	201
HM-7_01838	Q66FJ9	PHI:7908	HmuU	633	Yersinia_pseudotuberculosis	unaffected_pathogenicity	36.21	290	167	5	43	320	44	327	1e-37	135
HM-7_01848	Q9RQP7	PHI:9884	IcaB	1280	Staphylococcus_aureus	unaffected_pathogenicity	27.34	267	158	9	46	282	21	281	1e-15	73.6
HM-7_01850	Q8E1M5	PHI:8620	Cel-EIIB_(SAG0329)	1311	Streptococcus_agalactiae	reduced_virulence	39.81	103	58	1	1	103	1	99	5e-18	71.2
HM-7_01851	A0A0H2ZQ21	PHI:6501	BglA3	1313	Streptococcus_pneumoniae	reduced_virulence	41.83	459	260	5	4	462	2	453	5e-120	357
HM-7_01853	O50980	PHI:6529	ChbC	139	Borreliella_burgdorferi	unaffected_pathogenicity	29.33	433	289	7	1	422	1	427	1e-51	178
HM-7_01860	Q8ZPL7	PHI:10048	FumC	28901	Salmonella_enterica	reduced_virulence	42.23	457	263	1	5	460	3	459	2e-118	353
HM-7_01871	A0A0F6AZV0	PHI:11065	STM14_1285_(AsiR)	28901	Salmonella_enterica	increased_virulence_(hypervirulence)	30.92	249	168	1	19	263	23	271	1e-39	138
HM-7_01874	A0A0H3Q531	PHI:6700	GntU	666	Vibrio_cholerae	reduced_virulence	34.23	409	255	6	23	420	34	439	7e-43	155
HM-7_01876	A0A0H2ZQ21	PHI:6501	BglA3	1313	Streptococcus_pneumoniae	reduced_virulence	32.36	479	281	12	8	467	4	458	1e-68	224
HM-7_01877	A8Z0F5	PHI:6308	GlcA	1280	Staphylococcus_aureus	reduced_virulence	51.75	143	65	1	460	598	523	665	1e-36	144
HM-7_01878	P11989	PHI:4630	PafR	562	Escherichia_coli	reduced_virulence	42.91	275	156	1	1	275	3	276	2e-83	250
HM-7_01883	P77257	PHI:9992	LsrA	562	Escherichia_coli	reduced_virulence	24.37	517	313	17	5	490	11	480	3e-27	113
HM-7_01887	Q5AF03	PHI:8693	GLX3	5476	Candida_albicans	loss_of_pathogenicity	32.59	224	134	6	5	211	4	227	3e-29	107
HM-7_01897	Q9X668	PHI:10289	NupC	1280	Staphylococcus_aureus	unaffected_pathogenicity	35.57	388	235	4	19	391	19	406	2e-69	223
HM-7_01899	P76141	PHI:9991	LsrR	562	Escherichia_coli	reduced_virulence	27.04	318	204	10	4	310	15	315	2e-30	115
HM-7_01909	Q9I3S1	PHI:3041	BdlA	287	Pseudomonas_aeruginosa	reduced_virulence_loss_of_pathogenicity	27.16	313	207	6	160	468	78	373	8e-21	92.8
HM-7_01910	A0A1D8PH27	PHI:11402	Ssy1	5476	Candida_albicans	reduced_virulence	22.96	466	263	13	10	383	301	762	4e-21	94.7
HM-7_01912	A0A0H3Q531	PHI:6700	GntU	666	Vibrio_cholerae	reduced_virulence	32.69	416	263	5	23	427	34	443	5e-63	209
HM-7_01913	P77432	PHI:9990	LsrK	562	Escherichia_coli	reduced_virulence	28.08	495	323	14	1	475	17	498	2e-40	151
HM-7_01914	A0A0F6AZV0	PHI:11065	STM14_1285_(AsiR)	28901	Salmonella_enterica	increased_virulence_(hypervirulence)	31.13	257	173	1	9	261	14	270	1e-41	143
HM-7_01922	Q8ZNK8	PHI:11609	YeiE	28901	Salmonella_enterica	reduced_virulence	36.86	255	151	5	6	256	8	256	1e-42	146
HM-7_01923	I3U3N8	PHI:4564	CcpA	1352	Enterococcus_faecium	reduced_virulence	23.73	295	202	7	5	288	14	296	1e-15	74.7
HM-7_01925	A0A0H2URB2	PHI:7678	SatB	1313	Streptococcus_pneumoniae	reduced_virulence	23.53	306	213	6	122	424	3	290	1e-15	75.9
HM-7_01926	A0A0H2UR33	PHI:7679	SatC	1313	Streptococcus_pneumoniae	reduced_virulence	32.16	255	166	4	28	280	30	279	4e-40	139
HM-7_01932	Q53763	PHI:6324	StpC	1280	Staphylococcus_aureus	unaffected_pathogenicity	34.87	238	141	5	3	237	2	228	3e-47	157
HM-7_01940	Q8Y6E0	PHI:9216	VirB_(lmo1747)	1639	Listeria_monocytogenes	reduced_virulence_unaffected_pathogenicity	38.3	235	142	3	1	234	1	233	3e-53	171
HM-7_01943	P11989	PHI:4630	PafR	562	Escherichia_coli	reduced_virulence	29.2	274	192	2	2	275	3	274	3e-46	155
HM-7_01944	A0A0H2ZQ21	PHI:6501	BglA3	1313	Streptococcus_pneumoniae	reduced_virulence	29.24	489	301	13	7	484	4	458	6e-62	207
HM-7_01945	A8Z0F5	PHI:6308	GlcA	1280	Staphylococcus_aureus	reduced_virulence	44.19	129	70	1	472	598	536	664	7e-28	117
HM-7_01948	Q9X399	PHI:711	AphA	666	Vibrio_cholerae	reduced_virulence	29.71	175	107	5	9	175	5	171	2e-12	61.2
HM-7_01950	A0A0Z8JEV9	PHI:11627	MutT	1307	Streptococcus_suis	reduced_virulence	38.42	203	120	4	4	206	3	200	5e-39	131
HM-7_01954	I3U3N8	PHI:4564	CcpA	1352	Enterococcus_faecium	reduced_virulence	29.97	327	223	5	3	327	6	328	7e-38	136
HM-7_01956	A0A3A5M417	PHI:10287	AroE	1280	Staphylococcus_aureus	unaffected_pathogenicity_increased_virulence_(hypervirulence)	31.79	280	171	4	17	296	4	263	3e-40	139
HM-7_01964	A0A0H2ZQ21	PHI:6501	BglA3	1313	Streptococcus_pneumoniae	reduced_virulence	29.77	487	300	14	1	475	2	458	8e-54	185
HM-7_01965	A8Z0F5	PHI:6308	GlcA	1280	Staphylococcus_aureus	reduced_virulence	47.02	151	77	1	459	606	505	655	3e-35	140
HM-7_01968	A0A0H2ZGI5	PHI:7297_PHI:7304	PhzF1_PhzF2	287	Pseudomonas_aeruginosa	reduced_virulence	32.06	262	157	8	9	269	7	248	4e-25	100
HM-7_01969	H3RI38	PHI:3092	SoxR	66269	Pantoea_stewartii	reduced_virulence	24.91	285	205	6	10	286	11	294	1e-18	82.8
HM-7_01984	P77257	PHI:9992	LsrA	562	Escherichia_coli	reduced_virulence	28.71	512	286	19	23	513	27	480	1e-37	144
HM-7_01988	Q53763	PHI:6324	StpC	1280	Staphylococcus_aureus	unaffected_pathogenicity	28.71	209	142	2	7	215	9	210	6e-25	98.2
HM-7_01990	A0A2B6C4K2	PHI:8936	HtrA	1392	Bacillus_anthracis	reduced_virulence_unaffected_pathogenicity	50.13	383	179	6	7	380	18	397	5e-113	335
HM-7_01994	Q2G2U4	PHI:7739	WalK	1280	Staphylococcus_aureus	reduced_virulence	46.09	614	310	7	7	611	7	608	0	529
HM-7_01995	S4E4Q5	PHI:11131	WalR	1351	Enterococcus_faecalis	increased_virulence_(hypervirulence)	80.26	233	46	0	3	235	2	234	4e-123	347
HM-7_02003	A0A0H2XG07	PHI:7344	PurA	1280	Staphylococcus_aureus	reduced_virulence	67.21	427	140	0	1	427	1	427	0	612
HM-7_02005	G7TIP9	PHI:4138	Xrp14	347	Xanthomonas_oryzae	reduced_virulence	30.28	360	226	9	32	376	26	375	2e-42	152
HM-7_02012	Q7WTI6	PHI:4861	IroE	562	Escherichia_coli	unaffected_pathogenicity_reduced_virulence	28.99	276	154	9	21	283	53	299	8e-22	91.7
HM-7_02019	Q04HX1	PHI:4222	Pde1	1313	Streptococcus_pneumoniae	reduced_virulence	34.26	575	360	9	79	645	78	642	1e-102	325
HM-7_02023	F3GTC1	PHI:7032	AlgU	317	Pseudomonas_syringae	reduced_virulence	28.1	153	95	3	14	151	26	178	4e-15	68.2
HM-7_02025	Q8XPQ7	PHI:10662	KatE	305	Ralstonia_solanacearum	unaffected_pathogenicity	49.9	483	227	6	16	497	27	495	1e-164	475
HM-7_02026	Q2YQ23	PHI:9134	Bab1_1070	235	Brucella_abortus	unaffected_pathogenicity	40.1	197	107	3	22	212	2	193	5e-30	108
HM-7_02027	A0A3M8WT54	PHI:10286	YpfH	1280	Staphylococcus_aureus	unaffected_pathogenicity	42.71	192	108	2	1	192	1	190	5e-46	149
HM-7_02030	A0A086IQC3	PHI:8968	ProV	573	Klebsiella_pneumoniae	reduced_virulence	46.77	248	121	5	17	259	43	284	6e-68	216
HM-7_02041	O05853	PHI:3628	Rv3213c	1773	Mycobacterium_tuberculosis	increased_virulence_(hypervirulence)	40.08	247	146	2	16	262	5	249	1e-53	173
HM-7_02045	A4VYE0	PHI:11091	GidA	1307	Streptococcus_suis	reduced_virulence	64.57	604	210	3	28	628	29	631	0	798
HM-7_02046	A4VWD1	PHI:9270_PHI:11090	MnmE	1307	Streptococcus_suis	reduced_virulence	61.26	462	166	6	1	459	6	457	0	566
HM-7_02049	Q9A1J4	PHI:4503	FasX	1314	Streptococcus_pyogenes	reduced_virulence	50	106	51	2	1	106	1	104	4e-32	108
HM-7_02056	Q75WC5	PHI:824_PHI:6838	GyrA	337	Burkholderia_glumae	chemistry_target:_sensitivity_to_chemical_chemistry_target:_resistance_to_chemical_reduced_virulence_loss_of_pathogenicity	65.87	167	57	0	3	169	2	168	1e-74	238
HM-7_02057	Q75WC5	PHI:824_PHI:6838	GyrA	337	Burkholderia_glumae	chemistry_target:_sensitivity_to_chemical_chemistry_target:_resistance_to_chemical_reduced_virulence_loss_of_pathogenicity	46.15	663	309	6	1	618	178	837	0	578
HM-7_02064	D5AF41	PHI:4071	IMPDH	1307	Streptococcus_suis	reduced_virulence	68.51	489	151	1	2	487	4	492	0	706
HM-7_02066	A5CVB7	PHI:3028	Vatr2	28447	Clavibacter_michiganensis	reduced_virulence	32.7	370	242	3	116	480	45	412	9e-60	201
HM-7_02067	B3GXB6	PHI:7075	PdxS	715	Actinobacillus_pleuropneumoniae	reduced_virulence	82.41	290	51	0	5	294	6	295	7e-167	463
HM-7_02068	B3GXB7	PHI:7076	PdxT	715	Actinobacillus_pleuropneumoniae	reduced_virulence	52.69	186	85	1	3	188	8	190	2e-69	208
HM-7_02070	Q87UE7	PHI:10943	PSPTO_5352	317	Pseudomonas_syringae	unaffected_pathogenicity	38.85	157	84	4	119	267	280	432	8e-19	84
HM-7_02089	Q81Z68	PHI:3446	YceH	1392	Bacillus_anthracis	reduced_virulence	24.55	277	185	8	76	339	82	347	9e-14	70.1
HM-7_02090	Q8XWV5	PHI:7723	SpeC_(RSc2365)	305	Ralstonia_solanacearum	loss_of_pathogenicity	27.86	323	195	8	4	292	153	471	5e-26	110
HM-7_02099	A0A0H3JLK2	PHI:4960	RsmI	1280	Staphylococcus_aureus	reduced_virulence	46.43	280	143	3	14	290	1	276	9e-76	231
HM-7_02102	G4Z2B4	PHI:3071	PsTatD4	67593	Phytophthora_sojae	reduced_virulence	31.76	170	108	4	2	164	58	226	1e-18	81.3
HM-7_02105	A0A0P9KK16	PHI:11008	RsmA	47877	Pseudomonas_amygdali	unaffected_pathogenicity_reduced_virulence	34.8	273	163	3	16	287	3	261	9e-48	159
HM-7_02110	W8U6D4	PHI:9260_PHI:10278_PHI:10552	PurR	1280	Staphylococcus_aureus	increased_virulence_(hypervirulence)_reduced_virulence	54.85	268	121	0	1	268	1	268	3e-111	320
HM-7_02112	Q724L7	PHI:6189	SpoVG	1639	Listeria_monocytogenes	increased_virulence_(hypervirulence)	82.72	81	14	0	1	81	1	81	8e-47	144
HM-7_02113	B2I2B5	PHI:8042	LpxA	470	Acinetobacter_baumannii	reduced_virulence	43.82	445	244	5	7	449	6	446	1e-125	371
HM-7_02114	Q5NH02	PHI:4732	FTT0673p/prsAp	263	Francisella_tularensis	unaffected_pathogenicity	50.48	313	149	5	9	316	4	315	9e-94	280
HM-7_02118	Q81J94	PHI:6483	Mfd	1396	Bacillus_cereus	loss_of_pathogenicity	68.5	1165	367	0	10	1174	10	1174	0	1621
HM-7_02126	Q8ZLT3	PHI:3878	Pnp	28901	Salmonella_enterica	reduced_virulence	50	76	38	0	3	78	619	694	1e-18	79.3
HM-7_02131	T4N9Q8	PHI:10256	PrkC	1496	Clostridioides_difficile	unaffected_pathogenicity	33.77	154	84	6	21	164	10	155	8e-12	64.3
HM-7_02133	Q87BR6	PHI:2936	XhpT	2371	Xylella_fastidiosa	reduced_virulence	28.24	170	117	3	8	173	16	184	2e-21	84.7
HM-7_02134	Q6NF92	PHI:11203	FtsH	1717	Corynebacterium_diphtheriae	unaffected_pathogenicity	56.67	457	197	1	146	602	155	610	6e-157	470
HM-7_02137	Q71XE6	PHI:6137_PHI:7070	PrsA2	1639	Listeria_monocytogenes	reduced_virulence_unaffected_pathogenicity	25.98	281	185	9	17	292	1	263	7e-14	68.9
HM-7_02138	Q4X256	PHI:6556	MecA	746128	Aspergillus_fumigatus	unaffected_pathogenicity_reduced_virulence	42.01	269	138	5	6	259	15	280	1e-47	166
HM-7_02139	Q4WLR6	PHI:7653	TrpA	746128	Aspergillus_fumigatus	reduced_virulence	37.56	434	240	6	41	454	74	496	8e-86	271
HM-7_02140	Q4UZG1	PHI:3941	XC_0481	339	Xanthomonas_campestris	reduced_virulence	57.07	191	77	1	1	186	1	191	3e-79	233
HM-7_02147	V6RRH2	PHI:1594	GzOB034	5518	Fusarium_graminearum	unaffected_pathogenicity	42.88	513	265	11	12	498	73	583	3e-136	405
HM-7_02166	V5VGK1	PHI:11207	ClpB	470	Acinetobacter_baumannii	reduced_virulence	47.7	868	373	12	1	803	1	852	0	702
HM-7_02171	Q8PLR7	PHI:4145	XAC1722	346	Xanthomonas_citri	reduced_virulence	52.56	156	74	0	2	157	5	160	6e-58	176
HM-7_02173	I1S053	PHI:1772	GzZC087	5518	Fusarium_graminearum	reduced_virulence	39.6	101	55	1	138	232	541	641	4e-13	67.4
HM-7_02184	P9WHE3	PHI:7583	Rv0652_(rplL)	1773	Mycobacterium_tuberculosis	increased_virulence_(hypervirulence)	59.06	127	44	2	3	121	4	130	1e-17	71.6
HM-7_02186	A3M1G3	PHI:7860	RpoB	470	Acinetobacter_baumannii	reduced_virulence	47.38	975	389	21	10	896	8	946	0	826
HM-7_02189	I1RZ39	PHI:1599	GzOB039	5518	Fusarium_graminearum	unaffected_pathogenicity	55.4	139	46	3	3	138	54	179	3e-44	141
HM-7_02191	A0A380PIP1	PHI:11030	BipA	632	Yersinia_pestis	reduced_virulence	37.89	190	106	4	7	187	2	188	2e-29	122
HM-7_02192	W8TRT9	PHI:10282	TufA	1280	Staphylococcus_aureus	increased_virulence_(hypervirulence)_unaffected_pathogenicity	86.11	396	53	2	1	396	1	394	0	630
HM-7_02198	I1RCH5	PHI:1569	GzOB009	5518	Fusarium_graminearum	lethal	44.05	311	135	9	3	276	55	363	3e-61	196
HM-7_02205	Q7VTC1	PHI:11120	RplN	520	Bordetella_pertussis	unaffected_pathogenicity_increased_virulence_(hypervirulence)	62.3	122	46	0	1	122	1	122	5e-39	125
HM-7_02215	Q8Y448	PHI:5257	SecY	1639	Listeria_monocytogenes	increased_virulence_(hypervirulence)	63.34	431	157	1	1	430	1	431	3e-177	500
HM-7_02217	D2TI55	PHI:9334	Map	67825	Citrobacter_rodentium	effector_(plant_avirulence_determinant)	47.54	244	126	2	5	246	6	249	7e-77	231
HM-7_02224	A0A086IQC3	PHI:8968	ProV	573	Klebsiella_pneumoniae	reduced_virulence	38.1	210	118	5	28	229	48	253	2e-35	129
HM-7_02225	A0A086IQC3	PHI:8968	ProV	573	Klebsiella_pneumoniae	reduced_virulence	34.09	220	135	3	21	236	42	255	1e-29	114
HM-7_02240	Q8Y9V5	PHI:4689	PgdA	1639	Listeria_monocytogenes	reduced_virulence	28.04	189	128	5	55	242	264	445	4e-17	78.6
HM-7_02249	Q4USG7	PHI:3282	NagZ	339	Xanthomonas_campestris	reduced_virulence	29.86	288	179	5	68	348	9	280	2e-29	117
HM-7_02250	Q4UWM4	PHI:3965	XC_1481	339	Xanthomonas_campestris	reduced_virulence	28.42	373	182	18	75	415	46	365	1e-24	103
HM-7_02252	A0A0F6AZV0	PHI:11065	STM14_1285_(AsiR)	28901	Salmonella_enterica	increased_virulence_(hypervirulence)	27.44	277	195	3	6	277	14	289	2e-30	114
HM-7_02253	Q2FK71	PHI:7350	MurQ	1280	Staphylococcus_aureus	unaffected_pathogenicity	50	264	132	0	10	273	6	269	1e-90	270
HM-7_02259	A0A0K0GQW7	PHI:10178	RocF_(PXO_RS22625)	347	Xanthomonas_oryzae	reduced_virulence	42.57	303	162	4	7	303	8	304	2e-77	236
HM-7_02260	A0A1H1XDV4	PHI:10736	AlgU	317	Pseudomonas_syringae	reduced_virulence_unaffected_pathogenicity	36.56	186	104	3	9	187	11	189	2e-32	113
HM-7_02262	Q04JI6	PHI:4221	DacA	1313	Streptococcus_pneumoniae	lethal	51.48	237	111	2	14	249	11	244	3e-83	249
HM-7_02264	Q06951	PHI:703	RfbB	666	Vibrio_cholerae	reduced_virulence	26.92	483	280	18	5	443	7	460	6e-32	125
HM-7_02265	D4I4L2	PHI:9308	GlmS	552	Erwinia_amylovora	reduced_virulence	41.06	621	333	14	1	600	1	609	1e-127	386
HM-7_02268	Q53763	PHI:6324	StpC	1280	Staphylococcus_aureus	unaffected_pathogenicity	34.08	223	134	5	1	222	1	211	2e-34	124
HM-7_02270	A0A0H3JS81	PHI:6579	VraD	1280	Staphylococcus_aureus	reduced_virulence	42.27	220	124	2	1	219	3	220	1e-52	169
HM-7_02277	Q53763	PHI:6324	StpC	1280	Staphylococcus_aureus	unaffected_pathogenicity	33.79	219	136	3	1	219	1	210	8e-34	122
HM-7_02289	W8UWD7	PHI:10290	YhcF	1280	Staphylococcus_aureus	unaffected_pathogenicity_increased_virulence_(hypervirulence)	51.22	123	60	0	1	123	1	123	4e-40	129
HM-7_02290	Q7MVN8	PHI:9164	PG_RS04465_(PG1010)	837	Porphyromonas_gingivalis	reduced_virulence	30.43	207	134	3	20	222	19	219	2e-25	100
HM-7_02295	Q57RZ3	PHI:5370	RamA	28901	Salmonella_enterica	reduced_virulence	39.22	102	62	0	4	105	5	106	1e-21	86.7
HM-7_02299	A0A1D8PH27	PHI:11402	Ssy1	5476	Candida_albicans	reduced_virulence	31.37	153	94	4	6	149	301	451	1e-12	68.6
HM-7_02301	P12681	PHI:11265	PgtP	28901	Salmonella_enterica	reduced_virulence	34.15	451	283	7	1	443	1	445	2e-83	262
HM-7_02304	I1RSU2	PHI:724_PHI:730	PKS9_KSA1	5518	Fusarium_graminearum	unaffected_pathogenicity	40.98	427	234	7	1	409	1	427	5e-92	282
HM-7_02315	Q87Y52	PHI:7451	PSPTO_3957	317	Pseudomonas_syringae	reduced_virulence	43.48	69	39	0	8	76	15	83	2e-15	66.6
HM-7_02317	Q87Y52	PHI:7451	PSPTO_3957	317	Pseudomonas_syringae	reduced_virulence	38.89	72	44	0	4	75	12	83	2e-18	70.9
HM-7_02324	Q5XEA3	PHI:3487	AdcR	1314	Streptococcus_pyogenes	reduced_virulence	29.46	112	77	1	41	152	36	145	6e-13	60.8
HM-7_02328	J4VZT4	PHI:9444	Bbakr1_(XP_008600433.1)	176275	Beauveria_bassiana	unaffected_pathogenicity	44.74	266	141	2	8	267	37	302	8e-81	244
HM-7_02330	P67331	PHI:3154	Spr0084	1313	Streptococcus_pneumoniae	reduced_virulence	61.32	318	118	1	1	313	1	318	5e-148	417
HM-7_02331	A0A0H2XHD4	PHI:6628	BcaP	1280	Staphylococcus_aureus	unaffected_pathogenicity_reduced_virulence	24.29	420	270	11	3	398	23	418	4e-13	69.7
HM-7_02332	P11989	PHI:4630	PafR	562	Escherichia_coli	reduced_virulence	37.82	275	170	1	1	275	3	276	2e-78	237
HM-7_02333	A8Z0F5	PHI:6308	GlcA	1280	Staphylococcus_aureus	reduced_virulence	51.24	121	59	0	474	594	535	655	2e-24	106
HM-7_02334	A0A0H2ZQ21	PHI:6501	BglA3	1313	Streptococcus_pneumoniae	reduced_virulence	34.26	470	284	10	9	468	4	458	1e-78	251
HM-7_02341	O51369	PHI:6524	FruA1	139	Borreliella_burgdorferi	unaffected_pathogenicity	43.75	96	53	1	2	97	165	259	8e-20	81.3
HM-7_02342	Q665I9	PHI:3133	PtsN	633	Yersinia_pseudotuberculosis	reduced_virulence	34.53	139	84	5	9	144	20	154	2e-15	67.8
HM-7_02343	D4ALV9	PHI:6569	SUB6	523103	Trichophyton_mentagrophytes	reduced_virulence	29.88	328	190	9	387	694	101	408	2e-27	114
HM-7_02346	A0A1D8PH27	PHI:11402	Ssy1	5476	Candida_albicans	reduced_virulence	25.15	493	287	12	12	425	302	791	1e-27	115
HM-7_02357	A0A1C3YLW9	PHI:5892	FGSG_09382	5518	Fusarium_graminearum	unaffected_pathogenicity	32.19	320	180	11	69	370	128	428	9e-31	123
HM-7_02358	P06618	PHI:4171	IaaH-1	29438	Pseudomonas_savastanoi	reduced_virulence	28.47	432	240	16	66	480	62	441	4e-14	72.8
HM-7_02362	Q8ZPS2	PHI:9092	YdiD	28901	Salmonella_enterica	reduced_virulence	32.41	503	315	13	17	500	40	536	1e-67	225
HM-7_02363	A0A0H2XHD4	PHI:6628	BcaP	1280	Staphylococcus_aureus	unaffected_pathogenicity_reduced_virulence	35.6	455	277	6	16	455	18	471	5e-64	213
HM-7_02366	A0A378CFB4	PHI:11408	YaaA	573	Klebsiella_pneumoniae	reduced_virulence	37.13	272	156	7	214	472	1	270	9e-41	152
HM-7_02368	Q9HV74	PHI:3440	CbrA	287	Pseudomonas_aeruginosa	reduced_virulence_unaffected_pathogenicity	27	263	159	10	228	466	721	974	3e-12	67.4
HM-7_02372	Q4V006	PHI:3947	XC_0281	339	Xanthomonas_campestris	reduced_virulence	34.27	321	179	9	5	306	6	313	1e-40	142
HM-7_02374	A0A0K0GH16	PHI:9015	PXO_RS03980	347	Xanthomonas_oryzae	unaffected_pathogenicity	22.34	197	145	2	2	191	6	201	4e-14	67.8
HM-7_02375	Q53763	PHI:6324	StpC	1280	Staphylococcus_aureus	unaffected_pathogenicity	31.39	223	139	4	21	243	19	227	8e-32	115
HM-7_02382	Q8Y0J2	PHI:5271	FabG1	305	Ralstonia_solanacearum	lethal	34.4	250	160	4	1	250	1	246	4e-36	127
HM-7_02383	Q8P801	PHI:6662	GumF	339	Xanthomonas_campestris	reduced_virulence	27.03	344	237	9	2	336	26	364	6e-19	85.1
HM-7_02393	Q81Z69	PHI:3445	YceG	1392	Bacillus_anthracis	reduced_virulence	42.22	514	294	3	26	537	25	537	3e-152	445
HM-7_02394	Q81Z68	PHI:3446	YceH	1392	Bacillus_anthracis	reduced_virulence	59.6	354	142	1	7	359	3	356	7e-153	433
HM-7_02395	A0A086IQC3	PHI:8968	ProV	573	Klebsiella_pneumoniae	reduced_virulence	49.87	379	186	1	19	393	14	392	5e-126	369
HM-7_02401	Q4R0Z0	PHI:3140	ArcD	1307	Streptococcus_suis	reduced_virulence	24.22	479	321	6	10	449	3	478	2e-34	133
HM-7_02402	Q839C1	PHI:4139	Ldh-1	1351	Enterococcus_faecalis	unaffected_pathogenicity_reduced_virulence	57.19	313	133	1	3	315	7	318	8e-130	371
HM-7_02404	I3U3N8	PHI:4564	CcpA	1352	Enterococcus_faecium	reduced_virulence	30.3	330	225	4	2	329	12	338	8e-41	144
HM-7_02405	A6TFA0	PHI:7949	ArnB	573	Klebsiella_pneumoniae	unaffected_pathogenicity	32.26	372	223	8	84	435	14	376	6e-62	204
HM-7_02421	Q0V515	PHI:3914	Sdh1	13684	Parastagonospora_nodorum	reduced_virulence	34.63	488	295	10	2	477	12	487	3e-67	222
HM-7_02422	A0A0U1GNF3	PHI:7062	AroD	28901	Salmonella_enterica	unaffected_pathogenicity	36.29	237	149	2	15	250	14	249	3e-46	153
HM-7_02423	G4MMK2	PHI:3975	MoIlv2	318829	Magnaporthe_oryzae	loss_of_pathogenicity	30.42	572	362	13	11	563	90	644	3e-69	235
HM-7_02426	A0Q881	PHI:3916	AnsP	263	Francisella_tularensis	reduced_virulence	25.54	415	268	14	18	422	33	416	3e-12	66.2
HM-7_02428	U6ZHA8	PHI:4175	KdgR	1089444	Dickeya_solani	unaffected_pathogenicity	30.95	252	166	3	7	251	8	258	2e-22	91.3
HM-7_02431	C8TZQ2	PHI:3714	OxyR	562	Escherichia_coli	reduced_virulence	31.82	308	185	8	1	297	1	294	1e-31	118
HM-7_02433	A0A0H2ZR57	PHI:7007	Axe	1313	Streptococcus_pneumoniae	unaffected_pathogenicity_reduced_virulence	34.73	311	188	10	8	309	7	311	4e-37	133
HM-7_02436	Q2FFX4	PHI:2635	PutA	1280	Staphylococcus_aureus	unaffected_pathogenicity	40.85	284	164	3	19	300	18	299	3e-77	237
HM-7_02437	Q9I5F6	PHI:7999	PutA	287	Pseudomonas_aeruginosa	reduced_virulence	35.15	478	297	10	40	512	572	1041	2e-68	236
HM-7_02440	Q9K034	PHI:8622	Ctp_(NMB0788)	487	Neisseria_meningitidis	unaffected_pathogenicity	41.28	218	121	2	14	225	2	218	5e-52	166
HM-7_02441	Q9K035	PHI:8621	Cbp_(NMB0787)	487	Neisseria_meningitidis	reduced_virulence_unaffected_pathogenicity	35.77	246	142	8	31	271	35	269	5e-23	94
HM-7_02447	Q0P864	PHI:4052	Cj1564	197	Campylobacter_jejuni	unaffected_pathogenicity	38.95	172	97	2	315	485	467	631	2e-11	65.1
HM-7_02449	I1RLT3	PHI:7718	FgOXP2	5518	Fusarium_graminearum	reduced_virulence	27.31	725	445	23	1	665	1	703	9e-56	204
HM-7_02450	I1S0H5	PHI:7717	FgOXP1	5518	Fusarium_graminearum	reduced_virulence	27.68	513	320	18	4	489	776	1264	9e-37	146
HM-7_02451	B8F6H2	PHI:11189	PotD	738	Glaesserella_parasuis	reduced_virulence	26.88	279	195	6	40	315	30	302	5e-24	99.8
HM-7_02452	Q8DPC2	PHI:6319	PotA	1313	Streptococcus_pneumoniae	reduced_virulence	41.74	357	182	8	4	354	6	342	3e-77	241
HM-7_02453	A0A0B7LYL4	PHI:6320	PotB	1313	Streptococcus_pneumoniae	reduced_virulence	28.75	240	158	4	31	268	26	254	8e-21	87.8
HM-7_02454	A0A0H2UR33	PHI:7679	SatC	1313	Streptococcus_pneumoniae	reduced_virulence	27.21	136	96	2	89	223	95	228	3e-11	60.5
HM-7_02455	A0A024CHY2	PHI:2935	CifB	36746	Pseudomonas_cichorii	reduced_virulence	33.45	3229	1960	64	7	3111	1051	4214	0	1531
HM-7_02456	A0A024CHY2	PHI:2935	CifB	36746	Pseudomonas_cichorii	reduced_virulence	35.11	3204	1873	65	5	3087	2130	5248	0	1630
HM-7_02457	V9W6M6	PHI:3090	PamA	1464	Paenibacillus_larvae	reduced_virulence	33.62	1056	670	17	1	1044	1	1037	0	620
HM-7_02458	Q9I157	PHI:6991	PvdL	287	Pseudomonas_aeruginosa	loss_of_pathogenicity	35.13	2112	1267	37	1235	3282	1635	3707	0	1232
HM-7_02459	W2E906	PHI:3274	DhbF	1464	Paenibacillus_larvae	unaffected_pathogenicity	33.41	1338	807	29	1289	2576	933	2236	0	694
HM-7_02460	Q9I156	PHI:6990	PvdG	287	Pseudomonas_aeruginosa	loss_of_pathogenicity	24.03	233	168	6	15	239	7	238	7e-18	78.6
HM-7_02463	Q53763	PHI:6324	StpC	1280	Staphylococcus_aureus	unaffected_pathogenicity	28.26	230	156	3	1	228	3	225	2e-29	108
HM-7_02467	E9NQ06	PHI:8043	GntR	1307	Streptococcus_suis	increased_virulence_(hypervirulence)	39.18	365	202	6	1	358	1	352	2e-82	258
HM-7_02468	Q0P7J0	PHI:6505	ClbA	562	Escherichia_coli	reduced_virulence	28.75	160	106	4	26	177	24	183	3e-16	73.9
HM-7_02471	Q8XNW0	PHI:6725	Srt	1502	Clostridium_perfringens	unaffected_pathogenicity	26.32	133	89	2	58	186	59	186	2e-12	61.2
HM-7_02473	Q9K033	PHI:8623	Cab_(NMB0789)	487	Neisseria_meningitidis	unaffected_pathogenicity	68.29	246	75	1	1	243	1	246	1e-115	330
HM-7_02474	Q9K034	PHI:8622	Ctp_(NMB0788)	487	Neisseria_meningitidis	unaffected_pathogenicity	53.39	221	97	2	15	230	1	220	2e-71	216
HM-7_02475	Q9K035	PHI:8621	Cbp_(NMB0787)	487	Neisseria_meningitidis	reduced_virulence_unaffected_pathogenicity	49.27	274	130	6	4	270	2	273	8e-78	235
HM-7_02476	A0A1D8PH27	PHI:11402	Ssy1	5476	Candida_albicans	reduced_virulence	25.25	503	294	10	8	429	298	799	1e-36	142
HM-7_02481	Q9K035	PHI:8621	Cbp_(NMB0787)	487	Neisseria_meningitidis	reduced_virulence_unaffected_pathogenicity	34.05	232	139	6	35	260	51	274	2e-29	110
HM-7_02482	Q9K034	PHI:8622	Ctp_(NMB0788)	487	Neisseria_meningitidis	unaffected_pathogenicity	37.44	211	114	4	22	220	16	220	4e-37	127
HM-7_02483	Q9K033	PHI:8623	Cab_(NMB0789)	487	Neisseria_meningitidis	unaffected_pathogenicity	52.65	245	112	1	1	241	1	245	1e-89	263
HM-7_02487	W8TTB7	PHI:10285	SrrA	1280	Staphylococcus_aureus	unaffected_pathogenicity	41.56	231	130	3	2	229	4	232	3e-65	200
HM-7_02488	Q5HFT1	PHI:10535	SrrB	1280	Staphylococcus_aureus	increased_virulence_(hypervirulence)_reduced_virulence	37.23	231	138	6	246	472	356	583	2e-39	148
HM-7_02490	W7MS01	PHI:3389	FVEG_12521	117187	Fusarium_verticillioides	unaffected_pathogenicity	24.06	503	320	16	3	450	11	506	1e-19	89.7
HM-7_02491	C9YKX4	PHI:8786	HatT_(CDR20291_1226)	1496	Clostridioides_difficile	reduced_virulence	29.29	396	246	8	1	372	5	390	3e-33	132
HM-7_02497	E9NQ06	PHI:8043	GntR	1307	Streptococcus_suis	increased_virulence_(hypervirulence)	24.66	365	237	11	15	372	7	340	4e-22	96.7
HM-7_02498	D4I307	PHI:3126_PHI:9305	ArgD	552	Erwinia_amylovora	loss_of_pathogenicity_reduced_virulence_unaffected_pathogenicity	32.08	399	230	8	38	430	30	393	1e-59	198
HM-7_02500	Q0V515	PHI:3914	Sdh1	13684	Parastagonospora_nodorum	reduced_virulence	47.06	459	233	3	5	461	33	483	2e-136	400
HM-7_02506	Q0U6E8	PHI:2249_PHI:2270	Mpd1	13684	Parastagonospora_nodorum	unaffected_pathogenicity	36.53	375	230	4	2	368	6	380	4e-85	262
HM-7_02507	Q87WK5	PHI:10942	PSPTO_4541	317	Pseudomonas_syringae	unaffected_pathogenicity	32.26	248	134	4	238	475	225	448	2e-22	99.4
HM-7_02509	Q884I7	PHI:588	PSPTO2105	317	Pseudomonas_syringae	reduced_virulence	26.34	262	175	8	46	295	64	319	2e-13	68.2
HM-7_02521	I1S2C4	PHI:5068	MCC	5518	Fusarium_graminearum	reduced_virulence	34.06	320	185	7	2	309	1090	1395	1e-40	150
HM-7_02522	U6ZHA8	PHI:4175	KdgR	1089444	Dickeya_solani	unaffected_pathogenicity	23.79	248	188	1	3	249	11	258	2e-19	83.2
HM-7_02528	Q8Y0J2	PHI:5271	FabG1	305	Ralstonia_solanacearum	lethal	34.14	249	155	5	43	287	5	248	5e-38	133
HM-7_02533	C6DI28	PHI:10580	PccS1_003516	554	Pectobacterium_carotovorum	unaffected_pathogenicity	26.27	217	147	3	7	217	11	220	1e-20	85.9
HM-7_02536	B5F7U8	PHI:8862	LeuB	28901	Salmonella_enterica	reduced_virulence	37.22	360	208	10	2	348	3	357	2e-61	199
HM-7_02541	Q9RQP9	PHI:9883	IcaA	1280	Staphylococcus_aureus	unaffected_pathogenicity	27.2	375	263	5	47	418	45	412	1e-36	137
HM-7_02544	Q54970	PHI:3604	SpxB	1313	Streptococcus_pneumoniae	increased_virulence_(hypervirulence)	33.51	564	365	5	5	559	7	569	2e-96	304
HM-7_02550	A0A2R6UD96	PHI:8587	MntH2	1351	Enterococcus_faecalis	unaffected_pathogenicity_reduced_virulence	40.87	416	225	9	27	423	34	447	2e-69	225
HM-7_02554	A0A2J9QDB5	PHI:10227	VicK	1309	Streptococcus_mutans	unaffected_pathogenicity_increased_virulence_(hypervirulence)_reduced_virulence	23.76	383	206	13	205	531	80	432	6e-16	78.6
HM-7_02555	A0A0K0GH16	PHI:9015	PXO_RS03980	347	Xanthomonas_oryzae	unaffected_pathogenicity	32.79	122	80	2	2	123	4	123	3e-17	76.3
HM-7_02559	Q53763	PHI:6324	StpC	1280	Staphylococcus_aureus	unaffected_pathogenicity	42.13	216	109	6	5	217	3	205	4e-53	172
HM-7_02565	Q9HVZ7	PHI:7632	MurF	287	Pseudomonas_aeruginosa	unaffected_pathogenicity_loss_of_pathogenicity	35.68	454	259	13	17	454	14	450	6e-59	198
HM-7_02568	Q8Y8N0	PHI:6510_PHI:7620	CshA_Lmo0866	1639	Listeria_monocytogenes	unaffected_pathogenicity_increased_virulence_(hypervirulence)	69.04	436	135	0	5	440	4	439	0	615
HM-7_02574	A0KL98	PHI:11459	Alr-2	644	Aeromonas_hydrophila	reduced_virulence	32.35	371	225	12	12	374	6	358	1e-52	178
HM-7_02576	A6QIR4	PHI:9882	MazF	1280	Staphylococcus_aureus	increased_virulence_(hypervirulence)_unaffected_pathogenicity	66.96	112	37	0	2	113	1	112	1e-44	139
HM-7_02583	P95844	PHI:9446	SigB	1280	Staphylococcus_aureus	reduced_virulence_unaffected_pathogenicity	56.52	253	109	1	1	252	1	253	6e-95	278
HM-7_02587	S8ENF7	PHI:11455	Pdh-e1alpha	5811	Toxoplasma_gondii	unaffected_pathogenicity	38.02	313	183	2	13	315	261	572	6e-56	190
HM-7_02588	A5IXN3	PHI:4610	PdhB	2110	Mycoplasmopsis_agalactiae	reduced_virulence	37.17	339	195	5	4	337	3	328	2e-65	208
HM-7_02589	Q2FH26	PHI:7353	OdhB	1280	Staphylococcus_aureus	unaffected_pathogenicity	29.86	422	243	6	4	376	3	420	2e-51	176
HM-7_02590	Q5ZVD8	PHI:6520	LpdA	446	Legionella_pneumophila	effector_(plant_avirulence_determinant)	36.22	450	280	6	3	448	14	460	2e-88	276
HM-7_02591	Q5GZM8	PHI:3219	FleQ	347	Xanthomonas_oryzae	unaffected_pathogenicity	38.42	354	178	4	301	615	134	486	8e-73	241
HM-7_02600	P0A355	PHI:7637	CspA	1639	Listeria_monocytogenes	reduced_virulence	90.91	66	6	0	1	66	1	66	4e-39	121
HM-7_02601	A8Z0F5	PHI:6308	GlcA	1280	Staphylococcus_aureus	reduced_virulence	45.99	137	72	1	450	586	523	657	2e-30	124
HM-7_02603	P11989	PHI:4630	PafR	562	Escherichia_coli	reduced_virulence	36.23	276	169	5	1	273	3	274	3e-70	216
HM-7_02604	A5IYL7	PHI:6517	AdhT	2110	Mycoplasmopsis_agalactiae	reduced_virulence	34.65	329	194	6	32	348	25	344	8e-57	186
HM-7_02608	C9YKX4	PHI:8786	HatT_(CDR20291_1226)	1496	Clostridioides_difficile	reduced_virulence	25.32	308	220	4	45	343	52	358	1e-17	84.3
HM-7_02611	A0A076ZHT9	PHI:7511	VK055_1961	573	Klebsiella_pneumoniae	unaffected_pathogenicity	32.3	161	100	5	6	161	3	159	2e-14	69.3
HM-7_02653	A0A165G9C3	PHI:6870	YeaZ	669	Vibrio_harveyi	reduced_virulence	35.43	127	79	2	3	127	5	130	3e-20	84.3
HM-7_02656	P0A9X1	PHI:11007	ZnuC	562	Escherichia_coli	reduced_virulence	29.74	195	129	4	326	515	4	195	2e-12	65.9
HM-7_02657	P9WJR9	PHI:7748	Rv3111	1773	Mycobacterium_tuberculosis	reduced_virulence_unaffected_pathogenicity	45.96	161	83	2	4	163	8	165	3e-34	116
HM-7_02658	A0A0H3GEF3	PHI:11649	Rex	1639	Listeria_monocytogenes	increased_virulence_(hypervirulence)_reduced_virulence_unaffected_pathogenicity	67.13	216	70	1	1	216	1	215	1e-103	296
HM-7_02660	P69423	PHI:10983	TatC	562	Escherichia_coli	reduced_virulence	34.11	258	150	7	1	248	1	248	5e-42	142
HM-7_02663	A0A0H2XEK8	PHI:9877	SAUSA300_1984_(mroQ)	1280	Staphylococcus_aureus	reduced_virulence_unaffected_pathogenicity	35.76	151	88	2	91	232	89	239	1e-22	91.3
HM-7_02665	P42375	PHI:3085	GroEL	837	Porphyromonas_gingivalis	increased_virulence_(hypervirulence)	60.91	527	203	3	1	524	1	527	0	603
HM-7_02821	P36649	PHI:10985	CueO	562	Escherichia_coli	reduced_virulence	25.23	547	287	20	10	503	34	511	1e-33	132
HM-7_02823	A0A0H3MZ24	PHI:7249	MntE	1307	Streptococcus_suis	reduced_virulence	42.86	287	164	0	7	293	8	294	3e-74	232
HM-7_02827	J9VUY6	PHI:6871	Gua1	5207	Cryptococcus_neoformans	loss_of_pathogenicity	50	536	235	8	7	512	11	543	1e-171	493
HM-7_02830	G4N6T3	PHI:9356	Leu4_(MGG_13485)	318829	Magnaporthe_oryzae	reduced_virulence	40.81	571	305	10	7	548	10	576	7e-151	445
HM-7_02833	Q57RZ3	PHI:5370	RamA	28901	Salmonella_enterica	reduced_virulence	40	80	48	0	8	87	6	85	2e-18	71.6
HM-7_02838	A0A1H1XDV4	PHI:10736	AlgU	317	Pseudomonas_syringae	reduced_virulence_unaffected_pathogenicity	26.26	179	113	5	6	166	10	187	3e-15	68.6
HM-7_02841	H3RI38	PHI:3092	SoxR	66269	Pantoea_stewartii	reduced_virulence	27.09	251	180	2	1	249	1	250	6e-24	97.4
HM-7_02842	D4I4J9	PHI:10919	EaAdeP_(EAMY_3685)	552	Erwinia_amylovora	reduced_virulence	43.06	425	229	4	1	424	7	419	9e-79	249
HM-7_02848	P21264	PHI:501	ADE2	4932	Saccharomyces_cerevisiae	reduced_virulence	54.66	161	71	1	1	161	401	559	3e-50	167
HM-7_02849	Q6GAE8	PHI:10553	PurK	1280	Staphylococcus_aureus	reduced_virulence	44.6	352	184	4	10	356	10	355	1e-95	288
HM-7_02850	Q2FFI7	PHI:7345	PurB	1280	Staphylococcus_aureus	reduced_virulence	74.25	431	111	0	1	431	1	431	0	687
HM-7_02853	E0SB00	PHI:8580	PurL_(Dda3937_03379)	204038	Dickeya_dadantii	reduced_virulence	30.6	232	132	7	2	205	1041	1271	4e-16	75.1
HM-7_02854	D4HYF4	PHI:9320	PurL	552	Erwinia_amylovora	reduced_virulence	24.68	774	446	30	35	700	197	941	1e-32	134
HM-7_02855	E0SL85	PHI:8573	PurF_(Dda3937_02099)	204038	Dickeya_dadantii	reduced_virulence	40.7	484	257	14	12	470	2	480	8e-104	317
HM-7_02856	I1RFM6	PHI:744	ADE5	5518	Fusarium_graminearum	reduced_virulence	45.88	340	170	7	2	334	435	767	3e-81	261
HM-7_02857	P08179	PHI:8652	PurN	562	Escherichia_coli	unaffected_pathogenicity_reduced_virulence	35.36	181	117	0	3	183	2	182	4e-40	134
HM-7_02859	Q4UZD3	PHI:3942	XC_0509	339	Xanthomonas_campestris	reduced_virulence	50.12	423	205	4	1	417	1	423	2e-135	394
HM-7_02863	D4I307	PHI:3126_PHI:9305	ArgD	552	Erwinia_amylovora	loss_of_pathogenicity_reduced_virulence_unaffected_pathogenicity	28.54	445	258	13	3	440	12	403	2e-47	167
HM-7_02876	A3M2U3	PHI:7809	AdeN	470	Acinetobacter_baumannii	increased_virulence_(hypervirulence)	44.36	665	354	7	9	663	9	667	0	563
HM-7_02880	P32705	PHI:9229	ActP	562	Escherichia_coli	reduced_virulence_unaffected_pathogenicity	23.44	448	322	7	4	437	34	474	1e-26	111
HM-7_02882	I1S2C4	PHI:5068	MCC	5518	Fusarium_graminearum	reduced_virulence	30.66	424	254	10	60	472	76	470	1e-31	127
HM-7_02885	A6P7G9	PHI:7771	VexB	666	Vibrio_cholerae	reduced_virulence	24.83	757	539	15	316	1059	257	996	3e-44	172
HM-7_02896	J4USC3	PHI:6471	Trr2	176275	Beauveria_bassiana	reduced_virulence	26.04	288	185	7	29	296	30	309	3e-21	90.1
HM-7_02903	Q8ZNK8	PHI:11609	YeiE	28901	Salmonella_enterica	reduced_virulence	31.56	263	168	7	1	260	3	256	2e-31	117
HM-7_02907	F8U971	PHI:6157	Bcdh	40559	Botrytis_cinerea	unaffected_pathogenicity	26.06	330	224	8	8	323	44	367	8e-29	113
HM-7_02912	O54286	PHI:6884	MecA	1280	Staphylococcus_aureus	unaffected_pathogenicity	33.44	616	390	11	54	661	37	640	4e-107	337
HM-7_02913	A0A098DK45	PHI:7123	Fgvps39	5518	Fusarium_graminearum	reduced_virulence	25.76	361	235	11	85	440	579	911	2e-12	68.2
HM-7_02919	A0A0H2XHD4	PHI:6628	BcaP	1280	Staphylococcus_aureus	unaffected_pathogenicity_reduced_virulence	37.61	476	280	6	1	461	1	474	2e-64	214
HM-7_02921	A0A0H3JS81	PHI:6579	VraD	1280	Staphylococcus_aureus	reduced_virulence	27.57	243	147	7	1	235	1	222	3e-19	85.9
HM-7_02925	P0A9X1	PHI:11007	ZnuC	562	Escherichia_coli	reduced_virulence	28.88	187	120	5	342	517	23	207	6e-15	73.2
HM-7_02926	Q8Y6G5	PHI:7617	Lmo1722	1639	Listeria_monocytogenes	unaffected_pathogenicity_increased_virulence_(hypervirulence)	45.98	361	193	2	14	373	9	368	8e-103	309
HM-7_02927	Q8NJQ2	PHI:2839	RED1	5016	Bipolaris_maydis	reduced_virulence	38.46	351	195	9	1	334	1	347	5e-54	179
HM-7_02933	J9QZI8	PHI:8795	GldK_(B739_0222)	34085	Riemerella_anatipestifer	reduced_virulence_unaffected_pathogenicity	29.69	192	96	7	100	256	268	455	2e-12	64.7
HM-7_02934	P83774	PHI:3514	Asc1	5476	Candida_albicans	loss_of_pathogenicity	28.72	289	182	9	2	270	16	300	3e-18	84.3
HM-7_02938	Q9S1J0	PHI:3008	ZmpR	1313	Streptococcus_pneumoniae	unaffected_pathogenicity	28.48	158	108	2	28	184	30	183	2e-13	65.9
HM-7_02943	Q9X399	PHI:711	AphA	666	Vibrio_cholerae	reduced_virulence	31.28	179	119	3	4	182	3	177	1e-23	90.9
HM-7_02944	Q6GFE2	PHI:3285	SaNOS	1280	Staphylococcus_aureus	reduced_virulence	52.26	354	161	2	7	360	2	347	3e-131	378
HM-7_02949	D2TI55	PHI:9334	Map	67825	Citrobacter_rodentium	effector_(plant_avirulence_determinant)	36.59	246	154	2	3	247	5	249	3e-52	169
HM-7_02950	A8Z0F5	PHI:6308	GlcA	1280	Staphylococcus_aureus	reduced_virulence	41.48	499	236	13	2	449	5	498	3e-92	291
HM-7_02955	W8TNJ3	PHI:5354	LtaS	1280	Staphylococcus_aureus	increased_virulence_(hypervirulence)	48.5	635	312	6	10	638	11	636	0	581
HM-7_02957	A0A0F6B6S3	PHI:6985	McpB	28901	Salmonella_enterica	reduced_virulence	26.29	407	226	10	175	571	171	513	2e-19	90.1
HM-7_02960	P9WQ19	PHI:6732	TreS	1773	Mycobacterium_tuberculosis	reduced_virulence_unaffected_pathogenicity	27.03	555	313	12	9	525	43	543	1e-63	217
HM-7_02961	A4VTH4	PHI:5300	AgaR2	1307	Streptococcus_suis	reduced_virulence	26.73	202	147	1	30	230	42	243	1e-13	66.6
HM-7_02963	P08331	PHI:7020	CpdB	562	Escherichia_coli	reduced_virulence	45.7	604	305	10	35	621	14	611	0	551
HM-7_02966	A0A378CFB4	PHI:11408	YaaA	573	Klebsiella_pneumoniae	reduced_virulence	34.38	224	136	5	215	427	1	224	2e-14	73.2
HM-7_02967	A0A0H2ZQ64	PHI:7799	Spd1837	1313	Streptococcus_pneumoniae	unaffected_pathogenicity_reduced_virulence	35.06	154	86	3	1	153	1	141	4e-25	92.4
HM-7_02973	Q59QB4	PHI:8867	Vcx1	5476	Candida_albicans	unaffected_pathogenicity	36.14	368	207	4	13	353	44	410	2e-48	167
HM-7_02980	Q18BV2	PHI:8589	PdaA1_(CD630_14300_)	1496	Clostridioides_difficile	reduced_virulence	42.48	266	138	4	1	252	6	270	1e-65	204
HM-7_02982	J9VTH6	PHI:7813	Mgt2_(CNAG_03502)	5207	Cryptococcus_neoformans	unaffected_pathogenicity_increased_virulence_(hypervirulence)	23.08	312	212	10	25	312	479	786	2e-19	87.4
HM-7_02988	G3XCU6	PHI:8764	CysB	287	Pseudomonas_aeruginosa	reduced_virulence	25.1	243	176	4	1	237	1	243	5e-14	69.3
HM-7_02998	Q44636	PHI:4087	AtxA	1392	Bacillus_anthracis	loss_of_pathogenicity	20.31	512	343	13	4	495	7	473	1e-15	77.4
HM-7_03000	Q8XNW0	PHI:6725	Srt	1502	Clostridium_perfringens	unaffected_pathogenicity	34.88	86	54	2	102	185	97	182	5e-12	60.5
HM-7_03011	Q9S1J0	PHI:3008	ZmpR	1313	Streptococcus_pneumoniae	unaffected_pathogenicity	36.08	97	62	0	161	257	144	240	3e-11	62
HM-7_03013	Q8Z4H3	PHI:9461	IroC	28901	Salmonella_enterica	reduced_virulence	30.91	563	384	4	7	566	643	1203	5e-75	258
HM-7_03014	G7TB42	PHI:9586	XOC_3249	347	Xanthomonas_oryzae	reduced_virulence	42.55	94	53	1	15	108	18	110	2e-17	70.1
HM-7_03015	Q4ZY22	PHI:2877	Ecf11	317	Pseudomonas_syringae	unaffected_pathogenicity	27.98	168	119	2	13	179	33	199	6e-24	92
HM-7_03018	A0A0H2ZFF9	PHI:10607	FadD6_(PA14_13110)	287	Pseudomonas_aeruginosa	unaffected_pathogenicity	35.5	307	173	10	21	322	63	349	1e-28	112
HM-7_03022	Q2G2M2	PHI:7738	MprF	1280	Staphylococcus_aureus	reduced_virulence	33.77	847	542	6	4	846	6	837	4e-158	481
HM-7_03035	B1PWB6	PHI:6142	GlcV	1639	Listeria_monocytogenes	reduced_virulence	33.23	322	201	8	1	312	1	318	8e-57	185
HM-7_03037	I1RIL9	PHI:8803	FgShyC_(FGSG_03657)	5518	Fusarium_graminearum	unaffected_pathogenicity	24.8	383	230	16	2	347	9	370	6e-19	86.3
HM-7_03040	A7EZM9	PHI:4509	Ss-odc2	5180	Sclerotinia_sclerotiorum	reduced_virulence	44.92	374	200	3	9	376	107	480	3e-123	364
HM-7_03047	Q12634	PHI:685_PHI:2022	BUF_BUF1	318829	Magnaporthe_oryzae	loss_of_pathogenicity	31.25	256	162	4	5	248	30	283	2e-35	125
HM-7_03051	P9WQJ1	PHI:9596	Rv1273c	1772	Mycolicibacterium_smegmatis	increased_virulence_(hypervirulence)	28.82	583	385	8	11	580	10	575	1e-85	276
HM-7_03052	H7C7Q3	PHI:7820	OppD_(bb0334)	139	Borreliella_burgdorferi	reduced_virulence	52.79	269	124	1	3	268	2	270	3e-95	283
HM-7_03053	H7C7L2	PHI:7821	OppF_(bb0335)	139	Borreliella_burgdorferi	reduced_virulence	47.19	320	151	4	1	312	9	318	7e-95	283
HM-7_03054	J0JQ36	PHI:11168	DppA	210	Helicobacter_pylori	increased_virulence_(hypervirulence)	37.72	517	295	7	30	528	27	534	3e-115	350
HM-7_03055	A0A031WAR9	PHI:4612	App	1496	Clostridioides_difficile	increased_virulence_(hypervirulence)	32.53	332	205	1	1	332	1	313	2e-45	155
HM-7_03058	Q4UYA7	PHI:3950	XC_0892	339	Xanthomonas_campestris	reduced_virulence	46.51	430	229	1	1	430	1	429	2e-130	381
HM-7_03059	G4N1N6	PHI:5191	TPX1	318829	Magnaporthe_oryzae	reduced_virulence	38.14	118	63	3	18	132	108	218	2e-18	78.2
HM-7_03060	Q2G282	PHI:4991	PerR	1280	Staphylococcus_aureus	reduced_virulence	65.07	146	51	0	25	170	3	148	8e-73	214
HM-7_03089	W8TNJ3	PHI:5354	LtaS	1280	Staphylococcus_aureus	increased_virulence_(hypervirulence)	57.55	629	260	4	9	633	11	636	0	691
HM-7_03091	W7MS09	PHI:3385	FVEG_12529	117187	Fusarium_verticillioides	unaffected_pathogenicity	57.21	430	182	2	1	428	1	430	3e-163	465
HM-7_03093	C0RL06	PHI:11542	B0446	29459	Brucella_melitensis	unaffected_pathogenicity	36.86	236	138	3	19	247	15	246	2e-48	159
HM-7_03099	Q53763	PHI:6324	StpC	1280	Staphylococcus_aureus	unaffected_pathogenicity	29.57	230	153	5	1	230	3	223	3e-26	100
HM-7_03112	C9YKX4	PHI:8786	HatT_(CDR20291_1226)	1496	Clostridioides_difficile	reduced_virulence	27.86	341	233	5	17	346	23	361	2e-28	118
HM-7_03113	Q2YQ23	PHI:9134	Bab1_1070	235	Brucella_abortus	unaffected_pathogenicity	36.09	133	80	1	45	172	65	197	8e-20	80.9
HM-7_03115	P0A357	PHI:7638	CspB	1639	Listeria_monocytogenes	reduced_virulence	83.08	65	11	0	1	65	1	65	2e-33	107
HM-7_03116	B4EM14	PHI:8835	Bcam2836	95486	Burkholderia_cenocepacia	increased_virulence_(hypervirulence)	34.48	174	112	2	178	351	136	307	1e-29	114
HM-7_03122	O87131	PHI:9031	CheR1	287	Pseudomonas_aeruginosa	reduced_virulence	36.17	188	110	6	269	450	74	257	3e-29	116
HM-7_03123	Q9A0A2	PHI:5386	S5nA	1358	Lactococcus_lactis	increased_virulence_(hypervirulence)	30.78	497	294	12	458	908	27	519	4e-57	207
HM-7_03124	Q8XNW0	PHI:6725	Srt	1502	Clostridium_perfringens	unaffected_pathogenicity	29.77	131	83	2	58	184	59	184	4e-16	71.2
HM-7_03133	B5F8I0	PHI:8863	ArgD	28901	Salmonella_enterica	reduced_virulence	31.87	342	207	5	35	375	30	346	1e-46	164
HM-7_03136	P77432	PHI:9990	LsrK	562	Escherichia_coli	reduced_virulence	24.76	517	322	20	6	481	13	503	6e-25	106
HM-7_03137	Q8CWG4	PHI:3272	GlpD	632	Yersinia_pestis	unaffected_pathogenicity	32.62	469	281	15	43	500	55	499	8e-51	181
HM-7_03138	B5TQV9	PHI:3325	PGM	1348	Streptococcus_parauberis	reduced_virulence	50.7	574	278	3	1	572	1	571	0	578
HM-7_03139	Q99SZ7	PHI:8947	VraS	1280	Staphylococcus_aureus	increased_virulence_(hypervirulence)	33.17	199	126	3	183	376	146	342	3e-24	100
HM-7_03140	A0A0Z9GQC2	PHI:7986	VraR	1307	Streptococcus_suis	reduced_virulence	44.93	207	109	1	1	207	4	205	1e-57	179
HM-7_03143	Q8XPQ7	PHI:10662	KatE	305	Ralstonia_solanacearum	unaffected_pathogenicity	53.16	474	216	5	9	481	28	496	7e-178	507
HM-7_03144	B1MD90	PHI:9736	MAB_3134c	36809	Mycobacteroides_abscessus	reduced_virulence	30.6	134	89	2	1	133	1	131	3e-19	76.6
HM-7_03145	B0JFC8	PHI:2304	BCFHG1	40559	Botrytis_cinerea	unaffected_pathogenicity	37.16	409	232	5	2	389	3	407	4e-86	266
HM-7_03148	P0AFV4	PHI:11093	MepS	562	Escherichia_coli	reduced_virulence	41.9	105	56	4	172	272	79	182	4e-18	78.6
HM-7_03149	A0A0H2XHD4	PHI:6628	BcaP	1280	Staphylococcus_aureus	unaffected_pathogenicity_reduced_virulence	32.35	476	304	8	4	465	3	474	6e-78	249
HM-7_03152	Q4ZY22	PHI:2877	Ecf11	317	Pseudomonas_syringae	unaffected_pathogenicity	25.64	156	106	3	6	154	45	197	3e-13	63.2
HM-7_03163	A0A151V4L8	PHI:11102	SIR2_(MGG_10267)	318829	Magnaporthe_oryzae	unaffected_pathogenicity	32.13	221	112	7	19	212	38	247	1e-24	100
HM-7_03164	Q180A0	PHI:10937	PgdB_(CD630_32570)	1496	Clostridioides_difficile	unaffected_pathogenicity_increased_virulence_(hypervirulence)	32.99	197	126	1	85	281	77	267	4e-38	134
HM-7_03168	P9WQJ1	PHI:9596	Rv1273c	1772	Mycolicibacterium_smegmatis	increased_virulence_(hypervirulence)	25.81	585	411	8	11	581	5	580	2e-41	156
HM-7_03169	Q8Z4H3	PHI:9461	IroC	28901	Salmonella_enterica	reduced_virulence	32.77	534	329	11	146	666	691	1207	3e-69	244
HM-7_03173	Q8DPC2	PHI:6319	PotA	1313	Streptococcus_pneumoniae	reduced_virulence	40.38	364	193	9	9	365	11	357	2e-76	239
HM-7_03182	Q6KD45	PHI:3610	IucD	562	Escherichia_coli	reduced_virulence	31.43	420	257	8	1	407	5	406	6e-68	220
HM-7_03186	A0A088U4K2	PHI:9577	PaaB	95486	Burkholderia_cenocepacia	reduced_virulence	32.32	263	165	6	18	270	1	260	1e-25	100
HM-7_03192	Q8Y557	PHI:6413	PrsA2	1639	Listeria_monocytogenes	reduced_virulence	47.57	206	103	4	20	223	21	223	4e-50	166
HM-7_03202	Q53763	PHI:6324	StpC	1280	Staphylococcus_aureus	unaffected_pathogenicity	31.15	244	153	5	1	244	1	229	2e-28	105
HM-7_03210	Q4WUA3	PHI:2532	HEM15	746128	Aspergillus_fumigatus	lethal	27.34	289	187	7	38	307	109	393	3e-34	127
HM-7_03218	A0A171JTK6	PHI:6512	LplA1	1639	Listeria_monocytogenes	reduced_virulence	63.75	331	118	1	1	329	1	331	8e-151	425
HM-7_03219	A5F6S0	PHI:4108	FadD	666	Vibrio_cholerae	reduced_virulence_unaffected_pathogenicity	32.72	541	331	10	1	514	25	559	4e-93	293
HM-7_03221	G4MNG8	PHI:807	MGG_06951	318829	Magnaporthe_oryzae	reduced_virulence	24.55	330	226	9	94	411	109	427	1e-21	95.1
HM-7_03222	I1RGU8	PHI:5897	FGSG_02976	5518	Fusarium_graminearum	unaffected_pathogenicity	32.61	322	181	10	43	343	43	349	2e-25	104
HM-7_03223	Q4URJ2	PHI:3954	XC_3287	339	Xanthomonas_campestris	reduced_virulence	33.75	160	93	3	4	150	3	162	1e-16	73.2
HM-7_03224	A0A0H3PEF7	PHI:8613	Tlp2_(Cjj81176_0180)	197	Campylobacter_jejuni	increased_virulence_(hypervirulence)_reduced_virulence_unaffected_pathogenicity	36.69	169	89	4	254	422	500	650	4e-19	88.2
HM-7_03226	G4NES9	PHI:784	MGG_00056	318829	Magnaporthe_oryzae	reduced_virulence	33.46	260	157	7	38	282	12	270	5e-35	126
HM-7_03232	A5CVB7	PHI:3028	Vatr2	28447	Clavibacter_michiganensis	reduced_virulence	26.28	331	228	7	159	477	82	408	4e-27	111
HM-7_03235	P15029	PHI:8009	FecD	562	Escherichia_coli	reduced_virulence	26.33	319	214	9	9	313	7	318	3e-23	96.3
HM-7_03236	W9B576	PHI:7542	FepG_(VK055_1929)	573	Klebsiella_pneumoniae	reduced_virulence	23.84	281	200	5	36	313	59	328	1e-11	62.8
HM-7_03237	P15031	PHI:8010	FecE	562	Escherichia_coli	reduced_virulence	41.37	249	141	3	5	249	6	253	1e-66	205
HM-7_03239	A0A133QAP1	PHI:9935	LytR	28035	Staphylococcus_lugdunensis	reduced_virulence_unaffected_pathogenicity	30.58	291	187	8	15	297	5	288	6e-37	132
HM-7_03263	A0A0H3LPR7	PHI:9188	BB_RS07570_(BB1518)	518	Bordetella_bronchiseptica	unaffected_pathogenicity	44.19	310	155	8	1	300	1	302	7e-82	248
HM-7_03266	D4HYW4	PHI:9327	AsnB	552	Erwinia_amylovora	unaffected_pathogenicity	25.91	633	348	18	2	609	1	537	9e-46	168
HM-7_03275	Q9I168	PHI:5059	PvdH	287	Pseudomonas_aeruginosa	unaffected_pathogenicity	58.51	429	177	1	12	439	31	459	0	550
HM-7_03276	A0A059ZHI3	PHI:11014	BasG	470	Acinetobacter_baumannii	reduced_virulence	26.53	245	142	7	116	354	58	270	8e-15	74.3
HM-7_03277	B7HJA4	PHI:4078	Asba	1396	Bacillus_cereus	unaffected_pathogenicity_reduced_virulence	47.08	599	297	8	1	584	1	594	0	523
HM-7_03279	Q6KD45	PHI:3610	IucD	562	Escherichia_coli	reduced_virulence	32.94	419	267	7	11	426	5	412	4e-65	214
HM-7_03280	B7HJA5	PHI:4079	Asbb	1396	Bacillus_cereus	unaffected_pathogenicity_reduced_virulence	26.3	578	397	9	9	570	12	576	1e-67	229
HM-7_03285	Q4UQD0	PHI:3259	XC_3703	339	Xanthomonas_campestris	effector_(plant_avirulence_determinant)_reduced_virulence	37.74	159	97	2	6	163	3	160	4e-34	116
HM-7_03286	Q2FYP3	PHI:2966	CvfB	1280	Staphylococcus_aureus	reduced_virulence	36.19	268	151	5	26	278	32	294	1e-51	169
HM-7_03288	Q882U6	PHI:10940	PSPTO_2526	317	Pseudomonas_syringae	reduced_virulence	25.55	407	258	8	147	546	189	557	1e-15	77.8
HM-7_03289	A0A4T9YUF5	PHI:10346	FakB2	1280	Staphylococcus_aureus	unaffected_pathogenicity	26.28	274	197	1	5	278	6	274	4e-31	115
HM-7_03299	G5EH72	PHI:5233	MoARG5_6	318829	Magnaporthe_oryzae	loss_of_pathogenicity	26.55	339	201	11	18	342	595	899	2e-23	99.8
HM-7_03300	A4R5F6	PHI:5234	MoARG7	318829	Magnaporthe_oryzae	reduced_virulence	39.67	421	218	10	19	406	47	464	5e-89	275
HM-7_03301	Q2FK80	PHI:2633	ArgB	1280	Staphylococcus_aureus	unaffected_pathogenicity	32.69	260	157	8	3	252	2	253	1e-36	128
HM-7_03302	B5F8I0	PHI:8863	ArgD	28901	Salmonella_enterica	reduced_virulence	40.86	372	207	4	17	376	30	400	5e-92	280
HM-7_03303	G4MVB1	PHI:11593	MoCpa1_(MGG_01743)	318829	Magnaporthe_oryzae	reduced_virulence	37.91	364	205	6	1	344	71	433	4e-79	248
HM-7_03305	Q725C8	PHI:9501	AguB_(LMOf2365_0045)	1639	Listeria_monocytogenes	reduced_virulence	45.78	308	158	5	13	311	5	312	7e-77	237
HM-7_03314	P20582	PHI:3522	PqsD	287	Pseudomonas_aeruginosa	reduced_virulence	35.35	331	186	6	2	309	3	328	6e-50	167
HM-7_03315	I1RSU2	PHI:724_PHI:730	PKS9_KSA1	5518	Fusarium_graminearum	unaffected_pathogenicity	44.6	426	218	6	4	411	2	427	6e-119	351
HM-7_03317	H7C7Q3	PHI:7820	OppD_(bb0334)	139	Borreliella_burgdorferi	reduced_virulence	56.49	262	114	0	4	265	6	267	3e-89	267
HM-7_03318	H7C7L2	PHI:7821	OppF_(bb0335)	139	Borreliella_burgdorferi	reduced_virulence	44.88	332	162	6	14	339	3	319	4e-91	273
HM-7_03319	J0JQ36	PHI:11168	DppA	210	Helicobacter_pylori	increased_virulence_(hypervirulence)	28.57	511	312	16	45	526	32	518	9e-49	175
HM-7_03320	A0A031WAR9	PHI:4612	App	1496	Clostridioides_difficile	increased_virulence_(hypervirulence)	40.95	315	184	2	1	315	1	313	2e-86	261
HM-7_03324	Q2YKG0	PHI:9130	Bab2_0700	235	Brucella_abortus	reduced_virulence	33.86	502	305	11	38	527	21	507	1e-82	265
HM-7_03325	Q18A49	PHI:4611	Opp	1496	Clostridioides_difficile	increased_virulence_(hypervirulence)	27.61	326	217	5	1	311	1	322	7e-41	143
HM-7_03327	Q7NAX1	PHI:7715	MGA_0220	2096	Mycoplasma_gallisepticum	reduced_virulence	41.83	404	163	7	6	348	21	413	6e-109	324
HM-7_03328	H7C7L2	PHI:7821	OppF_(bb0335)	139	Borreliella_burgdorferi	reduced_virulence	50.16	311	132	6	3	292	6	314	2e-98	291
HM-7_03331	Q9RGX0	PHI:6967	SpxA1	1639	Listeria_monocytogenes	reduced_virulence_unaffected_pathogenicity	84.73	131	20	0	1	131	1	131	2e-83	238
HM-7_03333	Q2FI79	PHI:7352	MecA	1280	Staphylococcus_aureus	unaffected_pathogenicity	35.29	238	132	5	1	220	1	234	1e-31	114
HM-7_03334	D0C777	PHI:5092	PLD1	470	Acinetobacter_baumannii	reduced_virulence	24.12	369	201	9	162	453	66	432	3e-14	73.6
HM-7_03335	B2IPD1	PHI:4705	CoiA	1313	Streptococcus_pneumoniae	unaffected_pathogenicity	33.33	135	81	3	87	216	26	156	6e-13	67.8
HM-7_03338	Q8Y8E0	PHI:10419	YjbH_(lmo0964)	1639	Listeria_monocytogenes	reduced_virulence	36.84	266	155	3	19	283	15	268	5e-59	188
HM-7_03339	A0A0H2XHR2	PHI:9876	YjbH_(SAUSA300_0903)	1280	Staphylococcus_aureus	increased_virulence_(hypervirulence)	54.7	117	53	0	7	123	4	120	2e-43	137
HM-7_03343	W8TMV6	PHI:11282	RelP	1280	Staphylococcus_aureus	reduced_virulence_unaffected_pathogenicity	64.36	202	71	1	5	205	3	204	2e-96	278
HM-7_03348	G2X6A8	PHI:10410	VdTHI20	27337	Verticillium_dahliae	reduced_virulence	27.32	205	136	5	15	211	317	516	6e-15	72
HM-7_03353	G4MLK2	PHI:8040_PHI:8047	Mouba2_Uba2	318829	Magnaporthe_oryzae	reduced_virulence	23.39	171	128	2	12	181	56	224	1e-11	63.9
HM-7_03354	G2X6A8	PHI:10410	VdTHI20	27337	Verticillium_dahliae	reduced_virulence	34.86	284	156	4	5	259	7	290	2e-40	144
HM-7_03355	Q2FZQ3	PHI:7915	FabI	1280	Staphylococcus_aureus	reduced_virulence_unaffected_pathogenicity	59.84	254	102	0	3	256	2	255	2e-104	301
HM-7_03372	A0A0K0GQB7	PHI:9986	MetB_(PXO_03157)	347	Xanthomonas_oryzae	reduced_virulence	45.01	371	185	4	24	375	25	395	1e-109	325
HM-7_03373	A0A0K0GQB7	PHI:9986	MetB_(PXO_03157)	347	Xanthomonas_oryzae	reduced_virulence	47.62	378	195	3	7	381	16	393	5e-117	344
HM-7_03396	Q8ZNK8	PHI:11609	YeiE	28901	Salmonella_enterica	reduced_virulence	27.1	262	177	5	1	256	3	256	7e-30	112
HM-7_03400	Q7CPB9	PHI:11385	OxyR	28901	Salmonella_enterica	reduced_virulence	30.95	294	191	6	1	287	1	289	4e-32	119
HM-7_03402	Q5ZVD8	PHI:6520	LpdA	446	Legionella_pneumophila	effector_(plant_avirulence_determinant)	39.38	452	265	6	8	452	13	462	1e-91	285
HM-7_03407	A0KL98	PHI:11459	Alr-2	644	Aeromonas_hydrophila	reduced_virulence	34.42	369	219	12	12	377	8	356	5e-50	171
HM-7_03408	C4YN44	PHI:4903	Fdh3	5476	Candida_albicans	unaffected_pathogenicity_reduced_virulence	32.09	349	227	7	24	364	34	380	2e-40	145
HM-7_03411	Q9RQU7	PHI:3125	Flagellin	1496	Clostridioides_difficile	reduced_virulence	47.91	311	131	5	1	302	1	289	8e-65	204
HM-7_03413	Q9RQU7	PHI:3125	Flagellin	1496	Clostridioides_difficile	reduced_virulence	49.48	291	126	5	1	272	1	289	9e-67	207
HM-7_03415	A0A0H3PEF7	PHI:8613	Tlp2_(Cjj81176_0180)	197	Campylobacter_jejuni	increased_virulence_(hypervirulence)_reduced_virulence_unaffected_pathogenicity	33.33	162	97	2	105	266	481	631	2e-17	80.5
HM-7_03423	A0A2S6D5Q7	PHI:9451	PitA	1280	Staphylococcus_aureus	unaffected_pathogenicity_reduced_virulence	65.41	318	107	2	15	329	15	332	7e-137	390
HM-7_03426	O25743	PHI:3146	GGT	210	Helicobacter_pylori	unaffected_pathogenicity	38.14	582	319	12	1	566	6	562	6e-118	359
HM-7_03430	Q8DPC2	PHI:6319	PotA	1313	Streptococcus_pneumoniae	reduced_virulence	46.41	237	121	2	3	237	6	238	2e-66	208
HM-7_03435	Q0UA24	PHI:2256	Xdh1	13684	Parastagonospora_nodorum	unaffected_pathogenicity	30.66	349	223	7	3	339	16	357	3e-46	159
HM-7_03436	S8ENF7	PHI:11455	Pdh-e1alpha	5811	Toxoplasma_gondii	unaffected_pathogenicity	34.33	335	205	2	8	327	245	579	2e-58	196
HM-7_03437	A5IXN3	PHI:4610	PdhB	2110	Mycoplasmopsis_agalactiae	reduced_virulence	45.57	316	164	5	14	323	11	324	3e-72	225
HM-7_03438	Q2FH26	PHI:7353	OdhB	1280	Staphylococcus_aureus	unaffected_pathogenicity	28.1	459	272	7	1	440	1	420	5e-55	187
HM-7_03439	P9WHH9	PHI:7582	Rv0462_(lpdC)	1773	Mycobacterium_tuberculosis	increased_virulence_(hypervirulence)	36.66	461	282	8	5	458	4	461	6e-68	223
HM-7_03441	B9J010	PHI:4077	EntA	1396	Bacillus_cereus	reduced_virulence	34.96	246	151	2	12	249	9	253	2e-27	105
HM-7_03442	P76141	PHI:9991	LsrR	562	Escherichia_coli	reduced_virulence	31.11	315	199	6	6	314	15	317	4e-39	139
HM-7_03444	A0A0H2XHD4	PHI:6628	BcaP	1280	Staphylococcus_aureus	unaffected_pathogenicity_reduced_virulence	23.09	433	289	11	2	398	10	434	6e-13	68.6
HM-7_03446	A0A0E0USK4	PHI:7069	HtrA	1639	Listeria_monocytogenes	reduced_virulence_unaffected_pathogenicity	50.87	287	136	3	147	429	208	493	7e-90	280
HM-7_03449	A0A031WAR9	PHI:4612	App	1496	Clostridioides_difficile	increased_virulence_(hypervirulence)	32.41	290	183	4	31	309	31	318	8e-44	150
HM-7_03451	H7C7Q3	PHI:7820	OppD_(bb0334)	139	Borreliella_burgdorferi	reduced_virulence	56.49	262	114	0	2	263	4	265	1e-94	281
HM-7_03452	Q2YKG0	PHI:9130	Bab2_0700	235	Brucella_abortus	reduced_virulence	32.11	517	331	9	31	536	16	523	1e-83	268
HM-7_03456	H7C7L2	PHI:7821	OppF_(bb0335)	139	Borreliella_burgdorferi	reduced_virulence	43.6	328	160	4	4	320	6	319	2e-87	263
HM-7_03463	I1RYE2	PHI:1459	GzAra007	5518	Fusarium_graminearum	unaffected_pathogenicity	29.89	174	110	4	11	173	25	197	3e-15	72.4
HM-7_03467	P08179	PHI:8652	PurN	562	Escherichia_coli	unaffected_pathogenicity_reduced_virulence	32.41	145	97	1	151	294	50	194	3e-20	85.5
HM-7_03469	A5ICA4	PHI:11263	ProA	446	Legionella_pneumophila	reduced_virulence	45.33	375	194	6	47	415	48	417	1e-92	283
HM-7_03472	A0A0H6ZQK4	PHI:5549	OhrR	666	Vibrio_cholerae	reduced_virulence	48.59	142	73	0	2	143	10	151	5e-42	135
HM-7_03475	D4HUM7	PHI:9315	MetE	552	Erwinia_amylovora	reduced_virulence	46.81	767	383	13	1	756	1	753	0	608
HM-7_03477	I1RGU8	PHI:5897	FGSG_02976	5518	Fusarium_graminearum	unaffected_pathogenicity	37.56	221	114	6	41	254	140	343	3e-32	122
HM-7_03479	B3VA60	PHI:4198_PHI:4846	CovR	1314	Streptococcus_pyogenes	increased_virulence_(hypervirulence)_reduced_virulence	52.68	224	104	2	5	227	4	226	1e-68	209
HM-7_03480	D4QE70	PHI:8604_PHI:8605	CovS_CovR	1314	Streptococcus_pyogenes	unaffected_pathogenicity_increased_virulence_(hypervirulence)_reduced_virulence	30.68	339	218	11	120	445	156	490	9e-38	142
HM-7_03491	Q9HVI8	PHI:4684	MorA	287	Pseudomonas_aeruginosa	increased_virulence_(hypervirulence)	41.67	444	255	2	352	791	954	1397	7e-110	364
HM-7_03504	B2SME5	PHI:2729	PdeK	347	Xanthomonas_oryzae	reduced_virulence	28.89	270	145	8	500	726	143	408	4e-29	118
HM-7_03509	A0A0K0GPI8	PHI:9989	AspC_(PXO_02420)	347	Xanthomonas_oryzae	reduced_virulence	26.63	383	254	10	20	383	26	400	1e-29	117
HM-7_03515	A0A0K0GHD4	PHI:6118	SreS	347	Xanthomonas_oryzae	unaffected_pathogenicity	29.06	234	158	4	268	496	130	360	2e-25	107
HM-7_03517	D4I231	PHI:7440	EAMY_3224	552	Erwinia_amylovora	unaffected_pathogenicity_increased_virulence_(hypervirulence)_reduced_virulence	35.78	109	66	1	140	248	431	535	6e-15	72
HM-7_03520	V5VGK1	PHI:11207	ClpB	470	Acinetobacter_baumannii	reduced_virulence	47.44	704	289	11	64	692	148	845	0	587
HM-7_03531	Q04LM7	PHI:3911	Etrx1	1313	Streptococcus_pneumoniae	unaffected_pathogenicity	34.55	110	69	2	52	158	71	180	2e-17	74.3
HM-7_03532	Q99Z27	PHI:7043	PmtA	1314	Streptococcus_pyogenes	reduced_virulence	45.9	586	305	5	55	636	40	617	1e-172	504
HM-7_03533	A0A0H3PAK7	PHI:10727	PepP_(CJJ81176_0681)	197	Campylobacter_jejuni	reduced_virulence	29.36	235	142	8	133	347	292	522	7e-14	71.2
HM-7_03534	H7C6V6	PHI:11334	CcpA	1351	Enterococcus_faecalis	reduced_virulence	28.13	327	226	6	4	323	8	332	6e-31	117
HM-7_03535	P11989	PHI:4630	PafR	562	Escherichia_coli	reduced_virulence	30.43	276	188	3	5	279	2	274	5e-42	144
HM-7_03536	A8Z3D6	PHI:6309	GlcB	1280	Staphylococcus_aureus	reduced_virulence	58.01	693	267	8	1	684	1	678	0	745
HM-7_03537	P99143	PHI:11269	PtsH	1280	Staphylococcus_aureus	reduced_virulence	65.12	86	30	0	1	86	1	86	1e-37	119
HM-7_03538	Q99Z66	PHI:8022	PtsI	1314	Streptococcus_pyogenes	increased_virulence_(hypervirulence)	61.75	570	214	3	2	567	3	572	0	691
HM-7_03541	Q882U6	PHI:10940	PSPTO_2526	317	Pseudomonas_syringae	reduced_virulence	29.26	311	182	5	292	592	226	508	3e-28	117
HM-7_03542	Q8Y0J2	PHI:5271	FabG1	305	Ralstonia_solanacearum	lethal	34.9	255	151	6	5	257	5	246	1e-37	131
HM-7_03546	Q9HV74	PHI:3440	CbrA	287	Pseudomonas_aeruginosa	reduced_virulence_unaffected_pathogenicity	30.74	257	151	6	368	606	727	974	9e-29	120
HM-7_03547	A0A0K0GPI8	PHI:9989	AspC_(PXO_02420)	347	Xanthomonas_oryzae	reduced_virulence	27.85	395	255	14	13	384	21	408	8e-38	139
HM-7_03548	A0A0H3MZ24	PHI:7249	MntE	1307	Streptococcus_suis	reduced_virulence	24.83	290	211	3	1	286	1	287	9e-26	103
HM-7_03552	A0A0J9WWX5	PHI:8985	PXO_RS11880/_PXO_RS12810	347	Xanthomonas_oryzae	unaffected_pathogenicity	28.08	292	200	7	12	297	16	303	6e-21	89.4
HM-7_03561	A0A518VKX7	PHI:10587	KduD	554	Pectobacterium_carotovorum	unaffected_pathogenicity	32.52	246	161	4	4	249	11	251	1e-30	112
HM-7_03562	B4E974	PHI:8841	Bcal0652	95486	Burkholderia_cenocepacia	increased_virulence_(hypervirulence)	27.07	351	227	12	18	353	41	377	1e-20	91.3
HM-7_03568	A0A0H3KEX5	PHI:5242	CcpE	1280	Staphylococcus_aureus	increased_virulence_(hypervirulence)	31.83	289	192	3	1	289	1	284	4e-53	173
HM-7_03577	B0LFQ7	PHI:3523	Bx-Prx	6326	Bursaphelenchus_xylophilus	loss_of_pathogenicity	52.17	184	81	3	1	180	1	181	7e-64	193
HM-7_03582	G4MLK2	PHI:8040_PHI:8047	Mouba2_Uba2	318829	Magnaporthe_oryzae	reduced_virulence	29.07	172	113	4	14	181	58	224	3e-13	68.9
HM-7_03590	Q8ZQE4	PHI:3928	MacB	28901	Salmonella_enterica	reduced_virulence	48.87	221	113	0	1	221	4	224	1e-70	226
HM-7_03591	Q8ZQE4	PHI:3928	MacB	28901	Salmonella_enterica	reduced_virulence	32.66	398	258	8	5	397	256	648	1e-42	156
HM-7_03592	Q1J773	PHI:6503	FruR	1314	Streptococcus_pyogenes	unaffected_pathogenicity	42.99	214	120	2	16	229	6	217	2e-53	171
HM-7_03593	J7M380	PHI:6504	FruB	1314	Streptococcus_pyogenes	unaffected_pathogenicity	45.7	302	164	0	1	302	1	302	4e-92	274
HM-7_03594	O51369	PHI:6524	FruA1	139	Borreliella_burgdorferi	unaffected_pathogenicity	35.08	630	375	14	5	619	4	614	5e-84	274
HM-7_03597	B2SRG1	PHI:1141	RaxB	347	Xanthomonas_oryzae	increased_virulence_(hypervirulence)	26.92	234	144	8	2	230	487	698	3e-15	77
HM-7_03598	Q8Y6T0	PHI:5368	Lmo1603	1639	Listeria_monocytogenes	reduced_virulence	23.68	359	225	12	5	355	3	320	1e-18	85.1
HM-7_03602	A0A0K0GHD4	PHI:6118	SreS	347	Xanthomonas_oryzae	unaffected_pathogenicity	30.23	258	172	6	175	428	112	365	1e-29	119
HM-7_03606	Q836D0	PHI:7056_PHI:11495	RnjB_RnjB_(EF1185)	1351	Enterococcus_faecalis	reduced_virulence	42.96	547	308	4	11	554	6	551	5e-151	443
HM-7_03612	Q1KSF2	PHI:3102	BCKDH	5811	Toxoplasma_gondii	reduced_virulence	34.28	353	218	7	26	366	94	444	1e-51	177
HM-7_03613	A5IXN3	PHI:4610	PdhB	2110	Mycoplasmopsis_agalactiae	reduced_virulence	46.67	300	156	2	1	296	1	300	1e-86	262
HM-7_03614	Q2FH26	PHI:7353	OdhB	1280	Staphylococcus_aureus	unaffected_pathogenicity	34.23	447	264	10	4	447	3	422	7e-62	205
HM-7_03615	Q5ZVD8	PHI:6520	LpdA	446	Legionella_pneumophila	effector_(plant_avirulence_determinant)	42.73	461	257	4	8	464	10	467	1e-113	342
HM-7_03617	Q8XWV5	PHI:7723	SpeC_(RSc2365)	305	Ralstonia_solanacearum	loss_of_pathogenicity	28.11	402	240	14	13	372	153	547	5e-23	101
HM-7_03621	Q02RX2	PHI:3915	SuhB	287	Pseudomonas_aeruginosa	loss_of_pathogenicity	34.75	236	140	6	35	262	33	262	7e-35	125
HM-7_03624	P0A2F0	PHI:2680	RpoE	28901	Salmonella_enterica	reduced_virulence	30.67	150	94	3	24	166	40	186	2e-16	71.2
HM-7_03628	A0A380PIP1	PHI:11030	BipA	632	Yersinia_pestis	reduced_virulence	55.03	596	268	0	5	600	3	598	0	649
HM-7_03636	P9WN99	PHI:7982	RodA	1773	Mycobacterium_tuberculosis	unaffected_pathogenicity_reduced_virulence	30.35	369	218	12	2	350	70	419	7e-24	101
HM-7_03637	I1S2C4	PHI:5068	MCC	5518	Fusarium_graminearum	reduced_virulence	37.73	485	283	7	3	485	640	1107	9e-94	329
HM-7_03638	J4KQS2	PHI:8671	Phr1_(EJP69699)	176275	Beauveria_bassiana	unaffected_pathogenicity	35.03	491	284	13	2	466	96	577	3e-86	274
HM-7_03640	W8U4S5	PHI:10293_PHI:10292	CtaB	1280	Staphylococcus_aureus	unaffected_pathogenicity_increased_virulence_(hypervirulence)	46.83	284	150	1	23	305	17	300	1e-77	237
HM-7_03642	A6QFR9	PHI:4038	QoxB	1280	Staphylococcus_aureus	reduced_virulence	50	618	294	9	15	623	39	650	0	560
HM-7_03647	P9WJA3	PHI:7581	Rv2626c	1773	Mycobacterium_tuberculosis	reduced_virulence_increased_virulence_(hypervirulence)	38.14	97	58	2	26	120	24	120	2e-18	75.1
HM-7_03658	O53340	PHI:9827	Rv3194c	1772	Mycolicibacterium_smegmatis	unaffected_pathogenicity	28	350	217	11	4	337	1	331	2e-21	91.7
HM-7_03667	P60392	PHI:4961	RsmH	1280	Staphylococcus_aureus	reduced_virulence	66.23	308	104	0	1	308	1	308	5e-154	432
HM-7_03669	O54286	PHI:6884	MecA	1280	Staphylococcus_aureus	unaffected_pathogenicity	25.74	470	243	19	58	469	145	566	2e-16	81.3
HM-7_03670	O54286	PHI:6884	MecA	1280	Staphylococcus_aureus	unaffected_pathogenicity	25.62	566	319	25	55	567	147	663	2e-23	103
HM-7_03671	Q9HVZ7	PHI:7632	MurF	287	Pseudomonas_aeruginosa	unaffected_pathogenicity_loss_of_pathogenicity	24.04	391	257	12	1	380	5	366	2e-20	92.4
HM-7_03674	Q9HVZ9	PHI:7631	MurD	287	Pseudomonas_aeruginosa	reduced_virulence_loss_of_pathogenicity	30.92	456	286	15	4	445	7	447	2e-47	167
HM-7_03675	P9WN99	PHI:7982	RodA	1773	Mycobacterium_tuberculosis	unaffected_pathogenicity_reduced_virulence	33.68	285	176	2	82	355	163	445	1e-31	122
HM-7_03676	C0RE70	PHI:11554	A1479	29459	Brucella_melitensis	reduced_virulence	30.85	363	243	6	3	363	10	366	6e-45	157
HM-7_03684	C5AG42	PHI:8850	PrtA_(bglu_1g16590)	337	Burkholderia_glumae	reduced_virulence	27.25	378	211	11	183	513	146	506	1e-16	82.8
HM-7_03686	D4HX24	PHI:3336	RpoS	552	Erwinia_amylovora	reduced_virulence_unaffected_pathogenicity	28.91	256	126	6	31	233	63	315	9e-21	87.4
HM-7_03687	P95844	PHI:9446	SigB	1280	Staphylococcus_aureus	reduced_virulence_unaffected_pathogenicity	30.54	239	162	3	22	256	14	252	1e-29	110
HM-7_03688	P76141	PHI:9991	LsrR	562	Escherichia_coli	reduced_virulence	30.77	312	189	10	12	312	21	316	1e-41	145
HM-7_03691	A0A0F6B5P2	PHI:10052	STM14_RS15195_(srlA)	28901	Salmonella_enterica	unaffected_pathogenicity	44.52	146	81	0	1	146	2	147	3e-41	135
HM-7_03692	A0A0F6B5P3	PHI:10053	STM14_RS15200_(srlE)	28901	Salmonella_enterica	unaffected_pathogenicity	50.3	334	150	6	5	336	3	322	1e-92	278
HM-7_03694	A0A0F6B5S9	PHI:10083	STM14_RS15350	28901	Salmonella_enterica	unaffected_pathogenicity	24.51	257	175	5	12	257	16	264	4e-20	85.5
HM-7_03700	D5AGD5	PHI:8003	DivIVA	1307	Streptococcus_suis	reduced_virulence	37.42	163	91	1	1	152	1	163	2e-33	116
HM-7_03703	Q9A0D2	PHI:9799	AdcAII	1314	Streptococcus_pyogenes	reduced_virulence_unaffected_pathogenicity	48.12	133	67	1	9	141	12	142	6e-29	102
HM-7_03705	P65946	PHI:8614	PyrR_(SP_1278)	1313	Streptococcus_pneumoniae	loss_of_pathogenicity_unaffected_pathogenicity_reduced_virulence	51.67	180	79	3	1	180	1	172	2e-58	179
HM-7_03707	P65607	PHI:3474	ArcB	1313	Streptococcus_pneumoniae	reduced_virulence	30.13	302	169	10	26	291	37	332	1e-18	83.2
HM-7_03709	D4I0H1	PHI:9328	CarA	552	Erwinia_amylovora	reduced_virulence	46.2	368	176	5	5	350	16	383	2e-101	303
HM-7_03712	Q4D3W2	PHI:2575_PHI:2596	DHOD	5693	Trypanosoma_cruzi	lethal	29.64	307	205	8	2	298	4	309	7e-26	103
HM-7_03716	Q4WWN9	PHI:2518	MET16	746128	Aspergillus_fumigatus	lethal	39.9	203	113	4	38	232	74	275	7e-39	135
HM-7_03718	Q8TG24	PHI:265	MET3	5207	Cryptococcus_neoformans	loss_of_pathogenicity	37.41	401	214	12	1	371	1	394	3e-72	234
HM-7_03719	B2SI02	PHI:1139	RaxQ	347	Xanthomonas_oryzae	increased_virulence_(hypervirulence)	48.4	188	97	0	5	192	407	594	1e-59	194
HM-7_03724	A0A076ZK37	PHI:7492	VK055_1980	573	Klebsiella_pneumoniae	unaffected_pathogenicity	39.86	863	497	14	22	875	11	860	5e-174	525
HM-7_03732	A6QGB6	PHI:3999	FMT	1280	Staphylococcus_aureus	reduced_virulence	54.66	311	139	2	1	310	1	310	2e-124	357
HM-7_03733	Q6D000	PHI:2694	RsmB	29471	Pectobacterium_atrosepticum	loss_of_pathogenicity_reduced_virulence	34.28	458	260	13	1	446	1	429	3e-68	222
HM-7_03735	Q9RL81	PHI:10175	Stp1	1280	Staphylococcus_aureus	reduced_virulence	42.86	252	137	2	2	253	1	245	2e-63	197
HM-7_03736	R9RJ65	PHI:4155_PHI:8151	Stk	1307	Streptococcus_suis	reduced_virulence	40.84	573	321	9	3	563	4	570	4e-126	386
HM-7_03745	Q81J94	PHI:6483	Mfd	1396	Bacillus_cereus	loss_of_pathogenicity	38.02	405	229	6	230	625	597	988	7e-63	225
HM-7_03747	X5ELF9	PHI:10347	PlsX	1280	Staphylococcus_aureus	reduced_virulence	59.03	310	123	2	1	309	2	308	2e-132	378
HM-7_03748	Q99UN8	PHI:7916	FabD	1280	Staphylococcus_aureus	reduced_virulence	49.83	297	145	2	1	295	1	295	4e-98	290
HM-7_03749	Q8Y0J2	PHI:5271	FabG1	305	Ralstonia_solanacearum	lethal	55.51	245	108	1	2	246	5	248	5e-91	267
HM-7_03751	Q82ZG1	PHI:11496	Rnc_(EF3097)	1351	Enterococcus_faecalis	reduced_virulence	56.59	205	89	0	20	224	8	212	2e-80	239
HM-7_03752	Q9I3I6	PHI:7016	Smc	287	Pseudomonas_aeruginosa	reduced_virulence	50	216	107	1	971	1186	947	1161	5e-59	220
HM-7_03753	O52908	PHI:8627	FlhF	197	Campylobacter_jejuni	reduced_virulence	29.06	203	128	8	122	320	284	474	3e-13	68.6
HM-7_03765	P76299	PHI:11174	FlhB	562	Escherichia_coli	reduced_virulence	42.17	83	47	1	4	85	267	349	4e-14	63.9
HM-7_03768	Q8DPI7	PHI:11059	DprA	1313	Streptococcus_pneumoniae	reduced_virulence_increased_virulence_(hypervirulence)	45.81	227	118	3	68	291	58	282	2e-59	189
HM-7_03773	Q8PBY5	PHI:9833	ClpX	339	Xanthomonas_campestris	reduced_virulence	32.07	237	96	6	258	434	159	390	7e-24	102
HM-7_03774	B7HLG1	PHI:2982	CodY	1396	Bacillus_cereus	reduced_virulence	80.31	259	51	0	1	259	1	259	3e-141	395
HM-7_03781	A0A0H3LK50	PHI:9184	BscN	518	Bordetella_bronchiseptica	unaffected_pathogenicity	52.43	412	189	3	20	427	25	433	9e-145	418
HM-7_03789	Q72RB2	PHI:6194	FliM	173	Leptospira_interrogans	reduced_virulence	46.54	318	169	1	4	320	3	320	1e-98	293
HM-7_03791	Q6DL91	PHI:4690	DegU	1639	Listeria_monocytogenes	reduced_virulence	38.79	116	70	1	1	115	1	116	1e-20	81.3
HM-7_03793	A0A0F6B111	PHI:10149	STM14_RS07950_(ssaR)	28901	Salmonella_enterica	reduced_virulence	38.5	200	116	3	28	221	16	214	2e-33	118
HM-7_03795	Q8Z6N5	PHI:629	SsaT	28901	Salmonella_enterica	reduced_virulence	26.58	158	114	1	61	218	67	222	6e-14	68.2
HM-7_03796	P76299	PHI:11174	FlhB	562	Escherichia_coli	reduced_virulence	38.79	348	207	2	15	359	7	351	3e-67	215
HM-7_03797	P40729	PHI:8731	FlhA	28901	Salmonella_enterica	reduced_virulence	41.71	633	349	5	47	670	63	684	1e-123	381
HM-7_03798	O52908	PHI:8627	FlhF	197	Campylobacter_jejuni	reduced_virulence	33.33	141	93	1	219	358	321	461	4e-19	86.7
HM-7_03800	P04042	PHI:6461	CheB	28901	Salmonella_enterica	reduced_virulence	39.55	359	201	3	2	360	4	346	4e-77	239
HM-7_03801	P07363	PHI:6535	CheA	562	Escherichia_coli	reduced_virulence_unaffected_pathogenicity	42.45	384	212	4	295	673	261	640	1e-98	315
HM-7_03802	P0A964	PHI:6536	CheW	562	Escherichia_coli	unaffected_pathogenicity	28.78	139	99	0	7	145	15	153	3e-22	85.5
HM-7_03805	P45684	PHI:10649	RpoS	287	Pseudomonas_aeruginosa	unaffected_pathogenicity	28.24	255	170	6	4	251	76	324	3e-17	78.2
HM-7_03814	A0A0H2XJD2	PHI:11079	Eep_(SAUSA300_1155)	1280	Staphylococcus_aureus	reduced_virulence	40.81	397	223	4	32	419	1	394	2e-101	306
HM-7_03819	G4MTF8	PHI:2204	Endo-1_4-beta-xylanase_[GH10_family]	318829	Magnaporthe_oryzae	reduced_virulence	27.9	276	181	7	59	323	37	305	2e-28	112
HM-7_03823	Q8DQV4	PHI:3149	Spr0479	1313	Streptococcus_pneumoniae	lethal	48.1	79	40	1	1	79	1	78	6e-22	80.5
HM-7_03825	A0A380PIP1	PHI:11030	BipA	632	Yersinia_pestis	reduced_virulence	35.77	137	72	1	212	332	8	144	4e-14	74.3
HM-7_03831	Q8ZLT3	PHI:3878	Pnp	28901	Salmonella_enterica	reduced_virulence	49.78	683	337	3	12	691	11	690	0	654
HM-7_03832	Q8Y9V5	PHI:4689	PgdA	1639	Listeria_monocytogenes	reduced_virulence	36.09	169	104	2	147	314	284	449	2e-33	126
HM-7_03833	O25656	PHI:11338	PqqE_(HP1012)	210	Helicobacter_pylori	reduced_virulence_unaffected_pathogenicity	26.92	364	244	10	3	350	34	391	5e-25	104
HM-7_03839	W7MS01	PHI:3389	FVEG_12521	117187	Fusarium_verticillioides	unaffected_pathogenicity	26.32	380	221	12	66	400	140	505	9e-20	89.4
HM-7_03841	Q836D0	PHI:7056_PHI:11495	RnjB_RnjB_(EF1185)	1351	Enterococcus_faecalis	reduced_virulence	46.17	548	293	2	9	554	4	551	1e-161	470
HM-7_03844	Q8YAQ5	PHI:7805	EssC_(lmo0061)	1639	Listeria_monocytogenes	increased_virulence_(hypervirulence)	34.08	223	133	9	495	713	654	866	3e-22	101
HM-7_03845	A4VTH4	PHI:5300	AgaR2	1307	Streptococcus_suis	reduced_virulence	27.27	242	173	2	1	240	9	249	2e-23	93.6
HM-7_03847	R4UG28	PHI:5348	MmpL4a	36809	Mycobacteroides_abscessus	increased_virulence_(hypervirulence)	24.57	350	251	3	688	1037	599	935	4e-29	124
HM-7_03851	R4UG28	PHI:5348	MmpL4a	36809	Mycobacteroides_abscessus	increased_virulence_(hypervirulence)	26.51	215	157	1	782	996	681	894	2e-23	105
HM-7_03852	Q8Y0J2	PHI:5271	FabG1	305	Ralstonia_solanacearum	lethal	32.23	242	161	2	2	241	7	247	6e-36	126
HM-7_03858	P0A452	PHI:4702	RecA	1313	Streptococcus_pneumoniae	reduced_virulence	67.05	346	109	2	2	342	17	362	2e-157	444
HM-7_03859	Q82Z99	PHI:11493	Rny_(EF3170)	1351	Enterococcus_faecalis	reduced_virulence	76.36	423	100	0	98	520	96	518	0	603
HM-7_03862	A6P7H1	PHI:7772	VexD	666	Vibrio_cholerae	reduced_virulence	25.59	1024	702	28	12	1007	14	1005	1e-65	238
HM-7_03863	Q0UA24	PHI:2256	Xdh1	13684	Parastagonospora_nodorum	unaffected_pathogenicity	31.27	339	214	8	21	347	29	360	5e-44	154
HM-7_03864	Q9AI28	PHI:5347	WcbT	28450	Burkholderia_pseudomallei	reduced_virulence	33.06	363	240	3	28	387	77	439	7e-65	211
HM-7_03868	Q5KN74	PHI:7207	Msh2	5207	Cryptococcus_neoformans	unaffected_pathogenicity	32.73	556	339	13	278	801	347	899	4e-81	280
HM-7_03869	J9VQQ5	PHI:7208	Mlh1	5207	Cryptococcus_neoformans	unaffected_pathogenicity	34.82	359	209	5	4	337	32	390	3e-59	210
HM-7_03873	P9WJG3	PHI:7578	CarD	1773	Mycobacterium_tuberculosis	reduced_virulence	35.22	159	94	2	1	150	2	160	6e-32	110
HM-7_03876	A0A384JPY4	PHI:9903	Bcser2_(Bcin08g02990)	40559	Botrytis_cinerea	reduced_virulence	36.36	286	122	12	146	416	176	416	2e-28	115
HM-7_03879	B5XR94	PHI:8967	MdtI	573	Klebsiella_pneumoniae	reduced_virulence	38.14	97	60	0	6	102	11	107	1e-14	63.5
HM-7_03880	B5XR94	PHI:8967	MdtI	573	Klebsiella_pneumoniae	reduced_virulence	36.36	99	63	0	8	106	11	109	6e-12	55.8
HM-7_03884	G4N2B7	PHI:6158	CKS1	318829	Magnaporthe_oryzae	reduced_virulence	31.78	343	159	9	17	294	42	374	7e-48	166
HM-7_03885	Q7W6Q2	PHI:3532	Hfq	520	Bordetella_pertussis	reduced_virulence	45.59	68	36	1	6	73	8	74	1e-18	70.9
HM-7_03892	P36548	PHI:10979	AmiA	562	Escherichia_coli	reduced_virulence	29.17	216	103	7	4	171	59	272	1e-13	67.8
HM-7_03893	I1REN7	PHI:1681	GzNF001	5518	Fusarium_graminearum	unaffected_pathogenicity	43.24	148	80	4	80	224	1850	1996	3e-33	128
HM-7_03897	P0A1P6	PHI:7742	GlnA	28901	Salmonella_enterica	reduced_virulence	42.07	473	233	12	5	442	2	468	2e-102	311
HM-7_03934	V9TM92	PHI:9266	FUM6	948311	Fusarium_proliferatum	reduced_virulence	42.2	372	208	4	68	433	2	372	1e-98	314
HM-7_03935	Q2FZL2	PHI:11227	SspA	1280	Staphylococcus_aureus	increased_virulence_(hypervirulence)_reduced_virulence_unaffected_pathogenicity	25.45	220	137	8	71	279	55	258	6e-11	60.8
HM-7_03944	Q8DP67	PHI:3151	Spr1327	1313	Streptococcus_pneumoniae	lethal	52.78	72	33	1	6	76	5	76	2e-22	80.5
HM-7_03945	Q8MPM3	PHI:8028	Tkt	5665	Leishmania_mexicana	loss_of_pathogenicity	45.99	661	339	10	1	658	1	646	1e-180	527
HM-7_03954	Q4WUL6	PHI:362_PHI:2520	LYSF_LYS4	746128	Aspergillus_fumigatus	loss_of_pathogenicity_lethal	26.67	435	242	13	158	580	151	520	4e-24	107
HM-7_03955	Q04KT1	PHI:3912	Etrx2	1313	Streptococcus_pneumoniae	unaffected_pathogenicity	36.03	136	82	4	32	162	43	178	3e-25	94
HM-7_03965	Q75WC5	PHI:824_PHI:6838	GyrA	337	Burkholderia_glumae	chemistry_target:_sensitivity_to_chemical_chemistry_target:_resistance_to_chemical_reduced_virulence_loss_of_pathogenicity	36.01	833	480	6	10	793	11	839	0	555
HM-7_03969	B5F7U8	PHI:8862	LeuB	28901	Salmonella_enterica	reduced_virulence	33.62	348	206	9	2	336	4	339	2e-55	184
HM-7_03970	D3QJB2	PHI:3526	LacA	28901	Salmonella_enterica	reduced_virulence	40	160	96	0	25	184	28	187	3e-44	144
HM-7_03987	J7KWZ6	PHI:3711	PCC21_023220	554	Pectobacterium_carotovorum	reduced_virulence	26.34	205	144	5	7	210	9	207	2e-22	89
HM-7_03988	J9VY90	PHI:9058_PHI:10688	Lac1	5207	Cryptococcus_neoformans	reduced_virulence	31.34	217	123	8	44	237	86	299	5e-18	82.4
HM-7_03992	Q2FV90	PHI:10168	FphB_(SAOUHSC_02844)	1280	Staphylococcus_aureus	reduced_virulence_unaffected_pathogenicity	38.13	299	184	1	9	307	25	322	2e-69	217
HM-7_03994	A0A0H2ZQ21	PHI:6501	BglA3	1313	Streptococcus_pneumoniae	reduced_virulence	29.4	500	285	12	8	484	4	458	2e-61	206
HM-7_03995	A8Z0F5	PHI:6308	GlcA	1280	Staphylococcus_aureus	reduced_virulence	47.13	157	76	1	456	605	501	657	2e-37	146
HM-7_03996	P11989	PHI:4630	PafR	562	Escherichia_coli	reduced_virulence	33.33	276	179	3	4	276	5	278	5e-46	154
HM-7_03998	Q5HFT1	PHI:10535	SrrB	1280	Staphylococcus_aureus	increased_virulence_(hypervirulence)_reduced_virulence	31.09	238	138	7	242	466	356	580	4e-24	103
HM-7_03999	Q93MY4	PHI:10228	CovR	1309	Streptococcus_mutans	unaffected_pathogenicity_reduced_virulence	45.71	210	107	2	25	228	21	229	4e-62	192
HM-7_04002	Q882F5	PHI:7788	AldB_(PSPTO_2673)	317	Pseudomonas_syringae	reduced_virulence	31.99	472	314	5	13	481	10	477	3e-69	228
HM-7_04004	A0A0H2UR33	PHI:7679	SatC	1313	Streptococcus_pneumoniae	reduced_virulence	32.68	254	164	4	26	276	30	279	7e-35	125
HM-7_04005	Q2YKU8	PHI:9131	Bab2_0548	235	Brucella_abortus	unaffected_pathogenicity	30.62	258	171	5	33	288	76	327	1e-29	114
HM-7_04007	P99175	PHI:11270	CcpA	1280	Staphylococcus_aureus	reduced_virulence	25.64	351	221	11	3	339	4	328	6e-28	109
HM-7_04014	A5CVB7	PHI:3028	Vatr2	28447	Clavibacter_michiganensis	reduced_virulence	23.1	394	276	8	69	450	23	401	1e-26	110
HM-7_04020	Q9P8L8	PHI:544	BCMFS1	40559	Botrytis_cinerea	unaffected_pathogenicity	29.9	515	331	9	2	498	87	589	1e-47	172
HM-7_04021	P99075	PHI:6903	FbaA	1280	Staphylococcus_aureus	reduced_virulence	40.97	288	165	2	1	285	1	286	1e-63	200
HM-7_04023	O51369	PHI:6524	FruA1	139	Borreliella_burgdorferi	unaffected_pathogenicity	39.26	461	260	6	4	456	164	612	2e-74	244
HM-7_04024	J7M380	PHI:6504	FruB	1314	Streptococcus_pyogenes	unaffected_pathogenicity	34.98	303	194	2	1	302	1	301	3e-64	202
HM-7_04025	A0A0F6AZV0	PHI:11065	STM14_1285_(AsiR)	28901	Salmonella_enterica	increased_virulence_(hypervirulence)	24.47	188	132	2	14	191	22	209	1e-11	61.6
HM-7_04026	D0CG26	PHI:5093	PLD2	470	Acinetobacter_baumannii	reduced_virulence	26.99	478	257	17	55	463	83	537	5e-35	135
HM-7_04030	A0A076ZMY5	PHI:7520	VK055_1952	573	Klebsiella_pneumoniae	unaffected_pathogenicity	39.87	474	277	6	4	469	3	476	1e-94	293
HM-7_04031	E0SDK2	PHI:8574	CysJ_(Dda3937_00209)	204038	Dickeya_dadantii	reduced_virulence	42.43	601	335	6	9	603	12	607	7e-162	474
HM-7_04032	D4HWM2	PHI:9323	CysI3	552	Erwinia_amylovora	unaffected_pathogenicity	50.63	557	269	3	10	565	13	564	0	595
HM-7_04033	P27550	PHI:9227	Acs	562	Escherichia_coli	reduced_virulence_unaffected_pathogenicity	34.44	633	374	17	32	636	24	643	4e-109	341
HM-7_04035	Q9I5I4	PHI:7979	DspI	287	Pseudomonas_aeruginosa	reduced_virulence	37.55	245	152	1	13	257	26	269	7e-35	124
HM-7_04038	I1S2C4	PHI:5068	MCC	5518	Fusarium_graminearum	reduced_virulence	43.61	438	243	3	5	440	646	1081	1e-118	379
HM-7_04039	Q4WR83	PHI:2321	SidI	746128	Aspergillus_fumigatus	reduced_virulence	42.55	550	294	9	7	543	38	578	3e-142	421
HM-7_04040	G5EHZ3	PHI:9055	MoIVD_(MGG_02540)	318829	Magnaporthe_oryzae	reduced_virulence	38.48	369	222	4	12	376	93	460	2e-80	252
HM-7_04042	E9AVK8	PHI:9832	LmDUSP1_(LmxM.22.0250)	5665	Leishmania_mexicana	reduced_virulence	25.88	255	176	8	2	253	4	248	8e-18	79
HM-7_04043	Q1J773	PHI:6503	FruR	1314	Streptococcus_pyogenes	unaffected_pathogenicity	31.1	209	138	4	21	226	11	216	3e-27	103
HM-7_04047	Q8Y282	PHI:8677	RSc0454	305	Ralstonia_solanacearum	loss_of_pathogenicity	24.92	321	170	8	10	261	160	478	2e-13	71.2
HM-7_04054	A0A0E0UVG9	PHI:6144	GalU	1639	Listeria_monocytogenes	reduced_virulence	52.9	276	128	2	1	275	1	275	2e-96	284
HM-7_04057	P0AC98	PHI:9230	SatP	562	Escherichia_coli	unaffected_pathogenicity	33.69	187	119	2	12	198	5	186	1e-12	62
HM-7_04060	I1S053	PHI:1772	GzZC087	5518	Fusarium_graminearum	reduced_virulence	37.5	112	58	3	32	136	536	642	6e-16	73.2
HM-7_04061	B2IM27	PHI:4706	DinF	1313	Streptococcus_pneumoniae	unaffected_pathogenicity	25.08	331	241	2	16	346	21	344	2e-15	76.3
HM-7_04063	Q8X116	PHI:540_PHI:1029	BCPME2_Bcpme2	40559	Botrytis_cinerea	unaffected_pathogenicity	29.67	273	171	9	35	289	40	309	5e-25	101
HM-7_04066	P37596	PHI:10669	NorW	562	Escherichia_coli	unaffected_pathogenicity_reduced_virulence	27.93	358	242	9	1	353	1	347	2e-28	116
HM-7_04067	P33937	PHI:10522	NapA	562	Escherichia_coli	reduced_virulence	25.4	803	477	19	15	707	35	825	1e-66	234
HM-7_04068	A0A0F6B5Q2	PHI:10062	STM14_RS15245	28901	Salmonella_enterica	unaffected_pathogenicity	25.71	385	272	8	4	384	3	377	3e-21	95.1
HM-7_04072	Q7CPB9	PHI:11385	OxyR	28901	Salmonella_enterica	reduced_virulence	30.15	272	188	2	1	271	1	271	3e-40	140
HM-7_04073	P9WQJ1	PHI:9596	Rv1273c	1772	Mycolicibacterium_smegmatis	increased_virulence_(hypervirulence)	42.58	566	320	3	8	570	10	573	3e-154	453
HM-7_04074	A0A0E0V727	PHI:6913	YbtQ	562	Escherichia_coli	reduced_virulence	32.27	406	253	7	211	604	187	582	1e-60	210
HM-7_04077	A5ICA4	PHI:11263	ProA	446	Legionella_pneumophila	reduced_virulence	45.05	404	211	4	25	422	19	417	2e-109	327
HM-7_04080	G7TIP9	PHI:4138	Xrp14	347	Xanthomonas_oryzae	reduced_virulence	27.32	410	269	8	3	394	1	399	6e-43	153
HM-7_04081	P45004	PHI:11664	DmsA	727	Haemophilus_influenzae	reduced_virulence	28.68	767	440	24	11	679	49	806	6e-65	228
HM-7_04082	Q9C1R1	PHI:570	XYL4	5507	Fusarium_oxysporum	unaffected_pathogenicity	47.72	197	92	3	26	219	38	226	2e-56	177
HM-7_04083	P77432	PHI:9990	LsrK	562	Escherichia_coli	reduced_virulence	21.88	512	358	12	3	485	13	511	5e-25	106
HM-7_04086	Q18CB9	PHI:9236	CdPpiB_(CD630_00330)	1496	Clostridioides_difficile	increased_virulence_(hypervirulence)	37.79	553	304	12	3	530	2	539	1e-120	364
HM-7_04087	Q9L7R4	PHI:6543	YihO	28901	Salmonella_enterica	unaffected_pathogenicity	31.33	450	299	6	8	452	10	454	2e-52	181
HM-7_04099	Q8ZPP8	PHI:601	Orf48	28901	Salmonella_enterica	unaffected_pathogenicity	34.42	430	268	8	9	429	5	429	2e-50	175
HM-7_04100	Q8DPY9	PHI:3156	Spr0930	1313	Streptococcus_pneumoniae	reduced_virulence	45.22	115	63	0	54	168	34	148	5e-29	106
HM-7_04101	A7ESB3	PHI:3329	Ss-oah1	5180	Sclerotinia_sclerotiorum	reduced_virulence	34.18	275	165	7	26	289	57	326	7e-37	132
HM-7_04108	B9XXL6	PHI:8011	Rhpa	210	Helicobacter_pylori	reduced_virulence	24.22	351	230	11	6	336	29	363	4e-20	92
HM-7_04114	A0A076ZMY5	PHI:7520	VK055_1952	573	Klebsiella_pneumoniae	unaffected_pathogenicity	45.61	478	254	3	20	492	4	480	1e-142	417
HM-7_04116	Q5IFQ6	PHI:410	SOD2	5207	Cryptococcus_neoformans	loss_of_pathogenicity	42.86	196	106	3	72	263	29	222	3e-55	176
HM-7_04118	Q2FH26	PHI:7353	OdhB	1280	Staphylococcus_aureus	unaffected_pathogenicity	54.48	424	185	4	1	418	1	422	1e-152	437
HM-7_04119	G2XIN6	PHI:9378	VdOGDH_(VDAG_10018)	27337	Verticillium_dahliae	reduced_virulence	36.76	993	536	18	17	943	74	1040	0	612
HM-7_04121	C0RKI3	PHI:11549	B0251	29459	Brucella_melitensis	unaffected_pathogenicity	29.58	240	159	6	56	292	38	270	8e-23	93.6
HM-7_04122	A0A063CKB3	PHI:9971	SodC	1396	Bacillus_cereus	reduced_virulence	37.04	189	102	4	1	189	1	172	2e-41	136
HM-7_04123	P0AFV4	PHI:11093	MepS	562	Escherichia_coli	reduced_virulence	40.74	108	59	4	340	443	79	185	5e-15	71.6
HM-7_04124	Q04JI6	PHI:4221	DacA	1313	Streptococcus_pneumoniae	lethal	49.58	119	59	1	77	194	111	229	1e-31	114
HM-7_04137	A0A0H2XGW3	PHI:7589	CtpA	1280	Staphylococcus_aureus	reduced_virulence	38.41	466	272	7	3	457	35	496	5e-93	289
HM-7_04149	Q17ZY8	PHI:9139	PrdR	1496	Clostridioides_difficile	increased_virulence_(hypervirulence)	33.85	449	277	7	14	453	142	579	4e-65	218
HM-7_04154	A0A3Q0L2P3	PHI:8516	Nab1_(VV1_0803)	672	Vibrio_vulnificus	reduced_virulence	29.57	230	160	2	6	234	2	230	4e-24	95.1
HM-7_04155	Q3XXA5	PHI:5307	CapD	1352	Enterococcus_faecium	unaffected_pathogenicity	45.45	154	80	1	12	165	1	150	1e-41	140
