# Supplementary material for: Comparative genomic analyses reveal genetic characteristics and pathogenic factors of Bacillus pumilus HM-7
Source: Front Microbiol. 2022 Nov 7;13:1008648. doi: 10.3389/fmicb.2022.1008648 (PMC9677121; doi:10.3389/fmicb.2022.1008648)
Supplement: Supplementary Table 6 — Prophage regions identification in HM-7 using PHASTER. [file Table_6.xlsx]

## Sheet: Prophage regions
Table S6 Prophage regions identification in HM-7 using PHASTER.
Region	Region Length	Completeness	Score	# Total Proteins	Region Position	Most Common Phage	GC %
1	100.3Kb	intact	110	136	177-100490	PHAGE_Bacill_SPbeta_NC_001884(43)	0.3391
2	67.6Kb	questionable	90	63	93656-161316	PHAGE_Bacill_SPbeta_NC_001884(26)	0.3488
3	28.1Kb	incomplete	40	40	960943-989089	PHAGE_Clostr_phiCT453A_NC_028991(7)	0.4079
4	82.9Kb	intact	150	145	2508533-2591517	PHAGE_Aeriba_AP45_NC_048651(18)	0.396
5	30.7Kb	incomplete	40	53	3920319-3951028	PHAGE_Bacill_SPbeta_NC_001884(13)	0.3385
Intact (score > 90)
Questionable (score 70-90)
Incomplete (score < 70)
Region:	The number assigned to the region.
Region Length:	The length of the sequence of that region (in bp).
Completeness:	A prediction of whether the region contains a intact or incomplete prophage based on the above criteria.
Score:	The score of the region based on the above criteria.
# Total Proteins:	The number of ORFs present in the region.
Region Position:	The start and end positions of the region on the bacterial chromosome.
Most Common Phage:	The phage(s) with the highest number of proteins most similar to those in the region.
GC %:	The percentage of GC nucleotides of the region.
