# Supplementary material for: Comparative genomic analyses reveal genetic characteristics and pathogenic factors of Bacillus pumilus HM-7
Source: Front Microbiol. 2022 Nov 7;13:1008648. doi: 10.3389/fmicb.2022.1008648 (PMC9677121; doi:10.3389/fmicb.2022.1008648)
Supplement: Supplementary Table 7 — Genes in three unique regions of HM-7. [file Table_7.xlsx]

## Sheet: Genes in regions
Table S7 Genes in three unique regions of HM-7.
Regions	Locus	Gene start	Gene end	Strand	Product	Phage BLAST Hit
RegionX	HM-7_02666	2510817	2512004	-	Tyrosine recombinase XerC	Hypothetical protein
RegionX	HM-7_02667	2512022	2512507	-	hypothetical protein	Hypothetical protein
RegionX	HM-7_02668	2512592	2513524	-	hypothetical protein	Phage-like protein
RegionX	HM-7_02669	2513718	2514077	-	HTH-type transcriptional regulator Xre	Phage-like protein
RegionX	HM-7_02670	2514240	2514464	+	hypothetical protein	Phage-like protein: cI-like repressor
RegionX	HM-7_02671	2514476	2514784	+	hypothetical protein	Hypothetical protein
RegionX	HM-7_02672	2514781	2515470	+	hypothetical protein	Phage-like protein: anti-repressor KilAC domain protein
RegionX	HM-7_02673	2515537	2516106	+	hypothetical protein	Hypothetical protein
RegionX	HM-7_02674	2516103	2516387	+	hypothetical protein	Hypothetical protein
RegionX	HM-7_02675	2516395	2516493	+	hypothetical protein	Hypothetical protein
RegionX	HM-7_02676	2516593	2516772	+	hypothetical protein	Hypothetical protein
RegionX	HM-7_02677	2516774	2517724	+	hypothetical protein	Hypothetical protein
RegionX	HM-7_02678	2517724	2518563	+	hypothetical protein	Hypothetical protein
RegionX	HM-7_02679	2518725	2519387	+	hypothetical protein	Hypothetical protein
RegionX	HM-7_02680	2519419	2520219	+	Primosomal protein DnaI	Phage-like protein
RegionX	HM-7_02681	2520221	2520397	+	hypothetical protein	Hypothetical protein
RegionX	HM-7_02682	2520492	2520884	+	hypothetical protein	Hypothetical protein
RegionX	HM-7_02683	2520999	2521301	+	hypothetical protein	Hypothetical protein
RegionX	HM-7_02684	2521291	2521755	+	hypothetical protein	Phage-like protein
RegionX	HM-7_02685	2521869	2522024	+	hypothetical protein	Hypothetical protein
RegionX	HM-7_02686	2522098	2522304	+	hypothetical protein	Hypothetical protein
RegionX	HM-7_02687	2522322	2522579	+	hypothetical protein	Hypothetical protein
RegionX	HM-7_02688	2522591	2522725	-	hypothetical protein	Hypothetical protein
RegionX	HM-7_02689	2522846	2523292	+	hypothetical protein	NA
RegionX	HM-7_02690	2523289	2523957	+	hypothetical protein	Hypothetical protein
RegionX	HM-7_02691	2523958	2524329	+	hypothetical protein	Phage-like protein
RegionX	HM-7_02692	2524326	2524697	+	hypothetical protein	Hypothetical protein
RegionX	HM-7_02693	2524819	2524995	+	hypothetical protein	Hypothetical protein
RegionX	HM-7_02694	2524992	2525285	+	hypothetical protein	Hypothetical protein
RegionX	HM-7_02695	2525287	2525556	+	hypothetical protein	Hypothetical protein
RegionX	HM-7_02696	2525553	2525723	+	hypothetical protein	Hypothetical protein
RegionX	HM-7_02697	2525726	2526151	+	hypothetical protein	Hypothetical protein
RegionX	HM-7_02698	2526163	2526411	+	hypothetical protein	Hypothetical protein
RegionX	HM-7_02699	2526416	2526598	+	hypothetical protein	Hypothetical protein
RegionX	HM-7_02700	2526820	2526942	+	hypothetical protein	Hypothetical protein
RegionX	HM-7_02701	2526960	2527415	+	hypothetical protein	Hypothetical protein
RegionX	HM-7_02702	2527570	2528229	+	hypothetical protein	Hypothetical protein
RegionX	HM-7_02703	2528371	2528793	+	hypothetical protein	Phage-like protein: methyltransferase type 11
RegionX	HM-7_02704	2528786	2530024	+	hypothetical protein	Hypothetical protein
RegionX	HM-7_02705	2530038	2531483	+	hypothetical protein	Portal Protein
RegionX	HM-7_02706	2531515	2532096	+	hypothetical protein	Hypothetical protein
RegionX	HM-7_02707	2532109	2533011	+	hypothetical protein	Coat Protein
RegionX	HM-7_02708	2533011	2533163	+	hypothetical protein	Hypothetical protein
RegionX	HM-7_02709	2533175	2534032	+	NAD(+)--arginine ADP-ribosyltransferase EFV	Phage-like protein: HNH endonuclease
RegionX	HM-7_02710	2534032	2534367	+	hypothetical protein	Phage-like protein: exonuclease
RegionX	HM-7_02711	2534372	2534872	+	hypothetical protein	Phage-like protein: recombination protein
RegionX	HM-7_02712	2534872	2535222	+	hypothetical protein	Phage-like protein: putative single-stranded DNA binding protein
RegionX	HM-7_02713	2535215	2535694	+	hypothetical protein	Hypothetical protein
RegionX	HM-7_02714	2535699	2536733	+	hypothetical protein	Fiber Protein
RegionX	HM-7_02715	2536748	2537149	+	hypothetical protein	Tail Shaft
RegionX	HM-7_02716	2537241	2537543	+	hypothetical protein	Tail Shaft
RegionX	HM-7_02717	2537566	2537691	+	hypothetical protein	Hypothetical protein
RegionX	HM-7_02718	2537692	2541321	+	hypothetical protein	Tail Shaft
RegionX	HM-7_02719	2541321	2541866	+	hypothetical protein	Tail Shaft
RegionX	HM-7_02720	2541877	2542224	+	hypothetical protein	Tail Shaft
RegionX	HM-7_02721	2542214	2543209	+	hypothetical protein	Hypothetical protein
RegionX	HM-7_02722	2543209	2543571	+	hypothetical protein	Hypothetical protein
RegionX	HM-7_02723	2543606	2543911	+	hypothetical protein	Hypothetical protein
RegionX	HM-7_02724	2543901	2545076	+	hypothetical protein	Hypothetical protein
RegionX	HM-7_02725	2545073	2545702	+	hypothetical protein	Hypothetical protein
RegionX	HM-7_02726	2545717	2546802	+	hypothetical protein	Hypothetical protein
RegionX	HM-7_02727	2546813	2547160	+	Phage-like element PBSX protein XkdW	Hypothetical protein
RegionX	HM-7_02728	2547150	2547341	+	hypothetical protein	Hypothetical protein
RegionX	HM-7_02729	2547402	2547617	+	Bacteriocin UviB	Phage-like protein: endolysin
RegionX	HM-7_02730	2547630	2547893	+	hypothetical protein	Hypothetical protein
RegionX	HM-7_02731	2547952	2548770	+	Peptidoglycan L-alanyl-D-glutamate endopeptidase CwlK	Phage-like protein: endolysin
RegionX	HM-7_02732	2548866	2548973	+	hypothetical protein	NA
RegionX	HM-7_02733	2549196	2549438	+	hypothetical protein	Hypothetical protein
RegionX	HM-7_02734	2549435	2549614	+	hypothetical protein	NA
RegionX	HM-7_02735	2549593	2550318	+	Toxin PezT	Coat Protein
RegionX	HM-7_02736	2550373	2550537	+	hypothetical protein	Hypothetical protein
RegionX	HM-7_02737	2550609	2550797	-	hypothetical protein	Phage-like protein: holin
RegionX	HM-7_02738	2551205	2552392	-	Tyrosine recombinase XerC	Hypothetical protein
RegionX	HM-7_02739	2552410	2552895	-	hypothetical protein	Hypothetical protein
RegionX	HM-7_02740	2552980	2553912	-	hypothetical protein	Phage-like protein
RegionX	HM-7_02741	2554106	2554465	-	HTH-type transcriptional regulator Xre	Phage-like protein
RegionX	HM-7_02742	2554628	2554852	+	hypothetical protein	Phage-like protein: cI-like repressor
RegionX	HM-7_02743	2554864	2555172	+	hypothetical protein	Hypothetical protein
RegionX	HM-7_02744	2555169	2555858	+	hypothetical protein	Phage-like protein: anti-repressor KilAC domain protein
RegionX	HM-7_02745	2555925	2556494	+	hypothetical protein	Hypothetical protein
RegionX	HM-7_02746	2556491	2556775	+	hypothetical protein	Hypothetical protein
RegionX	HM-7_02747	2556783	2556881	+	hypothetical protein	Hypothetical protein
RegionX	HM-7_02748	2556981	2557160	+	hypothetical protein	Hypothetical protein
RegionX	HM-7_02749	2557162	2558112	+	hypothetical protein	Hypothetical protein
RegionX	HM-7_02750	2558112	2558951	+	hypothetical protein	Hypothetical protein
RegionX	HM-7_02751	2559113	2559775	+	hypothetical protein	Hypothetical protein
RegionX	HM-7_02752	2559807	2560607	+	Primosomal protein DnaI	Phage-like protein
RegionX	HM-7_02753	2560609	2560785	+	hypothetical protein	Hypothetical protein
RegionX	HM-7_02754	2560880	2561272	+	hypothetical protein	Hypothetical protein
RegionX	HM-7_02755	2561387	2561689	+	hypothetical protein	Hypothetical protein
RegionX	HM-7_02756	2561679	2562143	+	hypothetical protein	Phage-like protein: endolysin
RegionX	HM-7_02757	2562257	2562412	+	hypothetical protein	Hypothetical protein
RegionX	HM-7_02758	2562486	2562692	+	hypothetical protein	Hypothetical protein
RegionX	HM-7_02759	2562710	2562967	+	hypothetical protein	Hypothetical protein
RegionX	HM-7_02760	2562979	2563113	-	hypothetical protein	Hypothetical protein
RegionX	HM-7_02761	2563234	2563680	+	hypothetical protein	NA
RegionX	HM-7_02762	2563677	2564345	+	hypothetical protein	Hypothetical protein
RegionX	HM-7_02763	2564346	2564717	+	hypothetical protein	Phage-like protein
RegionX	HM-7_02764	2564714	2565085	+	hypothetical protein	Hypothetical protein
RegionX	HM-7_02765	2565207	2565383	+	hypothetical protein	Hypothetical protein
RegionX	HM-7_02766	2565380	2565673	+	hypothetical protein	Hypothetical protein
RegionX	HM-7_02767	2565675	2565944	+	hypothetical protein	Hypothetical protein
RegionX	HM-7_02768	2565941	2566111	+	hypothetical protein	Hypothetical protein
RegionX	HM-7_02769	2566114	2566539	+	hypothetical protein	Hypothetical protein
RegionX	HM-7_02770	2566551	2566799	+	hypothetical protein	Hypothetical protein
RegionX	HM-7_02771	2566804	2566986	+	hypothetical protein	Hypothetical protein
RegionX	HM-7_02772	2567208	2567330	+	hypothetical protein	Hypothetical protein
RegionX	HM-7_02773	2567348	2567803	+	hypothetical protein	Hypothetical protein
RegionX	HM-7_02774	2567958	2568617	+	hypothetical protein	Hypothetical protein
RegionX	HM-7_02775	2568759	2569181	+	hypothetical protein	Phage-like protein: methyltransferase type 11
RegionX	HM-7_02776	2569174	2570412	+	hypothetical protein	Hypothetical protein
RegionX	HM-7_02777	2570426	2571871	+	hypothetical protein	Portal Protein
RegionX	HM-7_02778	2571903	2572484	+	hypothetical protein	Hypothetical protein
RegionX	HM-7_02779	2572497	2573399	+	hypothetical protein	Coat Protein
RegionX	HM-7_02780	2573399	2573551	+	hypothetical protein	Hypothetical protein
RegionX	HM-7_02781	2573563	2574420	+	NAD(+)--arginine ADP-ribosyltransferase EFV	Phage-like protein: HNH endonuclease
RegionX	HM-7_02782	2574420	2574755	+	hypothetical protein	Phage-like protein: exonuclease
RegionX	HM-7_02783	2574760	2575260	+	hypothetical protein	Phage-like protein: recombination protein
RegionX	HM-7_02784	2575260	2575610	+	hypothetical protein	Phage-like protein: putative single-stranded DNA binding protein
RegionX	HM-7_02785	2575603	2576082	+	hypothetical protein	Hypothetical protein
RegionX	HM-7_02786	2576087	2577121	+	hypothetical protein	Fiber protein
RegionX	HM-7_02787	2577136	2577537	+	hypothetical protein	Tail Shaft
RegionX	HM-7_02788	2577629	2577931	+	hypothetical protein	Tail Shaft
RegionX	HM-7_02789	2577954	2578079	+	hypothetical protein	Hypothetical protein
RegionX	HM-7_02790	2578080	2581709	+	hypothetical protein	Tail Shaft
RegionX	HM-7_02791	2581709	2582254	+	hypothetical protein	Tail Shaft
RegionX	HM-7_02792	2582265	2582612	+	hypothetical protein	Tail Shaft
RegionX	HM-7_02793	2582602	2583597	+	hypothetical protein	Hypothetical protein
RegionX	HM-7_02794	2583597	2583959	+	hypothetical protein	Hypothetical protein
RegionX	HM-7_02795	2583994	2584299	+	hypothetical protein	NA
RegionX	HM-7_02796	2584289	2585464	+	hypothetical protein	Hypothetical protein
RegionX	HM-7_02797	2585461	2586090	+	hypothetical protein	Hypothetical protein
RegionX	HM-7_02798	2586105	2587190	+	hypothetical protein	Hypothetical protein
RegionX	HM-7_02799	2587201	2587548	+	Phage-like element PBSX protein XkdW	Hypothetical protein
RegionX	HM-7_02800	2587538	2587729	+	hypothetical protein	Hypothetical protein
RegionX	HM-7_02801	2587790	2588005	+	Bacteriocin UviB	Phage-like protein: endolysin
RegionX	HM-7_02802	2588018	2588281	+	hypothetical protein	Hypothetical protein
RegionX	HM-7_02803	2588340	2589158	+	Peptidoglycan L-alanyl-D-glutamate endopeptidase CwlK	Phage-like protein: endolysin
RegionX	HM-7_02804	2589254	2589361	+	hypothetical protein	NA
RegionX	HM-7_02805	2589584	2589826	+	hypothetical protein	Hypothetical protein
RegionX	HM-7_02806	2589823	2590002	+	hypothetical protein	NA
RegionX	HM-7_02807	2589981	2590706	+	Toxin PezT	Coat Protein
RegionX	HM-7_02808	2590761	2590925	+	hypothetical protein	Hypothetical protein
RegionX	HM-7_02809	2590997	2591185	-	hypothetical protein	Phage-like protein: holin
RegionX	HM-7_02829	2610707	2611816	-	HTH-type transcriptional regulator ChbR	NA
RegionX	HM-7_02830	2611816	2613480	-	2-isopropylmalate synthase	NA
RegionX	HM-7_02831	2613903	2613992	-	hypothetical protein	NA
RegionX	HM-7_02832	2614023	2614550	-	hypothetical protein	NA
RegionX	HM-7_02833	2614647	2614910	-	Transposon Tn10 TetD protein	NA
RegionX	HM-7_02834	2615908	2616129	+	hypothetical protein	NA
RegionX	HM-7_02835	2616370	2617614	+	hypothetical protein	NA
RegionY	HM-7_00001	469	858	+	product=hypothetical protein	Phage-like protein
RegionY	HM-7_00002	1513	2166	+	product=hypothetical protein	Phage-like protein
RegionY	HM-7_00003	2376	2858	+	product=hypothetical protein	Phage-like protein
RegionY	HM-7_00004	2843	3226	+	product=hypothetical protein	Hypothetical protein
RegionY	HM-7_00005	3634	3756	+	product=Membrane-bound lytic murein transglycosylase F	Phage-like protein
RegionY	HM-7_00006	3783	6116	+	product=Murein DD-endopeptidase MepM	Phage-like protein
RegionY	HM-7_00007	6162	6953	+	product=hypothetical protein	Hypothetical protein
RegionY	HM-7_00008	6969	9662	+	product=hypothetical protein	Phage-like protein
RegionY	HM-7_00009	9679	10494	+	product=hypothetical protein	Hypothetical protein
RegionY	HM-7_00010	10506	12275	+	product=Plasmin and fibronectin-binding protein A	Tail protein
RegionY	HM-7_00011	12405	13766	+	product=N-acetylmuramoyl-L-alanine amidase CwlA	Phage-like protein
RegionY	HM-7_00012	13875	14264	+	product=hypothetical protein	Hypothetical protein
RegionY	HM-7_00013	14278	14529	+	product=hypothetical protein	Phage-like protein
RegionY	HM-7_00014	14529	14795	+	product=hypothetical protein	Hypothetical protein
RegionY	HM-7_00015	14842	15126	+	product=hypothetical protein	Phage-like protein
RegionY	HM-7_00016	15123	15380	+	product=hypothetical protein	NA
RegionY	HM-7_00017	15396	17498	+	product=hypothetical protein	Phage-like protein
RegionY	HM-7_00018	17509	18357	+	product=hypothetical protein	Phage-like protein
RegionY	HM-7_00019	18912	19211	+	product=hypothetical protein	Phage-like protein
RegionY	HM-7_00020	19211	19483	+	product=hypothetical protein	Hypothetical protein
RegionY	HM-7_00021	19483	20334	+	product=hypothetical protein	Phage-like protein
RegionY	HM-7_00022	20570	21790	-	product=DNA polymerase IV	Phage-like protein
RegionY	HM-7_00023	21831	22160	-	product=hypothetical protein	Hypothetical protein
RegionY	HM-7_00024	22121	22258	-	product=hypothetical protein	Hypothetical protein
RegionY	HM-7_00025	22308	23327	+	product=hypothetical protein	Hypothetical protein
RegionY	HM-7_00026	23338	23907	-	product=hypothetical protein	Hypothetical protein
RegionY	HM-7_00027	23909	25675	-	product=putative ribonuclease YokI	Hypothetical protein
RegionY	HM-7_00028	25764	25898	-	product=hypothetical protein	Hypothetical protein
RegionY	HM-7_00029	25899	27008	-	product=Response regulator aspartate phosphatase J	Hypothetical protein
RegionY	HM-7_00030	27222	27644	-	product=hypothetical protein	Hypothetical protein
RegionY	HM-7_00031	27665	29029	-	product=hypothetical protein	Phage-like protein
RegionY	HM-7_00032	29254	30861	+	product=hypothetical protein	Phage-like protein
RegionY	HM-7_00033	30927	31118	-	product=hypothetical protein	Hypothetical protein
RegionY	HM-7_00034	31122	31709	-	product=hypothetical protein	Hypothetical protein
RegionY	HM-7_00035	31781	32050	+	product=hypothetical protein	Hypothetical protein
RegionY	HM-7_00036	32078	32473	-	product=hypothetical protein	Hypothetical protein
RegionY	HM-7_00037	32466	32651	-	product=hypothetical protein	Hypothetical protein
RegionY	HM-7_00038	32666	33190	-	product=Thymidine kinase	Phage-like protein
RegionY	HM-7_00039	33223	33393	-	product=hypothetical protein	Hypothetical protein
RegionY	HM-7_00040	33430	33600	-	product=hypothetical protein	Hypothetical protein
RegionY	HM-7_00041	33802	33972	-	product=hypothetical protein	Hypothetical protein
RegionY	HM-7_00042	33969	34139	-	product=hypothetical protein	Hypothetical protein
RegionY	HM-7_00043	34136	34657	-	product=hypothetical protein	Hypothetical protein
RegionY	HM-7_00044	34691	34993	-	product=hypothetical protein	NA
RegionY	HM-7_00045	35024	35239	-	product=hypothetical protein	Hypothetical protein
RegionY	HM-7_00046	35304	35996	+	product=hypothetical protein	Hypothetical protein
RegionY	HM-7_00047	36051	36191	-	product=hypothetical protein	Hypothetical protein
RegionY	HM-7_00048	36233	36775	-	product=hypothetical protein	Hypothetical protein
RegionY	HM-7_00049	36848	37267	-	product=hypothetical protein	Hypothetical protein
RegionY	HM-7_00050	37617	37856	-	product=hypothetical protein	Hypothetical protein
RegionY	HM-7_00051	37909	38322	-	product=hypothetical protein	Hypothetical protein
RegionY	HM-7_00052	38322	39119	-	product=DNA adenine methylase	Phage-like protein
RegionY	HM-7_00053	39295	39810	-	product=Dihydrofolate reductase	Hypothetical protein
RegionY	HM-7_00054	39807	40616	-	product=Thymidylate synthase	Phage-like protein
RegionY	HM-7_00055	40662	41261	+	product=hypothetical protein	Hypothetical protein
RegionY	HM-7_00056	41287	41523	-	product=hypothetical protein	Hypothetical protein
RegionY	HM-7_00057	41498	41722	-	product=hypothetical protein	NA
RegionY	HM-7_00058	41715	41957	-	product=hypothetical protein	Hypothetical protein
RegionY	HM-7_00059	42089	42679	-	product=hypothetical protein	Hypothetical protein
RegionY	HM-7_00060	42742	43170	-	product=putative deoxyuridine 5'-triphosphate nucleotidohydrolase YncF	Phage-like protein
RegionY	HM-7_00061	43222	43353	-	product=hypothetical protein	Hypothetical protein
RegionY	HM-7_00062	43623	43829	-	product=hypothetical protein	NA
RegionY	HM-7_00063	43835	44818	-	product=Ribonucleoside-diphosphate reductase subunit beta	Hypothetical protein
RegionY	HM-7_00064	44850	45560	-	product=hypothetical protein	Hypothetical protein
RegionY	HM-7_00065	45804	48164	-	product=Ribonucleoside-diphosphate reductase subunit alpha 1	Phage-like protein
RegionY	HM-7_00066	48493	49176	-	product=hypothetical protein	Phage-like protein
RegionY	HM-7_00067	49275	50006	-	product=Ribonucleoside-diphosphate reductase subunit alpha 1	Phage-like protein
RegionY	HM-7_00068	49978	50364	-	product=Protein NrdI	Hypothetical protein
RegionY	HM-7_00069	50364	50711	-	product=hypothetical protein	Hypothetical protein
RegionY	HM-7_00070	50772	51017	-	product=hypothetical protein	Hypothetical protein
RegionY	HM-7_00071	51069	51203	-	product=hypothetical protein	Hypothetical protein
RegionY	HM-7_00072	51217	51408	-	product=hypothetical protein	Hypothetical protein
RegionY	HM-7_00073	51436	51807	-	product=hypothetical protein	Hypothetical protein
RegionY	HM-7_00074	51853	52155	-	product=hypothetical protein	Hypothetical protein
RegionY	HM-7_00075	52174	52464	-	product=hypothetical protein	Hypothetical protein
RegionY	HM-7_00076	52504	52764	-	product=hypothetical protein	Hypothetical protein
RegionY	HM-7_00077	52941	53207	-	product=hypothetical protein	NA
RegionY	HM-7_00078	53394	53621	-	product=hypothetical protein	Hypothetical protein
RegionY	HM-7_00079	53703	53867	-	product=hypothetical protein	Hypothetical protein
RegionY	HM-7_00080	54081	54398	-	product=hypothetical protein	Hypothetical protein
RegionY	HM-7_00081	54413	54784	-	product=hypothetical protein	Hypothetical protein
RegionY	HM-7_00082	54781	54990	-	product=hypothetical protein	Hypothetical protein
RegionY	HM-7_00083	55030	55800	-	product=Modification methylase MboII	Phage-like protein
RegionY	HM-7_00084	55845	56366	-	product=Putative 5'(3')-deoxyribonucleotidase	Hypothetical protein
RegionY	HM-7_00085	56363	56869	-	product=SPBc2 prophage-derived uncharacterized protein YorR	Hypothetical protein
RegionY	HM-7_00086	56866	57024	-	product=hypothetical protein	NA
RegionY	HM-7_00087	57029	57184	-	product=hypothetical protein	NA
RegionY	HM-7_00088	57202	57882	-	product=Cell wall-binding protein YocH	Tail protein
RegionY	HM-7_00089	57882	61796	-	product=DNA polymerase III subunit alpha	Phage-like protein
RegionY	HM-7_00090	61807	63531	-	product=Putative SPBc2 prophage-derived single-strand DNA-specific exonuclease YorK	Phage-like protein
RegionY	HM-7_00091	63532	64506	-	product=hypothetical protein	Hypothetical protein
RegionY	HM-7_00092	64674	66197	-	product=Replicative DNA helicase	Phage-like protein
RegionY	HM-7_00093	66212	66679	-	product=hypothetical protein	Hypothetical protein
RegionY	HM-7_00094	66725	67696	-	product=hypothetical protein	Phage-like protein
RegionY	HM-7_00095	67746	68663	-	product=hypothetical protein	Hypothetical protein
RegionY	HM-7_00096	68692	69003	-	product=hypothetical protein	Hypothetical protein
RegionY	HM-7_00097	69145	69384	-	product=hypothetical protein	NA
RegionY	HM-7_00098	69396	70199	-	product=hypothetical protein	Hypothetical protein
RegionY	HM-7_00099	70311	70871	-	product=Guanylate kinase	Hypothetical protein
RegionY	HM-7_00100	70864	71256	-	product=hypothetical protein	Hypothetical protein
RegionY	HM-7_00101	71267	71980	-	product=Serine/threonine-protein phosphatase 1	Coat Protein
RegionY	HM-7_00102	72101	72541	+	product=hypothetical protein	Hypothetical protein
RegionY	HM-7_00103	72581	72781	-	product=hypothetical protein	Tail protein
RegionY	HM-7_00104	72844	72990	-	product=hypothetical protein	Hypothetical protein
RegionY	HM-7_00105	73002	73781	-	product=hypothetical protein	Hypothetical protein
RegionY	HM-7_00106	73931	74155	-	product=hypothetical protein	Hypothetical protein
RegionY	HM-7_00107	74165	74434	-	product=hypothetical protein	Hypothetical protein
RegionY	HM-7_00108	74431	74652	-	product=hypothetical protein	Hypothetical protein
RegionY	HM-7_00109	74649	74819	-	product=hypothetical protein	Hypothetical protein
RegionY	HM-7_00110	74816	75229	-	product=hypothetical protein	Hypothetical protein
RegionY	HM-7_00111	75270	75644	-	product=hypothetical protein	Phage-like protein
RegionY	HM-7_00112	75682	75996	-	product=hypothetical protein	Hypothetical protein
RegionY	HM-7_00113	76017	76232	-	product=hypothetical protein	Hypothetical protein
RegionY	HM-7_00114	76522	76689	+	product=hypothetical protein	Hypothetical protein
RegionY	HM-7_00115	76754	77068	-	product=hypothetical protein	Hypothetical protein
RegionY	HM-7_00116	77128	77283	-	product=hypothetical protein	Hypothetical protein
RegionY	HM-7_00117	77310	77501	-	product=hypothetical protein	Phage-like protein
RegionY	HM-7_00118	77654	78262	-	product=hypothetical protein	Hypothetical protein
RegionY	HM-7_00119	78291	78476	-	product=hypothetical protein	Hypothetical protein
RegionY	HM-7_00120	78517	78762	-	product=hypothetical protein	Hypothetical protein
RegionY	HM-7_00121	78775	79449	-	product=hypothetical protein	Hypothetical protein
RegionY	HM-7_00122	79506	79922	-	product=hypothetical protein	Hypothetical protein
RegionY	HM-7_00123	80476	80925	-	product=Ribonuclease HI	Phage-like protein
RegionY	HM-7_00124	80943	82094	-	product=ATP-dependent RecD-like DNA helicase	Hypothetical protein
RegionY	HM-7_00125	82114	82371	-	product=hypothetical protein	Hypothetical protein
RegionY	HM-7_00126	82471	82641	-	product=hypothetical protein	Hypothetical protein
RegionY	HM-7_00127	83043	83261	-	product=hypothetical protein	Hypothetical protein
RegionY	HM-7_00128	83448	83666	+	product=hypothetical protein	Hypothetical protein
RegionY	HM-7_00129	83821	84810	-	product=hypothetical protein	Hypothetical protein
RegionY	HM-7_00130	84813	86201	-	product=hypothetical protein	Hypothetical protein
RegionY	HM-7_00131	86288	87370	-	product=Tyrosine recombinase XerC	Hypothetical protein
RegionY	HM-7_00132	87384	87566	-	product=hypothetical protein	Hypothetical protein
RegionY	HM-7_00133	87625	87933	-	product=hypothetical protein	Hypothetical protein
RegionY	HM-7_00134	87946	88131	-	product=hypothetical protein	Hypothetical protein
RegionY	HM-7_00135	88375	88503	-	product=hypothetical protein	Hypothetical protein
RegionY	HM-7_00136	88532	89695	-	product=hypothetical protein	Hypothetical protein
RegionY	HM-7_00137	90170	91216	-	product=hypothetical protein	NA
RegionY	HM-7_00138	91258	92037	-	product=hypothetical protein	NA
RegionY	HM-7_00139	92275	92664	-	product=hypothetical protein	NA
RegionY	HM-7_00140	92661	92831	-	product=hypothetical protein	NA
RegionY	HM-7_00141	92848	93006	-	product=hypothetical protein	NA
RegionY	HM-7_00142	93504	93596	-	product=hypothetical protein	NA
RegionY	HM-7_00143	93681	94418	-	product=hypothetical protein	NA
RegionY	HM-7_00144	94548	94727	-	product=hypothetical protein	NA
RegionY	HM-7_00145	94764	95072	-	product=hypothetical protein	NA
RegionY	HM-7_00146	95197	96801	-	product=hypothetical protein	NA
RegionY	HM-7_00147	96855	98717	-	product=hypothetical protein	NA
RegionY	HM-7_00148	98839	99084	-	product=hypothetical protein	NA
RegionY	HM-7_00149	99384	100475	-	product=hypothetical protein	NA
RegionY	HM-7_00150	101898	103010	-	product=Tubulin-like protein CetZ	Phage-like protein
RegionY	HM-7_00151	103010	103306	-	product=hypothetical protein	Hypothetical protein
RegionY	HM-7_00152	103774	103953	+	product=hypothetical protein	Hypothetical protein
RegionY	HM-7_00153	103966	106497	+	product=hypothetical protein	Hypothetical protein
RegionY	HM-7_00154	106723	106998	+	product=DNA-binding protein HRL53	Phage-like protein
RegionY	HM-7_00155	107342	107500	+	product=hypothetical protein	Hypothetical protein
RegionY	HM-7_00156	108289	108480	+	product=SPBc2 prophage-derived uncharacterized protein YonK	Hypothetical protein
RegionY	HM-7_00157	108495	109715	+	product=hypothetical protein	Hypothetical protein
RegionY	HM-7_00158	109737	110192	+	product=hypothetical protein	Hypothetical protein
RegionY	HM-7_00159	110239	110664	+	product=hypothetical protein	Hypothetical protein
RegionY	HM-7_00160	110748	111749	+	product=hypothetical protein	Hypothetical protein
RegionY	HM-7_00161	111749	113497	+	product=hypothetical protein	Phage-like protein
RegionY	HM-7_00162	113513	115054	+	product=hypothetical protein	Hypothetical protein
RegionY	HM-7_00163	115073	116212	+	product=hypothetical protein	Hypothetical protein
RegionY	HM-7_00164	116247	116711	+	product=hypothetical protein	Hypothetical protein
RegionY	HM-7_00165	116735	117841	+	product=hypothetical protein	Hypothetical protein
RegionY	HM-7_00166	117890	118351	+	product=hypothetical protein	Hypothetical protein
RegionY	HM-7_00167	118365	118751	+	product=hypothetical protein	Hypothetical protein
RegionY	HM-7_00168	118761	119423	+	product=hypothetical protein	Hypothetical protein
RegionY	HM-7_00169	119420	119944	+	product=hypothetical protein	NA
RegionY	HM-7_00170	119941	120651	+	product=hypothetical protein	Hypothetical protein
RegionY	HM-7_00171	120683	121459	+	product=hypothetical protein	Hypothetical protein
RegionY	HM-7_00172	121517	121885	+	product=hypothetical protein	Hypothetical protein
RegionY	HM-7_00173	121885	122715	+	product=hypothetical protein	Hypothetical protein
RegionY	HM-7_04155	3920319	3920819	+	product=UDP-N-acetylglucosamine 4%2C6-dehydratase (inverting)	Phage-like protein: nucleotide-sugar epimerase
RegionY	HM-7_04156	3920777	3920968	-	product=hypothetical protein	Hypothetical protein
RegionY	HM-7_04157	3920972	3921559	-	product=hypothetical protein	Hypothetical protein
RegionY	HM-7_04158	3921631	3921900	+	product=hypothetical protein	NA
RegionY	HM-7_04159	3921928	3922323	-	product=hypothetical protein	Hypothetical protein
RegionY	HM-7_04160	3922316	3922501	-	product=hypothetical protein	Hypothetical protein
RegionY	HM-7_04161	3922516	3923040	-	product=Thymidine kinase	Phage-like protein
RegionY	HM-7_04162	3923073	3923243	-	product=hypothetical protein	Hypothetical protein
RegionY	HM-7_04163	3923280	3923450	-	product=hypothetical protein	NA
RegionY	HM-7_04164	3923652	3923822	-	product=hypothetical protein	NA
RegionY	HM-7_04165	3923819	3923989	-	product=hypothetical protein	Hypothetical protein
RegionY	HM-7_04166	3923986	3924507	-	product=hypothetical protein	Hypothetical protein
RegionY	HM-7_04167	3924541	3924843	-	product=hypothetical protein	NA
RegionY	HM-7_04168	3924874	3925089	-	product=hypothetical protein	Hypothetical protein
RegionY	HM-7_04169	3925154	3925846	+	product=hypothetical protein	Hypothetical protein
RegionY	HM-7_04170	3925901	3926041	-	product=hypothetical protein	Hypothetical protein
RegionY	HM-7_04171	3926083	3926625	-	product=hypothetical protein	Hypothetical protein
RegionY	HM-7_04172	3926698	3927117	-	product=hypothetical protein	Hypothetical protein
RegionY	HM-7_04173	3927467	3927706	-	product=hypothetical protein	NA
RegionY	HM-7_04174	3927759	3928172	-	product=hypothetical protein	Hypothetical protein
RegionY	HM-7_04175	3928172	3928969	-	product=DNA adenine methylase	Phage-like protein: DNA adenine methylase gp25
RegionY	HM-7_04176	3929145	3929660	-	product=Dihydrofolate reductase	Hypothetical protein
RegionY	HM-7_04177	3929657	3930466	-	product=Thymidylate synthase	Phage-like protein: putative thymidylate synthase
RegionY	HM-7_04178	3930512	3931111	+	product=hypothetical protein	Hypothetical protein
RegionY	HM-7_04179	3931137	3931373	-	product=hypothetical protein	Hypothetical protein
RegionY	HM-7_04180	3931348	3931572	-	product=hypothetical protein	NA
RegionY	HM-7_04181	3931565	3931807	-	product=hypothetical protein	Hypothetical protein
RegionY	HM-7_04182	3931939	3932529	-	product=hypothetical protein	Hypothetical protein
RegionY	HM-7_04183	3932592	3933020	-	product=putative deoxyuridine 5'-triphosphate nucleotidohydrolase YncF	Phage-like protein: putative dUTPase
RegionY	HM-7_04184	3933072	3933203	-	product=hypothetical protein	Hypothetical protein
RegionY	HM-7_04185	3933473	3933679	-	product=hypothetical protein	NA
RegionY	HM-7_04186	3933685	3934668	-	product=Ribonucleoside-diphosphate reductase subunit beta	Hypothetical protein
RegionY	HM-7_04187	3934700	3935410	-	product=hypothetical protein	Hypothetical protein
RegionY	HM-7_04188	3935654	3938014	-	product=Ribonucleoside-diphosphate reductase subunit alpha 1	Phage-like protein: ribunucleotide reductase large subunit
RegionY	HM-7_04189	3938343	3939026	-	product=hypothetical protein	Phage-like protein: putative HNH endonuclease
RegionY	HM-7_04190	3939125	3939856	-	product=Ribonucleoside-diphosphate reductase subunit alpha 1	Phage-like protein: putative ribonucleotide-diphosphatereductase sudunit alpha N-terminal protein
RegionY	HM-7_04191	3939828	3940214	-	product=Protein NrdI	NA
RegionY	HM-7_04192	3940214	3940561	-	product=hypothetical protein	Hypothetical protein
RegionY	HM-7_04193	3940622	3940867	-	product=hypothetical protein	Hypothetical protein
RegionY	HM-7_04194	3940919	3941053	-	product=hypothetical protein	Hypothetical protein
RegionY	HM-7_04195	3941067	3941258	-	product=hypothetical protein	Hypothetical protein
RegionY	HM-7_04196	3941286	3941657	-	product=hypothetical protein	Hypothetical protein
RegionY	HM-7_04197	3941703	3942005	-	product=hypothetical protein	Hypothetical protein
RegionY	HM-7_04198	3942024	3942314	-	product=hypothetical protein	Hypothetical protein
RegionY	HM-7_04199	3942354	3942614	-	product=hypothetical protein	Hypothetical protein
RegionY	HM-7_04200	3942791	3943057	-	product=hypothetical protein	NA
RegionY	HM-7_04201	3943244	3943471	-	product=hypothetical protein	Hypothetical protein
RegionY	HM-7_04202	3943553	3943717	-	product=hypothetical protein	Hypothetical protein
RegionY	HM-7_04203	3943931	3944248	-	product=hypothetical protein	Hypothetical protein
RegionY	HM-7_04204	3944263	3944634	-	product=hypothetical protein	Hypothetical protein
RegionY	HM-7_04205	3944631	3944840	-	product=hypothetical protein	Hypothetical protein
RegionY	HM-7_04206	3944880	3945020	-	product=Modification methylase DpnIIB	Phage-like protein: DNA methylase
RegionY	HM-7_04207	3945236	3945649	-	product=Modification methylase MboII	Hypothetical protein
RegionY	HM-7_04208	3945694	3946215	-	product=Putative 5'(3')-deoxyribonucleotidase	Hypothetical protein
RegionY	HM-7_04209	3946212	3946718	-	product=SPBc2 prophage-derived uncharacterized protein YorR	Hypothetical protein
RegionY	HM-7_04210	3946715	3946873	-	product=hypothetical protein	NA
RegionY	HM-7_04211	3946878	3947033	-	product=hypothetical protein	Hypothetical protein
RegionY	HM-7_04212	3947051	3947731	-	product=Cell wall-binding protein YocH	Tail Shaft
RegionY	HM-7_04213	3947766	3949733	-	product=DNA polymerase III subunit alpha	Tail Shaft: putative DNA polymerase
RegionY	HM-7_04214	3949908	3950297	-	product=DNA polymerase III subunit alpha	NA
RegionY	HM-7_04215	3950333	3951028	-	product=DNA polymerase III PolC-type	Phage-like protein
RegionY	HM-7_04216	3951219	3951446	-	product=hypothetical protein	NA
RegionZ	HM-7_00174	122728	123006		product=hypothetical protein	Hypothetical protein
RegionZ	HM-7_00175	123006	123146		product=hypothetical protein	Hypothetical protein
RegionZ	HM-7_00176	123184	123366		product=hypothetical protein	NA
RegionZ	HM-7_00177	123417	123896		product=hypothetical protein	Hypothetical protein
RegionZ	HM-7_00178	123896	124318		product=hypothetical protein	Hypothetical protein
RegionZ	HM-7_00179	124333	125358		product=Tyrosine recombinase XerC	Phage-like protein
RegionZ	HM-7_00180	125502	125849		product=HTH-type transcriptional regulator Xre	NA
RegionZ	HM-7_00181	125973	126188		product=hypothetical protein	Hypothetical protein
RegionZ	HM-7_00182	126218	126733		product=hypothetical protein	Hypothetical protein
RegionZ	HM-7_00183	126821	127312		product=hypothetical protein	Hypothetical protein
RegionZ	HM-7_00184	127387	128013		product=hypothetical protein	Phage-like protein
RegionZ	HM-7_00185	128061	134918		product=Murein DD-endopeptidase MepM	Phage-like protein
RegionZ	HM-7_00186	134964	135755		product=hypothetical protein	Hypothetical protein
RegionZ	HM-7_00187	135771	138464		product=hypothetical protein	Phage-like protein
RegionZ	HM-7_00188	138481	139296		product=hypothetical protein	Hypothetical protein
RegionZ	HM-7_00189	139308	141077		product=Plasmin and fibronectin-binding protein A	Tail Shaft
RegionZ	HM-7_00190	141207	142568		product=N-acetylmuramoyl-L-alanine amidase CwlA	Phage-like protein
RegionZ	HM-7_00191	142677	143066		product=hypothetical protein	Hypothetical protein
RegionZ	HM-7_00192	143080	143331		product=hypothetical protein	Phage-like protein
RegionZ	HM-7_00193	143331	143597		product=hypothetical protein	Hypothetical protein
RegionZ	HM-7_00194	143644	143928		product=hypothetical protein	Phage-like protein
RegionZ	HM-7_00195	143925	144182		product=hypothetical protein	NA
RegionZ	HM-7_00196	144198	146300		product=hypothetical protein	Phage-like protein
RegionZ	HM-7_00197	146311	147159		product=hypothetical protein	Phage-like protein
RegionZ	HM-7_00198	147714	148013		product=hypothetical protein	Phage-like protein
RegionZ	HM-7_00199	148013	148285		product=hypothetical protein	Hypothetical protein
RegionZ	HM-7_00200	148285	149136		product=hypothetical protein	Phage-like protein
RegionZ	HM-7_00201	149372	150592		product=DNA polymerase IV	Phage-like protein IMPB/MUCB/SAMB family protein
RegionZ	HM-7_00202	150633	150962		product=hypothetical protein	Hypothetical protein
RegionZ	HM-7_00203	150923	151060		product=hypothetical protein	Hypothetical protein
RegionZ	HM-7_00204	151110	152129		product=hypothetical protein	Hypothetical protein
RegionZ	HM-7_00205	152140	152709		product=hypothetical protein	Hypothetical protein
RegionZ	HM-7_00206	152711	154477		product=putative ribonuclease YokI	Hypothetical protein
RegionZ	HM-7_00207	154566	154700		product=hypothetical protein	Hypothetical protein
RegionZ	HM-7_00208	154701	155810		product=Response regulator aspartate phosphatase J	Hypothetical protein
RegionZ	HM-7_00209	156024	156446		product=hypothetical protein	Hypothetical protein
RegionZ	HM-7_00210	156467	157831		product=hypothetical protein	Phage-like protein
RegionZ	HM-7_00211	158056	159663		product=hypothetical protein	Phage-like protein: site-specific recombinase
